# Supplementary material for: Auxiliary-assisted palladium-catalyzed halogenation of unactivated C(sp3)–H bonds at room temperature
Source: Royal Society of Chemistry journal article supplement (doi:10.1039/c6cc00234j), 2016-01-01

# Auxiliary-assisted palladium-catalyzed halogenation of C(sp<sup>3</sup>)-H bonds at room temperature

## SUPPORTING INFORMATION

| Table of contents                                                                  | page |
|------------------------------------------------------------------------------------|------|
| I. Materials and Methods                                                           | S2   |
| II. Density functional theory (DFT) calculation                                    | S2   |
| III. Directing groups synthesis and screening                                      | S5   |
| IV. Optimization of reaction conditions                                            | S8   |
| V. Substrates preparation                                                          | S8   |
| VI. General procedure for Pd-catalyzed C(sp <sup>3</sup> )-H halogenation reaction | S10  |
| VII. General procedure for directing group removing                                | S10  |
| VIII. Product transformation                                                       | S10  |
| IX. Mechanism study                                                                | S15  |
| X. References                                                                      | S17  |
| XI. Data of products                                                               | S18  |

## I. Materials and Methods

All commercial materials (Alfa Aesar, Aladdin, J&K Chemical LTD.) were used without further purification. All solvents were analytical grade. The  $^1\text{H}$ -NMR and  $^{13}\text{C}$ -NMR spectra were recorded on a Bruker 400 MHz spectrometer in  $\text{CD}_3\text{OD}$ ,  $\text{DMSO-d}_6$  or  $\text{CDCl}_3$  using TMS or solvent peak as a standard. All  $^{13}\text{C}$ -NMR spectra were recorded with complete proton decoupling. Low-resolution mass spectral analyses were performed with a Waters AQUITY UPLC<sup>TM</sup>/MS. All reactions were carried out in oven-dried sealed tube. Analytical TLC was performed on Yantai Chemical Industry Research Institute silica gel 60 F254 plates and flash column chromatography was performed on Qingdao Haiyang Chemical Co. Ltd silica gel 60 (200-300 mesh). The rotavapor was BUCHI's Rotavapor R-3.

## II. Density functional theory (DFT) calculation

### 1,computational details:

All the calculations were carried out with the Gaussian 09 package.<sup>1</sup> Geometry optimizations were performed with B3LYP<sup>2</sup>. LANL2DZ+f (1.472 for Pd) basis set<sup>3</sup> with effective core potential (ECP) was used for metal centers, and the 6-31G (d) basis set<sup>4</sup> was used for other atoms. Frequency was calculated at the same level of theory to obtain zero-point energy (ZPE) corrections and to verify the stationary points to be minima. Because the M06<sup>5</sup> functional includes noncovalent interactions and gives refined energies for organo transition metal systems, single-point energies were conducted by using M06/SDD<sup>6</sup>-6-311++G(d,p)<sup>7</sup>. Solvation effects were evaluated with SMD solvation model.<sup>8</sup> Acetic acid was chosen as the solvent. The relative energies with ZPE corrections and free energies (at 298.15K) are in kcal/mol.

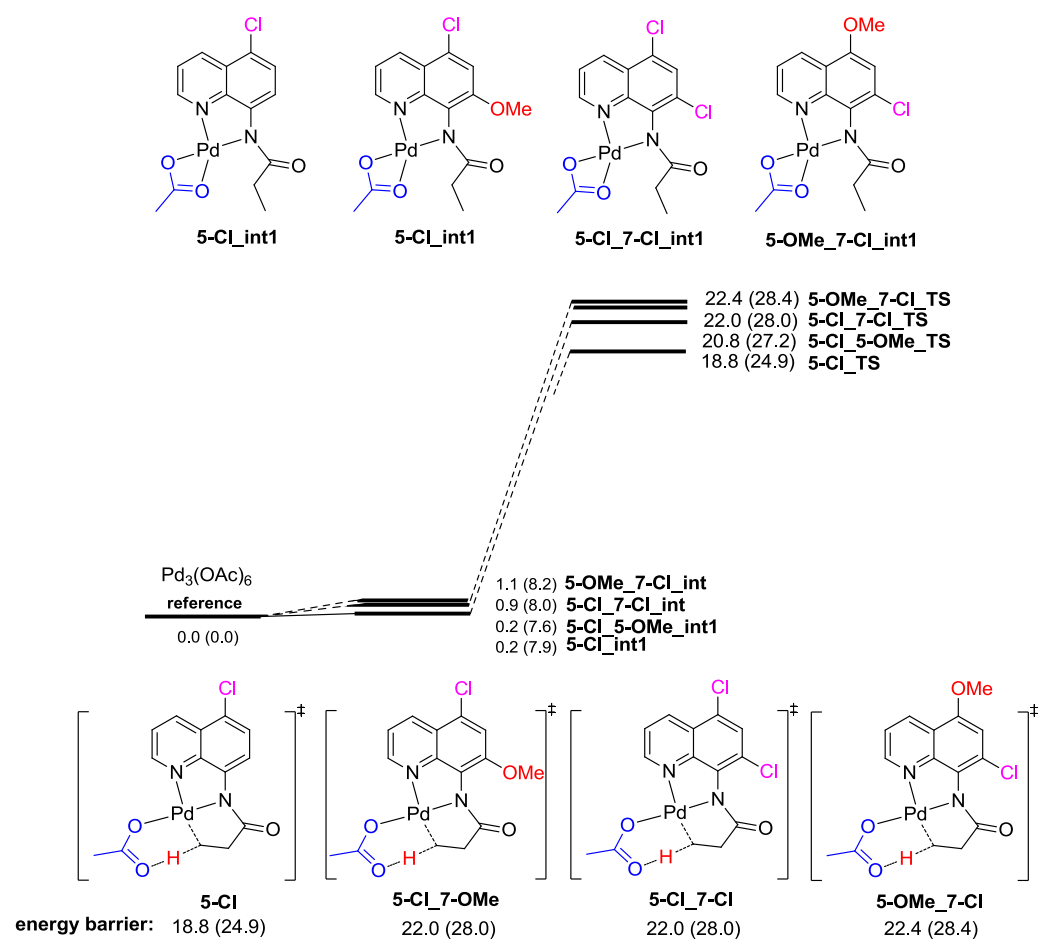

**Figure S1.** Potential energy surface (free energies and electronic energies in parentheses) and energy barriers for the Pd catalyzed C-H activation with different kinds of bidentate directing groups (in kcal/mol).

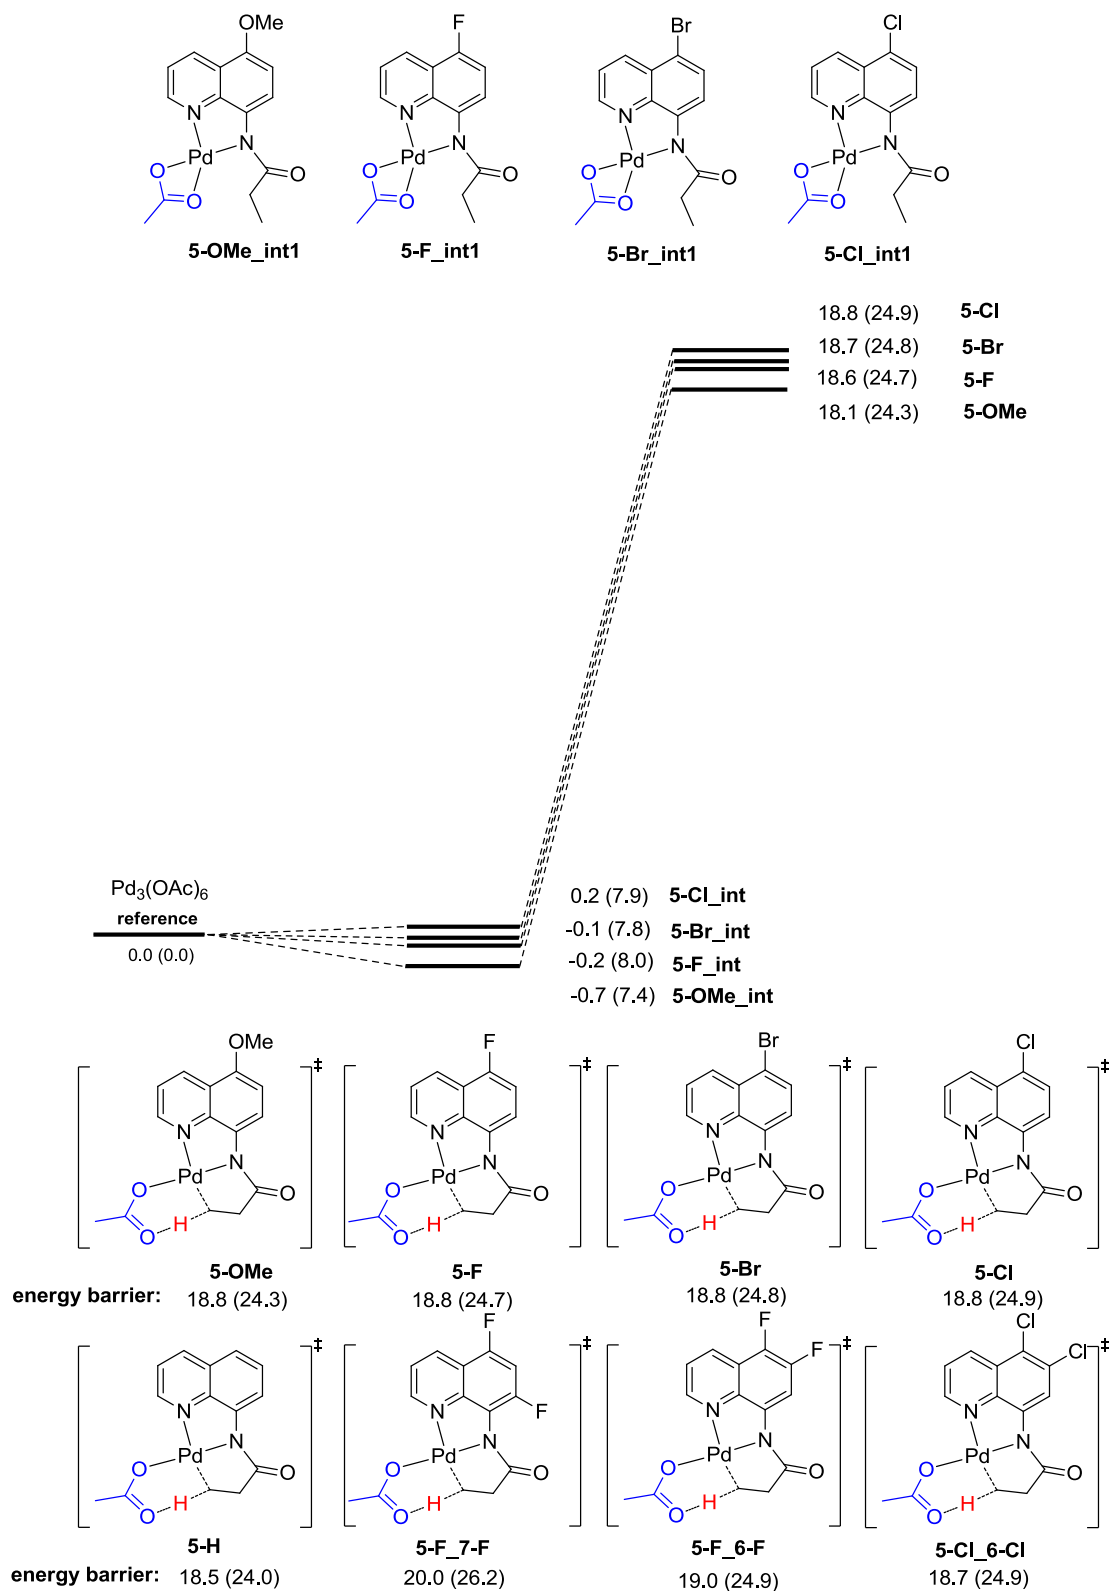

**Figure S2.** Potential energy surface (free energies and electronic energies in parentheses) and energy barriers for the Pd catalyzed C(sp<sup>3</sup>)-H activation with different substituent pattern directing groups (in kcal/mol).

## II. Directing groups synthesis and screening

a) Different directing groups were synthesized by following procedures.

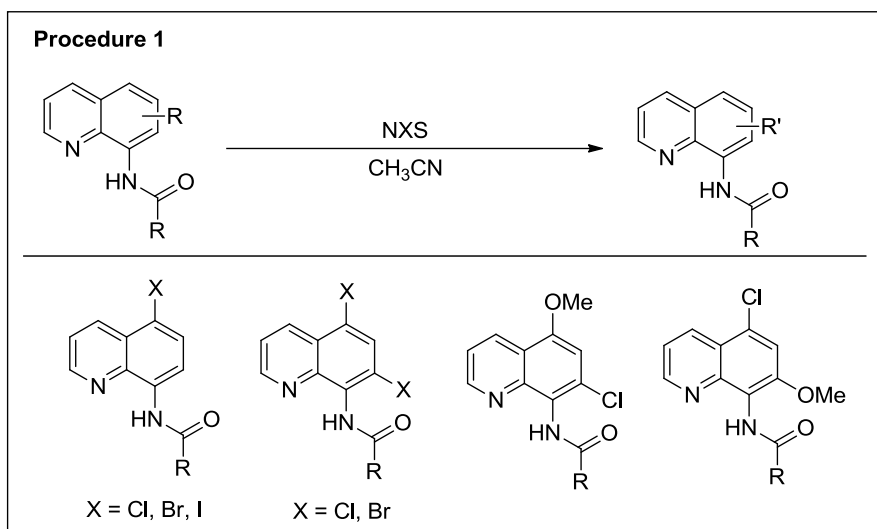

Example

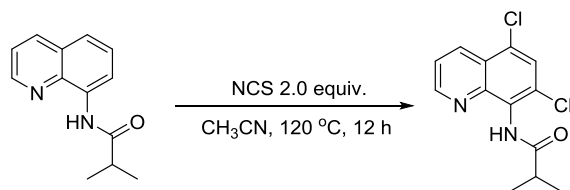

To a 10 mL sealed tube were added N-(quinolin-8-yl)isobutyramide (214 mg, 1.0 mmol), NCS (267 mg, 2.0 mmol) and  $\text{CH}_3\text{CN}$  (4 mL). The tube was sealed and heated at 120 °C for 12 h. The reaction mixture was cooled to RT,  $\text{H}_2\text{O}$  was added to dilute the reaction mixture. Then reaction mixture was extracted by DCM for three times, the organic layer dried over anhydrous  $\text{Na}_2\text{SO}_4$  and concentrated on rotavapor under reduced pressure. Finally, the residue was purified by silica gel column chromatography (Petroleum ether:Ethylacetate = 2:1) to give the desired product.

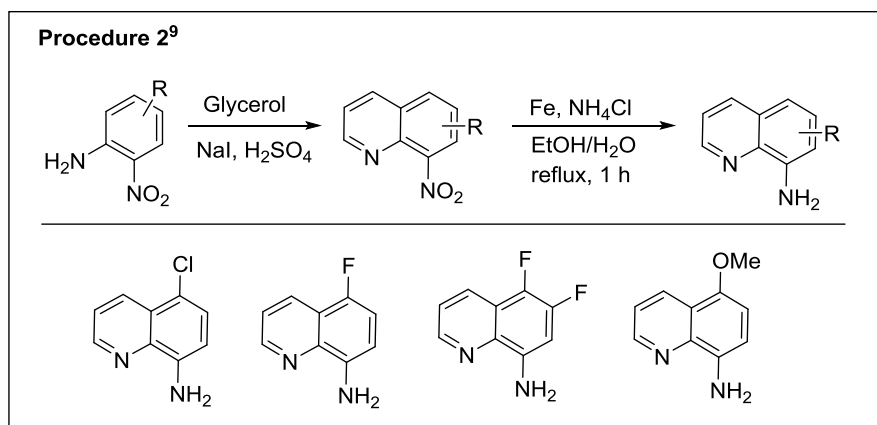

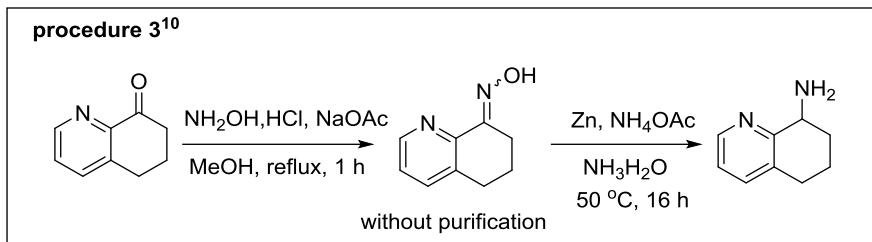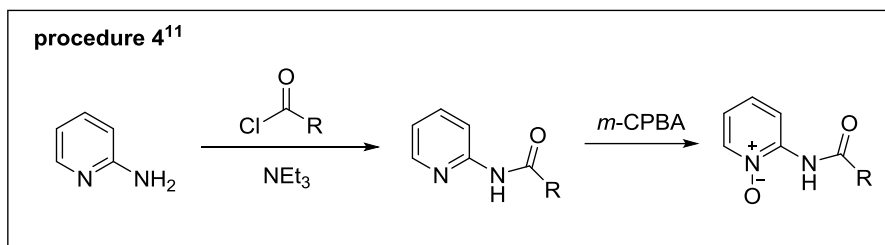

### b) Halogenation reactivity of different directing groups

| substrates | Conditions <sup>a</sup> Pd(OAc) <sub>2</sub> 10% | Halogenated Products (NMR yield) |
|------------|--------------------------------------------------|----------------------------------|
|            | NCS 2.0 eq, AcOH, 80 °C, 3.5 h                   | Cl trace                         |
|            | NCS 2.0 eq, AcOH, rt, 12 h, 50 °C, 1 h           | NR                               |
|            | NBS 2.0 eq, AcOH, 80 °C, 6 h                     | NR                               |
|            | NBS 2.0 eq, AcOH, 80 °C, 12 h                    | Br 20%                           |
|            | NCS 2.0 eq, CH <sub>3</sub> CN, 80 °C, 12 h      | Mono-Cl 15%; di-Cl 11%           |
|            | NCS 1.5 eq, AcOH (2.5eq), DCE, 80 °C, 12 h       | Mono-Cl 24%                      |
|            | Cl-1 1.5 eq, AcOH (2.5 eq), DCE, 80 °C, 12 h     | Mono-Cl 20%                      |
|            | NCS 2.0 eq, AcOH, 80 °C, 12 h                    | Mono-Cl 40%; di-Cl 20%           |
|            | NCS 2.0 eq, AcOH, 120 °C, 2 h                    | Cl 28%                           |

|                                                                                                        |                                 |                                                 |
|--------------------------------------------------------------------------------------------------------|---------------------------------|-------------------------------------------------|
| 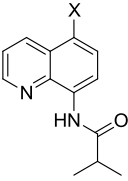 <p>X = Cl, Br, I</p> | NIS (2.0 eq), AcOH, 25 °C, 48 h | I 60%                                           |
|                       | NCS 1.1 eq, AcOH, 25 °C, 24 h   | Mono-Cl 32%; di-Cl 25%                          |
|                                                                                                        | NIS 1.1 eq, AcOH, 25 °C, 24 h   | I trace                                         |
|                       | NCS 2.0eq, AcOH, 50 °C, 2.5 h   | Cl, Conversion ratio:<br>Mono-Cl 20%; di-Cl 70% |
|                      | NCS 2.0 eq, AcOH, 80 °C, 3 h    | Tri-Cl 36%; Di-Cl 16%; Mono-Cl 15%              |
|                                                                                                        | NBS 3.0 eq, AcOH, 80 °C, 10 h   | Br 10%                                          |
|                     | NCS 2.0 eq, AcOH, 80 °C, 15 h   | Cl Mono 14%                                     |
|                     | NCS 3.0 eq, AcOH, 80 °C, 12 h   | Cl trace                                        |
|                                                                                                        | NBS 3.0 eq, AcOH, 80 °C, 12 h   | Br trace                                        |
|                     | NBS 2.0 eq, AcOH, rt, 24 h      | Br 50%                                          |
|                     | NCS 2.0 eq, AcOH, 25 °C, 14 h   | Trace                                           |

|                                                                                   |                               |       |
|-----------------------------------------------------------------------------------|-------------------------------|-------|
| 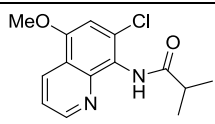 | NBS 2.0 eq, AcOH, 25 °C, 12 h | trace |
|  | NCS (2.0eq), AcOH, rt, 24 h   | trace |

- a. Reaction was carried out following General procedure for Pd-catalyzed C(sp<sup>3</sup>)-H halogenation reaction

## II. Optimization of reaction conditions

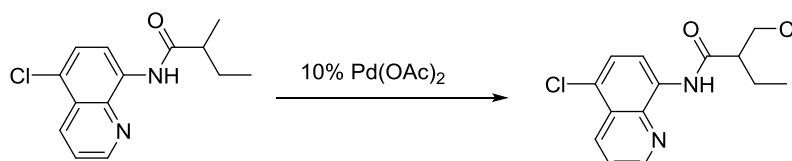

| Entry | conditions                                        | NMR yield(%) <sup>a</sup>                |
|-------|---------------------------------------------------|------------------------------------------|
| 1     | NCS 1.5 eq, TFA , 50 °C, 3.5 h                    | 7                                        |
| 2     | NCS 1.5 eq, CH <sub>3</sub> CN , 50 °C, 3.5 h     | 9                                        |
| 3     | NCS 1.5 eq, AcOH/Ac <sub>2</sub> O, 50 °C, 3.5 h  | 55                                       |
| 4     | NCS 1.5 eq, AcOH/CH <sub>3</sub> CN, 50 °C, 3.5 h | 55                                       |
| 5     | NCS 1.5 eq, propanoic acid, 35 °C, 8 h            | 65                                       |
| 6     | NCS 1.5 eq, AcOH/DCE, 50 °C, 3.5 h                | 17                                       |
| 7     | Cl-1 2.0 eq, AcOH, 50 °C, 3.5 h                   | 38                                       |
| 8     | Cl-2 2.0 eq, AcOH, 50 °C, 3.5 h                   | 28                                       |
| 9     | Cl-3 2.0 eq, AcOH, 50 °C, 3.5 h                   | NR <sup>b</sup>                          |
| 10    | Cl-4 2.0 eq, AcOH, 50 °C, 3.5 h                   | NR <sup>b</sup>                          |
| 11    | NCS 1.5 eq, AcOH, 50 °C, 3.5 h                    | 67                                       |
| 12    | NCS 2.0 eq, AcOH, 50 °C, 5 h                      | 57(54 <sup>c</sup> )                     |
| 13    | NCS 2.0 eq, AcOH, RT, 35 h                        | 71(70 <sup>c</sup> )(77 <sup>c,d</sup> ) |
| 14    | NCS 1.5 eq, AcOH, RT, 35 h                        | 75                                       |
| 15    | NCS 1.5 eq, acid 1, 35 °C, 8 h                    | 62                                       |
| 16    | NCS 1.5 eq, acid 2, 35 °C, 8 h                    | 18                                       |
| 17    | NCS 1.5 eq, acid 3, 35 °C, 8 h                    | 68                                       |

a. 0.1mmol scale, less than 10% methylene C-H chlorination was observed by H-NMR b, chlorination happens at sp<sup>2</sup> position c. isolated yield d. 0.5mmol scale

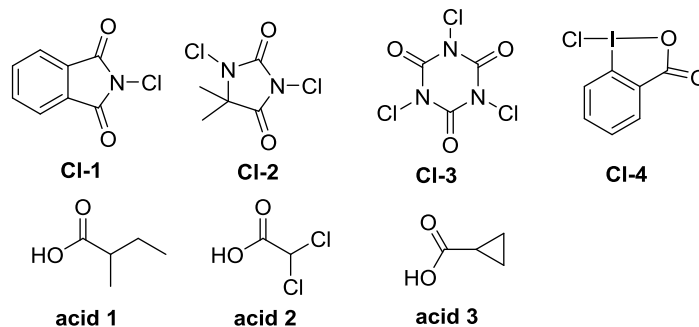



## IV. Substrates preparation

### General procedure 1

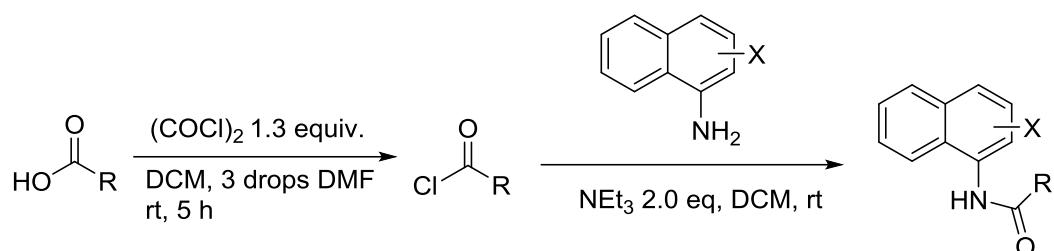

To a solution of the acid in DCM, 1.3 equiv. of oxalyl chloride and 1-2 drops of DMF were added. The mixture was allowed to stir at rt for 5 h. Then the mixture was concentrated to remove the solvent and excess oxalyl chloride to afford the crude acyl chloride, which was subsequently dissolved in DCM followed by addition of 1.0 equiv of directing group and 2.0 equiv of  $\text{Et}_3\text{N}$  in ice-water bath. The mixture was stirred for 5 h (monitored by TLC). Then water was added to quench the reaction. The reaction mixture was extracted with DCM for 3 times. The combined organic layer was dried over  $\text{Na}_2\text{SO}_4$ . After filtration and concentration, the residue was purified by column chromatography to afford the pure compound, which was confirmed by NMR and LC-MS analysis.

### General procedure 2

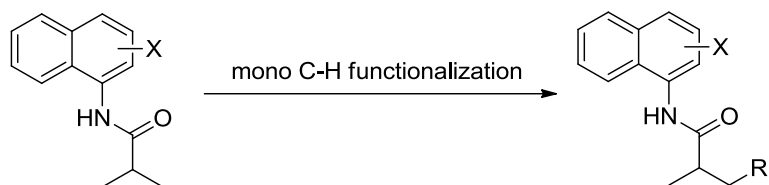

Referring to recent published papers<sup>12</sup>, Pd-catalyzed  $\text{C}(\text{sp}^3)\text{-H}$  functionalization methods were applied with isobutyric acid derivative as substrate.

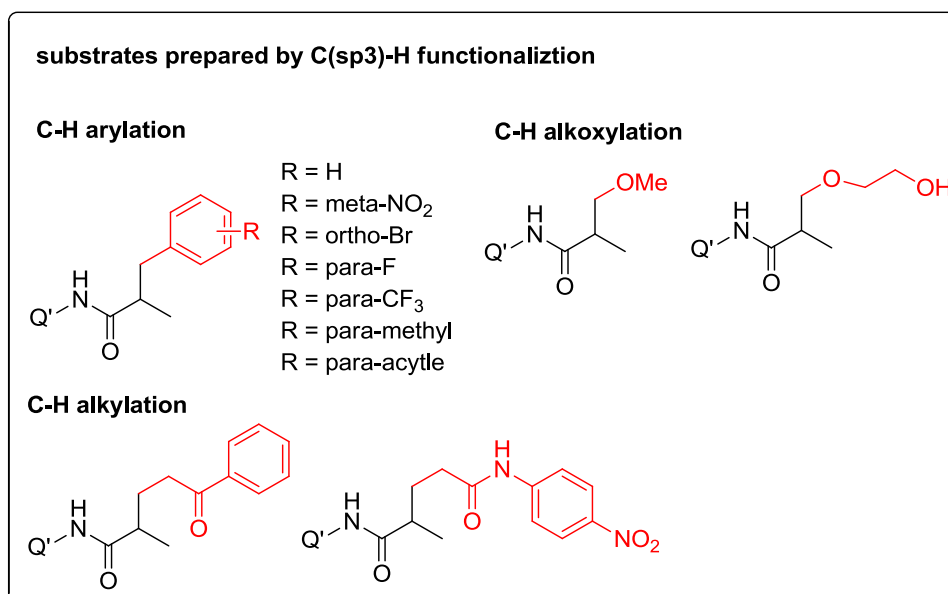

## V. General procedure for Pd-catalyzed C(sp<sup>3</sup>)-H halogenation reaction

To a 10ml round bottom flask were added amide (1.0 equiv.), Pd(OAc)<sub>2</sub> (0.1 equiv.), NXS (1.0-4.0 equiv.) and AcOH. The reaction was stirred at rt for 12-48 h or 50 °C for 1-4 h and monitored by TLC. Water was added to dilute the reaction mixture and NaHCO<sub>3</sub> was added to neutralize the reaction mixture. Then reaction mixture was extracted by DCM for three times, the organic layer dried over anhydrous Na<sub>2</sub>SO<sub>4</sub> and concentrated on rotavapor under reduced pressure. Finally, the residue was purified by silica gel column chromatography to give the desired product.

## VI. General procedure for Directing Group Removing

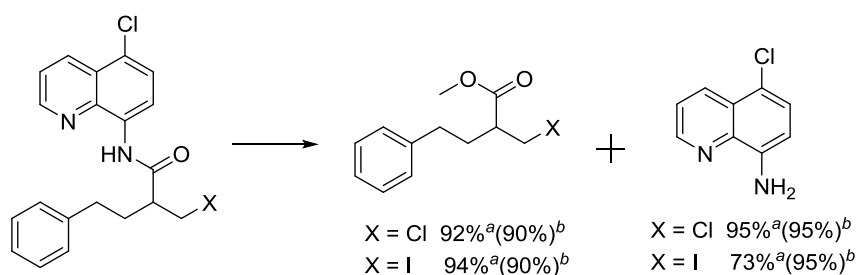

condition a: BF<sub>3</sub>.Et<sub>2</sub>O 5 equiv., MeOH, 100 °C, 24 h

condition b: con.H<sub>2</sub>SO<sub>4</sub> 5 equiv., MeOH, 100 °C, 20 h

To a 10 mL sealed tube were added halogenated product (1.0 equiv.), BF<sub>3</sub>.Et<sub>2</sub>O (5.0 equiv.) or concentrated H<sub>2</sub>SO<sub>4</sub> (5.0 equiv.) and MeOH (2 mL) were added. The tube was sealed and heated at 100 °C for 20-24 h. The reaction mixture was cooled to RT, H<sub>2</sub>O was added to dilute the reaction mixture. Then reaction mixture was extracted by DCM for three times, the organic layer dried over anhydrous Na<sub>2</sub>SO<sub>4</sub> and concentrated on rotavapor under reduced pressure. Finally, the residue was purified by silica gel column chromatography to give the desired product.

## VII. Product transformation

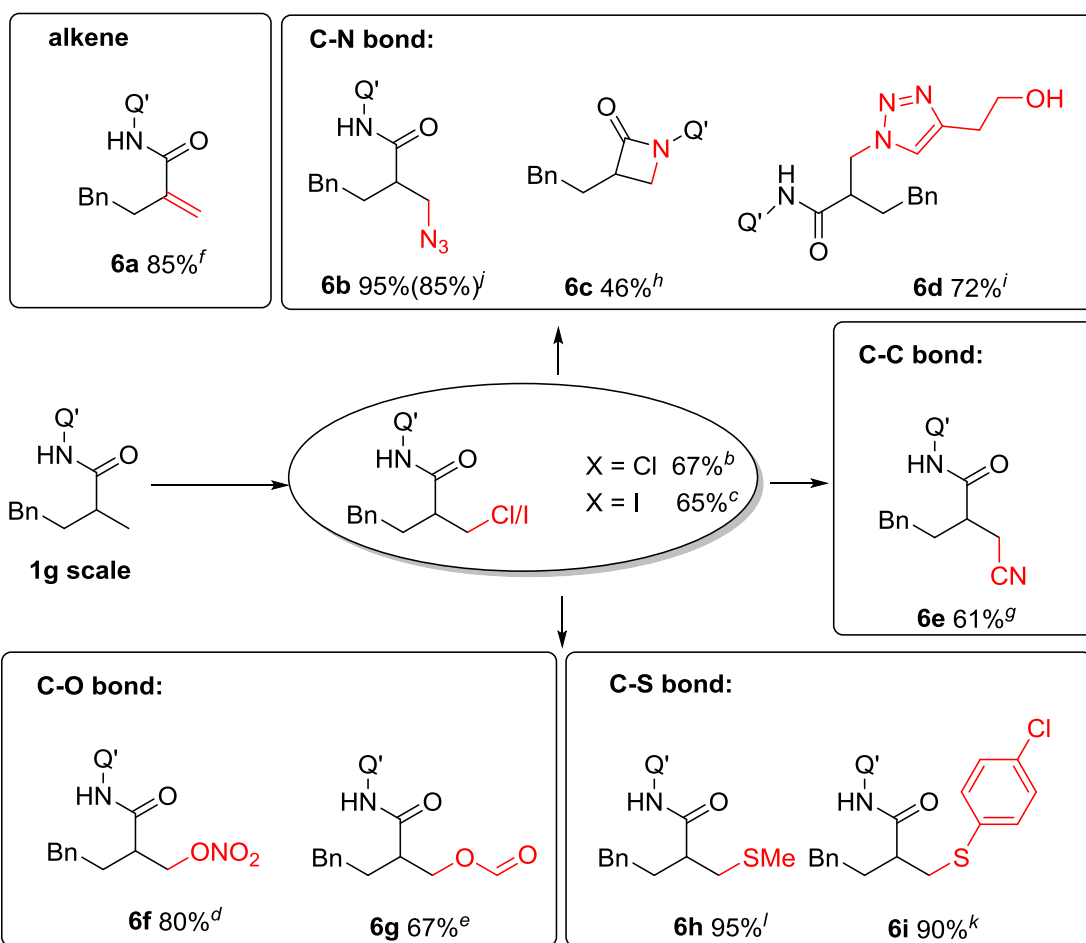

a) isolated yield. b) 10% mol Pd(OAc)<sub>2</sub>, 2.0equiv NCS, AcOH, rt, 48h c) 10% mol Pd(OAc)<sub>2</sub>, 2.0equiv NCS, AcOH, rt, 22h d) 2.0equiv AgNO<sub>3</sub>, 2.0equiv Cu(OAc)<sub>2</sub>, EtOH, rt, 0.5h e) 4.0equiv AgSCF<sub>3</sub>, DMF, 100°C, 1.5h f) 5.0equiv NaN<sub>3</sub>, DMF, rt, 1h g) 2.0equiv CuCN, 2.0equiv Cu(OAc)<sub>2</sub>, DMF, 100°C, 1.5h h) 2.0equiv NaSMe, DMF, rt, 0.5h i) 2.0equiv NaN<sub>3</sub>, 2.0equiv Cu(OAc)<sub>2</sub>, DMF, rt, 0.5h then 20% mol CuI, 40% mol L-ascorbate, 1.5 equiv K<sub>2</sub>CO<sub>3</sub>, 1.5equiv. but-3-yn-1-ol, MeOH/H<sub>2</sub>O, rt, 3h j) 2.0equiv NaN<sub>3</sub>, 2.0equiv Cu(OAc)<sub>2</sub>, DMF, rt, 0.5h k) 5.0 equiv 4-chlorobenzenethiol, DMF, 100 °C, 5 h l) 2.0equiv NaSMe, EtOH, rt, 0.5h

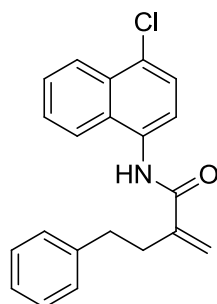

To a 10 ml round bottom flask were added I-substrate (0.1 mmol, 46.3 mg), NaN<sub>3</sub> (0.5 mmol, 32.5 mg), and DMF(0.5 mL). The reaction was stirred at rt for 1 h. Water was added to dilute the reaction mixture. Then reaction mixture was extracted by DCM for three times, the organic layer dried over anhydrous Na<sub>2</sub>SO<sub>4</sub> and concentrated on rotavapor under reduced pressure. The residue was purified by silical gel column chromatography (Petroleum ether:Ethylacetate = 15:1).

Finally, compound **6a** (28 mg, white solid) was isolated in 85% yield.

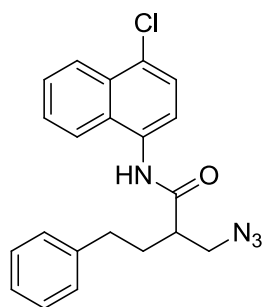

To a 10 ml round bottom flask were added iodinated substrate (0.1 mmol, 46.3 mg),  $\text{NaN}_3$  (0.2 mmol, 13 mg),  $\text{Cu}(\text{OAc})_2$  (0.2 mmol, 36 mg) and DMF(0.5 mL). The reaction was stirred at rt for 1 h. Water was added to dilute the reaction mixture. Then reaction mixture was extracted by DCM for three times, the organic layer dried over anhydrous  $\text{Na}_2\text{SO}_4$  and concentrated on rotavapor under reduced pressure. The residue was purified by silical gel column chromatography (Petroleum ether:Ethylacetate = 15:1). Finally, compound **6b** (36 mg, colorless oil) was isolated in 95% yield.

To a 10 ml round bottom flask were added chlorinated substrate (0.1 mmol, 37 mg),  $\text{NaN}_3$  (0.2 mmol, 13 mg),  $\text{Cu}(\text{OAc})_2$  (0.2 mmol, 36 mg) and DMF(0.5 mL). The reaction was stirred at 80 °C for 2.5 h. The reaction mixture was cooled to room temperature and water was added to dilute the reaction mixture. Then reaction mixture was extracted by DCM for three times, the organic layer dried over anhydrous  $\text{Na}_2\text{SO}_4$  and concentrated on rotavapor under reduced pressure. The residue was purified by silical gel column chromatography (Petroleum ether:Ethylacetate = 15:1). Finally, compound **6b** (32 mg, colorless oil) was isolated in 85% yield.

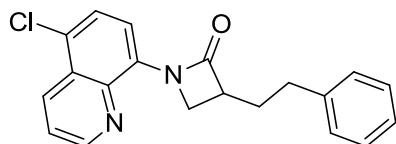

To a 10 ml round bottom flask were added iodinated substrate (0.1 mmol, 46.3 mg), NaSMe (15 wt% in  $\text{H}_2\text{O}$ ) (0.1 mmol, 48 mg), and DMF (1 mL). The reaction was stirred at rt for 0.5 h. Water was added to dilute the reaction mixture. Then reaction mixture was extracted by DCM for three times, the organic layer dried over anhydrous  $\text{Na}_2\text{SO}_4$  and concentrated on rotavapor under reduced pressure. The residue was purified by silical gel column chromatography (Petroleum ether:Ethylacetate = 25:1). Finally, compound **6c** (15 mg, ) was isolated in 46% yield.

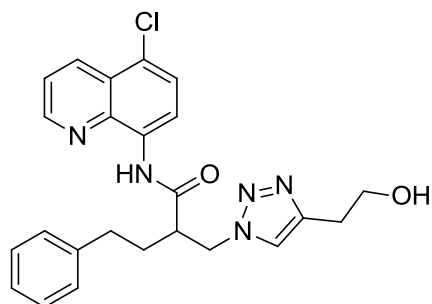

To a 10 ml round bottom flask were added iodinated substrate (0.1 mmol, 46.3 mg),  $\text{NaN}_3$  (0.2 mmol, 13 mg),  $\text{Cu}(\text{OAc})_2$  (0.2 mmol, 36 mg) and DMF(0.5 mL). The reaction was stirred at rt for 1 h. Water was added to dilute the reaction mixture. Then reaction mixture was extracted by DCM

for three times, the organic layer dried over anhydrous  $\text{Na}_2\text{SO}_4$  and concentrated on rotavapor under reduced pressure. To the residue was added  $\text{CuI}$  (0.02 mmol, 3.8 mg), L-ascorbate (0.04 mmol, 7.9 mg),  $\text{K}_2\text{CO}_3$  (0.15 mmol, 21 mg), but-3-yn-1-ol (0.15 mmol, 11.4  $\mu\text{L}$ ) and  $\text{MeOH}/\text{H}_2\text{O}$  (0.5 ml / 0.5 ml). The reaction was stirred at rt for 3 h. Water was added to dilute the reaction mixture. Then reaction mixture was extracted by DCM for three times, the organic layer dried over anhydrous  $\text{Na}_2\text{SO}_4$  and concentrated on rotavapor under reduced pressure. The residue purified by silical gel column chromatography (DCM:MeOH = 20:1). Finally, compound **6d** (32 mg, yellow oil) was isolated in 72% yield.

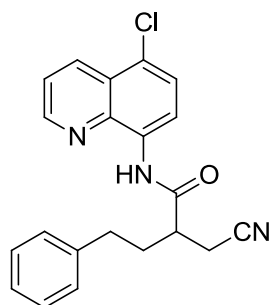

To a 10 ml round bottom flask were added iodinated substrate (0.05 mmol, 23 mg),  $\text{CuCN}$  (0.2 mmol, 13 mg),  $\text{Cu}(\text{OAc})_2$  (0.2 mmol, 36 mg) and  $\text{DMF}$  (0.5 mL). The reaction was stirred at rt for 1 h. Water was added to dilute the reaction mixture. Then reaction mixture was extracted by DCM for three times, the organic layer dried over anhydrous  $\text{Na}_2\text{SO}_4$  and concentrated on rotavapor under reduced pressure. The residue was purified by silical gel column chromatography (Petroleum ether:Ethylacetate = 15:1). Finally, compound **6e** (10.6 mg, yellow oil) was isolated in 56% yield.

To a 10 ml round bottom flask were added chlorinated substrate (0.1 mmol, 37 mg),  $\text{NaN}_3$  (0.2 mmol, 13 mg),  $\text{Cu}(\text{OAc})_2$  (0.2 mmol, 36 mg) and  $\text{DMF}$  (0.5 mL). The reaction was stirred at 80  $^\circ\text{C}$  for 2.5 h. The reaction mixture was cooled to room temperature and water was added to dilute the reaction mixture. Then reaction mixture was extracted by DCM for three times, the organic layer dried over anhydrous  $\text{Na}_2\text{SO}_4$  and concentrated on rotavapor under reduced pressure. The residue was purified by silical gel column chromatography (Petroleum ether:Ethylacetate = 5:1). Finally, compound **6e** (11 mg, yellow oil) was isolated in 61% yield.

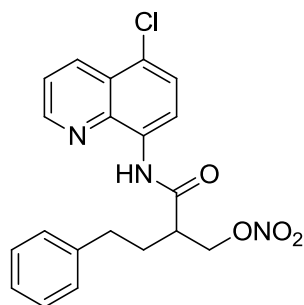

To a 10 ml round bottom flask were added iodinated substrate (0.05 mmol, 23 mg),  $\text{AgNO}_3$  (0.1 mmol, 17 mg),  $\text{Cu}(\text{OAc})_2$  (0.1 mmol, 18 mg) and  $\text{EtOH}$  (0.5 mL). The reaction was stirred at rt for 0.5 h. Water was added to dilute the reaction mixture. Then reaction mixture was extracted by DCM for three times, the organic layer dried over anhydrous  $\text{Na}_2\text{SO}_4$  and concentrated on rotavapor under reduced pressure. The residue was purified by silical gel column chromatography (Petroleum ether:Ethylacetate = 10:1). Finally, compound **6f** (16 mg) was isolated in 80% yield.

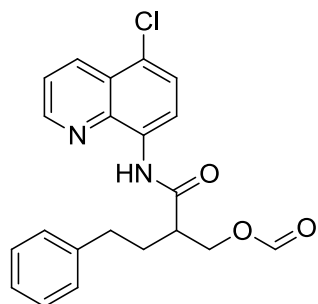

To a 10 ml round bottom flask were added iodinated substrate (0.05 mmol, 23 mg),  $\text{AgSCF}_3$  (0.2 mmol, 42 mg), and DMF (1 mL). The reaction was stirred at 100 °C for 1.5 h. The reaction mixture was cooled to room temperature and water was added to dilute the reaction mixture. Then reaction mixture was extracted by DCM for three times, the organic layer dried over anhydrous  $\text{Na}_2\text{SO}_4$  and concentrated on rotavapor under reduced pressure. The residue was purified by silical gel column chromatography (Petroleum ether:Ethylacetate = 10:1). Finally, compound **6g** (13 mg, colorless oil) was isolated in 67% yield.

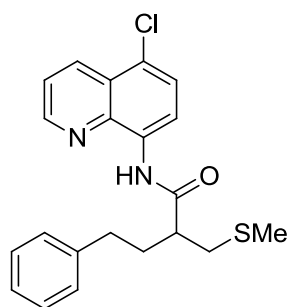

To a 10ml round bottom flask were added iodinated substrate (0.05 mmol, 23 mg),  $\text{NaSMe}$  (15 wt% in  $\text{H}_2\text{O}$ ) (0.1 mmol, 48 mg), and EtOH (2 mL).. The reaction was stirred at rt for 0.5 h. Water was added to dilute the reaction mixture. Then reaction mixture was extracted by DCM for three times, the organic layer dried over anhydrous  $\text{Na}_2\text{SO}_4$  and concentrated on rotavapor under reduced pressure. The residue was purified by silical gel column chromatography (Petroleum ether:Ethylacetate = 10:1). Finally, compound **6h** (18 mg, ) was isolated in 95% yield.

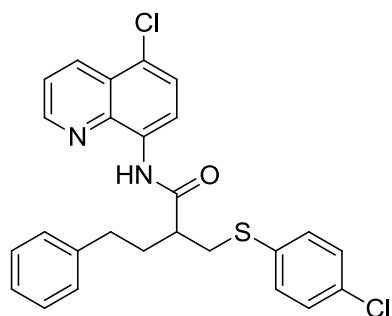

To a 10 ml round bottom flask were added iodinated substrate (0.05 mmol, 23 mg), 4-chlorobenzenethiol (0.25 mmol, 36 mg), and DMF (1 mL). The reaction was stirred at 100 °C for 5 h. The reaction mixture was cooled to room temperature and water was added to dilute the reaction mixture. Then reaction mixture was extracted by DCM for three times, the organic layer dried over anhydrous  $\text{Na}_2\text{SO}_4$  and concentrated on rotavapor under reduced pressure. The residue was purified by silical gel column chromatography (Petroleum ether:Ethylacetate = 20:1). Finally, compound **6i** (22 mg, colorless oil) was isolated in 90% yield.

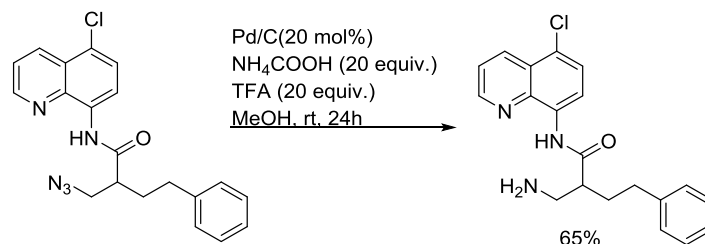

To a 10ml round bottom flask were added 6b (0.05 mmol, 19 mg), Pd/C (20%, 3.8 mg), NH<sub>4</sub>COOH (1.0 mmol, 63 mg) and MeOH (1 mL). The reaction was stirred at rt for 24 h. The reaction mixture was filtrated and the filter liquor was concentrated on rotavapor under reduced pressure. The residue was purified by silical gel column chromatography (DCM:MeOH = 20:1). Finally, compound **6i** (11 mg, colorless oil) was isolated in 65% yield.

To a 10 ml round bottom flask were added 6b (0.05 mmol, 19 mg), Pd/C (20%, 3.8 mg), NH<sub>4</sub>COOH (1.0 mmol, 63 mg) and MeOH (1 mL). The reaction was stirred at rt for 24 h. The reaction mixture was filtrated and the filter liquor was concentrated on rotavapor under reduced pressure. The residue was purified by silical gel column chromatography (DCM:MeOH = 20:1). Finally, compound **6i** (11 mg, colorless oil) was isolated in 65% yield.

<sup>1</sup>H-NMR (400 MHz, CDCl<sub>3</sub>) δ (ppm) 10.17 (s, 1H), 8.86-8.85 (m, 1H), 8.73 (d, *J* = 8.4 Hz, 1H), 8.56 (d, *J* = 8.4 Hz, H), 7.61-7.56 (m, 2H), 7.28-7.18 (m, 5H), 3.16-3.14 (m, 1H), 3.03-3.01 (m, 1H), 2.78-2.65 (m, 3H), 2.51 (br, 2H), 2.20-2.19 (m, 1H), 1.91-1.90 (m, 1H); <sup>13</sup>C-NMR (100 MHz, CDCl<sub>3</sub>) δ (ppm) 173.7, 148.9, 141.5, 139.3, 133.9, 133.5, 128.6, 127.3, 126.2, 126.1, 122.5, 117.0, 50.8, 44.5, 33.7, 32.1; LRMS (ESI) calcd for C<sub>20</sub>H<sub>20</sub>ClN<sub>3</sub>O [M+H]<sup>+</sup>: 354.13, found 354.07

## VIII. Mechanism study

### a) General procedure for substrate deuteration studies at room temperature

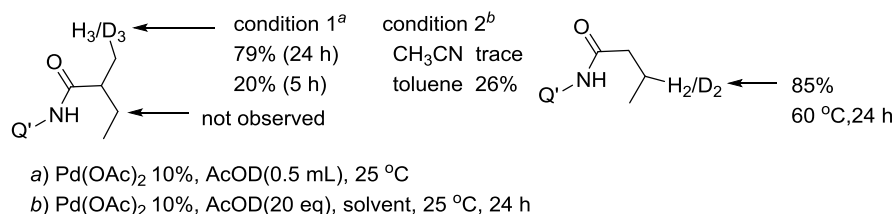

To a 10 ml round bottom flask were added amide (1.0 equiv.), Pd(OAc)<sub>2</sub> (10%) and solvent system (0.5 mL). The reaction was stirred at 25-60 °C for 5-24 h. Water was added to dilute the reaction mixture and NaHCO<sub>3</sub> was added to neutralize the reaction mixture. Then reaction mixture was extracted by DCM for three times, the organic layer dried over anhydrous Na<sub>2</sub>SO<sub>4</sub> and concentrated on rotavapor under reduced pressure. Finally, the residue was purified by silica gel column chromatography to give the desired product. Deuteration ratio was analyzed by <sup>1</sup>H-NMR.

### b) KIE study

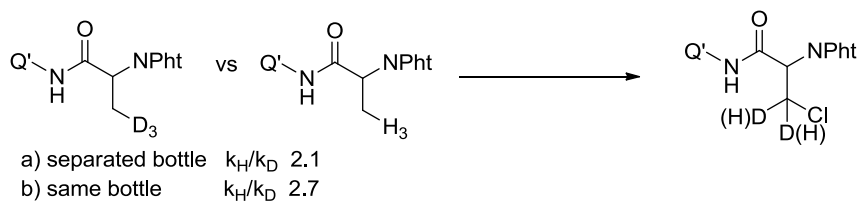

N-(5-chloroquinolin-8-yl)-2-(1,3-dioxisoindolin-2-yl)propanamide and its deuterated analogue (0.05 mmol) were added to two 10 ml round bottom flasks separately followed by NCS (13.3 mg, 0.1 mmol), Pd(OAc)<sub>2</sub> (1.1 mg, 0.005 mmol) and AcOH (0.5 ml). The reaction mixture was stirred for 3 h. Water was added to dilute the reaction mixture and NaHCO<sub>3</sub> was added to neutralize the reaction mixture. Then reaction mixture was extracted by DCM for three times, the organic layer dried over anhydrous Na<sub>2</sub>SO<sub>4</sub> and concentrated on rotavapor under reduced pressure. Finally, the residue was purified by silica gel column chromatography. 3-chloro-N-(5-chloroquinolin-8-yl)-2-(1,3-dioxisoindolin-2-yl)propanamide and deuterated analogue was obtained in 45% and 21% NMR yield with p-nitrobenzaldehyde as internal standard. <sup>1</sup>H-NMR shows  $k_H/k_D = 2.1:1$ .

N-(5-chloroquinolin-8-yl)-2-(1,3-dioxisoindolin-2-yl)propanamide and its deuterated analogue (0.05 mmol) were added to 10ml round bottom flask followed by NCS (13.3 mg, 0.1 mmol), Pd(OAc)<sub>2</sub> (1.1 mg, 0.005 mmol) and AcOH (0.5 ml). The reaction mixture was stirred for 3h. Water was added to dilute the reaction mixture and NaHCO<sub>3</sub> was added to neutralize the reaction mixture. Then reaction mixture was extracted by DCM for three times, the organic layer dried over anhydrous Na<sub>2</sub>SO<sub>4</sub> and concentrated on rotavapor under reduced pressure. Finally, the residue was purified by silica gel column chromatography. <sup>1</sup>H-NMR shows  $k_H/k_D = 2.77:1$

### c) Synthesis and reactivity of cyclopalladium

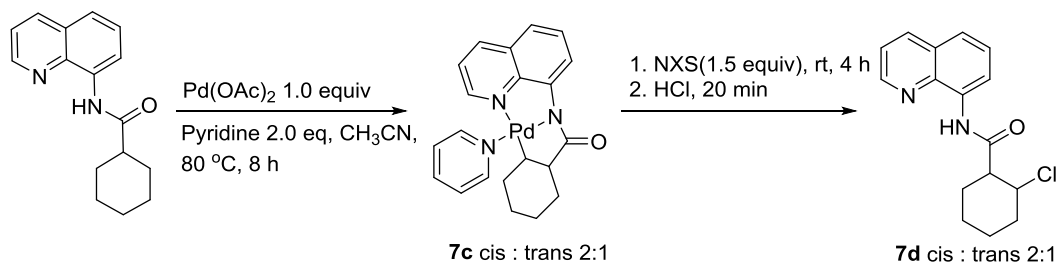

To a 15 ml sealed-tube were added N-(quinolin-8-yl)cyclohexanecarboxamide (127 mg, 0.50 mmol), Pd(OAc)<sub>2</sub>(112 mg, 0.5 mmol), pyridine (80 ul, 1.0 mmol) and CH<sub>3</sub>CN(4 mL). The reaction mixture was stirred at 60 °C for 12 h. The reaction mixture was cooled to RT and filtrated to get yellow solid, filtrate was concentrated on rotavapor under reduced pressure and purified by silica gel column chromatography (Petroleum ether: Ethyl acetate = 1:2), two portions were combined affording 192 mg (88%,yellow solid) of **7c**.

To a 5 ml round bottom flask were added palladium complex (44 mg, 0.1 mmol), NCS (16 mg, 0.12 mmol) and CH<sub>3</sub>CN (1 mL). The mixture was stirred at rt for 4 h. Concentrated HCl (0.5 mL) was added and the mixture was stirred for another 20 min to remove the palladium. Dichloromethane was added to dilute the reaction mixture and saturated aqueous NaHCO<sub>3</sub> was added to wash the reaction mixture. Then the organic layer was dried over anhydrous Na<sub>2</sub>SO<sub>4</sub> and concentrated on rotavapor under reduced pressure. The residue was purified by silical gel column chromatography (Petroleum ether:Ethylacetate = 15:1). Finally, compound **7d(cis)** (17 mg, colourless oil) and **7d(cis)** (8 mg, colourless oil) was isolated in 90% yield.



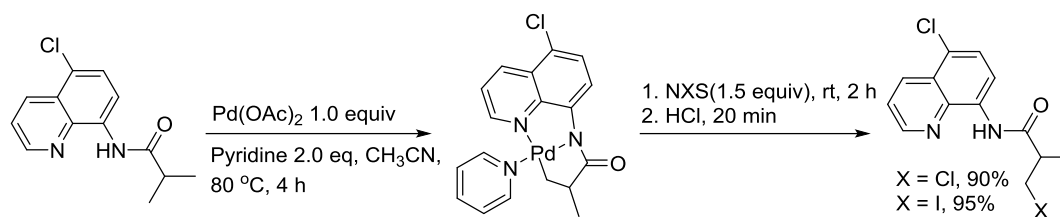

To a 15 ml sealed-tube were added N-(5-chloroquinolin-8-yl)isobutyramide (124 mg, 0.5 mmol), Pd(OAc)<sub>2</sub> (112 mg, 0.5 mmol), pyridine (80  $\mu$ L, 1.0 mmol) and CH<sub>3</sub>CN (5 ml). The tube was sealed and heated at 80 °C for 4 h. The reaction mixture was cooled to RT and concentrated on rotavapor under reduced pressure. Then the palladium complexes were purified by silica gel column chromatography (Ethylacetate). Finally, complex ( **7e** ) (18 mg, yellow solid) was isolated in 95% yield.

To a 5 ml round bottom flask were added palladium complex (22 mg, 0.05 mmol), NCS (10 mg, 0.075 mmol) and CH<sub>3</sub>CN (1 mL). The mixture was stirred at rt for 2 h. Concentrated HCl (0.5 mL) was added and the mixture was stirred for another 20 min to remove the palladium. Dichloromethane was added to dilute the reaction mixture and saturated aqueous NaHCO<sub>3</sub> was added to wash the reaction mixture. Then the organic layer was dried over anhydrous Na<sub>2</sub>SO<sub>4</sub> and concentrated on rotavapor under reduced pressure. The residue was purified by silica gel column chromatography (Petroleum ether:Ethylacetate = 15:1). Finally, compound ( **3c1** ) (13 mg, white solid) was isolated in 90% yield.

To a 5 ml round bottom flask were added palladium complex (22 mg, 0.05 mmol), NIS (17 mg, 0.075 mmol) and CH<sub>3</sub>CN (1 mL). The mixture was stirred at rt for 2 h. Concentrated HCl (0.5 mL) was added and the mixture was stirred for another 20 min to remove the palladium. Dichloromethane was added to dilute the reaction mixture and saturated aqueous NaHCO<sub>3</sub> was added to wash the reaction mixture. Then the organic layer was dried over anhydrous Na<sub>2</sub>SO<sub>4</sub> and concentrated on rotavapor under reduced pressure. The residue was purified by silica gel column chromatography (Petroleum ether:Ethylacetate = 15:1). Finally, compound ( **7f** ) (18 mg, white solid) was isolated in 95% yield.

## IX Reference

- Gaussian 09, Revision A.02, M. J. Frisch, G. W. Trucks, H. B. Schlegel, G. E. Scuseria, M. A. Robb, J. R. Cheeseman, G. Scalmani, V. Barone, B. Mennucci, G. A. Petersson, H. Nakatsuji, M. Caricato, X. Li, H. P. Hratchian, A. F. Izmaylov, J. Bloino, G. Zheng, J. L. Sonnenberg, M. Hada, M. Ehara, K. Toyota, R. Fukuda, J. Hasegawa, M. Ishida, T. Nakajima, Y. Honda, O. Kitao, H. Nakai, T. Vreven, J. A. Montgomery, Jr., J. E. Peralta, F. Ogliaro, M. Bearpark, J. J. Heyd, E. Brothers, K. N. Kudin, V. N. Staroverov, R. Kobayashi, J. Normand, K. Raghavachari, A. Rendell, J. C. Burant, S. S. Iyengar, J. Tomasi, M. Cossi, N. Rega, J. M. Millam, M. Klene, J. E. Knox, J. B. Cross, V. Bakken, C. Adamo, J. Jaramillo, R. Gomperts, R. E. Stratmann, O. Yazyev, A. J. Austin, R. Cammi, C. Pomelli, J. W. Ochterski, R. L. Martin, K. Morokuma, V. G. Zakrzewski, G. A. Voth, P. Salvador, J. J. Dannenberg, S. Dapprich, A. D. Daniels, O. Farkas, J. B. Foresman, J. V. Ortiz, J. Cioslowski, and D. J. Fox, Gaussian, Inc., Wallingford CT, 2009.
- (a) Becke, A. D. J. Chem. Phys. 1993, 98, 5648. (b) Lee, C.; Yang, W.; Parr, R. G. Phys. Rev. B 1988, 37, 785. (c) Becke, A. D. J. Chem. Phys. 1993, 98, 1372. (d) Stephens, P. J.; Devlin, F. J.; Chabalowski, C. F.; Frisch, M. J. J. Phys. Chem. 1994, 98, 1623.

3. (a) Hay, P. J.; Wadt, W. R. J. Chem. Phys. 1985, 82, 299. (b) Roy, L. E.; Hay, P. J.; Martin, R. L. J. Chem. Theory Comput. 2008, 4, 1029. (c) Ehlers, A. W.; Böhme, M.; Dapprich, S.; Gobbi, A.; Höllwarth, A.; Jonas, V.; Köhler, K. F.; Stegmann, R.; Veldkamp, A.; Frenking, G. Chem. Phys. Lett. 1993, 208, 111.
4. (a) Ditchfield, R.; Hehre, W. J.; Pople, J. A. J. Chem. Phys. 1971, 54, 724. (b) Hehre, W. J.; Ditchfield, R.; Pople, J. A. J. Chem. Phys. 1971, 54, 2257. (c) Hariharan, P. C.; Pople, J. A. Theor. Chim. Acta. 1973, 28, 213.
5. Zhao, Y.; Truhlar, D. G. Theor. Chem. Acc. 2008, 120, 215.
6. (a) Dolg, M.; Wedig, U.; Stoll, H.; Preuss, H. J. Chem. Phys. 1987, 86, 866. (b) Andrae, D.; Häußermann, U.; Dolg, M.; Stoll, H.; Preuß, H. Theor. Chem. Acc. 1990, 77, 123.
7. Krishnan, R.; Binkley, J. S.; Seeger, R.; Pople, J. A. J. Chem. Phys. 1980, 72, 650.
8. Marenich, A. V.; Cramer, C. J.; Truhlar, D. G. J. Phys. Chem. B 2009, 113, 6378.
9. (a) G. He, S.-Y. Zhang, W. A. Nack, Q. Li, and G. Chen, Angew. Chem. Int. Ed. 2013, 52, 11124. (b) Y. Aihara, M. Tobisu, Y. Fukumoto, N. Chatani, J. Am. Chem. Soc. 2014, 136, 15509
10. (a) H. Zhao, C. P. Vandebosche, S. G. Koenig, S. P. Singh, R. P. Bakale, Org. Lett., 2008, 10, 505. (b) E.J. Mceachern, W. Yang, G. Chen, R.T. Skerlj, G.J. Bridger, synthetic communications, 2003, 33, 3497
11. B. D. Zlatopolskiy, H.-P. Kroll, E. Melotto, A. d. Meijere, Eur. J. Org. Chem. 2004, 4492
12. (a) D. Shabashov, O. Daugulis, J. Am. Chem. Soc. 2010, 132, 3965. (b) S.-Y. Zhang, Q. Li, G. He, W. A. Nack, G. Chen, J. Am. Chem. Soc. 2013, 135, 12135. (c) Nadres, E. T.; Santos, G. I. F.; Shabashov, D.; Daugulis, O., J. Org. Chem. 2013, 78, 9689. (d) G. Shan, X. Yang, Y. Zong, Y. Rao, Angew. Chem. Int. Ed. 2013, 52, 13606.

## XI. Date of products

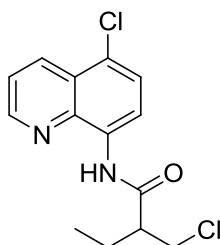

### 2-(chloromethyl)-N-(5-chloroquinolin-8-yl)butanamide ( **2** )

Following the general procedure, substrate (132 mg, 0.50 mmol), NCS (133 mg, 1.0 mmol), Pd(OAc)<sub>2</sub> (11 mg, 0.05 mmol) and 5 ml AcOH were used. The reaction mixture was stirred at rt for 35 h. After completion of the reaction, the residue was purified by silical gel column chromatography (petroleum ether: ethyl acetate = 15:1). Finally, compound (**2**) (111 mg, white solid) was isolated in 75% yield.

<sup>1</sup>H-NMR (400 MHz, CDCl<sub>3</sub>) δ (ppm) 9.91 (s, 1H), 8.83 (d, *J* = 4.2 Hz, 1H), 8.75 (d, *J* = 8.4 Hz, 1H), 8.52 (d, *J* = 8.5 Hz, 1H), 7.59-7.52 (m, 2H), 3.90 (t, *J* = 10.5 Hz, 1H), 3.70-3.67 (m, 1H), 2.84-2.77 (m, 1H), 1.93-1.71 (m, 2H), 1.05 (t, *J* = 7.5 Hz, 3H); <sup>13</sup>C-NMR (100 MHz, CDCl<sub>3</sub>) δ (ppm) 171.45, 148.85, 139.01, 133.44, 127.23, 125.97, 124.73, 122.47, 116.71, 53.19, 44.99, 24.35, 11.76; LRMS (ESI) calcd for C<sub>14</sub>H<sub>14</sub>Cl<sub>2</sub>N<sub>2</sub>O [M+H]<sup>+</sup>: 297.05, found 297.38

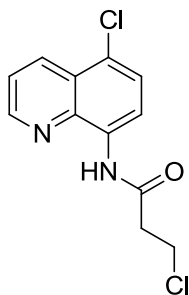

### 3-Chloro-N-(5-chloroquinolin-8-yl)propanamide ( **3a** )

Following the general procedure, substrate (23.4 mg, 0.10 mmol), NCS (33 mg, 0.25 mmol), Pd(OAc)<sub>2</sub> (2.2 mg, 0.01 mmol) and 1 ml AcOH were used. The reaction mixture was stirred at rt for 48 h. After completion of the reaction, the residue was purified by silica gel column chromatography (petroleum ether: ethyl acetate=15: 1). Finally, compound ( **3a** ) (14 mg, white solid) was isolated in 52% yield.

<sup>1</sup>H-NMR (400 MHz, CDCl<sub>3</sub>) δ (ppm) 9.84 (s, 1H), 8.84 (t, *J* = 1.2 Hz, 1H), 8.71 (d, *J* = 8.4 Hz, 1H), 8.55 (d, *J* = 8.5 Hz, 1H), 7.60-7.55 (m, 2H), 3.95 (t, *J* = 6.6 Hz, 2H), 3.03 (t, *J* = 6.5 Hz, 2H); <sup>13</sup>C-NMR (100 MHz, CDCl<sub>3</sub>) δ (ppm) 168.06, 148.84, 138.92, 133.55, 133.47, 127.30, 126.03, 124.79, 122.53, 116.72, 40.98, 39.76; LRMS (ESI) calcd for C<sub>12</sub>H<sub>10</sub>Cl<sub>2</sub>N<sub>2</sub>O [M+H]<sup>+</sup>: 269.02, found 269.49

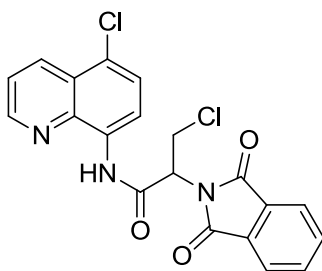

### 3-Chloro-N-(5-chloroquinolin-8-yl)-2-(1,3-dioxoisindolin-2-yl)propanamide ( **3b** )

Following the general procedure, substrate (38 mg, 0.10 mmol), NCS (27 mg, 0.2 mmol), Pd(OAc)<sub>2</sub> (2.2 mg, 0.01 mmol) and 2 ml AcOH were used. The reaction mixture was stirred at rt for 36 h. After completion of the reaction, the residue was purified by silica gel column chromatography (petroleum ether: ethyl acetate= 3: 1). Finally, compound ( **3b** ) (35 mg, white solid) was isolated in 85% yield.

<sup>1</sup>H-NMR (400 MHz, CDCl<sub>3</sub>) δ (ppm) 10.28 (s, 1H), 8.64-8.60 (m, 2H), 8.51 (dd, *J* = 8.5 Hz, *J* = 1.4 Hz, 1H), 7.95 (dd, *J* = 5.4 Hz, *J* = 3.1 Hz, 2H), 7.81 (dd, *J* = 5.4 Hz, *J* = 3.1 Hz, 2H), 7.57 (d, *J* = 8.4 Hz, 1H), 7.51-7.48 (m, 1H), 5.41-5.38 (m, 1H), 4.56-4.45 (m, 2H); <sup>13</sup>C-NMR (100 MHz, CDCl<sub>3</sub>) δ (ppm) 167.68, 164.44, 149.08, 139.02, 134.77, 133.51, 132.76, 131.67, 127.15, 125.99, 125.42, 124.11, 122.57, 116.94, 56.24, 41.16; LRMS (ESI) calcd for C<sub>20</sub>H<sub>13</sub>Cl<sub>2</sub>N<sub>3</sub>O<sub>3</sub> [M+H]<sup>+</sup>: 414.03, found 413.92

### Chiral HPLC Data

#### HPLC Conditions:

Chiral stationary phase: CHIRALPAK<sup>®</sup> AD-H, *n*-hexane/isopropanol = 50:50, 0.60 mL/min

Signal: VWD1 A, Wavelength = 254 nm

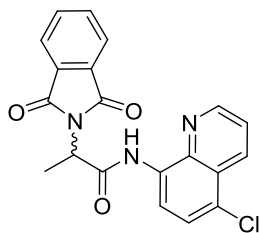

**DL-Starting material**

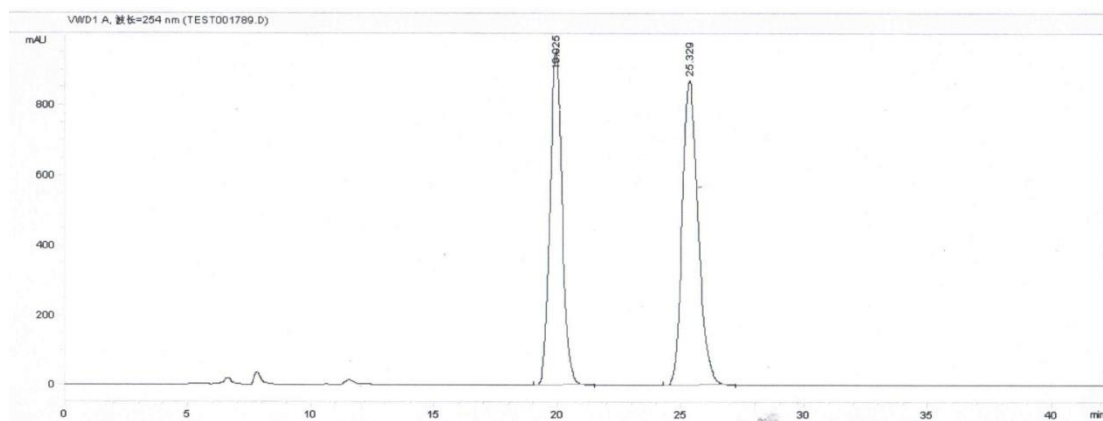

**Area% report for DL- Starting material:**

| Retention Time (min) | Area    | Area % | Height | Symmetry Factor |
|----------------------|---------|--------|--------|-----------------|
| 19.925               | 32884.5 | 45.594 | 949.1  | 0.944           |
| 25.329               | 39240.3 | 54.406 | 869.2  | 0.769           |

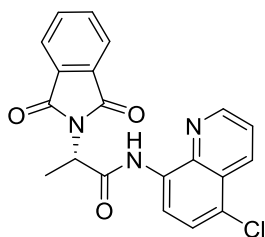

**L- Starting material**

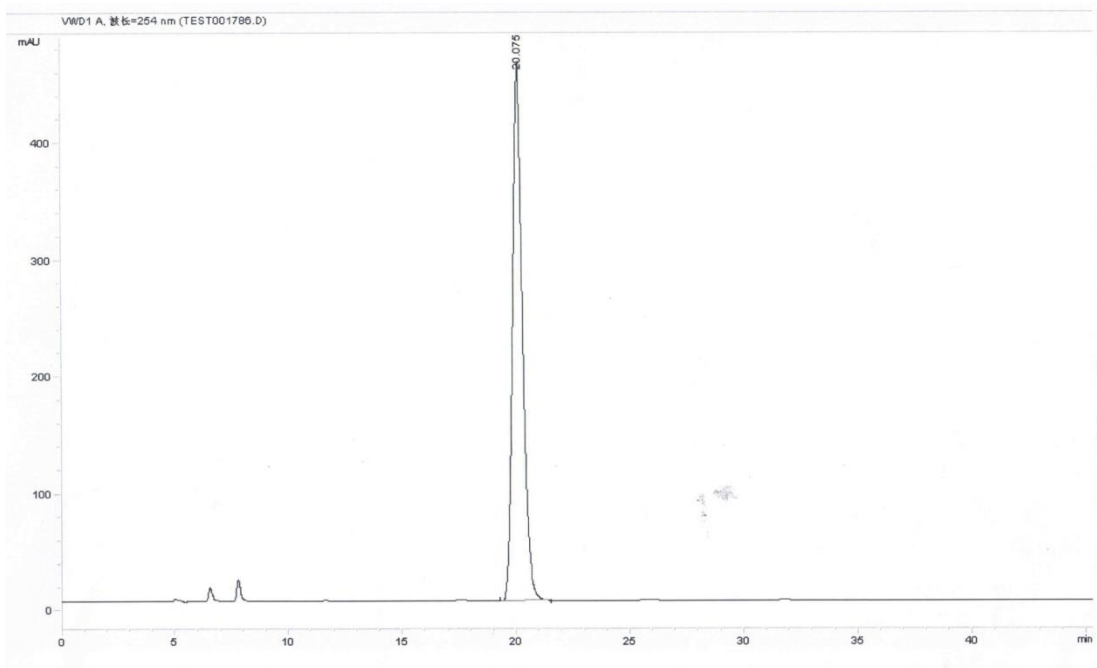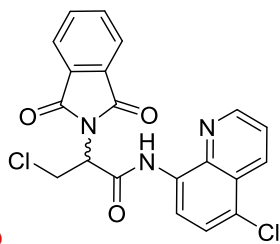

**DL-3b**

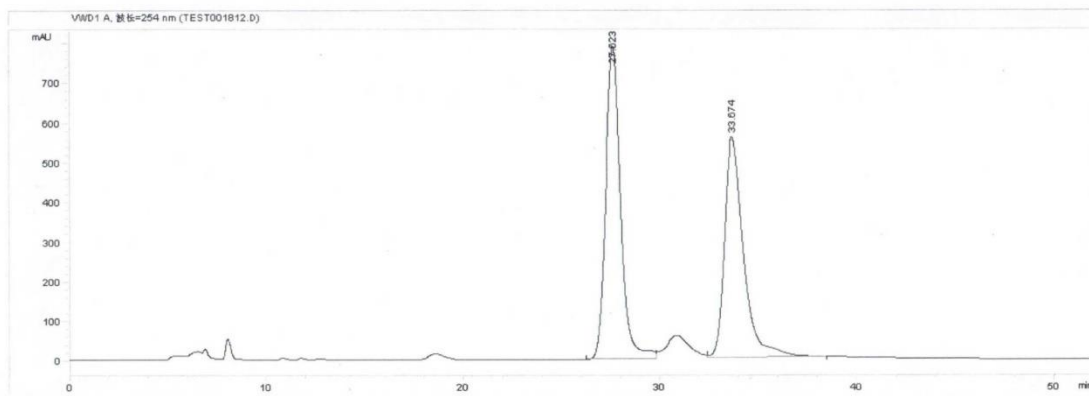

**Area% report for DL-3b:**

| Retention Time (min) | Area    | Area % | Height | Symmetry Factor |
|----------------------|---------|--------|--------|-----------------|
| 27.623               | 41356.2 | 52.533 | 786.5  | 0.913           |
| 33.674               | 37367.7 | 47.467 | 557.5  | 0.640           |

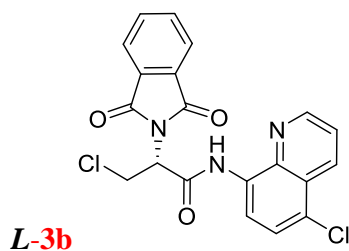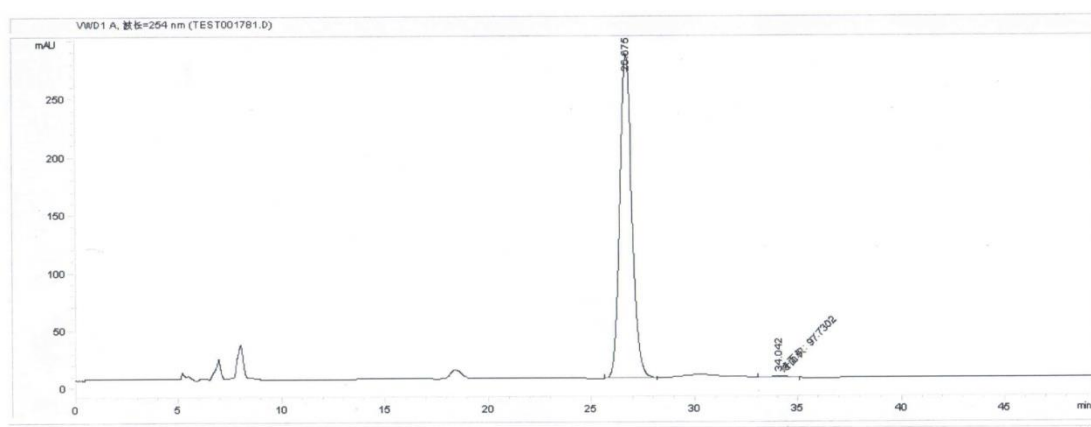

**Area% report for L-3b:**

| Retention Time (min) | Area    | Area % | Height | Symmetry Factor |
|----------------------|---------|--------|--------|-----------------|
| 26.675               | 11598.3 | 99.164 | 279.7  | 0.925           |
| 34.042               | 97.7    | 0.836  | 1.7    | 0.992           |

**3-Chloro-N-(5-chloroquinolin-8-yl)-2-methylpropanamide ( 3c1 )**

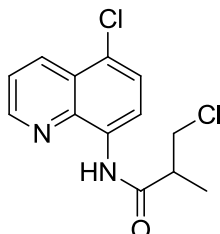

Following the general procedure, substrate (50 mg, 0.2 mmol), NCS (80 mg, 0.6 mmol), Pd(OAc)<sub>2</sub> (4.5 mg, 0.02 mmol) and 2 ml AcOH were used. The reaction mixture was stirred at rt for 25 h. After completion of the reaction, the residue was purified by silica gel column chromatography (petroleum ether: ethyl acetate =20: 1). Finally, compound ( **3c1** ) (14 mg, white solid) and compound ( **3c2** ) (32mg, white solid)was isolated in 25% yield and 50% yield respectively.

<sup>1</sup>H-NMR (400 MHz, CDCl<sub>3</sub>) δ (ppm) 9.95 (s, 1H), 8.86 (dd, *J* = 4.2 Hz, *J* = 1.5 Hz, 1H), 8.74 (d, *J* = 8.4 Hz, 1H), 8.58 (dd, *J* = 8.5 Hz, *J* = 1.5 Hz, 1H), 7.62-7.57 (m, 2H), 3.94-3.89 (m, 1H), 3.70-3.65 (m, 1H), 3.03-3.00 (m, 1H), 1.45 (d, *J* = 7.0 Hz, 3H); <sup>13</sup>C-NMR (100 MHz, CDCl<sub>3</sub>) δ (ppm) 171.91, 148.91, 139.14, 133.61, 127.35, 126.10, 124.82, 122.55, 116.79, 46.49, 45.65, 16.35; LRMS (ESI) calcd for C<sub>13</sub>H<sub>12</sub>Cl<sub>2</sub>N<sub>2</sub>O [M+H]<sup>+</sup>: 283.03, found 283.52

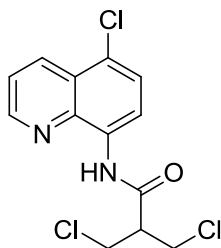

**3-Chloro-2-(chloromethyl)-N-(5-chloroquinolin-8-yl)propanamide ( 3c2 )**

$^1\text{H-NMR}$  (400 MHz,  $\text{CDCl}_3$ )  $\delta$  (ppm) 10.06 (s, 1H), 8.87 (dd,  $J = 4.2$  Hz,  $J = 1.4$  Hz, 1H), 8.72 (d,  $J = 8.4$  Hz, 1H), 8.58 (dd,  $J = 8.5$  Hz,  $J = 1.4$  Hz, 1H), 7.62-7.58 (m, 2H), 4.00-3.95 (m, 2H), 3.90-3.86 (m, 2H), 3.30-3.23 (m, 1H);  $^{13}\text{C-NMR}$  (100 MHz,  $\text{CDCl}_3$ )  $\delta$  (ppm) 168.14, 149.06, 139.08, 133.64, 133.14, 127.26, 126.11, 125.34, 122.67, 117.01, 53.31, 42.77; LRMS (ESI) calcd for  $\text{C}_{13}\text{H}_{11}\text{Cl}_3\text{N}_2\text{O}$   $[\text{M}+\text{H}]^+$ : 316.99, found 316.94

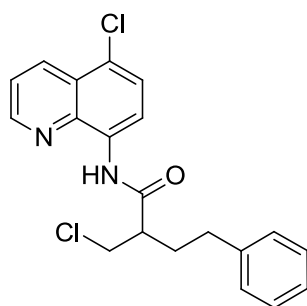

**2-(chloromethyl)-N-(5-chloroquinolin-8-yl)-4-phenylbutanamide ( 3d1 )**

Following the general procedure, substrate (135.2 mg, 0.4 mmol), NCS (80 mg, 0.6 mmol),  $\text{Pd}(\text{OAc})_2$  (9 mg, 0.04 mmol) and 4 ml AcOH were used. The reaction mixture was stirred at rt for 24h. After completion of the reaction, the residue was purified by silical gel column chromatography (toluene: petroleum ether = 3:1-5:1). Finally, compound ( **3d1** ) (100 mg, yellow solid) was isolated in 68% yield.

**3.0mmol scale**

Following the general procedure, substrate (1014 mg, 3.0 mmol), NCS (801 mg, 6.0 mmol),  $\text{Pd}(\text{OAc})_2$  (67 mg, 0.3 mmol) and 10 ml AcOH were used. The reaction mixture was stirred at rt for 48h. After completion of the reaction, the residue was purified by silical gel column chromatography (toluene: petroleum ether = 3:1-5:1). Finally, compound ( **3d1** ) (446 mg, white solid) and compound ( **3d2** ) (330mg, white solid) were isolated in 40% and 27% yield.

$^1\text{H-NMR}$  (400 MHz,  $\text{CDCl}_3$ )  $\delta$  (ppm) 9.92 (s, 1H), 8.87 (d,  $J = 3.9$  Hz, 1H), 8.78 (d,  $J = 8.4$  Hz, 1H), 8.58 (d,  $J = 8.5$  Hz, 1H), 7.63-7.58 (m, 2H), 7.30-7.20 (m, 5H), 3.91 (t,  $J = 10.1$  Hz, 1H), 3.69-3.65 (m, 1H), 2.89-2.78 (m, 2H), 2.73-2.65 (m, 1H), 2.24-2.17 (m, 1H), 2.06-2.00 (m, 1H);  $^{13}\text{C-NMR}$  (100 MHz,  $\text{CDCl}_3$ )  $\delta$  (ppm) 171.22, 148.91, 140.77, 139.11, 133.56, 133.42, 128.71, 128.60, 127.32, 126.39, 126.09, 124.92, 122.57, 116.87, 50.91, 45.38, 33.32, 32.63; LRMS (ESI) calcd for  $\text{C}_{20}\text{H}_{19}\text{Cl}_2\text{N}_2\text{O}$   $[\text{M}+\text{H}]^+$ : 373.08, found 372.93

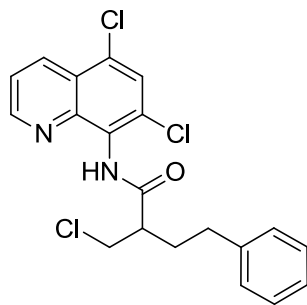

**2-(chloromethyl)-N-(5,7-dichloroquinolin-8-yl)-4-phenylbutanamide ( 3d2 )**

**0.1mmol scale**

$^1\text{H-NMR}$  (400 MHz,  $\text{CDCl}_3$ )  $\delta$  (ppm) 8.88-8.87 (m, 1H), 8.49-8.46 (m, 1H), 8.41 (s, 1H), 7.67 (s, 1H), 7.52-7.49 (m, 1H), 7.34-7.31 (m, 4H), 7.26-7.21 (m, 1H), 3.95-3.90 (m, 1H), 3.69-3.65 (m, 1H), 2.97-2.93 (m, 2H), 2.86-2.81 (m, 1H), 2.24-2.19 (m, 1H), 2.09-2.03 (m, 1H);  $^{13}\text{C-NMR}$  (100 MHz,  $\text{CDCl}_3$ )  $\delta$  (ppm) 171.01, 150.96, 143.74, 141.30, 133.26, 130.83, 130.55, 129.33, 128.67, 128.63, 128.29, 126.29, 125.21, 122.42, 49.81, 45.29, 33.06, 32.66, 29.81; LRMS (ESI) calcd for  $\text{C}_{20}\text{H}_{18}\text{Cl}_3\text{N}_2\text{O}$   $[\text{M}+\text{H}]^+$ : 409.04, found 408.90

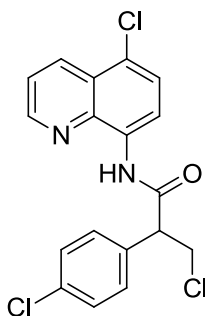

**3-Chloro-2-(4-chlorophenyl)-N-(5-chloroquinolin-8-yl)propanamide ( 3e )**

Following the general procedure, substrate (33 mg, 0.10 mmol), NCS (16 mg, 0.12 mmol),  $\text{Pd}(\text{OAc})_2$  (2.2 mg, 0.01 mmol) and 2 ml AcOH were used. The reaction mixture was stirred at rt for 30 h. After completion of the reaction, the residue was purified by silica gel column chromatography (petroleum ether: ethyl acetate= 3: 1). Finally, compound ( 3e ) (20 mg, yellow solid) was isolated in 55% yield.

$^1\text{H-NMR}$  (400 MHz,  $\text{CDCl}_3$ )  $\delta$  (ppm) 9.87 (s, 1H), 8.80 (t,  $J = 2.4$  Hz, 1H), 8.70 (d,  $J = 8.5$  Hz, 1H), 8.54 (d,  $J = 8.5$  Hz, 1H), 7.59-7.57 (m, 2H), 7.44 (d,  $J = 7.0$  Hz, 2H), 7.37 (d,  $J = 7.0$  Hz, 2H), 4.31 (t,  $J = 10.5$  Hz, 1H), 4.07 (t,  $J = 6.7$  Hz, 1H), 3.80 (dd,  $J = 10.8$  Hz,  $J = 6.4$  Hz, 1H);  $^{13}\text{C-NMR}$  (100 MHz,  $\text{CDCl}_3$ )  $\delta$  (ppm) 168.75, 148.94, 138.98, 134.99, 134.56, 133.58, 133.34, 129.54, 129.52, 127.23, 126.04, 125.08, 122.57, 116.73, 56.49, 45.07; LRMS (ESI) calcd for  $\text{C}_{18}\text{H}_{13}\text{Cl}_3\text{N}_2\text{O}$   $[\text{M}+\text{H}]^+$ : 379.01, found 378.93

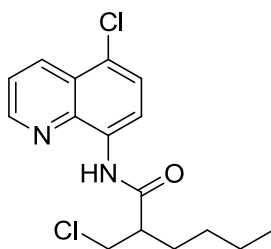



### 2-(Chloromethyl)-N-(5-chloroquinolin-8-yl)hexanamide ( **3f** )

Following the general procedure, substrate (35 mg, 0.12 mmol), NCS (32 mg, 0.24 mmol), Pd(OAc)<sub>2</sub> (2.7 mg, 0.012 mmol) and 2 ml AcOH were used. The reaction mixture was stirred at rt for 27 h. After completion of the reaction, the residue was purified by silica gel column chromatography (toluene: petroleum ether= 3: 1 - 5: 1). Finally, compound ( **3f** ) (35 mg, colorless oil) was isolated in 90% yield.

<sup>1</sup>H-NMR (400 MHz, CDCl<sub>3</sub>) δ (ppm) 9.91 (s, 1H), 8.85 (d, *J* = 3.9 Hz, 1H), 8.75 (d, *J* = 8.4 Hz, 1H), 8.54 (d, *J* = 8.5 Hz, 1H), 7.60-7.54 (m, 2H), 3.92-3.87 (m, 1H), 3.68 (dd, *J* = 10.8 Hz, *J* = 5.0 Hz, 1H), 2.88-2.83 (m, 1H), 1.87-1.80 (m, 1H), 1.72-1.67 (m, 1H), 1.39-1.25 (m, 4H), 0.88 (t, *J* = 7.1 Hz, 3H); <sup>13</sup>C-NMR (100 MHz, CDCl<sub>3</sub>) δ (ppm) 171.63, 148.87, 139.04, 133.46, 127.26, 126.00, 124.74, 122.48, 116.74, 51.81, 45.34, 30.92, 29.41, 22.74, 13.94; LRMS (ESI) calcd for C<sub>16</sub>H<sub>19</sub>Cl<sub>2</sub>N<sub>2</sub>O [M+H]<sup>+</sup>: 325.08, found 325.47

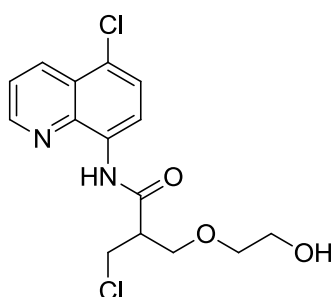

### 3-Chloro-N-(5-chloroquinolin-8-yl)-2-((2-hydroxyethoxy)methyl)propanamide ( **3g** )

Following the general procedure, substrate (31 mg, 0.1 mmol), NCS (27 mg, 0.2 mmol), Pd(OAc)<sub>2</sub> (4.5 mg, 0.02 mmol) and 1 ml AcOH were used. The reaction mixture was stirred at rt for 48 h. After completion of the reaction, the residue was purified by silica gel column chromatography (petroleum ether: ethyl acetate= 2: 1). Finally, compound ( **3g** ) (19 mg) was isolated in 56% yield.

<sup>1</sup>H-NMR (400 MHz, CD<sub>3</sub>OD) δ (ppm) 8.90-8.88 (m, 1H), 8.65 (d, *J* = 8.4 Hz, 1H), 8.60-8.58 (m, 1H), 7.64-7.55 (m, 2H), 3.93-3.90 (m, 4H), 3.82-3.80 (m, 2H), 3.71-3.68 (m, 2H), 3.25-3.19 (m, 1H); <sup>13</sup>C-NMR (100 MHz, CD<sub>3</sub>OD) δ (ppm) 169.97, 148.73, 138.79, 133.09, 132.87, 126.39, 125.59, 124.55, 122.11, 116.67, 72.49, 68.96, 60.52, 49.77, 41.38; LRMS (ESI) calcd for C<sub>15</sub>H<sub>16</sub>Cl<sub>2</sub>N<sub>2</sub>O<sub>3</sub> [M+H]<sup>+</sup>: 343.05, found 343.35.

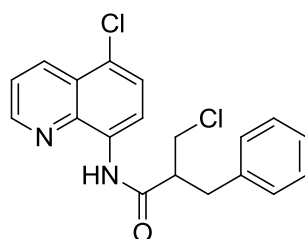

### 2-Benzyl-3-chloro-N-(5-chloroquinolin-8-yl)propanamide ( **3h** )

Following the general procedure, substrate (32,4 mg, 0.10 mmol), NCS (16 mg, 1.2 mmol), Pd(OAc)<sub>2</sub> (2.2 mg, 0.01 mmol) and 2ml ACOH were used. The reaction mixture was stirred at rt for 48 h. After completion of the reaction, the residue was purified by silica gel column chromatography (toluene: petroleum ether= 3: 1). Finally, compound ( **3h** ) (18 mg, yellow oil) was isolated in 50% yield.

<sup>1</sup>H-NMR (400 MHz, CDCl<sub>3</sub>) δ (ppm) 9.73 (s, 1H), 8.77 (t, *J* = 1.3 Hz, 1H), 8.72 (d, *J* = 8.4 Hz, 1H),

8.53 (dd,  $J = 8.5$  Hz,  $J = 1.3$  Hz, 1H), 7.58 (d,  $J = 8.4$  Hz, 1H), 7.54-7.51 (m, 1H), 7.25-7.24 (m, 4H), 7.17-7.15 (m, 1H), 3.94-3.89 (m, 1H), 3.71 (dd,  $J = 10.9$  Hz,  $J = 4.5$  Hz, 1H), 3.17-3.04 (m, 3H);  $^{13}\text{C}$ -NMR (100 MHz,  $\text{CDCl}_3$ )  $\delta$  (ppm) 170.71, 148.77, 139.00, 137.89, 133.44, 133.35, 129.06, 128.87, 127.26, 126.97, 125.97, 124.82, 122.47, 116.75, 53.38, 44.75, 37.07; LRMS (ESI) calcd for  $\text{C}_{19}\text{H}_{17}\text{Cl}_2\text{N}_2\text{O}$   $[\text{M}+\text{H}]^+$ : 359.06, found 358.95

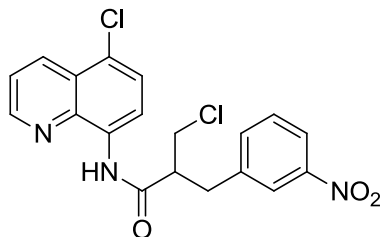

### 3-Chloro-N-(5-chloroquinolin-8-yl)-2-(3-nitrobenzyl)propanamide ( **3i** )

Following the general procedure, substrate (37 mg, 0.10 mmol), NCS (20 mg, 0.15 mmol),  $\text{Pd}(\text{OAc})_2$  (2.2 mg, 0.01 mmol) and 2ml ACOH were used. The reaction mixture was stirred at rt for 48 h. After completion of the reaction, the residue was purified by silica gel column chromatography (petroleum ether: ethyl acetate= 10: 1). Finally, compound ( **3i** ) (27 mg, white solid) was isolated in 67% yield.

$^1\text{H}$ -NMR (400 MHz,  $(\text{CD}_3)_2\text{SO}$ )  $\delta$  (ppm) 10.38 (s, 1H), 8.96 (d,  $J = 3.4$  Hz, 1H), 8.57 (t,  $J = 8.4$  Hz, 1H), 8.25 (s, 1H), 8.09 (d,  $J = 8.1$  Hz, 1H), 7.79-7.73 (m, 3H), 7.52 (t,  $J = 7.9$  Hz, 1H), 3.92-3.88 (m, 1H), 3.83-3.80 (m, 1H), 3.74-3.70 (m, 1H), 3.16-3.05 (m, 2H);  $^{13}\text{C}$ -NMR (100 MHz,  $(\text{CD}_3)_2\text{SO}$ )  $\delta$  (ppm) 170.81, 149.57, 147.77, 140.52, 138.93, 135.98, 133.77, 132.77, 129.67, 126.93, 125.27, 123.72, 123.56, 123.23, 121.45, 117.51, 49.86, 45.02, 35.74; LRMS (ESI) calcd for  $\text{C}_{19}\text{H}_{15}\text{Cl}_2\text{N}_3\text{O}_3$   $[\text{M}+\text{H}]^+$ : 404.05, found 403.88

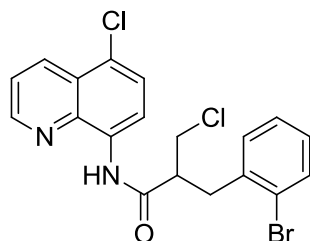

### 2-(2-Bromobenzyl)-3-chloro-N-(5-chloroquinolin-8-yl)propanamide ( **3j** )

Following the general procedure, substrate (41 mg, 0.1 mmol), NCS (27 mg, 0.2 mmol),  $\text{Pd}(\text{OAc})_2$  (3.4 mg, 0.015 mmol) and 1 ml AcOH were used. The reaction mixture was stirred at rt for 48 h. After completion of the reaction, the residue was purified by silica gel column chromatography (petroleum ether: ethyl acetate= 10: 1). Finally, compound ( **3j** ) (26.5 mg) was isolated in 61% yield.

$^1\text{H}$ -NMR (400 MHz,  $\text{CDCl}_3$ )  $\delta$  (ppm) 9.80 (s, 1H), 8.80-8.79 (m, 1H), 8.72 (d,  $J = 8.2$  Hz, 1H), 8.55-8.53 (m, 1H), 7.60-7.54 (m, 3H), 7.26-7.25 (m, 1H), 7.16-7.12 (m, 1H), 7.05-7.01 (m, 1H), 3.99-3.94 (m, 1H), 3.73-3.71 (m, 1H), 3.32-3.14 (m, 3H);  $^{13}\text{C}$ -NMR (100 MHz,  $\text{CDCl}_3$ )  $\delta$  (ppm) 170.43, 148.85, 139.08, 137.43, 133.45, 133.32, 131.66, 128.84, 127.81, 127.27, 126.02, 124.87, 124.70, 122.48, 116.80, 51.14, 44.46, 37.70; LRMS (ESI) calcd for  $\text{C}_{19}\text{H}_{15}\text{BrCl}_2\text{N}_2\text{O}$   $[\text{M}+\text{H}]^+$ : 436.97, found 437.65

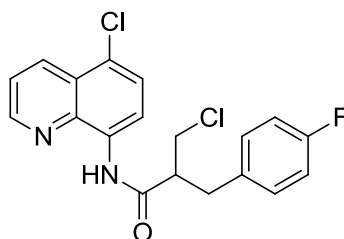

### 3-Chloro-N-(5-chloroquinolin-8-yl)-2-(4-fluorobenzyl)propanamide ( **3k** )

Following the general procedure, substrate (34 mg, 0.10 mmol), NCS (27 mg, 0.2 mmol), Pd(OAc)<sub>2</sub> (2.2 mg, 0.01 mmol) and 2 ml AcOH were used. The reaction mixture was stirred at rt for 40 h. After completion of the reaction, the residue was purified by silica gel column chromatography (toluene: petroleum ether= 10: 1). Finally, compound ( **3k** ) (23 mg, white solid) was isolated in 62% yield.

<sup>1</sup>H-NMR (400 MHz, CDCl<sub>3</sub>) δ (ppm) 9.68 (s, 1H), 8.78-8.76 (m, 1H), 8.69 (d, *J* = 8.4 Hz, 1H), 8.54 (dd, *J* = 8.5 Hz, *J* = 1.4 Hz, 1H), 7.60-7.53 (m, 2H), 7.22-7.19 (m, 2H), 6.91 (t, *J* = 8.6 Hz, 2H), 3.94-3.89 (m, 1H), 3.72-3.69 (m, 1H), 3.12-3.04 (m, 3H); <sup>13</sup>C-NMR (100 MHz, CDCl<sub>3</sub>) δ (ppm) 170.45, 161.97 (d, *J*<sub>C-F</sub> = 244 Hz), 148.82, 139.01, 133.68, 133.57 (d, *J*<sub>C-F</sub> = 14 Hz), 133.27, 130.57 (d, *J*<sub>C-F</sub> = 8 Hz), 127.26, 126.04, 124.96, 122.52, 116.80, 115.82, 115.61, 53.57, 44.70, 36.25; LRMS (ESI) calcd for C<sub>19</sub>H<sub>15</sub>Cl<sub>2</sub>FN<sub>2</sub>O [M+H]<sup>+</sup>: 377.05, found 376.93

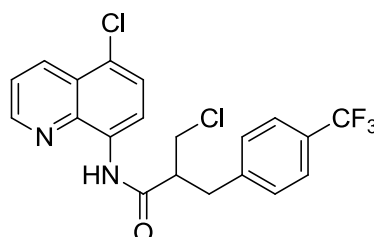

### 3-Chloro-N-(5-chloroquinolin-8-yl)-2-(4-(trifluoromethyl)benzyl)propanamide ( **3l** )

Following the general procedure, substrate (40 mg, 0.1 mmol), NCS (27 mg, 0.2 mmol), Pd(OAc)<sub>2</sub> (3.4 mg, 0.015 mmol) and 1 ml AcOH were used. The reaction mixture was stirred at rt for 48 h. After completion of the reaction, the residue was purified by silica gel column chromatography (petroleum ether: ethyl acetate= 6: 1). Finally, compound ( **3l** ) (36 mg) was isolated in 85% yield.

<sup>1</sup>H-NMR (400 MHz, CDCl<sub>3</sub>) δ (ppm) 9.64 (s, 1H), 8.72-8.66 (m, 2H), 8.51 (d, *J* = 8.4 Hz, 1H), 7.58-7.46 (m, 4H), 7.36 (d, *J* = 7.9 Hz, 2H), 3.96-3.92 (m, 1H), 3.75-3.71 (m, 1H), 3.22-3.13 (m, 3H); <sup>13</sup>C-NMR (100 MHz, CDCl<sub>3</sub>) δ (ppm) 170.04, 148.80, 142.14, 138.85, 133.42, 133.04, 129.42, 129.28 (q, *J*<sub>C-F</sub> = 32 Hz), 127.15, 125.94, 125.77 (q, *J*<sub>C-F</sub> = 4 Hz), 125.04, 124.17 (q, *J*<sub>C-F</sub> = 271 Hz), 122.50, 116.75, 53.16, 44.67, 36.75; LRMS (ESI) calcd for C<sub>20</sub>H<sub>15</sub>Cl<sub>2</sub>F<sub>3</sub>N<sub>2</sub>O [M+H]<sup>+</sup>: 427.05, found 427.03.

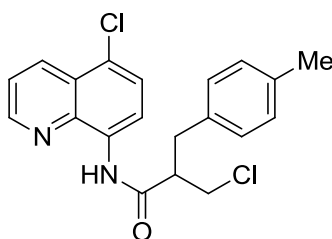

### 3-Chloro-N-(5-chloroquinolin-8-yl)-2-(4-methylbenzyl)propanamide ( **3m** )

Following the general procedure, substrate (34 mg, 0.1 mmol), NCS (27 mg, 0.2 mmol), Pd(OAc)<sub>2</sub> (3.4 mg, 0.015 mmol) and 1 ml AcOH were used. The reaction mixture was stirred at rt for 36 h.

After completion of the reaction, the residue was purified by silica gel column chromatography (petroleum ether: ethyl acetate= 6: 1). Finally, compound (**3m**) (19 mg) was isolated in 51% yield.

<sup>1</sup>H-NMR (400 MHz, CDCl<sub>3</sub>) δ (ppm) 9.74 (s, 1H), 8.79-8.78 (m, 1H), 8.72 (d, *J* = 8.3 Hz, 1H), 8.56-8.54 (m, 1H), 7.61-7.54 (m, 2H), 7.13 (d, *J* = 7.6 Hz, 2H), 7.05 (d, *J* = 7.6 Hz, 2H), 3.93-3.88 (m, 1H), 3.71-3.68 (m, 1H), 3.15-3.11 (m, 2H), 3.04-2.97 (m, 1H), 2.24 (s, 3H); <sup>13</sup>C-NMR (100 MHz, CDCl<sub>3</sub>) δ (ppm) 170.82, 148.71, 139.02, 136.49, 134.73, 133.43, 133.41, 129.52, 128.91, 127.27, 125.97, 124.76, 122.42, 116.75, 53.43, 44.72, 36.65, 21.11; LRMS (ESI) calcd for C<sub>20</sub>H<sub>18</sub>Cl<sub>2</sub>N<sub>2</sub>O [M+H]<sup>+</sup>: 373.08, found 373.03.

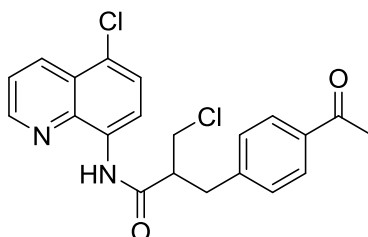

### 2-(4-acetylbenzyl)-3-chloro-N-(5-chloroquinolin-8-yl)propanamide (**3n**)

Following the general procedure, substrate (37 mg, 0.10 mmol), NCS (54 mg, 0.2 mmol), Pd(OAc)<sub>2</sub> (2.2 mg, 0.01 mmol) and 2 ml AcOH were used. The reaction mixture was stirred at rt for 48 h. After completion of the reaction, the residue was purified by silica gel column chromatography (toluene: ethyl acetate= 10: 1). Finally, compound (**3n**) (20 mg, yellow oil) was isolated in 50% yield.

<sup>1</sup>H-NMR (400 MHz, CDCl<sub>3</sub>) δ (ppm) 9.74 (s, 1H), 8.79-8.78 (m, 1H), 8.72 (d, *J* = 8.4 Hz, 1H), 8.55-8.53 (m, 1H), 7.60-7.53 (m, 2H), 7.13 (d, *J* = 7.9 Hz, 2H), 7.05 (d, *J* = 7.9 Hz, 2H), 3.93-3.88 (m, 1H), 3.72-3.68 (m, 1H), 3.16-3.08 (m, 2H), 3.04-2.97 (m, 1H), 2.24 (s, 3H); <sup>13</sup>C-NMR (100 MHz, CDCl<sub>3</sub>) δ (ppm) 197.8, 170.5, 148.9, 143.7, 139.0, 136.0, 133.6, 133.1, 129.4, 129.0, 127.3, 126.1, 125.1, 122.6, 116.9, 53.7, 40.0, 26.7, 5.0; LRMS (ESI) calcd for C<sub>21</sub>H<sub>18</sub>Cl<sub>2</sub>N<sub>2</sub>O<sub>2</sub> [M+H]<sup>+</sup>: 401.07, found 401.13.

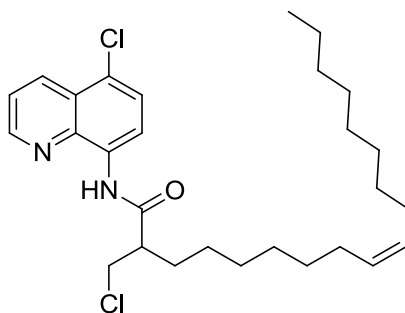

### (Z)-2-(chloromethyl)-N-(5-chloroquinolin-8-yl)octadec-9-enamide (**3o**)

Following the general procedure, substrate (30 mg, 0.067 mmol), NCS (18 mg, 0.134 mmol), Pd(OAc)<sub>2</sub> (1.5 mg, 0.007 mmol) and 2 ml AcOH were used. The reaction mixture was stirred at rt for 24 h. After completion of the reaction, the residue was purified by silica gel column chromatography (toluene: petroleum ether= 3: 1). Finally, compound (**3o**) (15 mg, colorless oil) was isolated in 46% yield.

<sup>1</sup>H-NMR (400 MHz, CDCl<sub>3</sub>) δ (ppm) 9.92 (s, 1H), 8.87-8.85 (m, 1H), 8.76 (d, *J* = 8.4 Hz, 1H), 8.57 (dd, *J* = 8.5 Hz, *J* = 1.5 Hz, 1H), 7.62-7.56 (m, 2H), 5.34-5.27 (m, 2H), 3.90 (dd, *J* = 10.8 Hz, *J* = 8.9 Hz, 1H), 3.67 (dd, *J* = 10.8 Hz, *J* = 5.1 Hz, 1H), 2.89-2.82 (m, 1H), 2.03-1.95 (m, 3H), 1.89-1.80 (m, 1H),

1.74-1.65 (m, 1H), 1.45-1.21 (m, 21H), 0.89 (t,  $J = 6.9$  Hz, 3H);  $^{13}\text{C}$ -NMR (100 MHz,  $\text{CDCl}_3$ )  $\delta$  (ppm) 171.63, 148.89, 139.11, 133.54, 133.49, 130.18, 129.73, 127.32, 126.07, 124.79, 122.51, 116.79, 51.83, 45.34, 32.02, 31.22, 29.87, 29.76, 29.64, 29.56, 29.44, 29.12, 27.33, 27.29, 27.23, 22.81, 14.25; LRMS (ESI) calcd for  $\text{C}_{28}\text{H}_{41}\text{Cl}_2\text{N}_2\text{O}$   $[\text{M}+\text{H}]^+$ : 491.25, found 491.14

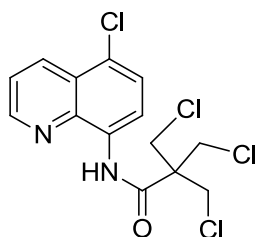

### 3-Chloro-2,2-bis(chloromethyl)-*N*-(5-chloroquinolin-8-yl)propanamide (3p)

Following the general procedure, substrate (26 mg, 0.1 mmol), NCS (54 mg, 0.4 mmol),  $\text{Pd}(\text{OAc})_2$  (4.5 mg, 0.02 mmol) and 1 ml AcOH were used. The reaction mixture was stirred at rt for 48 h. After completion of the reaction, the residue was purified by silica gel column chromatography (petroleum ether: ethyl acetate= 10: 1). Finally, compound (3p) (25.5 mg) was isolated in 70% yield.

$^1\text{H}$ -NMR (400 MHz,  $\text{CDCl}_3$ )  $\delta$  (ppm) 10.37 (s, 1H), 8.90 (d,  $J = 4.1$  Hz, 1H), 8.70 (d,  $J = 8.4$  Hz, 1H), 8.59 (d,  $J = 8.5$  Hz, 1H), 7.61 (t,  $J = 7.7$  Hz, 2H), 4.10 (s, 6H);  $^{13}\text{C}$ -NMR (100 MHz,  $\text{CDCl}_3$ )  $\delta$  (ppm) 166.93, 149.25, 139.35, 133.67, 132.86, 127.25, 126.13, 125.62, 122.73, 117.16, 55.81, 44.60; LRMS (ESI) calcd for  $\text{C}_{14}\text{H}_{12}\text{Cl}_4\text{N}_2\text{O}$   $[\text{M}+\text{H}]^+$ : 364.97, found 364.94.

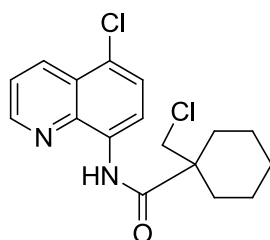

### 1-(Chloromethyl)-*N*-(5-chloroquinolin-8-yl)cyclohexanecarboxamide (3q1)

Following the general procedure, substrate (30 mg, 0.1 mmol), NCS (27 mg, 0.2 mmol),  $\text{Pd}(\text{OAc})_2$  (2.2 mg, 0.01 mmol) and 2 ml AcOH were used. The reaction mixture was stirred at rt for 36 h. After completion of the reaction, the residue was purified by silica gel column chromatography (petroleum ether: ethyl acetate= 40: 1). Finally, compound (3q1) (8 mg, colorless oil) and compound (3q2) (15 mg, ) were isolated in 25% yield and 40% respectively.

$^1\text{H}$ -NMR (400 MHz,  $\text{CDCl}_3$ )  $\delta$  (ppm) 10.35 (s, 1H), 8.88-8.86 (m, 1H), 8.78 (d,  $J = 8.4$  Hz, 1H), 8.56 (dd,  $J = 8.5$  Hz,  $J = 1.6$  Hz, 1H), 7.61-7.55 (m, 2H), 3.76 (s, 2H), 2.31-2.27 (m, 2H), 1.73-1.67 (m, 7H), 1.66-1.57 (m, 1H);  $^{13}\text{C}$ -NMR (100 MHz,  $\text{CDCl}_3$ )  $\delta$  (ppm) 172.70, 149.00, 139.55, 133.66, 133.49, 127.35, 126.07, 124.57, 122.46, 116.58, 51.90, 49.75, 32.33, 27.05, 25.81, 22.69; LRMS (ESI) calcd for  $\text{C}_{17}\text{H}_{19}\text{Cl}_2\text{N}_2\text{O}$   $[\text{M}+\text{H}]^+$ : 337.08, found 337.02

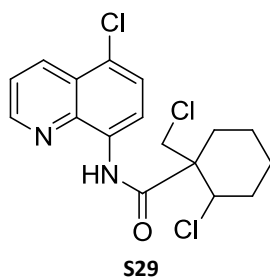

**2-Chloro-1-(chloromethyl)-N-(5-chloroquinolin-8-yl)cyclohexanecarboxamide ( 3q2 )**

<sup>1</sup>H-NMR (400 MHz, CDCl<sub>3</sub>) δ (ppm) 10.45 (s, 1H), 8.89-8.87 (m, 1H), 8.79 (d, *J* = 8.4 Hz, 1H), 8.55 (dd, *J* = 8.5 Hz, *J* = 1.6 Hz, 1H), 7.61-7.55 (m, 2H), 4.60 (t, *J* = 4.0 Hz, 1H), 4.00-3.92 (m, 2H), 2.46-2.39 (m, 1H), 2.28-2.24 (m, 1H), 2.13-1.99 (m, 2H), 1.90-1.82 (m, 2H), 1.64-1.59 (m, 2H); <sup>13</sup>C-NMR (100 MHz, CDCl<sub>3</sub>) δ (ppm) 170.83, 149.03, 139.59, 133.45, 133.37, 127.29, 126.06, 124.96, 122.49, 116.91, 62.07, 54.52, 47.46, 31.01, 27.04, 20.86; LRMS (ESI) calcd for C<sub>17</sub>H<sub>18</sub>Cl<sub>3</sub>N<sub>2</sub>O [M+H]<sup>+</sup>: 371.04, found 370.98

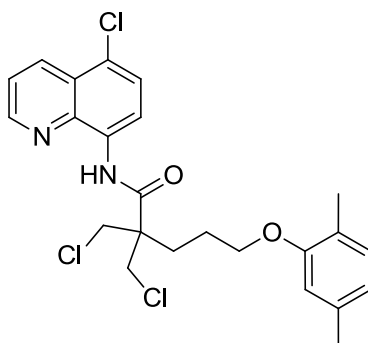**2,2-Bis(chloromethyl)-N-(5-chloroquinolin-8-yl)-5-(2,5-dimethylphenoxy)pentanamide ( 3r )**

Following the general procedure, substrate (53 mg, 0.13 mmol), NCS (35 mg, 0.26 mmol), Pd(OAc)<sub>2</sub> (3 mg, 0.013 mmol) and 2 ml AcOH were used. The reaction mixture was stirred at rt for 18 h. After completion of the reaction, the residue was purified by silica gel column chromatography (toluene: petroleum ether= 3: 1). Finally, compound ( 3r ) (36 mg, colorless oil) was isolated in 58% yield.

<sup>1</sup>H-NMR (400 MHz, CDCl<sub>3</sub>) δ (ppm) 10.32 (s, 1H), 8.85 (t, *J* = 1.3 Hz, 1H), 8.69 (d, *J* = 8.4 Hz, 1H), 8.58-8.56 (m, 1H), 7.61-7.57 (m, 2H), 6.90 (d, *J* = 7.4 Hz, 1H), 6.59 (d, *J* = 7.4 Hz, 1H), 6.52 (s, 1H), 4.07 (t, *J* = 12.4 Hz, 4H), 3.97 (t, *J* = 5.8 Hz, 2H), 2.24 (s, 3H), 2.19-2.15 (m, 2H), 2.07 (s, 3H), 1.93-1.89 (m, 2H); <sup>13</sup>C-NMR (100 MHz, CDCl<sub>3</sub>) δ (ppm) 169.65, 156.68, 149.06, 139.25, 136.51, 133.59, 133.08, 130.35, 127.22, 126.07, 125.10, 123.55, 122.60, 120.95, 116.74, 111.83, 66.92, 53.63, 45.86, 29.97, 24.33, 21.43, 15.78; HRMS (ESI) calcd for C<sub>24</sub>H<sub>26</sub>Cl<sub>3</sub>N<sub>2</sub>O<sub>2</sub> [M+H]<sup>+</sup>: 479.10599, found 479.10356

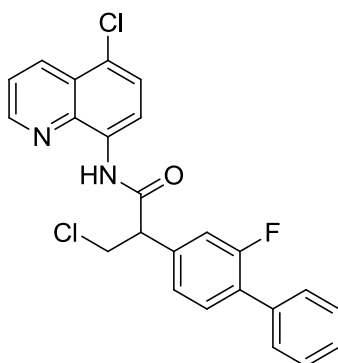**3-Chloro-N-(5-chloroquinolin-8-yl)-2-(2-fluoro-[1,1'-biphenyl]-4-yl)propanamide ( 3s )**

Following the general procedure, substrate (40 mg, 0.1 mmol), NCS (16 mg, 0.12 mmol), Pd(OAc)<sub>2</sub> (2.2 mg, 0.01 mmol) and 2 ml AcOH were used. The reaction mixture was stirred at rt for 36 h. After completion of the reaction, the residue was purified by silica gel column chromatography (toluene: petroleum ether= 2: 1). Finally, compound ( 3s ) (30 mg, white solid) was isolated in 69% yield.

$^1\text{H-NMR}$  (400 MHz,  $\text{CDCl}_3$ )  $\delta$  (ppm) 9.98 (s, 1H), 8.81-8.80 (m, 1H), 8.74 (d,  $J = 8.4$  Hz, 1H), 8.55-8.53 (m, 1H), 7.61-7.33 (m, 10H), 4.39-4.34 (m, 1H), 4.15-4.11 (m, 1H), 3.90-3.86 (m, 1H);  $^{13}\text{C-NMR}$  (100 MHz,  $\text{CDCl}_3$ )  $\delta$  (ppm) 168.56, 161.28, 158.80, 148.95, 139.03, 137.69, 137.62, 135.27, 133.57, 133.38, 131.59, 131.55, 129.39, 129.25, 129.09, 129.06, 128.65, 128.06, 127.26, 126.07, 125.11, 124.23, 124.20, 122.58, 116.80, 116.10, 115.86, 56.63, 45.00; LRMS (ESI) calcd for  $\text{C}_{24}\text{H}_{17}\text{Cl}_2\text{FN}_2\text{O}$   $[\text{M}+\text{H}]^+$ : 439.07, found 438.93

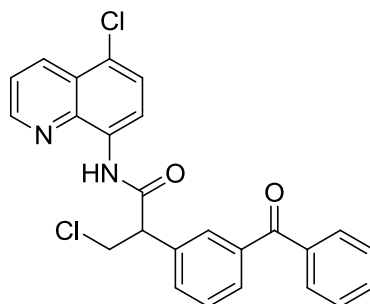

**2-(3-Benzoylphenyl)-3-chloro-N-(5-chloroquinolin-8-yl)propanamide ( 3t )**

Following the general procedure, substrate (41 mg, 0.1 mmol), NCS (27 mg, 0.2 mmol),  $\text{Pd}(\text{OAc})_2$  (2.2 mg, 0.01 mmol) and 2 ml AcOH were used. The reaction mixture was stirred at rt for 60 h. After completion of the reaction, the residue was purified by silica gel column chromatography (toluene: ethyl acetate= 100: 1). Finally, compound ( **3t** ) (16 mg, yellow oil) was isolated in 35% yield.

$^1\text{H-NMR}$  (400 MHz,  $\text{CDCl}_3$ )  $\delta$  (ppm) 9.95 (s, 1H), 8.80-8.78 (m, 1H), 8.71 (d,  $J = 8.4$  Hz, 1H), 8.56-8.54 (m, 1H), 7.94 (t,  $J = 1.7$  Hz, 1H), 7.81-7.75 (m, 4H), 7.60-7.52 (m, 4H), 7.45 (t,  $J = 7.9$  Hz, 2H), 4.39-4.34 (m, 1H), 4.20-4.16 (m, 1H), 3.91-3.86 (m, 1H);  $^{13}\text{C-NMR}$  (100 MHz,  $\text{CDCl}_3$ )  $\delta$  (ppm) 196.28, 168.67, 148.97, 139.01, 138.54, 137.39, 136.91, 133.58, 133.34, 132.84, 131.82, 130.26, 130.07, 129.36, 128.52, 127.24, 126.05, 125.11, 122.61, 116.75, 56.91, 45.09; LRMS (ESI) calcd for  $\text{C}_{25}\text{H}_{18}\text{Cl}_2\text{N}_2\text{O}_2$   $[\text{M}+\text{H}]^+$ : 449.07, found 449.02

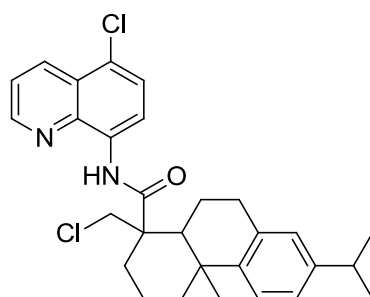

**1-(Chloromethyl)-N-(5-chloroquinolin-8-yl)-7-isopropyl-4a-methyl-1,2,3,4,9,10,10a-octahydrophenanthrene-1-carboxamide ( 3u )**

Following the general procedure, substrate (35 mg, 0.076 mmol), NCS (20 mg, 0.15 mmol),  $\text{Pd}(\text{OAc})_2$  (1.5 mg, 0.007 mmol) and 2ml AcOH were used. The reaction mixture was stirred at rt for 48 h. After completion of the reaction, the residue was purified by silica gel column chromatography (toluene: petroleum ether= 3: 1). Finally, compound ( **3u** ) (21 mg, white solid) was isolated in 56% yield.

$^1\text{H-NMR}$  (400 MHz,  $\text{CDCl}_3$ )  $\delta$  (ppm) 10.46 (s, 1H), 8.86-8.81 (m, 2H), 8.56 (d,  $J = 8.5$  Hz, 1H), 7.62-7.56 (m, 2H), 7.22 (d,  $J = 8.2$  Hz, 1H), 7.04 (d,  $J = 8.0$  Hz, 1H), 6.86 (s, 1H), 4.35 (d,  $J = 11.6$  Hz, 1H), 4.22 (d,  $J = 11.6$  Hz, 1H), 2.88-2.80 (m, 3H), 2.57-2.47 (m, 2H), 2.37 (d,  $J = 12.7$  Hz, 1H),

2.00-1.73 (m, 6H), 1.34 (s, 3H), 1.21 (d,  $J = 6.9$  Hz, 6H);  $^{13}\text{C}$ -NMR (100 MHz,  $\text{CDCl}_3$ )  $\delta$  (ppm) 172.80, 148.94, 146.50, 146.30, 139.51, 134.47, 133.94, 133.48, 127.34, 127.04, 126.04, 124.49, 124.31, 124.26, 122.44, 116.73, 54.16, 47.70, 44.62, 38.31, 37.87, 33.59, 32.24, 30.24, 26.29, 24.09, 24.06, 20.51, 18.72; LRMS (ESI) calcd for  $\text{C}_{29}\text{H}_{32}\text{Cl}_2\text{N}_2\text{O}$   $[\text{M}+\text{H}]^+$ : 495.19, found 495.04

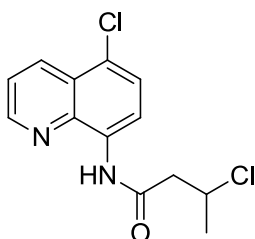

### 3-Chloro-*N*-(5-chloroquinolin-8-yl)butanamide ( **3v** )

Following the general procedure, substrate (25 mg, 0.1 mmol), NCS (27 mg, 0.2 mmol),  $\text{Pd}(\text{OAc})_2$  (2.2 mg, 0.01 mmol) and 2 ml AcOH were used. The reaction mixture was stirred at 55 °C for 2 h. After completion of the reaction, the residue was purified by silica gel column chromatography (petroleum ether: ethyl acetate= 20: 1). Finally, compound ( **3v** ) (8 mg, white solid) were isolated in 28% yield.

$^1\text{H}$ -NMR (400 MHz,  $\text{CDCl}_3$ )  $\delta$  (ppm) 9.85 (s, 1H), 8.85-8.84 (m, 1H), 8.72 (d,  $J = 8.4$  Hz, 1H), 8.57 (dd,  $J = 8.5$  Hz,  $J = 1.2$  Hz, 1H), 7.61-7.56 (m, 2H), 4.68-4.60 (m, 1H), 3.04-2.92 (m, 2H), 1.68 (d,  $J = 6.6$  Hz, 3H);  $^{13}\text{C}$ -NMR (100 MHz,  $\text{CDCl}_3$ )  $\delta$  (ppm) 167.98, 148.88, 139.03, 133.58, 133.55, 127.32, 126.08, 124.81, 122.54, 116.75, 53.73, 48.83, 25.34; HRMS (ESI) calcd for  $\text{C}_{13}\text{H}_{12}\text{Cl}_2\text{N}_2\text{O}$   $[\text{M}+\text{H}]^+$ : 283.04049, found 283.03949

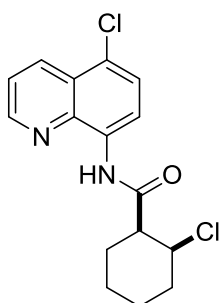

### (2S)-2-chloro-*N*-(5-chloroquinolin-8-yl)cyclohexanecarboxamide ( **3w1** )

Following the general procedure, substrate (57.6 mg, 0.20 mmol), NCS (53 mg, 0.4 mmol),  $\text{Pd}(\text{OAc})_2$  (4.5 mg, 0.02 mmol) and 2 ml AcOH were used. The reaction mixture was stirred at 55 °C for 2 h. After completion of the reaction, the residue was purified by silica gel column chromatography (petroleum ether: ethyl acetate= 30: 1). Finally, compound ( **3w1** ) (13 mg, colorless oil) and compound (8 mg, colorless oil) was isolated in 20% yield and 12% yield.

$^1\text{H}$ -NMR (400 MHz,  $\text{CDCl}_3$ )  $\delta$  (ppm) 10.09 (s, 1H), 8.87 (d,  $J = 3.7$  Hz, 1H), 8.77 (d,  $J = 8.4$  Hz, 1H), 8.57 (d,  $J = 8.4$  Hz, 1H), 7.61-7.56 (m, 2H), 4.94 (s, 1H), 2.85 (d,  $J = 11.8$  Hz, 1H), 2.22-2.15 (m, 2H), 2.08-1.85 (m, 4H), 1.64-1.57 (m, 1H), 1.46-1.38 (m, 1H);  $^{13}\text{C}$ -NMR (100 MHz,  $\text{CDCl}_3$ )  $\delta$  (ppm) 170.74, 148.93, 139.43, 133.62, 133.56, 127.40, 126.11, 124.64, 122.49, 116.75, 60.70, 50.94, 34.31, 24.87, 22.81, 19.92; LRMS (ESI) calcd for  $\text{C}_{16}\text{H}_{16}\text{Cl}_2\text{N}_2\text{O}$   $[\text{M}+\text{H}]^+$ : 323.06, found 322.98



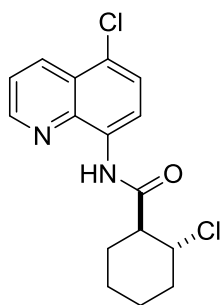

**(2R)-2-chloro-N-(5-chloroquinolin-8-yl)cyclohexanecarboxamide ( 3w2 )**

$^1\text{H-NMR}$  (400 MHz,  $\text{CDCl}_3$ )  $\delta$  (ppm) 9.85 (s, 1H), 8.87-8.86 (m, 1H), 8.78 (d,  $J = 8.4$  Hz, 1H), 8.57 (dd,  $J = 8.5$  Hz,  $J = 1.3$  Hz, 1H), 7.62-7.56 (m, 2H), 4.29-4.23 (m, 1H), 2.71-2.65 (m, 1H), 2.39-2.35 (m, 1H), 2.15-2.11 (m, 1H), 1.88-1.69 (m, 4H), 1.56-1.44 (m, 2H);  $^{13}\text{C-NMR}$  (100 MHz,  $\text{CDCl}_3$ )  $\delta$  (ppm) 171.91, 148.79, 139.12, 133.69, 133.56, 127.36, 126.07, 124.63, 122.47, 116.80, 60.16, 56.41, 36.56, 30.79, 25.96, 24.58; LRMS (ESI) calcd for  $\text{C}_{16}\text{H}_{16}\text{Cl}_2\text{N}_2\text{O}$   $[\text{M}+\text{H}]^+$ : 323.06, found 322.98

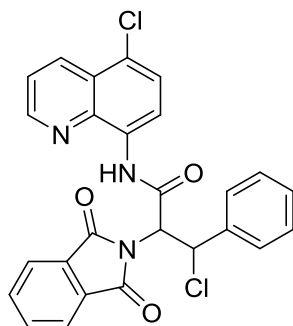

**3-chloro-N-(5-chloroquinolin-8-yl)-2-(1,3-dioxisoindolin-2-yl)-3-phenylpropanamide ( 3x )**

Following the general procedure, substrate (36 mg, 0.1 mmol), NCS (27 mg, 0.2 mmol),  $\text{Pd}(\text{OAc})_2$  (2.2 mg, 0.01 mmol) and 2 ml propanoic acid were used. The reaction mixture was stirred at  $55^\circ\text{C}$  for 8 h. After completion of the reaction, the residue was purified by silica gel column chromatography (toluene: ethyl acetate= 50: 1). Finally, compound ( 3x ) (17 mg, white solid) were isolated in 45% yield.

$^1\text{H-NMR}$  (400 MHz,  $\text{CDCl}_3$ )  $\delta$  (ppm) 10.65 (s, 1H), 8.93 (d,  $J = 2.8$  Hz, 1H), 8.76 (d,  $J = 8.8$  Hz, 1H), 8.57 (d,  $J = 8.8$  Hz, 1H), 7.723-7.717 (m, 2H), 7.64-7.46 (m, 4H), 7.48-7.46 (m, 2H), 7.28-7.20 (m, 3H), 6.27 (d,  $J = 10.8$  Hz, 1H), 5.65 (d,  $J = 10.8$  Hz, 1H);  $^{13}\text{C-NMR}$  (100 MHz,  $\text{CDCl}_3$ )  $\delta$  (ppm) 167.1, 164.3, 149.3, 139.3, 137.2, 134.5, 133.5, 131.2, 129.3, 128.9, 128.0, 127.2, 126.1, 125.4, 123.8, 122.6, 117.3, 60.6, 57.9; LRMS (ESI) calcd for  $\text{C}_{26}\text{H}_{17}\text{Cl}_2\text{N}_3\text{O}_3$   $[\text{M}+\text{H}]^+$ : 390.06, found 390.07

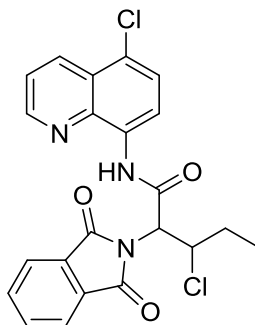

**3-chloro-N-(5-chloroquinolin-8-yl)-2-(1,3-dioxisoindolin-2-yl)pentanamide ( 3y )**

Following the general procedure, substrate (41 mg, 0.1 mmol), NCS (27 mg, 0.2 mmol),  $\text{Pd}(\text{OAc})_2$

(4.4 mg, 0.02 mmol) and 2 ml propanoic acid were used. The reaction mixture was stirred at 55°C for 12 h. After completion of the reaction, the residue was purified by silica gel column chromatography (toluene: ethyl acetate= 50: 1). Finally, compound ( **3y** ) (18 mg, white solid) were isolated in 42% yield.

<sup>1</sup>H-NMR (400 MHz, CDCl<sub>3</sub>) δ (ppm) 10.54 (s, 1H), 8.89 (d, *J* = 2.4 Hz, 1H), 8.69 (d, *J* = 8.8 Hz, 1H), 8.55 (d, *J* = 8.4 Hz, 1H), 7.90-7.89 (m, 2H), 7.77-7.76 (m, 2H), 7.57-7.55 (m, 2H), 5.30-5.21 (m, 2H), 2.00-1.94 (m, 1H), 1.74-1.67 (m, 1H), 1.21 (t, *J* = 7.2 Hz, 1H); <sup>13</sup>C-NMR (100 MHz, CDCl<sub>3</sub>) δ (ppm) 167.7 164.8, 149.2, 139.3, 134.7, 133.4, 131.6, 127.2, 126.1, 125.3, 124.1, 122.6, 117.2, 60.3, 59.5, 27.8, 10.0; LRMS (ESI) calcd for C<sub>22</sub>H<sub>17</sub>Cl<sub>2</sub>N<sub>3</sub>O<sub>3</sub> [M+H]<sup>+</sup>: 442.06, found 442.15

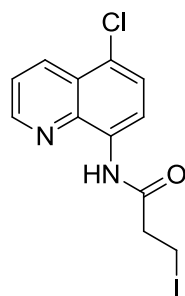

#### ***N*-(5-chloroquinolin-8-yl)-3-iodopropanamide ( **4a** )**

Following the general procedure, substrate (21 mg, 0.1 mmol), NIS (45 mg, 0.2 mmol), Pd(OAc)<sub>2</sub> (2.2 mg, 0.01 mmol) and 2 ml AcOH were used. The reaction mixture was stirred at rt for 24 h. After completion of the reaction, the residue was purified by silica gel column chromatography (petroleum ether: ethyl acetate= 30: 1). Finally, compound ( **4a** ) (16 mg, white solid) were isolated in 45% yield.

<sup>1</sup>H-NMR (400 MHz, CDCl<sub>3</sub>) δ (ppm) 9.80 (s, 1H), 8.85 (d, *J* = 2.9 Hz, 1H), 8.72 (d, *J* = 8.4 Hz, 1H), 8.59-8.57 (m, 1H), 7.62-7.57 (m, 2H), 3.52 (t, *J* = 7.1 Hz, 2H), 3.22 (t, *J* = 7.0 Hz, 2H); LRMS (ESI) calcd for C<sub>12</sub>H<sub>10</sub>ClN<sub>2</sub>O [M+H]<sup>+</sup>: 360.95, found 360.85

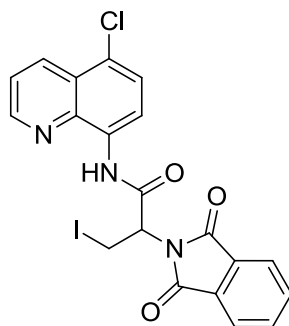

#### ***N*-(5-chloroquinolin-8-yl)-2-(1,3-dioxisoindolin-2-yl)-3-iodopropanamide ( **4b** )**

Following the general procedure, substrate (19 mg, 0.05 mmol), NIS (22 mg, 0.1 mmol), Pd(OAc)<sub>2</sub> (1.1 mg, 0.005 mmol) and 2 ml AcOH were used. The reaction mixture was stirred at 50 °C for 22 h. After completion of the reaction, the residue was purified by silica gel column chromatography (petroleum ether: ethyl acetate= 3: 1). Finally, compound ( **4b** ) (26 mg, white solid) were isolated in 52% yield.

<sup>1</sup>H-NMR (400 MHz, CDCl<sub>3</sub>) δ (ppm) 10.27 (s, 1H), 8.66 (d, *J* = 2.5 Hz, 1H), 8.60 (d, *J* = 8.4 Hz, 1H), 8.51 (d, *J* = 8.1 Hz, 1H), 7.95 (d, *J* = 2.8 Hz, 2H), 7.81 (d, *J* = 2.8 Hz, 2H), 7.56 (d, *J* = 8.4 Hz, 1H), 7.52-7.48 (m, 1H), 5.36-5.29 (m, 1H), 4.29 (t, *J* = 11.0 Hz, 1H), 4.15-4.11 (m, 1H); <sup>13</sup>C-NMR (100 MHz, CDCl<sub>3</sub>) δ (ppm) 167.53, 164.26, 149.08, 139.05, 134.73, 133.52, 132.89, 131.72, 127.17,

126.01, 125.42, 124.11, 122.57, 116.94, 57.30, 0.62; LRMS (ESI) calcd for C<sub>20</sub>H<sub>13</sub>ClIN<sub>3</sub>O<sub>3</sub> [M+H]<sup>+</sup>: 505.97, found 505.86

### Chiral HPLC Data

#### HPLC Conditions:

Chiral stationary phase: CHIRALPAK<sup>®</sup> AD-H, *n*-hexane/isopropanol = 50:50, 0.60 mL/min

Signal: VWD1 A, Wavelength = 254 nm

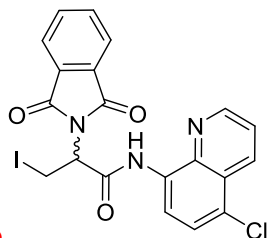

#### DL-4b

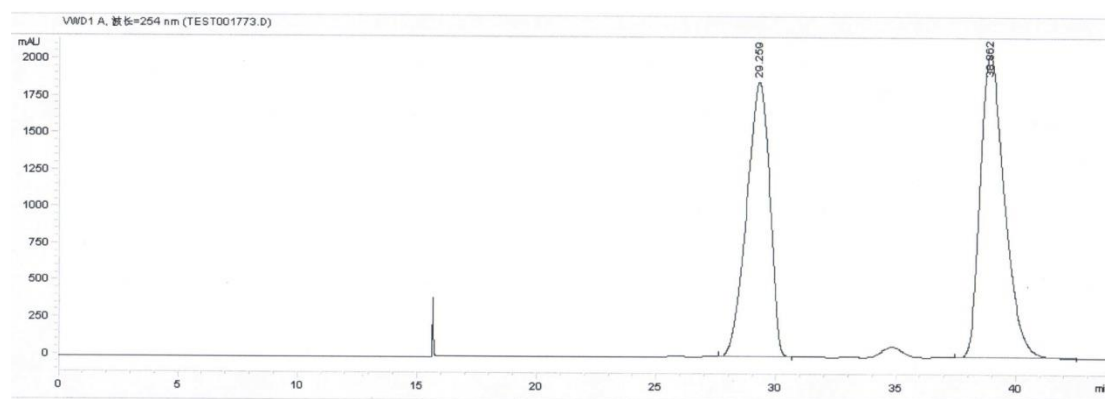

#### Area% report for DL-1a:

| Retention Time (min) | Area     | Area % | Height | Symmetry Factor |
|----------------------|----------|--------|--------|-----------------|
| 29.259               | 126603.9 | 46.322 | 1867.1 | 1.207           |
| 38.862               | 146707.1 | 53.678 | 2048.6 | 0.616           |

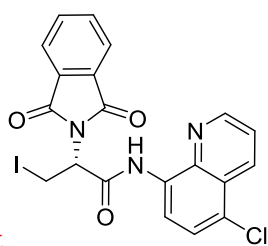

#### L-4b-product

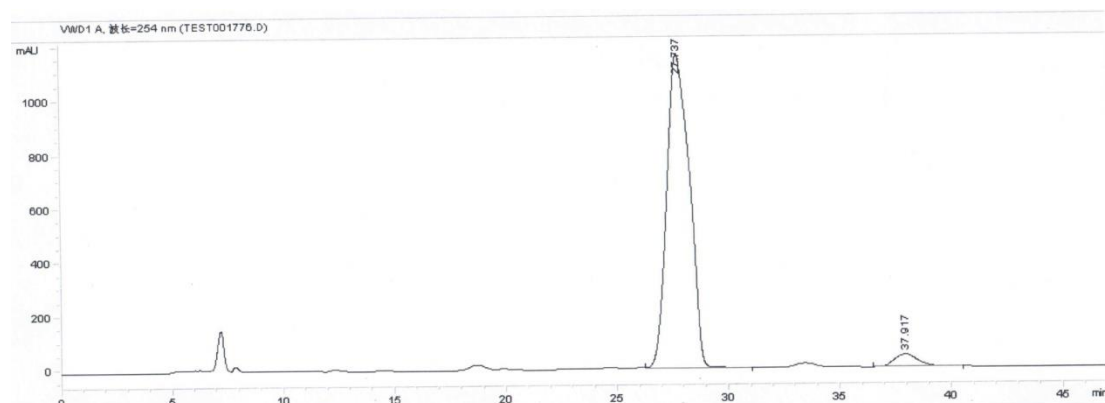

**Area% report for DL-1a:**

| Retention Time (min) | Area    | Area % | Height | Symmetry Factor |
|----------------------|---------|--------|--------|-----------------|
| 27.737               | 82217.7 | 96.079 | 1164.9 | 0.782           |
| 37.917               | 3355.1  | 3.921  | 45.9   | 0.815           |

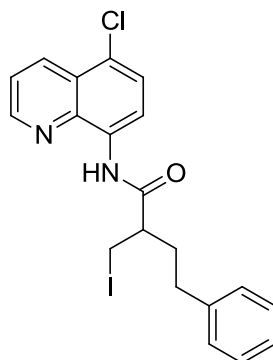**N-(5-chloroquinolin-8-yl)-2-(iodomethyl)-4-phenylbutanamide ( 4c )****0.1mmol scale**

Following the general procedure, substrate (35 mg, 0.12 mmol), NIS (54 mg, 0.24 mmol), Pd(OAc)<sub>2</sub> (2.7 mg, 0.012 mmol) and 2 ml AcOH were used. The reaction mixture was stirred at rt for 36 h. After completion of the reaction, the residue was purified by silica gel column chromatography (toluene: petroleum ether= 3: 1 – 5: 1). Finally, compound ( **4c** ) (32 mg, yellow solid) was isolated in 65% yield.

**3.0mmol scale**

Following the general procedure, substrate (1014 mg, 3.0 mmol), NIS (1.35 g, 6.0 mmol), Pd(OAc)<sub>2</sub> (67 mg, 0.3 mmol) and 10 ml AcOH were used. The reaction mixture was stirred at rt for 22 h. After completion of the reaction, the residue was purified by silica gel column chromatography (toluene: petroleum ether= 3: 1 - 5: 1). Finally, compound ( **4c** ) (890 mg, yellow solid) was isolated in 64% yield.

<sup>1</sup>H-NMR (400 MHz, CDCl<sub>3</sub>) δ (ppm) 9.87 (s, 1H), 8.88 (t, *J* = 2.3 Hz, 1H), 8.78 (d, *J* = 8.3 Hz, 1H), 8.58 (d, *J* = 8.4 Hz, 1H), 7.64-7.58 (m, 2H), 7.28 (t, *J* = 7.6 Hz, 1H), 7.21 (d, *J* = 6.9 Hz, 3H), 3.56 (t, *J* = 9.3 Hz, 1H), 3.34-3.31 (m, 1H), 2.87-2.77 (m, 2H), 2.73-2.67 (m, 1H), 2.25-2.20 (m, 1H), 2.07-2.03 (m, 1H); <sup>13</sup>C-NMR (100 MHz, CDCl<sub>3</sub>) δ (ppm) 171.50, 148.90, 140.75, 139.11, 133.56, 133.31, 128.69, 128.58, 127.32, 126.37, 126.09, 124.93, 122.57, 116.88, 51.21, 35.58, 33.46, 5.73; HRMS (ESI) calcd for C<sub>20</sub>H<sub>19</sub>ClIN<sub>2</sub>O [M+H]<sup>+</sup>: 465.02306, found 465.02154

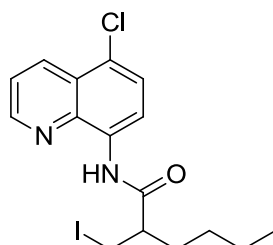**N-(5-chloroquinolin-8-yl)-2-(iodomethyl)hexanamide ( 4d )**

Following the general procedure, substrate (35 mg, 0.12 mmol), NIS (54 mg, 0.24 mmol), Pd(OAc)<sub>2</sub> (2.7 mg, 0.012 mmol) and 2 ml AcOH were used. The reaction mixture was stirred at rt for 36 h. After completion of the reaction, the residue was purified by silica gel column

chromatography (toluene: petroleum ether= 3: 1 - 5: 1). Finally, compound ( **4d** ) (32 mg, colorless oil) was isolated in 64% yield.

<sup>1</sup>H-NMR (400 MHz, CDCl<sub>3</sub>) δ (ppm) 9.86 (s, 1H), 8.87-8.86 (m, 1H), 8.76 (d, *J* = 8.4 Hz, 1H), 8.58-8.55 (m, 1H), 7.61-7.56 (m, 2H), 3.54 (t, *J* = 9.4 Hz, 1H), 3.35-3.31 (m, 1H), 2.88-2.84 (m, 1H), 1.88-1.81 (m, 1H), 1.75-1.65 (m, 1H), 1.44-1.25 (m, 4H), 0.89 (t, *J* = 7.0 Hz, 3H); <sup>13</sup>C-NMR (100 MHz, CDCl<sub>3</sub>) δ (ppm) 171.89, 148.90, 139.14, 133.53, 133.43, 127.32, 126.08, 124.79, 122.50, 116.81, 52.19, 33.91, 29.54, 22.71, 13.94, 5.87; LRMS (ESI) calcd for C<sub>16</sub>H<sub>18</sub>ClIN<sub>2</sub>O [M+H]<sup>+</sup>: 417.02, found 416.94

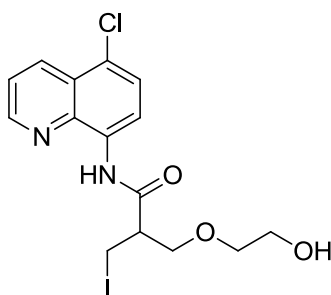

#### ***N*-(5-chloroquinolin-8-yl)-3-(2-hydroxyethoxy)-2-(iodomethyl)propanamide ( **4e** )**

Following the general procedure, substrate (31 mg, 0.1 mmol), NCS (27 mg, 0.2 mmol), Pd(OAc)<sub>2</sub> (4.5 mg, 0.02 mmol) and 1 ml AcOH were used. The reaction mixture was stirred at rt for 48 h. After completion of the reaction, the residue was purified by silica gel column chromatography (petroleum ether: ethyl acetate = 2: 1). Finally, compound ( **4e** ) (24 mg) was isolated in 56% yield.

<sup>1</sup>H-NMR (400 MHz, CD<sub>3</sub>OD) δ (ppm) 8.95-8.94 (m, 1H), 8.66-8.59 (m, 2H), 7.70-7.67 (m, 1H), 7.64 (d, *J* = 8.4 Hz, 1H), 3.90-3.82 (m, 2H), 3.78 (t, *J* = 4.8 Hz, 2H), 3.68 (t, *J* = 5.0 Hz, 2H), 3.54 (d, *J* = 7.1 Hz, 2H), 3.28-3.21 (m, 1H) ; <sup>13</sup>C-NMR (100 MHz, CD<sub>3</sub>OD) δ (ppm) 172.21, 150.61, 140.62, 135.08, 134.21, 128.01, 127.20, 125.96, 123.94, 118.30, 74.10, 73.02, 62.16, 51.69, 1.45; LRMS (ESI) calcd for C<sub>15</sub>H<sub>16</sub>ClIN<sub>2</sub>O<sub>3</sub> [M+H]<sup>+</sup>: 434.99, found 435.37.

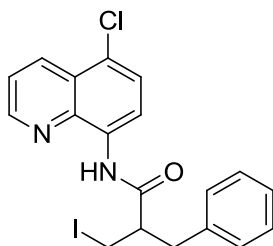

#### **2-Benzyl-*N*-(5-chloroquinolin-8-yl)-3-iodopropanamide ( **4f** )**

Following the general procedure, substrate (32.4 mg, 0.10 mmol), NIS (54 mg, 0.2 mmol), Pd(OAc)<sub>2</sub> (2.2 mg, 0.01 mmol) and 2 ml AcOH were used. The reaction mixture was stirred at rt for 48 h. After completion of the reaction, the residue was purified by silica gel column chromatography (toluene: petroleum ether= 4: 1). Finally, compound ( **4f** ) (25 mg, yellow oil) was isolated in 56% yield.

<sup>1</sup>H-NMR (400 MHz, CDCl<sub>3</sub>) δ (ppm) 9.66 (s, 1H), 8.78-8.71 (m, 2H), 8.54-8.52 (m, 1H), 7.60-7.52 (m, 2H), 7.26-7.21 (m, 4H), 7.17-7.14 (m, 1H), 3.58-3.54 (m, 1H), 3.37-3.33 (m, 1H), 3.18-3.02 (m, 3H); <sup>13</sup>C-NMR (100 MHz, CDCl<sub>3</sub>) δ (ppm) 171.02, 148.75, 139.01, 137.94, 133.43, 133.26, 129.03, 128.84, 127.27, 126.96, 125.98, 124.81, 122.45, 116.76, 53.83, 39.93, 5.29; LRMS (ESI) calcd for C<sub>19</sub>H<sub>17</sub>ClIN<sub>2</sub>O [M+H]<sup>+</sup>: 451.00, found 450.92

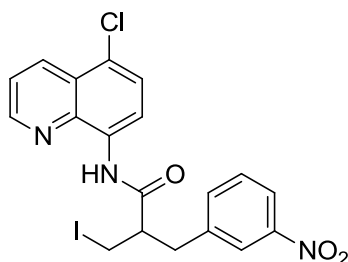

***N*-(5-chloroquinolin-8-yl)-3-iodo-2-(3-nitrobenzyl)propanamide ( **4g** )**

Following the general procedure, substrate (37 mg, 0.10 mmol), NIS (54 mg, 0.2 mmol), Pd(OAc)<sub>2</sub> (2.2 mg, 0.01 mmol) and 2 ml AcOH were used. The reaction mixture was stirred at rt for 48 h. After completion of the reaction, the residue was purified by silica gel column chromatography (petroleum ether: ethyl acetate= 10: 1). Finally, compound ( **4g** ) (25 mg, white solid) was isolated in 50% yield.

<sup>1</sup>H-NMR (400 MHz, (CD<sub>3</sub>)<sub>2</sub>SO) δ (ppm) 10.36 (s, 1H), 8.97 (d, *J* = 4.1 Hz, 1H), 8.59-8.56 (m, 2H), 8.24 (s, 1H), 8.00 (d, *J* = 8.2 Hz, 1H), 7.80-7.73 (m, 3H), 7.52 (t, *J* = 7.9 Hz, 1H), 3.81-3.77 (m, 1H), 3.45 (t, *J* = 9.6 Hz, 1H), 3.30-3.28 (m, 1H), 3.15-3.02 (m, 2H); <sup>13</sup>C-NMR (100 MHz, (CD<sub>3</sub>)<sub>2</sub>SO) δ (ppm) 171.39, 149.62, 147.79, 140.58, 138.99, 136.05, 133.82, 132.83, 129.70, 127.00, 125.32, 123.77, 123.56, 123.30, 121.49, 117.55, 50.05, 38.55, 6.33; LRMS (ESI) calcd for C<sub>19</sub>H<sub>15</sub>ClIN<sub>3</sub>O<sub>3</sub> [M+H]<sup>+</sup>: 495.98, found 495.77

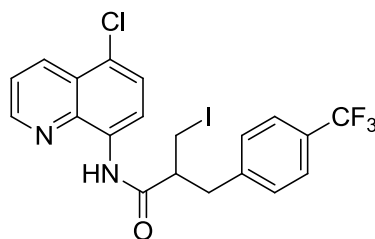

***N*-(5-chloroquinolin-8-yl)-3-iodo-2-(4-(trifluoromethyl)benzyl)propanamide ( **4h** )**

Following the general procedure, substrate (40 mg, 0.1 mmol), NIS (45 mg, 0.2 mmol), Pd(OAc)<sub>2</sub> (3.4 mg, 0.015 mmol) and 1 ml AcOH were used. The reaction mixture was stirred at rt for 48 h. After completion of the reaction, the residue was purified by silica gel column chromatography (petroleum ether: ethyl acetate = 6: 1). Finally, compound ( **4h** ) (37 mg) was isolated in 71% yield.

<sup>1</sup>H-NMR (400 MHz, CDCl<sub>3</sub>) δ (ppm) 9.55 (s, 1H), 8.73-8.66 (m, 2H), 8.54-8.51 (m, 1H), 7.59-7.51 (m, 2H), 7.46 (d, *J* = 8.0 Hz, 2H), 7.35 (d, *J* = 8.0 Hz, 2H), 3.61-3.57 (m, 1H), 3.37-3.34 (m, 1H), 3.21-3.09 (m, 3H); <sup>13</sup>C-NMR (100 MHz, CDCl<sub>3</sub>) δ (ppm) 170.35, 148.82, 142.20, 138.92, 133.48, 133.00, 129.40, 129.32 (q, *J*<sub>C-F</sub> = 32 Hz), 127.21, 126.00, 125.78 (q, *J*<sub>C-F</sub> = 4 Hz), 125.09, 124.19 (q, *J*<sub>C-F</sub> = 290 Hz), 122.53, 116.81, 53.68, 39.69, 4.87; LRMS (ESI) calcd for C<sub>20</sub>H<sub>15</sub>ClF<sub>3</sub>IN<sub>2</sub>O [M+H]<sup>+</sup>: 518.99, found 518.88.

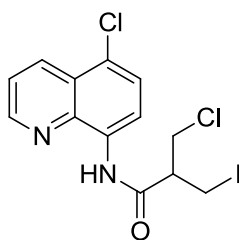

**3-Chloro-N-(5-chloroquinolin-8-yl)-2-(iodomethyl)propanamide ( 4i )**

Following the general procedure, substrate (29 mg, 0.1 mmol), NIS (57 mg, 0.25 mmol), Pd(OAc)<sub>2</sub> (2.3 mg, 0.01 mmol) and 1 ml AcOH were used. The reaction mixture was stirred at rt for 48 h. After completion of the reaction, the residue was purified by silica gel column chromatography (toluene: petroleum ether= 4: 1). Finally, compound ( **4i** ) (26 mg) was isolated in 64% yield.

<sup>1</sup>H-NMR (400 MHz, CDCl<sub>3</sub>) δ (ppm) 10.01 (s, 1H), 8.87 (s, 1H), 8.72 (d, *J* = 8.2 Hz, 1H), 8.57 (d, *J* = 8.4 Hz, 1H), 7.62-7.57 (m, 2H), 3.96-3.92 (m, 1H), 3.85-3.81 (m, 1H), 3.60-3.56 (m, 1H), 3.49-3.45 (m, 1H), 3.23-3.20 (m, 1H); <sup>13</sup>C-NMR (100 MHz, CDCl<sub>3</sub>) δ (ppm) 168.48, 149.04, 139.06, 133.61, 133.06, 127.25, 126.08, 125.32, 122.65, 117.00, 53.58, 45.10, 1.37; LRMS (ESI) calcd for C<sub>13</sub>H<sub>11</sub>Cl<sub>2</sub>IN<sub>2</sub>O [M+H]<sup>+</sup>: 408.93, found 408.85.

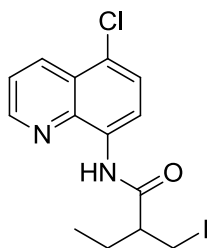

**N-(5-chloroquinolin-8-yl)-2-(iodomethyl)butanamide ( 4j )**

Following the general procedure, substrate (26.2 mg, 0.1 mmol), NIS (45 mg, 0.2 mmol), Pd(OAc)<sub>2</sub> (2.2 mg, 0.01 mmol) and 2 ml AcOH were used. The reaction mixture was stirred at rt for 35 h. After completion of the reaction, the residue was purified by silica gel column chromatography (toluene: petroleum ether= 3: 1). Finally, compound ( **4j** ) ( 23 mg, white solid) were isolated in 60% yield.

<sup>1</sup>H-NMR (400 MHz, CDCl<sub>3</sub>) δ (ppm) 9.87 (s, 1H), 8.87 (d, *J* = 4.1 Hz, 1H), 8.76 (d, *J* = 8.4 Hz, 1H), 8.57 (d, *J* = 8.5 Hz, 1H), 7.62-7.56 (m, 2H), 3.54 (t, *J* = 9.1 Hz, 1H), 3.36-3.32 (m, 1H), 2.83-2.79 (m, 1H), 1.92-1.76 (m, 2H), 1.05 (t, *J* = 7.4 Hz, 3H); <sup>13</sup>C-NMR (100 MHz, CDCl<sub>3</sub>) δ (ppm) 171.77, 148.91, 139.12, 133.57, 133.41, 127.33, 126.08, 124.81, 122.53, 116.80, 53.61, 27.33, 11.91, 5.50; LRMS (ESI) calcd for C<sub>14</sub>H<sub>14</sub>ClIN<sub>2</sub>O [M+H]<sup>+</sup>: 388.98, found 388.87

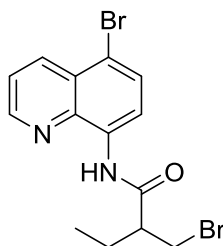

**2-(bromomethyl)-N-(5-bromoquinolin-8-yl)butanamide ( 4k1 )**

Following the general procedure, substrate (61 mg, 0.2 mmol), NBS (53 mg, 0.3 mmol), Pd(OAc)<sub>2</sub> (4.5 mg, 0.02 mmol) and 2ml AcOH were used. The reaction mixture was stirred at rt for 48h. After completion of the reaction, the residue was purified by silical gel column chromatography (petroleum ether: ethyl acetate = 20:1 then toluene: petroleum ether = 3:1 ). Finally, compound ( **4k1** ) (16 mg, white solid) and compound ( **4k2** ) (23mg, white solid) were isolated in 22% yield and 23% yield.

<sup>1</sup>H-NMR (400 MHz, CDCl<sub>3</sub>) δ (ppm) 9.93 (s, 1H), 8.85 (dd, *J* = 4.2 Hz, *J* = 1.6 Hz, 1H), 8.72 (d, *J* = 8.4 Hz, 1H), 8.54 (dd, *J* = 8.5 Hz, *J* = 1.6 Hz, 1H), 7.81 (d, *J* = 8.4 Hz, 1H), 7.60-7.57 (m, 1H), 3.78-3.73 (m, 1H), 3.55-3.53 (m, 1H), 2.88-2.84 (m, 1H), 1.93-1.76 (m, 2H), 1.05 (t, *J* = 7.5 Hz, 3H); <sup>13</sup>C-NMR (100 MHz, CDCl<sub>3</sub>) δ (ppm) 171.62, 148.95, 139.3, 136.2, 134.1, 131.0, 127.4, 122.9, 117.4, 114.8, 53.3, 32.9, 25.6, 11.9; LRMS (ESI) calcd for C<sub>14</sub>H<sub>14</sub>Br<sub>2</sub>N<sub>2</sub>O [M+H]<sup>+</sup>: 386.95, found 386.82

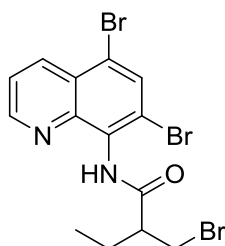

**2-(bromomethyl)-N-(5,7-dibromoquinolin-8-yl)butanamide ( 4k2 )**

<sup>1</sup>H-NMR (400 MHz, CDCl<sub>3</sub>) δ (ppm) 8.88-8.87 (m, 1H), 8.49-8.47 (m, 1H), 8.38 (s, 1H), 8.06 (s, 1H), 7.57-7.54 (m, 1H), 3.80-3.76 (m, 1H), 3.56-3.52 (m, 1H), 2.91-2.87 (m, 1H), 1.97-1.82 (m, 2H), 1.16 (t, *J* = 7.5 Hz, 3H); <sup>13</sup>C-NMR (100 MHz, CDCl<sub>3</sub>) δ (ppm) 171.1, 150.9, 144.0, 136.0, 134.4, 133.6, 127.0, 122.9, 120.4, 119.4, 32.9, 31.1, 25.6, 11.9; LRMS (ESI) calcd for C<sub>14</sub>H<sub>13</sub>Br<sub>3</sub>N<sub>2</sub>O [M+H]<sup>+</sup>: 466.85, found 466.72

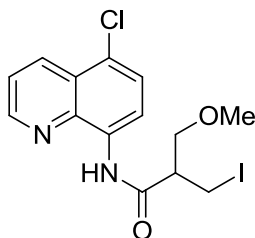

**N-(5-chloroquinolin-8-yl)-3-iodo-2-(methoxymethyl)propanamide ( 4l )**

Following the general procedure, substrate (28 mg, 0.1 mmol), NCS (27 mg, 0.2 mmol), Pd(OAc)<sub>2</sub> (4.5 mg, 0.02 mmol) and 1 ml AcOH were used. The reaction mixture was stirred at 50 °C for 8 h. After completion of the reaction, the residue was purified by silica gel column chromatography (toluene: petroleum ether= 2: 1). Finally, compound ( **4l** ) (21.5 mg) was isolated in 53% yield.

<sup>1</sup>H-NMR (400 MHz, CD<sub>3</sub>OD) δ (ppm) 8.71-8.70 (m, 1H), 8.49 (d, *J* = 8.4 Hz, 1H), 8.40-8.37 (m, 1H), 7.44-7.40 (m, 2H), 3.66-3.57 (m, 2H), 3.38-3.28 (m, 5H), 2.95-2.88 (m, 1H) ; <sup>13</sup>C-NMR (100 MHz, CD<sub>3</sub>OD) δ (ppm) 170.03, 148.83, 139.02, 133.26, 133.13, 126.80, 125.81, 124.77, 122.31, 116.70, 72.96, 58.96, 50.34, 0.77; LRMS (ESI) calcd for C<sub>14</sub>H<sub>14</sub>ClIN<sub>2</sub>O<sub>2</sub> [M+H]<sup>+</sup>: 404.98, found 405.34.



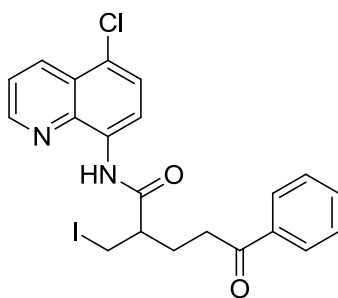

***N*-(5-chloroquinolin-8-yl)-2-(iodomethyl)-5-oxo-5-phenylpentanamide ( 4m )**

Following the general procedure, substrate (47 mg, 0.13 mmol), NIS (58 mg, 0.26 mmol), Pd(OAc)<sub>2</sub> (3 mg, 0.013 mmol) and 2ml AcOH were used. The reaction mixture was stirred at rt for 60 h. After completion of the reaction, the residue was purified by silica gel column chromatography (toluene: ethyl acetate= 60: 1). Finally, compound ( 4m ) (35 mg, white solid) was isolated in 55% yield.

<sup>1</sup>H-NMR (400 MHz, CDCl<sub>3</sub>) δ (ppm) 9.91 (s, 1H), 8.78-8.72 (m, 2H), 8.55-8.53 (m, 1H), 7.90 (d, *J* = 7.4 Hz, 2H), 7.60 (d, *J* = 8.4 Hz, 1H), 7.56-7.47 (m, 2H), 7.37 (t, *J* = 7.8 Hz, 2H), 3.58 (t, *J* = 9.4 Hz, 1H), 3.39-3.36 (m, 1H), 3.19-3.06 (m, 3H), 2.28-2.22 (m, 2H); <sup>13</sup>C-NMR (100 MHz, CDCl<sub>3</sub>) δ (ppm) 199.03, 171.31, 148.93, 139.08, 136.68, 133.46, 133.32, 133.27, 128.67, 128.13, 127.22, 126.03, 124.99, 122.52, 116.90, 50.69, 35.49, 28.31, 5.06; LRMS (ESI) calcd for C<sub>21</sub>H<sub>18</sub>ClIN<sub>2</sub>O<sub>2</sub> [M+H]<sup>+</sup>: 493.01, found 492.90

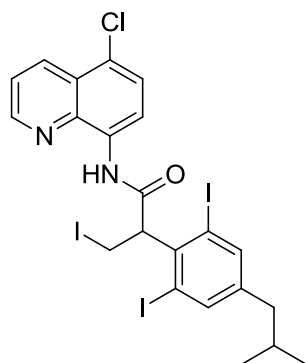

***N*-(5-chloroquinolin-8-yl)-2-(2,6-diiodo-4-isobutylphenyl)-3-iodopropanamide ( 4n )**

Following the general procedure, substrate (37 mg, 0.1 mmol), NIS (45 mg, 0.2 mmol), Pd(OAc)<sub>2</sub> (2.2 mg, 0.01 mmol) and 2 ml AcOH were used. The reaction mixture was stirred at rt for 48 h. After completion of the reaction, the residue was purified by silica gel column chromatography (petroleum ether: ethyl acetate= 20: 1). Finally, compound ( 4n ) (30 mg, white solid) was isolated in 40% yield.

<sup>1</sup>H-NMR (400 MHz, CDCl<sub>3</sub>) δ (ppm) 9.66 (s, 1H), 8.67 (d, *J* = 8.4 Hz, 1H), 8.54-8.48 (m, 2H), 7.92 (s, 1H), 7.73 (s, 1H), 7.59 (d, *J* = 8.4 Hz, 1H), 7.48-7.45 (m, 1H), 5.12-5.08 (m, 1H), 4.24-4.20 (m, 1H), 4.06 (t, *J* = 9.5 Hz, 1H), 2.42(d, *J* = 7.3 Hz, 2H), 1.97-1.87 (m, 1H), 0.97-0.95 (m, 6H); <sup>13</sup>C-NMR (100 MHz, CDCl<sub>3</sub>) δ (ppm) 167.66, 148.76, 145.69, 143.44, 141.39, 139.17, 138.82, 133.70, 133.33, 127.29, 126.02, 124.70, 122.38, 116.36, 106.32, 94.87, 62.62, 43.68, 30.15, 22.38, 22.33, 2.30; HRMS (ESI) calcd for C<sub>22</sub>H<sub>20</sub>ClI<sub>3</sub>N<sub>2</sub>O [M+H]<sup>+</sup>: 744.84765, found 744.84489

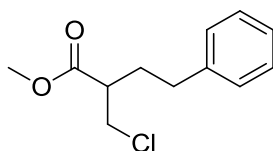

#### Methyl 2-(chloromethyl)-4-phenylbutanoate ( **5a** )

Following the general procedure, substrate (37 mg, 0.1 mmol),  $\text{BF}_3 \cdot \text{Et}_2\text{O}$  (63  $\mu\text{L}$ , 0.5 mmol) and 1 ml MeOH were used. The reaction mixture was stirred at 100 °C for 24 h. After completion of the reaction, the residue was purified by silica gel column chromatography (petroleum ether: ethyl acetate= 50: 1 - 10: 1). Finally, ester ( **5a** ) (21 mg, colorless oil) and amine (17 mg, yellow solid) was isolated in 92% yield and 95% yield respectively.

Following the general procedure, substrate (37 mg, 0.1 mmol),  $\text{H}_2\text{SO}_4$  (27  $\mu\text{L}$ , 0.5 mmol) and 1 ml MeOH were used. The reaction mixture was stirred at 100 °C for 24 h. After completion of the reaction, the residue was purified by silica gel column chromatography (petroleum ether: ethyl acetate= 50: 1 - 10: 1). Finally, ester ( **5a** ) (20 mg, colorless oil) and amine (17 mg, yellow solid) was isolated in 90% yield and 95% yield respectively.

$^1\text{H-NMR}$  (400 MHz,  $\text{CDCl}_3$ )  $\delta$  (ppm) 7.32-7.26 (m, 2H), 7.23-7.17 (m, 3H), 3.77-3.72 (m, 4H), 3.67-3.63 (m, 1H), 2.84-2.77 (m, 1H), 2.70-2.61 (m, 2H), 2.12-2.02 (m, 1H), 1.97-1.88 (m, 1H);  $^{13}\text{C-NMR}$  (100 MHz,  $\text{CDCl}_3$ )  $\delta$  (ppm) 173.44, 140.88, 128.64, 128.52, 126.35, 52.16, 47.48, 44.55, 33.15, 31.60

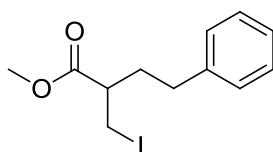

#### Methyl 2-(iodomethyl)-4-phenylbutanoate ( **5b** )

Following the general procedure, substrate (46 mg, 0.1 mmol),  $\text{BF}_3 \cdot \text{Et}_2\text{O}$  (63  $\mu\text{L}$ , 0.5 mmol) and 1 ml MeOH were used. The reaction mixture was stirred at 100 °C for 24 h. After completion of the reaction, the residue was purified by silica gel column chromatography (petroleum ether: ethyl acetate= 50: 1 - 10: 1). Finally, ester ( **5b** ) (30 mg, colorless oil) and amine (13 mg, yellow solid) was isolated in 94% yield and 73% yield respectively.

Following the general procedure, substrate (37 mg, 0.1 mmol),  $\text{H}_2\text{SO}_4$  (27  $\mu\text{L}$ , 0.5 mmol) and 1 ml MeOH were used. The reaction mixture was stirred at 100 °C for 24 h. After completion of the reaction, the residue was purified by silica gel column chromatography (petroleum ether: ethyl acetate= 50: 1 - 10: 1). Finally, ester ( **5b** ) (29 mg, colorless oil) and amine (17 mg, yellow solid) was isolated in 90% yield and 95% yield respectively.

$^1\text{H-NMR}$  (400 MHz,  $\text{CDCl}_3$ )  $\delta$  (ppm) 7.31-7.26 (m, 2H), 7.22-7.17 (m, 3H), 3.74 (s, 3H), 3.39-3.28 (m, 2H), 2.78-2.71 (m, 1H), 2.67-2.62 (m, 2H), 2.12-2.02 (m, 1H), 1.94-1.85 (m, 1H);  $^{13}\text{C-NMR}$  (100 MHz,  $\text{CDCl}_3$ )  $\delta$  (ppm) 173.55, 140.87, 128.66, 128.54, 126.36, 52.20, 47.51, 34.68, 33.17, 4.94

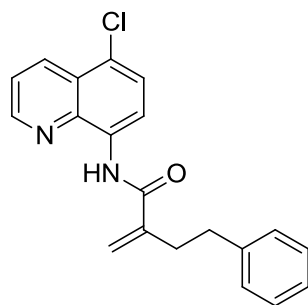

***N*-(5-chloroquinolin-8-yl)-2-methylene-4-phenylbutanamide ( 6a )**

<sup>1</sup>H-NMR (400 MHz, CDCl<sub>3</sub>) δ (ppm) 10.28 (s, 1H), 8.83 (d, *J* = 3.5 Hz, 1H), 8.76 (d, *J* = 8.4 Hz, 1H), 8.54 (d, *J* = 8.4 Hz, 1H), 7.61-7.53 (m, 2H), 7.31-7.27 (m, 4H), 7.20 (d, *J* = 6.5 Hz, 1H), 5.98 (s, 1H), 5.50 (s, 1H), 2.91 (t, *J* = 6.8 Hz, 2H), 2.81 (t, *J* = 6.8 Hz, 2H); <sup>13</sup>C-NMR (100 MHz, CDCl<sub>3</sub>) δ (ppm) 166.53, 148.80, 145.06, 141.36, 139.27, 133.84, 133.52, 128.65, 128.51, 127.36, 126.15, 126.05, 124.51, 122.46, 119.94, 116.51, 35.01, 34.55; LRMS (ESI) calcd for C<sub>20</sub>H<sub>17</sub>ClN<sub>2</sub>O [M+H]<sup>+</sup>: 337.10, found 337.16

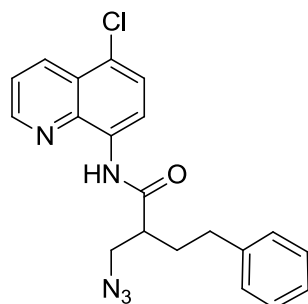

**2-(Azidomethyl)-*N*-(4-chloronaphthalen-1-yl)-4-phenylbutanamide ( 6b )**

<sup>1</sup>H-NMR (400 MHz, CDCl<sub>3</sub>) δ (ppm) 9.93 (s, 1H), 8.88-8.87 (m, 1H), 8.77 (d, *J* = 8.4 Hz, 1H), 8.59-8.57 (m, 1H), 7.63-7.57 (m, 2H), 7.30-7.20 (m, 5H), 3.81-3.76 (m, 1H), 3.54-3.50 (m, 1H), 2.84-2.65 (m, 3H), 2.24-2.14 (m, 1H), 1.98-1.90 (m, 1H); <sup>13</sup>C-NMR (100 MHz, CDCl<sub>3</sub>) δ (ppm) 171.61, 148.91, 140.86, 139.12, 133.55, 133.48, 128.70, 128.58, 127.32, 126.37, 126.08, 124.88, 122.55, 116.87, 53.45, 48.02, 33.32, 31.99; LRMS (ESI) calcd for C<sub>20</sub>H<sub>19</sub>ClN<sub>5</sub>O [M+H]<sup>+</sup>: 380.12, found 379.95

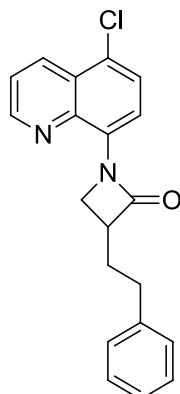

**1-(5-Chloroquinolin-8-yl)-3-phenethylazetidin-2-one ( 6c )**

To a 10 mL sealed tube were added *N*-(5-chloroquinolin-8-yl)-2-(iodomethyl)-4-phenylbutanamide (93 mg, 0.2 mmol), NaSMe (267mg, 0.4 mmol) and DMF (0.5 mL). The tube was sealed at rt for 1.5 h. H<sub>2</sub>O was added to

dilute the reaction mixture. Then reaction mixture was extracted by DCM for three times, the organic layer dried over anhydrous  $\text{Na}_2\text{SO}_4$  and concentrated on rotavapor under reduced pressure. Finally, the residue was purified by silica gel column chromatography (petroleum ether: ethylacetate = 20: 1). Finally, compound (**6c**) (31 mg) was isolated in 46% yield.

$^1\text{H-NMR}$  (400 MHz,  $\text{CDCl}_3$ )  $\delta$  (ppm) 8.86-8.84 (m, 1H), 8.55-8.52 (m, 1H), 8.42 (d,  $J = 8.4$  Hz, 1H), 7.57-7.49 (m, 2H), 7.33-7.29 (m, 2H), 7.25-7.19 (m, 3H), 4.60-4.57 (m, 1H), 4.22-4.19 (m, 1H), 3.45-3.39 (m, 1H), 2.86 (t,  $J = 7.1$  Hz, 2H), 2.34-2.24 (m, 1H), 2.14-2.05 (m, 1H);  $^{13}\text{C-NMR}$  (100 MHz,  $\text{CDCl}_3$ )  $\delta$  (ppm) 170.21, 149.03, 141.32, 140.98, 134.42, 132.94, 128.67, 128.63, 126.89, 126.76, 126.26, 125.35, 122.10, 119.15, 52.10, 50.67, 33.58, 31.06; LRMS (ESI) calcd for  $\text{C}_{20}\text{H}_{17}\text{ClN}_2\text{O}$   $[\text{M}+\text{H}]^+$ : 337.10, found 337.41.

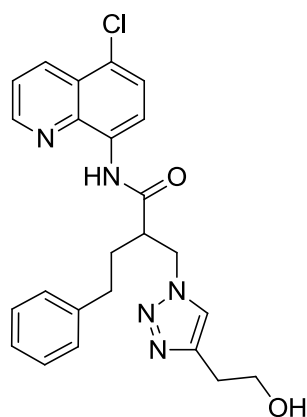

***N*-(5-chloroquinolin-8-yl)-2-((4-(2-hydroxyethyl)-2,3-dihydro-1H-1,2,3-triazol-1-yl)methyl)-4-phenylbutanamide (6c)**

$^1\text{H-NMR}$  (400 MHz,  $\text{CDCl}_3$ )  $\delta$  (ppm) 9.72 (s, 1H), 8.83-8.82 (m, 1H), 8.67 (d,  $J = 8.4$  Hz, 1H), 8.57-8.54 (m, 1H), 7.60-7.56 (m, 2H), 7.40 (s, 1H), 7.28-7.17 (m, 5H), 4.73-4.68 (m, 1H), 4.59-4.54 (m, 1H), 3.75 (s, 2H), 3.24-3.19 (m, 1H), 2.88-2.69 (m, 4H), 2.50 (s, 1H), 2.27-2.18 (m, 1H), 2.01-1.93 (m, 1H);  $^{13}\text{C-NMR}$  (100 MHz,  $\text{CDCl}_3$ )  $\delta$  (ppm) 171.16, 149.04, 140.45, 138.92, 133.52, 133.08, 128.77, 128.55, 127.12, 126.50, 126.04, 125.24, 122.69, 116.73, 61.66, 51.84, 49.00, 33.19, 32.39, 28.59; LRMS (ESI) calcd for  $\text{C}_{24}\text{H}_{25}\text{ClN}_5\text{O}_2$   $[\text{M}+\text{H}]^+$ : 450.16, found 450.09

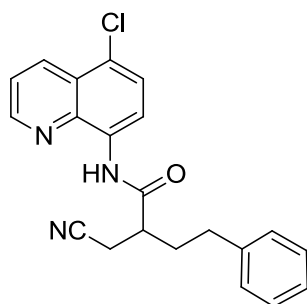

***N*-(5-chloroquinolin-8-yl)-2-(cyanomethyl)-4-phenylbutanamide (6e)**

$^1\text{H-NMR}$  (400 MHz,  $\text{CDCl}_3$ )  $\delta$  (ppm) 9.92 (s, 1H), 8.87 (d,  $J = 3.9$  Hz, 1H), 8.72 (d,  $J = 8.4$  Hz, 1H), 8.60 (d,  $J = 8.5$  Hz, 1H), 7.64-7.59 (m, 2H), 7.31-7.21 (m, 5H), 2.90-2.80 (m, 3H), 2.75-2.66 (m, 2H), 2.30-2.23 (m, 1H), 2.17-2.10 (m, 1H);  $^{13}\text{C-NMR}$  (100 MHz,  $\text{CDCl}_3$ )  $\delta$  (ppm) 170.50, 149.00, 140.21, 139.08, 133.68, 133.13, 128.84, 128.59, 127.30, 126.59, 126.14, 125.30, 122.70, 118.03, 117.00, 44.07, 34.03, 33.00, 20.53; LRMS (ESI) calcd for  $\text{C}_{21}\text{H}_{19}\text{ClN}_3\text{O}$   $[\text{M}+\text{H}]^+$ : 364.11, found 363.96

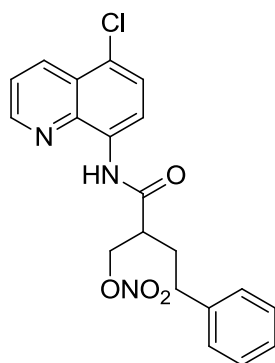

**2-((5-Chloroquinolin-8-yl)carbamoyl)-4-phenylbutyl nitrate ( 6f )**

$^1\text{H-NMR}$  (400 MHz,  $\text{CDCl}_3$ )  $\delta$  (ppm) 9.90 (s, 1H), 8.88-8.87 (m, 1H), 8.73 (d,  $J = 8.4$  Hz, 1H), 8.60 (d,  $J = 8.5$  Hz, 1H), 7.64-7.59 (m, 2H), 7.30-7.20 (m, 5H), 4.87-4.82 (m, 1H), 4.61-4.57 (m, 1H), 2.93-2.80 (m, 2H), 2.76-2.70 (m, 1H), 2.26-2.21 (m, 1H), 2.04-1.97 (m, 1H);  $^{13}\text{C-NMR}$  (100 MHz,  $\text{CDCl}_3$ )  $\delta$  (ppm) 170.17, 148.98, 140.40, 139.06, 133.63, 133.25, 128.80, 128.58, 127.28, 126.55, 126.12, 125.18, 122.65, 116.94, 45.53, 33.12, 31.10; LRMS (ESI) calcd for  $\text{C}_{20}\text{H}_{18}\text{ClN}_3\text{O}_4$   $[\text{M}+\text{H}]^+$ : 400.10, found 400.03

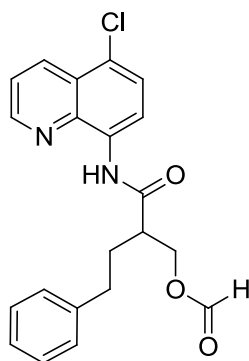

**2-((5-Chloroquinolin-8-yl)carbamoyl)-4-phenylbutyl formate ( 6g )**

$^1\text{H-NMR}$  (400 MHz,  $\text{CDCl}_3$ )  $\delta$  (ppm) 9.91 (s, 1H), 8.88-8.86 (m, 1H), 8.76 (d,  $J = 8.4$  Hz, 1H), 8.61-8.58 (m, 1H), 8.03 (s, 1H), 7.64-7.58 (m, 2H), 7.30-7.20 (m, 5H), 4.49-4.40 (m, 2H), 2.91-2.78 (m, 2H), 2.75-2.69 (m, 1H), 2.24-2.16 (m, 1H), 1.99-1.91 (m, 1H);  $^{13}\text{C-NMR}$  (100 MHz,  $\text{CDCl}_3$ )  $\delta$  (ppm) 171.27, 160.73, 148.91, 140.86, 139.13, 133.63, 133.53, 128.72, 128.61, 127.36, 126.40, 126.13, 124.91, 122.58, 116.87, 64.80, 47.19, 33.31, 30.93; LRMS (ESI) calcd for  $\text{C}_{21}\text{H}_{19}\text{ClN}_3\text{O}_3$   $[\text{M}+\text{H}]^+$ : 383.11, found 383.02

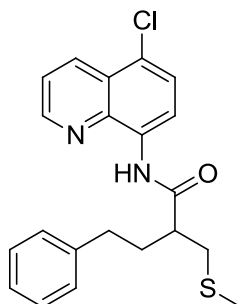

**N-(5-chloroquinolin-8-yl)-2-((methylthio)methyl)-4-phenylbutanamide ( 6h )**

$^1\text{H-NMR}$  (400 MHz,  $\text{CDCl}_3$ )  $\delta$  (ppm) 9.91 (s, 1H), 8.88 (d,  $J = 4.1$  Hz, 1H), 8.79 (d,  $J = 8.4$  Hz, 1H), 8.58 (d,  $J = 8.5$  Hz, 1H), 7.63-7.57 (m, 2H), 7.29-7.17 (m, 5H), 3.00-2.95 (m, 1H), 2.80-2.66 (m, 4H), 2.26-2.17 (m, 1H), 2.11 (s, 3H), 2.08-2.02 (m, 1H);  $^{13}\text{C-NMR}$  (100 MHz,  $\text{CDCl}_3$ )  $\delta$  (ppm) 172.91,

148.84, 141.24, 139.16, 133.65, 133.53, 128.60, 127.36, 126.20, 126.09, 124.65, 122.50, 116.76, 48.64, 37.28, 34.26, 33.57, 16.54; LRMS (ESI) calcd for C<sub>21</sub>H<sub>21</sub>ClN<sub>2</sub>OS [M+H]<sup>+</sup>: 385.11, found 385.02

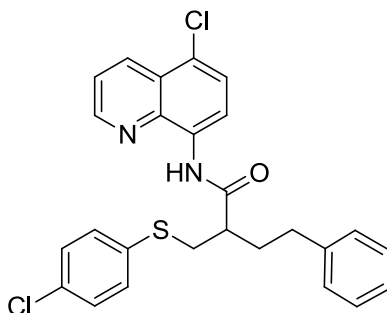

**2-(((4-Chlorophenyl)thio)methyl)-N-(5-chloroquinolin-8-yl)-4-phenylbutanamide ( 6i )**

<sup>1</sup>H-NMR (400 MHz, CDCl<sub>3</sub>) δ (ppm) 9.77 (s, 1H), 8.87-8.85 (m, 1H), 8.71 (d, *J* = 8.4 Hz, 1H), 8.60-8.58 (m, 1H), 7.62-7.58 (m, 2H), 7.28-7.14 (m, 10H), 3.36-3.31 (m, 1H), 3.12-3.07 (m, 1H), 2.80-2.73 (m, 1H), 2.69-2.60 (m, 2H), 2.28-2.19 (m, 1H), 2.05-1.98 (m, 1H); <sup>13</sup>C-NMR (100 MHz, CDCl<sub>3</sub>) δ (ppm) 172.29, 148.80, 141.04, 139.08, 134.00, 133.59, 133.43, 132.73, 131.87, 129.21, 128.64, 128.57, 127.35, 126.27, 126.08, 124.77, 122.54, 116.80, 48.20, 37.26, 34.24, 33.49; LRMS (ESI) calcd for C<sub>26</sub>H<sub>23</sub>Cl<sub>2</sub>N<sub>2</sub>OS [M+H]<sup>+</sup>: 481.08, found 480.85

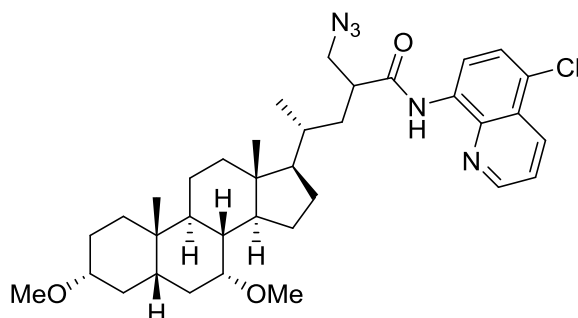

**(4R)-2-(azidomethyl)-N-(4-chloronaphthalen-1-yl)-4-((3R,5S,7R,8R,9S,10S,13R,14S,17R)-3,7-dimethoxy-10,13-dimethylhexadecahydro-1H-cyclopenta[a]phenanthren-17-yl)pentanamide ( 6j )**

Following the general procedure, substrate (40 mg, 0.67 mmol), NCS (18 mg, 0.14 mmol), Pd(OAc)<sub>2</sub> (1.5 mg, 0.07 mmol) and 2 ml AcOH were used. The reaction mixture was stirred at rt for 48 h. After completion of the reaction, NaN<sub>3</sub> (33mg, 0.5mmol), Cu(OAc)<sub>2</sub> (36mg, 0.2mmol) and 1mL DMF was added to the residue, the reaction mixture was stirred at 80°C for half an hour. After workup, the residue was purified by silica gel column chromatography (petroleum ether: ethyl acetate=15: 1). Finally, compound ( 6j ) (28 mg, colorless oil) was isolated in 65% yield.

<sup>1</sup>H-NMR (400 MHz, CDCl<sub>3</sub>) δ (ppm) 9.92 (s, 1H), 8.88 (s, 1H), 8.3 (d, *J* = 8.4 Hz, 1H), 8.57 (d, *J* = 8.8 Hz, 1H), 7.61-7.59 (m, 2H), 3.74-3.69 (m, 1H), 3.46-3.41 (m, 1H), 3.33, (s, 3HHHHHhijhuip-), 3.23 (s, 3H), 3.14 (s, 1H), 2.99 (m 1H), 2.83 (s, 1H), 2.14-0.86 (m, 30H), 0.55 (s, 3H); <sup>13</sup>C-NMR (100 MHz, CDCl<sub>3</sub>) δ (ppm) 172.0, 149.0, 139.2, 133.6, 133.5, 127.3, 126.1, 124.7, 122.6, 116.9, 80.8, 56.5, 56.0, 55.5, 54.7, 50.3, 46.4, 42.6, 42.0, 39.7, 36.9, 35.43, 35.35, 34.8, 34.4, 33.8, 29.8, 28.4, 28.0, 26.9, 23.8, 23.1, 20.9, 18.9, 14.3, 11.9; HRMS (ESI) calcd for C<sub>37</sub>H<sub>51</sub>ClN<sub>4</sub>O<sub>3</sub> [M+H]<sup>+</sup>: 636.36804, found 636.36680

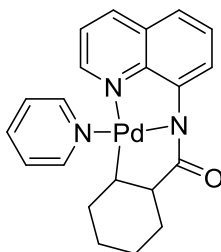

<sup>1</sup>H-NMR (400 MHz, CDCl<sub>3</sub>) δ (ppm) 9.14-9.10 (m, 1.42H), 8.95-8.94 (m, 2.93H), 8.14-8.12 (m, 1.45H), 7.92-7.88 (m, 1.41H), 7.77-7.67 (m, 1.55H), 7.53-7.45 (m, 4.31H), 7.23-7.17 (m, 2.94H), 2.94-2.82 (m, 1.43H), 2.63-2.51 (m, 1.46H), 2.14-2.11 (m, 1H), 1.96 (br, 0.49H), 1.76-1.09 (m, 11.35H); <sup>13</sup>C-NMR (100 MHz, CDCl<sub>3</sub>) δ (ppm) 185.76, 184.46, 152.60, 152.35, 147.21, 145.10, 144.91, 144.87, 137.84, 137.79, 137.44, 130.01, 129.94, 129.33, 125.72, 125.64, 120.51, 120.21, 120.17, 117.70, 117.66, 60.15, 56.01, 34.80, 34.66, 32.84, 32.77, 31.50, 28.96, 27.56, 27.19, 25.31; LRMS (ESI) calcd for C<sub>21</sub>H<sub>22</sub>N<sub>3</sub>OPd [M+H]<sup>+</sup>: 438.07, found 437.90

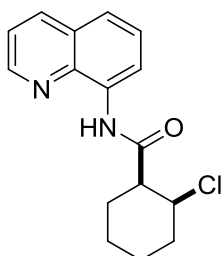

**(1S,2S)-2-chloro-N-(quinolin-8-yl)cyclohexane-1-carboxamide**

<sup>1</sup>H-NMR (400 MHz, CDCl<sub>3</sub>) δ (ppm) 10.14 (s, 1H), 8.83-8.81 (m, 2H), 8.16-8.14 (m, 1H), 7.56-7.43 (m, 3H), 4.96 (d, J = 1.4 Hz, 1H), 2.87-2.84 (m, 1H), 2.24-2.20 (m, 2H), 2.10-1.85 (m, 4H), 1.65-1.63 (m, 1H), 1.43-1.40 (m, 1H); <sup>13</sup>C-NMR (100 MHz, CDCl<sub>3</sub>) δ (ppm) 170.7, 148.4, 138.8, 136.4, 134.3, 128.1, 127.5, 121.8, 121.7, 116.8, 60.8, 50.9, 34.3, 24.9, 22.8, 19.9; LRMS (ESI) calcd for C<sub>16</sub>H<sub>17</sub>ClN<sub>2</sub>O [M+H]<sup>+</sup>: 289.10, found 289.07

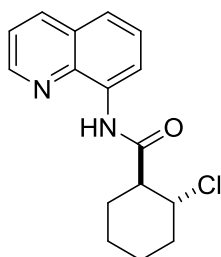

**(1S,2R)-2-chloro-N-(quinolin-8-yl)cyclohexane-1-carboxamide**

<sup>1</sup>H-NMR (400 MHz, CDCl<sub>3</sub>) δ (ppm) 9.91 (s, 1H), 8.84-8.81 (m, 2H), 8.17-8.15 (m, 1H), 7.56-7.44 (m, 3H), 4.28 (td, J = 10.7 Hz, J = 4.2 Hz, 1H), 2.70 (td, J = 11.8 Hz, J = 3.8 Hz, 1H), 2.39-2.34 (m, 1H), 2.15-2.12 (m, 1H), 2.19-1.72 (m, 4H), 1.47-1.40 (m, 2H); <sup>13</sup>C-NMR (100 MHz, CDCl<sub>3</sub>) δ (ppm) 171.9, 148.3, 138.6, 136.5, 134.4, 128.1, 127.6, 121.84, 121.76, 116.9, 60.3, 56.4, 36.6, 30.9, 26.0, 24.6; LRMS (ESI) calcd for C<sub>16</sub>H<sub>17</sub>ClN<sub>2</sub>O [M+H]<sup>+</sup>: 289.10, found 289.07

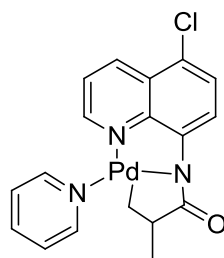

$^1\text{H-NMR}$  (400 MHz,  $\text{CDCl}_3$ )  $\delta$  (ppm) 9.10 (d,  $J = 8.6$  Hz, 1H), 8.82-8.81 (m, 2H), 8.56 (d,  $J = 8.6$  Hz, 1H), 7.93-7.88 (m, 2H), 7.56-7.47 (m, 3H), 7.38-7.35 (m, 1H), 2.91-2.85 (m, 1H), 1.90 (t,  $J = 8.2$  Hz, 1H), 1.57 (t,  $J = 8.7$  Hz, 1H), 1.27-1.25 (m, 3H);  $^{13}\text{C-NMR}$  (100 MHz,  $\text{CDCl}_3$ )  $\delta$  (ppm) 187.90, 152.34, 146.47, 145.92, 145.39, 137.63, 134.89, 129.15, 127.51, 125.82, 121.26, 120.32, 120.21, 47.34, 21.34, 19.21; LRMS (ESI) calcd for  $\text{C}_{18}\text{H}_{17}\text{ClN}_3\text{OPd}$   $[\text{M}+\text{H}]^+$ :434.00, found 433.91

**Cartesian coordinates (in Å) of related structures which calculated at the B3LYP/Lanl2dz + 6-31G(d) level of theory.**

#### Pd3(OAc)6

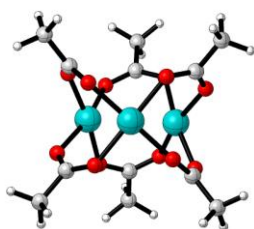

|    |             |             |             |
|----|-------------|-------------|-------------|
| Pd | 1.61508100  | 0.92607500  | -0.01063700 |
| C  | -0.06180400 | 2.60426100  | -1.87704500 |
| O  | 1.04306300  | 2.41870300  | -1.28785500 |
| O  | -1.17047300 | 2.03750200  | -1.63766000 |
| C  | -2.27679100 | -1.26108000 | 1.89219700  |
| O  | -1.54781200 | -2.11771700 | 1.31084200  |
| O  | -2.35771900 | -0.01908700 | 1.65045800  |
| C  | -3.18399200 | -1.78937100 | 2.98645000  |
| H  | -3.45042500 | -0.98878100 | 3.67891400  |
| H  | -4.10289000 | -2.16823500 | 2.52377000  |
| H  | -2.70064700 | -2.61478800 | 3.51312400  |
| C  | -0.06696100 | 3.64838100  | -2.97668900 |
| H  | 0.89297200  | 3.65373300  | -3.49714400 |
| H  | -0.88619600 | 3.46227800  | -3.67360100 |
| H  | -0.21637400 | 4.63426600  | -2.52102100 |
| Pd | -0.00137800 | -1.86134600 | -0.00019000 |
| C  | -2.26830100 | -1.34837800 | -1.84767700 |
| O  | -2.65299300 | -0.30004400 | -1.24903300 |
| O  | -1.22867100 | -2.03454400 | -1.61581500 |
| C  | 0.06542900  | 2.60373200  | 1.87744000  |



|    |             |             |             |
|----|-------------|-------------|-------------|
| O  | 1.17302800  | 2.03486200  | 1.63814400  |
| O  | -1.03965000 | 2.42052700  | 1.28788700  |
| C  | 0.07253800  | 3.64762800  | 2.97728000  |
| H  | -0.88894700 | 3.65807400  | 3.49473400  |
| H  | 0.88862700  | 3.45702500  | 3.67668800  |
| H  | 0.22896100  | 4.63274300  | 2.52228300  |
| C  | -3.15645100 | -1.82484800 | -2.98071100 |
| H  | -3.11492800 | -1.09396100 | -3.79533600 |
| H  | -2.83124200 | -2.80057800 | -3.34375000 |
| H  | -4.19318200 | -1.87436200 | -2.63540100 |
| Pd | -1.61369500 | 0.92869800  | 0.01071500  |
| C  | 2.26616900  | -1.35186200 | 1.84764700  |
| O  | 2.65264100  | -0.30415100 | 1.24904200  |
| O  | 1.22555600  | -2.03644500 | 1.61553300  |
| C  | 3.15312800  | -1.82951600 | 2.98111100  |
| H  | 3.10978700  | -1.09997000 | 3.79686100  |
| H  | 2.82802700  | -2.80599900 | 3.34223200  |
| H  | 4.19039200  | -1.87769400 | 2.63727400  |
| C  | 2.27526300  | -1.26390900 | -1.89247000 |
| O  | 2.35840500  | -0.02211100 | -1.65036800 |
| O  | 1.54464200  | -2.11937000 | -1.31148500 |
| C  | 3.18165900  | -1.79352200 | -2.98674800 |
| H  | 4.09934900  | -2.17515200 | -2.52394700 |
| H  | 2.69647400  | -2.61728200 | -3.51433700 |
| H  | 3.45043300  | -0.99303600 | -3.67842000 |

#### AcOH

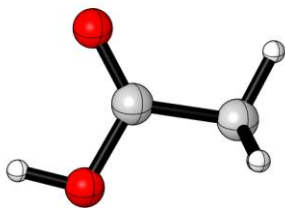

|   |             |             |             |
|---|-------------|-------------|-------------|
| C | 1.39644000  | -0.09796500 | 0.00001100  |
| H | 1.68937000  | -0.67787800 | -0.88150700 |
| H | 1.68950700  | -0.67615000 | 0.88262900  |
| H | 1.90754200  | 0.86497800  | -0.00092100 |
| C | -0.09571100 | 0.12412500  | -0.00001900 |
| O | -0.77154800 | -1.05403300 | 0.00025200  |
| H | -1.71869300 | -0.81848700 | 0.00032100  |
| O | -0.65840000 | 1.19566900  | -0.00012800 |

#### 5-Cl\_sub

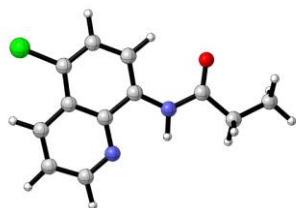

|    |             |             |             |
|----|-------------|-------------|-------------|
| C  | -4.39425400 | -0.63601800 | -1.16700100 |
| C  | -2.73490200 | 0.41062400  | 0.04407900  |
| C  | -3.32803100 | 1.69896900  | -0.14686100 |
| C  | -4.52612400 | 1.74818500  | -0.90350100 |
| C  | -5.05973900 | 0.58647100  | -1.41301000 |
| H  | -4.79810600 | -1.56769800 | -1.56030700 |
| C  | -1.52017500 | 0.27701300  | 0.80130300  |
| C  | -2.68065300 | 2.82589200  | 0.43039300  |
| H  | -5.00845400 | 2.70506200  | -1.07159500 |
| H  | -5.97574100 | 0.59776400  | -1.99530500 |
| C  | -1.51841100 | 2.67744600  | 1.15074600  |
| C  | -0.93057900 | 1.40758000  | 1.34163400  |
| H  | -1.04030900 | 3.55038900  | 1.58241700  |
| H  | -0.01707400 | 1.30981600  | 1.91086500  |
| N  | -3.27908500 | -0.72640100 | -0.46892300 |
| N  | -1.03262700 | -1.02418600 | 0.92445500  |
| H  | -1.62158100 | -1.70401700 | 0.45117200  |
| C  | 0.08334600  | -1.46299200 | 1.60515700  |
| O  | 0.85030700  | -0.71834900 | 2.20055500  |
| C  | 0.26488200  | -2.98120400 | 1.56641600  |
| H  | -0.51247800 | -3.42697600 | 2.20409700  |
| H  | 0.06671300  | -3.34582900 | 0.54949800  |
| C  | 1.65131000  | -3.41482400 | 2.04043400  |
| H  | 1.84994600  | -3.03786700 | 3.04700300  |
| H  | 1.72769200  | -4.50705100 | 2.05173900  |
| H  | 2.43257000  | -3.02119300 | 1.38263600  |
| Cl | -3.36815700 | 4.43460200  | 0.22568100  |

### 5-Cl\_int

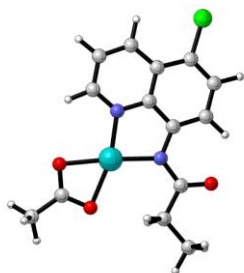

|   |             |            |            |
|---|-------------|------------|------------|
| C | -4.46259300 | 3.75733500 | 0.57581000 |
|---|-------------|------------|------------|

|    |             |             |             |
|----|-------------|-------------|-------------|
| C  | -3.19493700 | 4.17030500  | 0.92589500  |
| C  | -2.10924300 | 3.26120000  | 0.85338000  |
| C  | -2.40067200 | 1.93501100  | 0.40890800  |
| C  | -3.70889400 | 1.49341800  | 0.04253100  |
| C  | -4.73107000 | 2.44421700  | 0.13977000  |
| H  | -0.51325100 | 4.55500800  | 1.52484600  |
| H  | -5.28503500 | 4.46282700  | 0.63625200  |
| C  | -0.76370200 | 3.55625800  | 1.18391200  |
| H  | -5.73784000 | 2.16323100  | -0.12436900 |
| C  | -0.14350200 | 1.30083000  | 0.62895200  |
| C  | 0.21126800  | 2.58714200  | 1.07372400  |
| H  | 0.57883600  | 0.49823800  | 0.52204800  |
| H  | 1.24547300  | 2.79738800  | 1.32325200  |
| N  | -1.39944200 | 1.00929800  | 0.31565700  |
| C  | -4.99841200 | -0.40863100 | -0.75595500 |
| O  | -6.06028100 | 0.21155200  | -0.76627700 |
| C  | -4.95068700 | -1.87135900 | -1.17932300 |
| H  | -4.22674900 | -1.98461000 | -1.99468800 |
| H  | -4.54496600 | -2.46849000 | -0.35398500 |
| N  | -3.79301200 | 0.16173200  | -0.36677000 |
| Pd | -1.98923600 | -0.79077100 | -0.32362200 |
| C  | -0.83778700 | -2.93914500 | -0.75201200 |
| C  | -0.10558100 | -4.21900900 | -1.03173800 |
| H  | 0.18014600  | -4.24534800 | -2.09009500 |
| H  | 0.80207500  | -4.27652500 | -0.42671400 |
| H  | -0.75560300 | -5.07481500 | -0.83415000 |
| O  | -2.09215700 | -2.83620000 | -0.94594300 |
| O  | -0.21295000 | -1.90283900 | -0.33021500 |
| Cl | -2.92655700 | 5.82295500  | 1.46149700  |
| C  | -6.32280100 | -2.39825300 | -1.60073300 |
| H  | -7.04524600 | -2.31772600 | -0.78321300 |
| H  | -6.72263900 | -1.82842600 | -2.44473500 |
| H  | -6.24707800 | -3.45048500 | -1.89616400 |

**5-Cl**

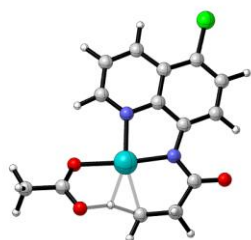

|   |             |            |            |
|---|-------------|------------|------------|
| C | -4.53671400 | 3.77240700 | 0.65391600 |
| C | -3.28016100 | 4.23393700 | 0.98558200 |

|    |             |             |             |
|----|-------------|-------------|-------------|
| C  | -2.15209100 | 3.37613100  | 0.89455900  |
| C  | -2.38275500 | 2.03837000  | 0.45274800  |
| C  | -3.68599500 | 1.55646200  | 0.10914000  |
| C  | -4.75218200 | 2.44927600  | 0.21858700  |
| H  | -0.60799100 | 4.74477200  | 1.54474800  |
| H  | -5.38542900 | 4.44427400  | 0.73032400  |
| C  | -0.81655000 | 3.73603600  | 1.20481800  |
| H  | -5.74592300 | 2.11315000  | -0.04020400 |
| C  | -0.10090700 | 1.51184000  | 0.62982700  |
| C  | 0.19971000  | 2.81409600  | 1.07448700  |
| H  | 0.65887500  | 0.74697800  | 0.50759600  |
| H  | 1.22672400  | 3.07385400  | 1.30766600  |
| N  | -1.34147600 | 1.15209800  | 0.33557100  |
| C  | -4.84908700 | -0.41513000 | -0.78661700 |
| O  | -5.97136400 | 0.07851200  | -0.85012500 |
| C  | -4.54220200 | -1.82534100 | -1.28047600 |
| H  | -5.43344900 | -2.43769700 | -1.09972500 |
| H  | -4.43290000 | -1.76143400 | -2.37218900 |
| C  | -3.29112700 | -2.46953900 | -0.66685200 |
| H  | -3.39921400 | -2.63028200 | 0.41283700  |
| N  | -3.73028000 | 0.23316900  | -0.30849300 |
| Pd | -1.98001900 | -0.70780100 | -0.28065500 |
| C  | 0.09019000  | -2.49536000 | -1.08666800 |
| C  | 1.47177500  | -3.07339800 | -1.28251700 |
| H  | 2.21550000  | -2.51218200 | -0.71540900 |
| H  | 1.47314100  | -4.12003900 | -0.96088800 |
| H  | 1.72325800  | -3.06016700 | -2.34757300 |
| O  | -0.87511100 | -3.01472400 | -1.72767000 |
| O  | -0.05341200 | -1.51957800 | -0.28451400 |
| H  | -1.99184300 | -2.48689000 | -1.25187200 |
| H  | -3.19599700 | -3.48536000 | -1.07685200 |
| Cl | -3.07771800 | 5.89570900  | 1.52516600  |

**5-Cl\_7-Cl\_sub**

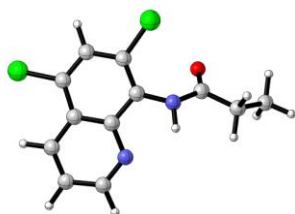

|   |             |             |             |
|---|-------------|-------------|-------------|
| C | -3.89076800 | -0.94431700 | -0.65232500 |
| C | -2.26317500 | 0.54432100  | 0.01485500  |
| C | -3.21162700 | 1.60831100  | 0.12991000  |

|    |             |             |             |
|----|-------------|-------------|-------------|
| C  | -4.55903000 | 1.31546500  | -0.19422200 |
| C  | -4.90126500 | 0.04162100  | -0.58723200 |
| H  | -4.13993300 | -1.96178900 | -0.94991700 |
| C  | -0.87424300 | 0.75148900  | 0.32327300  |
| C  | -2.73397700 | 2.87724400  | 0.56012000  |
| H  | -5.30556700 | 2.09913000  | -0.12331200 |
| H  | -5.92565000 | -0.21264000 | -0.83997700 |
| C  | -1.41651200 | 3.06185000  | 0.89752700  |
| C  | -0.49206700 | 1.99285000  | 0.80731900  |
| H  | -1.07092300 | 4.02447400  | 1.25443800  |
| N  | -2.62392900 | -0.71086200 | -0.36909700 |
| N  | -0.02180800 | -0.34950900 | 0.17447900  |
| H  | -0.54221800 | -1.22221100 | 0.16022800  |
| C  | 1.14545000  | -0.34372800 | -0.59681500 |
| O  | 1.61392000  | 0.66430200  | -1.08951500 |
| C  | 1.79272100  | -1.72198500 | -0.71638900 |
| H  | 2.23522000  | -1.96168900 | 0.26084300  |
| H  | 1.01618100  | -2.48055100 | -0.88716800 |
| C  | 2.85583200  | -1.77318700 | -1.81266800 |
| H  | 3.61989500  | -1.01002000 | -1.64343400 |
| H  | 3.33812000  | -2.75603300 | -1.83360200 |
| H  | 2.41583900  | -1.58441100 | -2.79710600 |
| Cl | 1.11293000  | 2.29310500  | 1.41654700  |
| Cl | -3.84110000 | 4.23532300  | 0.69354400  |

#### 5-Cl\_7-Cl\_int

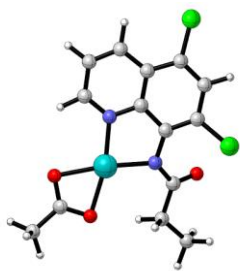

|   |             |            |             |
|---|-------------|------------|-------------|
| C | -4.53528900 | 3.56010300 | 0.39266200  |
| C | -3.43354900 | 4.16500800 | 0.95248000  |
| C | -2.18522000 | 3.48959900 | 0.98864400  |
| C | -2.16476100 | 2.15990200 | 0.47597700  |
| C | -3.31324300 | 1.47337300 | -0.01883400 |
| C | -4.47811100 | 2.24226300 | -0.11828700 |
| H | -0.95349400 | 5.03125800 | 1.87101600  |
| H | -5.47184400 | 4.10080400 | 0.32323500  |
| C | -0.96572200 | 4.02489400 | 1.46665800  |
| C | 0.14887500  | 1.98492400 | 0.84945800  |
| C | 0.19209400  | 3.27663700 | 1.40496600  |

|    |             |             |             |
|----|-------------|-------------|-------------|
| H  | 1.03489000  | 1.36707100  | 0.74494600  |
| H  | 1.13710000  | 3.67115800  | 1.76148900  |
| N  | -0.98823400 | 1.46209900  | 0.40948700  |
| C  | -4.04766300 | -0.82102300 | -0.03881000 |
| O  | -4.98632700 | -0.57016700 | 0.70419400  |
| C  | -3.82274300 | -2.21245500 | -0.61706600 |
| H  | -3.53363500 | -2.11899400 | -1.66935100 |
| H  | -2.95523500 | -2.66315300 | -0.11753600 |
| N  | -3.11507800 | 0.15499400  | -0.41916100 |
| Pd | -1.13697000 | -0.29902000 | -0.55620000 |
| C  | 0.40888400  | -1.99006800 | -1.46518100 |
| C  | 1.35474300  | -2.99286900 | -2.05740500 |
| H  | 2.28554300  | -3.01833200 | -1.48606700 |
| H  | 0.88950100  | -3.98110400 | -2.08191400 |
| H  | 1.58920000  | -2.69902500 | -3.08752500 |
| O  | -0.85425800 | -2.11399500 | -1.59969200 |
| O  | 0.84211500  | -0.96613300 | -0.83057300 |
| C  | -5.04981200 | -3.11081400 | -0.45235100 |
| H  | -5.32998000 | -3.20259500 | 0.60053400  |
| H  | -5.91338100 | -2.69993900 | -0.98527400 |
| H  | -4.84372600 | -4.11078600 | -0.84936500 |
| Cl | -5.89168200 | 1.68072300  | -0.96144500 |
| Cl | -3.56832600 | 5.79868400  | 1.57680500  |

### 5-Cl\_7-Cl

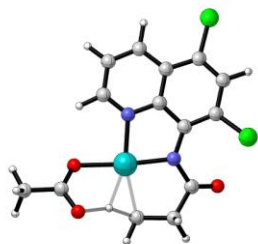

|   |             |            |             |
|---|-------------|------------|-------------|
| C | -4.47557000 | 3.87740700 | 0.34761200  |
| C | -3.27169000 | 4.26148800 | 0.88907700  |
| C | -2.17657000 | 3.35770200 | 0.91717600  |
| C | -2.41623900 | 2.03662300 | 0.43688400  |
| C | -3.69465700 | 1.58236000 | -0.03404700 |
| C | -4.68152200 | 2.57013800 | -0.15085100 |
| H | -0.66259600 | 4.66400200 | 1.73735400  |
| H | -5.28852000 | 4.59027500 | 0.27523400  |
| C | -0.86805300 | 3.66853100 | 1.35883700  |
| C | -0.16788100 | 1.44418400 | 0.77889600  |
| C | 0.13008800  | 2.71958500 | 1.29336400  |
| H | 0.57983000  | 0.66367300 | 0.68396300  |

|    |             |             |             |
|----|-------------|-------------|-------------|
| H  | 1.13993800  | 2.94151000  | 1.62075000  |
| N  | -1.38986600 | 1.12784700  | 0.37412800  |
| C  | -4.85814700 | -0.57872400 | -0.30550800 |
| O  | -5.88757900 | -0.29054800 | 0.28104700  |
| C  | -4.61494100 | -1.91268100 | -1.00175600 |
| H  | -5.41066300 | -2.60069600 | -0.69823000 |
| H  | -4.72799100 | -1.74025700 | -2.08078400 |
| C  | -3.23198400 | -2.52093900 | -0.71910600 |
| H  | -3.13417500 | -2.83479500 | 0.32740200  |
| N  | -3.74799400 | 0.25694600  | -0.42922900 |
| Pd | -1.99309900 | -0.69542100 | -0.36233400 |
| C  | 0.09577600  | -2.42865800 | -1.20526100 |
| C  | 1.48242900  | -2.99310800 | -1.40504200 |
| H  | 2.20414500  | -2.50128800 | -0.75166300 |
| H  | 1.46750400  | -4.06843000 | -1.20017700 |
| H  | 1.77743500  | -2.86547400 | -2.45138000 |
| O  | -0.85035300 | -2.88983000 | -1.91480400 |
| O  | -0.07037000 | -1.51870900 | -0.33139100 |
| H  | -1.98762000 | -2.40548300 | -1.40859200 |
| H  | -3.15772100 | -3.45342300 | -1.29644700 |
| Cl | -6.16909100 | 2.31104100  | -1.01652900 |
| Cl | -3.08257100 | 5.89736200  | 1.49599800  |

### 5-OMe\_7-Cl\_sub

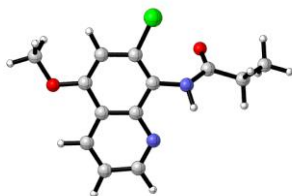

|   |             |             |             |
|---|-------------|-------------|-------------|
| C | -3.90355500 | -0.98889700 | -0.73920400 |
| C | -2.28835400 | 0.41887600  | 0.10681800  |
| C | -3.24390200 | 1.45327400  | 0.32835800  |
| C | -4.58573500 | 1.20198800  | -0.03804200 |
| C | -4.92028100 | -0.02205800 | -0.57609000 |
| H | -4.14573700 | -1.96786600 | -1.15122200 |
| C | -0.90807000 | 0.60490400  | 0.45953500  |
| C | -2.80838600 | 2.68667200  | 0.90681800  |
| H | -5.32992100 | 1.97581700  | 0.11565800  |
| H | -5.94051700 | -0.25143200 | -0.86719400 |
| C | -1.49170800 | 2.83832200  | 1.28268000  |
| C | -0.55841500 | 1.78831900  | 1.08266000  |
| H | -1.13718700 | 3.74661500  | 1.75151300  |

|    |             |             |             |
|----|-------------|-------------|-------------|
| N  | -2.63834000 | -0.78777000 | -0.41892000 |
| N  | -0.02995200 | -0.46263700 | 0.20347700  |
| H  | -0.52788200 | -1.34417400 | 0.12185600  |
| C  | 1.11459700  | -0.35680400 | -0.58693100 |
| O  | 1.56450600  | 0.70489900  | -0.97663500 |
| C  | 1.77401400  | -1.70590800 | -0.87437800 |
| H  | 2.14140900  | -2.10882700 | 0.07970700  |
| H  | 1.01024100  | -2.41467100 | -1.22473400 |
| C  | 2.91345800  | -1.59334200 | -1.88569900 |
| H  | 3.67073800  | -0.88639800 | -1.53637100 |
| H  | 3.38741000  | -2.56849800 | -2.04051700 |
| H  | 2.54768500  | -1.22945200 | -2.85084500 |
| Cl | 1.04304400  | 2.03947200  | 1.73262500  |
| O  | -3.77586400 | 3.63247900  | 1.05808200  |
| C  | -3.41089200 | 4.87863900  | 1.63447700  |
| H  | -2.64624100 | 5.38648600  | 1.03310900  |
| H  | -4.32158900 | 5.47946800  | 1.64915200  |
| H  | -3.04082100 | 4.75028300  | 2.65974600  |

#### 5-OMe\_7-Cl\_int

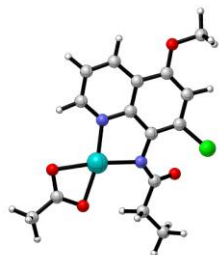

|   |             |             |             |
|---|-------------|-------------|-------------|
| C | -4.52731300 | 3.59370000  | 0.13778800  |
| C | -3.44377800 | 4.21086200  | 0.72796700  |
| C | -2.20895500 | 3.50104800  | 0.82544500  |
| C | -2.18168500 | 2.15911500  | 0.35708500  |
| C | -3.31401200 | 1.47393900  | -0.16346400 |
| C | -4.45661100 | 2.25508800  | -0.32897500 |
| H | -1.01855500 | 5.07131200  | 1.70215200  |
| H | -5.46346200 | 4.11942600  | 0.00195700  |
| C | -1.01278600 | 4.05147300  | 1.33309300  |
| C | 0.11428700  | 1.98855800  | 0.82545900  |
| C | 0.14488500  | 3.29589100  | 1.34230300  |
| H | 1.00127300  | 1.36515200  | 0.77353400  |
| H | 1.07841100  | 3.69616600  | 1.72204100  |
| N | -1.00668600 | 1.45389300  | 0.35594000  |
| C | -4.04525700 | -0.81771200 | -0.09087700 |
| O | -5.01251000 | -0.52558700 | 0.60180400  |
| C | -3.79380200 | -2.24818600 | -0.55678900 |



|    |             |             |             |
|----|-------------|-------------|-------------|
| H  | -3.44877600 | -2.23259800 | -1.59563500 |
| H  | -2.95666400 | -2.66118200 | 0.02191000  |
| N  | -3.11495300 | 0.13308500  | -0.51886100 |
| Pd | -1.13530200 | -0.32454900 | -0.58456400 |
| C  | 0.42541100  | -2.03733800 | -1.43312500 |
| C  | 1.37803300  | -3.05472700 | -1.99130800 |
| H  | 2.29546800  | -3.07926000 | -1.39867100 |
| H  | 0.90667600  | -4.04015500 | -2.01379300 |
| H  | 1.63784200  | -2.77611100 | -3.01957000 |
| O  | -0.83422900 | -2.15502400 | -1.59974000 |
| O  | 0.85247500  | -1.01140000 | -0.79904500 |
| C  | -5.03068100 | -3.13344500 | -0.39308400 |
| H  | -5.36964100 | -3.14415900 | 0.64635400  |
| H  | -5.86183800 | -2.76483600 | -1.00319600 |
| H  | -4.80682500 | -4.16083400 | -0.70101700 |
| Cl | -5.84791900 | 1.67504800  | -1.20110600 |
| O  | -3.42530100 | 5.48360300  | 1.21107000  |
| C  | -4.62007700 | 6.24905500  | 1.12547300  |
| H  | -5.43911800 | 5.77005900  | 1.67660700  |
| H  | -4.38967900 | 7.21381200  | 1.57989600  |
| H  | -4.92256700 | 6.39937500  | 0.08129200  |

#### 5-OMe\_7-Cl

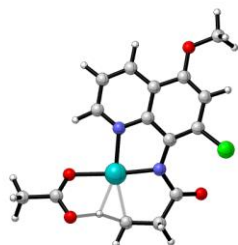

|   |             |            |             |
|---|-------------|------------|-------------|
| C | -4.58173700 | 3.78692600 | 0.46533900  |
| C | -3.38705600 | 4.18592100 | 1.02477800  |
| C | -2.28298900 | 3.28089700 | 1.02031500  |
| C | -2.49328300 | 1.97190500 | 0.50548700  |
| C | -3.75767800 | 1.50889100 | 0.01775900  |
| C | -4.75361800 | 2.48362300 | -0.06988700 |
| H | -0.81941300 | 4.61224300 | 1.87652700  |
| H | -5.42151700 | 4.46603700 | 0.39579500  |
| C | -0.98955500 | 3.61976500 | 1.47371900  |
| C | -0.23075100 | 1.43105700 | 0.83739300  |
| C | 0.03538100  | 2.69800900 | 1.38712400  |
| H | 0.53751800  | 0.67320700 | 0.72284400  |
| H | 1.03917900  | 2.93538200 | 1.72238300  |
| N | -1.44324500 | 1.09148300 | 0.41927100  |

|    |             |             |             |
|----|-------------|-------------|-------------|
| C  | -4.86704700 | -0.67268300 | -0.29699700 |
| O  | -5.90240300 | -0.41764100 | 0.29819500  |
| C  | -4.60188600 | -1.99191900 | -1.01540400 |
| H  | -5.37319300 | -2.70519800 | -0.70650000 |
| H  | -4.74147800 | -1.80832100 | -2.08944500 |
| C  | -3.19844000 | -2.56845600 | -0.76988600 |
| H  | -3.07885400 | -2.91224400 | 0.26505200  |
| N  | -3.78356600 | 0.18907200  | -0.42731800 |
| Pd | -2.00618700 | -0.72140400 | -0.37325100 |
| C  | 0.12431700  | -2.38601900 | -1.25639500 |
| C  | 1.52168300  | -2.91818100 | -1.47238600 |
| H  | 2.23438200  | -2.42931400 | -0.80689400 |
| H  | 1.52842300  | -3.99856800 | -1.29535500 |
| H  | 1.81309500  | -2.75775400 | -2.51523700 |
| O  | -0.81203200 | -2.84703400 | -1.98067600 |
| O  | -0.06000100 | -1.50574200 | -0.35808400 |
| H  | -1.95512400 | -2.40195700 | -1.46517600 |
| H  | -3.10485600 | -3.47938600 | -1.37808800 |
| Cl | -6.23929300 | 2.21877300  | -0.94217900 |
| O  | -3.13676800 | 5.41187500  | 1.56429600  |
| C  | -4.19153500 | 6.36389200  | 1.57601500  |
| H  | -3.78602500 | 7.25347600  | 2.06048100  |
| H  | -4.51214100 | 6.61639900  | 0.55714400  |
| H  | -5.05310000 | 5.99583500  | 2.14746000  |

5-Cl\_7-OMe\_sub

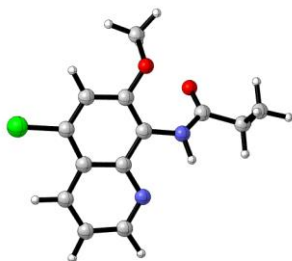

|   |             |             |             |
|---|-------------|-------------|-------------|
| C | -1.33712000 | 3.21664200  | -0.10190900 |
| C | -0.68138500 | 1.00903900  | -0.20513700 |
| C | -2.01773300 | 0.55029000  | 0.03028000  |
| C | -3.01964400 | 1.53369000  | 0.21390800  |
| C | -2.68349100 | 2.86711300  | 0.14976600  |
| H | -1.05014400 | 4.26546900  | -0.16625000 |
| C | 0.39159000  | 0.08010300  | -0.38836400 |
| C | -2.23355500 | -0.85430800 | 0.05933200  |
| H | -4.04238800 | 1.22273800  | 0.39861500  |
| H | -3.43060500 | 3.64283900  | 0.28415700  |

|    |             |             |             |
|----|-------------|-------------|-------------|
| C  | -1.20869200 | -1.73839600 | -0.17068500 |
| C  | 0.11039300  | -1.28123000 | -0.42826700 |
| H  | -1.41225100 | -2.80229900 | -0.19593800 |
| N  | -0.37115500 | 2.33478500  | -0.26985700 |
| N  | 1.67308400  | 0.61368000  | -0.58962200 |
| H  | 1.64089800  | 1.59053200  | -0.86433800 |
| C  | 2.82420800  | 0.19697300  | 0.06256600  |
| O  | 2.87008300  | -0.76473000 | 0.81247200  |
| C  | 4.05522700  | 1.03521300  | -0.28282000 |
| H  | 4.41096400  | 0.69730800  | -1.26664100 |
| H  | 3.76947900  | 2.08777400  | -0.41219600 |
| C  | 5.16606700  | 0.89487800  | 0.75771600  |
| H  | 5.42825400  | -0.15703900 | 0.89665300  |
| H  | 6.06021500  | 1.44339600  | 0.44335500  |
| H  | 4.84780200  | 1.28612700  | 1.72972200  |
| Cl | -3.84894200 | -1.48815600 | 0.36044400  |
| O  | 1.08371400  | -2.14938900 | -0.81236800 |
| C  | 1.33501700  | -3.27722000 | 0.03019300  |
| H  | 2.16969300  | -3.80864600 | -0.43012100 |
| H  | 1.62097300  | -2.94204600 | 1.03043800  |
| H  | 0.46995600  | -3.95053600 | 0.08103900  |

**5-Cl\_7-OMe\_int**

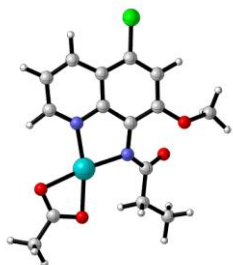

|   |             |             |             |
|---|-------------|-------------|-------------|
| C | 3.39869400  | 0.80592100  | -0.43441600 |
| C | 3.60966100  | -0.51352900 | -0.10137700 |
| C | 2.51462400  | -1.38149500 | 0.14281300  |
| C | 1.21545500  | -0.79146600 | 0.07826700  |
| C | 0.98062900  | 0.58432200  | -0.16511800 |
| C | 2.09604400  | 1.36181900  | -0.51248500 |
| H | 3.56362700  | -3.23938800 | 0.48580400  |
| H | 4.24929600  | 1.43150000  | -0.67833000 |
| C | 2.59006000  | -2.76462900 | 0.42527900  |
| C | 0.18678200  | -2.86161100 | 0.50469900  |
| C | 1.43626100  | -3.50027700 | 0.61060400  |
| H | -0.75026900 | -3.39816700 | 0.61420300  |
| H | 1.47410400  | -4.56297100 | 0.82269800  |
| N | 0.09485900  | -1.56341200 | 0.24986200  |

|    |             |             |             |
|----|-------------|-------------|-------------|
| C  | -0.64949000 | 2.22434200  | 0.49467100  |
| O  | 0.20022400  | 2.91761800  | 1.04614200  |
| C  | -2.11071900 | 2.65578600  | 0.43330500  |
| H  | -2.49769900 | 2.46434900  | -0.57324400 |
| H  | -2.69675300 | 2.00570200  | 1.09598200  |
| N  | -0.34944900 | 1.00757900  | -0.11338300 |
| Pd | -1.62929700 | -0.56977800 | -0.07231200 |
| C  | -4.01165800 | -1.14637200 | -0.34922300 |
| C  | -5.45333500 | -1.50586500 | -0.56269000 |
| H  | -5.69948100 | -2.42116600 | -0.01952200 |
| H  | -6.09802200 | -0.68308100 | -0.24448700 |
| H  | -5.62470000 | -1.68057900 | -1.63157800 |
| O  | -3.61269400 | 0.06198100  | -0.44650500 |
| O  | -3.13834300 | -2.04485700 | -0.09012700 |
| C  | -2.30064000 | 4.12027000  | 0.83133100  |
| H  | -1.91675800 | 4.30620100  | 1.83819700  |
| H  | -1.76351400 | 4.78720700  | 0.14894500  |
| H  | -3.36321600 | 4.38601200  | 0.80625400  |
| Cl | 5.25273400  | -1.13340900 | -0.03013100 |
| O  | 1.89786400  | 2.60384100  | -1.01308200 |
| C  | 2.69093900  | 3.67539300  | -0.49749800 |
| H  | 2.58455300  | 3.73072100  | 0.58886200  |
| H  | 3.74674400  | 3.57523900  | -0.77993500 |
| H  | 2.28916100  | 4.58268500  | -0.95104100 |

**5-Cl\_7-OMe**

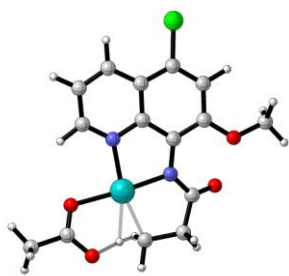

|   |             |            |             |
|---|-------------|------------|-------------|
| C | -4.34322600 | 3.99799700 | 0.30103000  |
| C | -3.13571000 | 4.34398800 | 0.86961700  |
| C | -2.06142600 | 3.42179900 | 0.91134400  |
| C | -2.32680800 | 2.11006400 | 0.40627700  |
| C | -3.59492000 | 1.70239700 | -0.08986700 |
| C | -4.57064300 | 2.70694100 | -0.23532000 |
| H | -0.53147100 | 4.67374900 | 1.78396300  |
| H | -5.12351800 | 4.74604600 | 0.23566800  |
| C | -0.75710100 | 3.68852000 | 1.38976300  |
| C | -0.10907800 | 1.44566200 | 0.81218600  |
| C | 0.21393000  | 2.71009900 | 1.34278000  |

|    |             |             |             |
|----|-------------|-------------|-------------|
| H  | 0.61812000  | 0.64366500  | 0.73683100  |
| H  | 1.22094800  | 2.89881000  | 1.69834600  |
| N  | -1.32530300 | 1.16710400  | 0.36877300  |
| C  | -4.84963700 | -0.39290200 | -0.44875600 |
| O  | -5.90390200 | -0.05743200 | 0.06960700  |
| C  | -4.63086100 | -1.73971500 | -1.13202900 |
| H  | -5.46757200 | -2.39367100 | -0.86464200 |
| H  | -4.68718800 | -1.56760000 | -2.21564300 |
| C  | -3.28841800 | -2.40403100 | -0.78665000 |
| H  | -3.25015800 | -2.71502100 | 0.26467500  |
| N  | -3.69585500 | 0.38025000  | -0.50435100 |
| Pd | -1.98299900 | -0.63353400 | -0.38589800 |
| C  | 0.06061100  | -2.45693500 | -1.15543000 |
| C  | 1.42589700  | -3.08536100 | -1.30859000 |
| H  | 2.15464600  | -2.60291900 | -0.65592100 |
| H  | 1.36121700  | -4.15149400 | -1.06746000 |
| H  | 1.74677700  | -3.00676600 | -2.35199700 |
| O  | -0.88260300 | -2.88333000 | -1.89197800 |
| O  | -0.09239100 | -1.53543900 | -0.29347400 |
| H  | -2.00871000 | -2.34832900 | -1.42820200 |
| H  | -3.22915700 | -3.34314900 | -1.35509600 |
| Cl | -2.92842600 | 5.96900800  | 1.50858700  |
| O  | -5.67238300 | 2.40490900  | -0.95214700 |
| C  | -6.85273700 | 3.17840000  | -0.78845900 |
| H  | -7.12608700 | 3.26245200  | 0.26991000  |
| H  | -6.74657200 | 4.18037500  | -1.22536500 |
| H  | -7.63439000 | 2.63546600  | -1.32100000 |

### 5- OMe\_sub

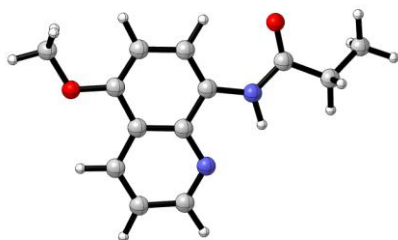

|   |             |             |             |
|---|-------------|-------------|-------------|
| C | -4.33957100 | -0.59536600 | -1.20399800 |
| C | -2.69809900 | 0.40812000  | 0.06555200  |
| C | -3.25506100 | 1.70399300  | -0.14798400 |
| C | -4.42176100 | 1.79016700  | -0.94390700 |
| C | -4.96742300 | 0.64122600  | -1.47418800 |
| H | -4.75255400 | -1.51702500 | -1.61230100 |
| C | -1.51482200 | 0.25845800  | 0.86494200  |
| C | -2.62308200 | 2.84336800  | 0.44036100  |

|   |             |             |             |
|---|-------------|-------------|-------------|
| H | -4.86729300 | 2.76263400  | -1.12316000 |
| H | -5.86167800 | 0.67278600  | -2.08891500 |
| C | -1.48691100 | 2.66956700  | 1.20375300  |
| C | -0.93224500 | 1.38341500  | 1.41668500  |
| H | -0.99042100 | 3.51842500  | 1.65949600  |
| H | -0.04054900 | 1.27258600  | 2.01778200  |
| N | -3.25127900 | -0.71686300 | -0.46686300 |
| N | -1.05087900 | -1.05570700 | 1.01121200  |
| H | -1.63531200 | -1.72661100 | 0.52168400  |
| C | 0.03051400  | -1.50630700 | 1.72655900  |
| O | 0.79578500  | -0.77192800 | 2.34222000  |
| C | 0.19100700  | -3.02791000 | 1.72176700  |
| H | -0.35953300 | -3.41321300 | 2.59213800  |
| H | -0.28893800 | -3.46277800 | 0.83585500  |
| C | 1.65886700  | -3.45098000 | 1.81196200  |
| H | 2.13590400  | -2.97353400 | 2.67160900  |
| H | 1.74324600  | -4.53766500 | 1.91740700  |
| H | 2.21175000  | -3.15068200 | 0.91516200  |
| O | -3.22748100 | 4.04048000  | 0.17927900  |
| C | -2.65000000 | 5.21168900  | 0.73273900  |
| H | -3.27872600 | 6.04126300  | 0.40420300  |
| H | -2.64022400 | 5.17382500  | 1.83001400  |
| H | -1.62546000 | 5.36403000  | 0.36853100  |

### 5- OMe\_int

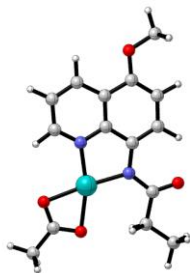

|   |             |            |             |
|---|-------------|------------|-------------|
| C | -4.56258300 | 3.68219100 | 0.42083600  |
| C | -3.34732000 | 4.18737800 | 0.84166400  |
| C | -2.21064200 | 3.32725600 | 0.83461100  |
| C | -2.38684900 | 1.98366500 | 0.39320500  |
| C | -3.63593400 | 1.45781000 | -0.04216200 |
| C | -4.71360800 | 2.34456000 | -0.01490900 |
| H | -0.76747000 | 4.74568200 | 1.57861200  |
| H | -5.44519800 | 4.31188900 | 0.41474700  |
| C | -0.91760900 | 3.72627000 | 1.24019800  |
| H | -5.68305000 | 1.99700000 | -0.33493000 |
| C | -0.10869000 | 1.51457500 | 0.75915700  |
| C | 0.13062400  | 2.82703700 | 1.20312400  |

|    |             |             |             |
|----|-------------|-------------|-------------|
| H  | 0.67304100  | 0.76339800  | 0.71003600  |
| H  | 1.13146400  | 3.11096900  | 1.50942700  |
| N  | -1.31963600 | 1.12822100  | 0.37537000  |
| C  | -4.74095100 | -0.53198400 | -0.90420100 |
| O  | -5.83946800 | 0.01950600  | -0.99139900 |
| C  | -4.57545400 | -1.99122300 | -1.31509900 |
| H  | -3.79072300 | -2.06277700 | -2.07723900 |
| H  | -4.19459700 | -2.56242200 | -0.46042600 |
| N  | -3.60833500 | 0.11192400  | -0.44138700 |
| Pd | -1.75663800 | -0.71928400 | -0.25285300 |
| C  | -0.46034700 | -2.81097500 | -0.52951900 |
| C  | 0.34336200  | -4.07021400 | -0.68404100 |
| H  | 1.39366300  | -3.88518200 | -0.45129200 |
| H  | -0.05338500 | -4.84047400 | -0.01394400 |
| H  | 0.24638400  | -4.44446700 | -1.70822600 |
| O  | -1.70213300 | -2.78572900 | -0.81238300 |
| O  | 0.07941400  | -1.73042800 | -0.10484500 |
| C  | -5.88040200 | -2.60031200 | -1.82934800 |
| H  | -6.66220700 | -2.56257100 | -1.06498000 |
| H  | -6.25367900 | -2.05553700 | -2.70164800 |
| H  | -5.72171400 | -3.64652000 | -2.11392600 |
| O  | -3.11359700 | 5.46061500  | 1.27659500  |
| C  | -4.21043500 | 6.36092900  | 1.31167800  |
| H  | -3.81185600 | 7.30518600  | 1.68667200  |
| H  | -4.63368500 | 6.51514400  | 0.31059100  |
| H  | -4.99939000 | 6.00378400  | 1.98628400  |

### 5- OMe

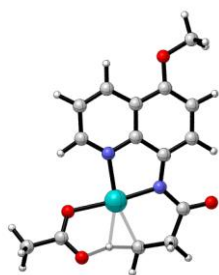

|   |             |            |            |
|---|-------------|------------|------------|
| C | -4.62895300 | 3.73463600 | 0.52574800 |
| C | -3.38254700 | 4.23154400 | 0.85890500 |
| C | -2.24892600 | 3.36665500 | 0.78758500 |
| C | -2.45161000 | 2.01898000 | 0.37506300 |
| C | -3.74061900 | 1.51114400 | 0.03362500 |
| C | -4.81389100 | 2.39263600 | 0.11768100 |
| H | -0.75626600 | 4.79100400 | 1.42004900 |
| H | -5.50398200 | 4.37301200 | 0.57138600 |
| C | -0.93066200 | 3.76863300 | 1.10268000 |

|    |             |             |             |
|----|-------------|-------------|-------------|
| H  | -5.80040400 | 2.03574500  | -0.14222000 |
| C  | -0.16070400 | 1.54882300  | 0.58634200  |
| C  | 0.10956900  | 2.86613700  | 1.00355900  |
| H  | 0.61707100  | 0.79831300  | 0.48893500  |
| H  | 1.12895500  | 3.15189700  | 1.24003800  |
| N  | -1.39010900 | 1.15204800  | 0.28810900  |
| C  | -4.85872000 | -0.50110700 | -0.83334300 |
| O  | -5.98948400 | -0.02566400 | -0.92482100 |
| C  | -4.52698400 | -1.91938800 | -1.28895500 |
| H  | -5.40813000 | -2.54233700 | -1.09385100 |
| H  | -4.41550300 | -1.88431000 | -2.38177200 |
| C  | -3.26713300 | -2.52524100 | -0.65424800 |
| H  | -3.38135200 | -2.66717300 | 0.42750800  |
| N  | -3.76032900 | 0.17104100  | -0.35716100 |
| Pd | -1.99243900 | -0.73151500 | -0.29362000 |
| C  | 0.11977700  | -2.49699000 | -1.04629900 |
| C  | 1.51171600  | -3.05693400 | -1.22319900 |
| H  | 2.24279000  | -2.47260800 | -0.66290200 |
| H  | 1.52826300  | -4.09696600 | -0.88110400 |
| H  | 1.76970800  | -3.06034800 | -2.28681600 |
| O  | -0.83226600 | -3.04651100 | -1.68414000 |
| O  | -0.04543600 | -1.50926600 | -0.26550800 |
| H  | -1.95651300 | -2.53138000 | -1.23085400 |
| H  | -3.14733800 | -3.54663200 | -1.04365300 |
| O  | -3.11383600 | 5.50829000  | 1.26346500  |
| C  | -4.19925300 | 6.41777900  | 1.35637900  |
| H  | -3.77046100 | 7.36385400  | 1.69141600  |
| H  | -4.68522000 | 6.56171600  | 0.38256200  |
| H  | -4.94577400 | 6.07663000  | 2.08543600  |

### 5- F\_sub

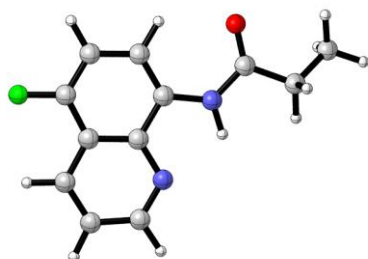

|   |             |             |             |
|---|-------------|-------------|-------------|
| C | -4.35452600 | -0.62300000 | -1.22082600 |
| C | -2.72405200 | 0.39478500  | 0.04831800  |
| C | -3.30660500 | 1.68215900  | -0.15599800 |
| C | -4.47908300 | 1.76119300  | -0.94598100 |
| C | -5.00519300 | 0.60702000  | -1.48019600 |
| H | -4.75568900 | -1.54702000 | -1.63480900 |



|   |             |             |             |
|---|-------------|-------------|-------------|
| C | -1.53426600 | 0.26633900  | 0.84320500  |
| C | -2.68041000 | 2.80112200  | 0.44095500  |
| H | -4.94110500 | 2.72824000  | -1.11607800 |
| H | -5.90222100 | 0.62569500  | -2.09111500 |
| C | -1.54569700 | 2.67272600  | 1.19735200  |
| C | -0.96435600 | 1.39892700  | 1.40262600  |
| H | -1.09488200 | 3.55579100  | 1.63792900  |
| H | -0.06853500 | 1.29815600  | 1.99874900  |
| N | -3.26152500 | -0.73441300 | -0.48983500 |
| N | -1.04606000 | -1.03715900 | 0.98094600  |
| H | -1.61852400 | -1.71845700 | 0.49136700  |
| C | 0.04903800  | -1.47147100 | 1.69175000  |
| O | 0.80098100  | -0.72390900 | 2.30512200  |
| C | 0.23384600  | -2.98967800 | 1.67968300  |
| H | -0.36135700 | -3.39447400 | 2.51112000  |
| H | -0.18966500 | -3.41782300 | 0.76211900  |
| C | 1.69975400  | -3.39391500 | 1.84669000  |
| H | 2.12137000  | -2.92760100 | 2.74064200  |
| H | 1.79241500  | -4.48118500 | 1.93671100  |
| H | 2.29849700  | -3.06924700 | 0.98892500  |
| F | -3.23882600 | 4.01799600  | 0.24183200  |

#### 5- F\_int

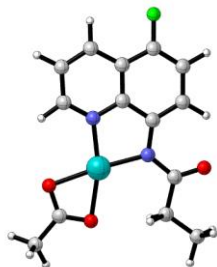

|   |             |            |             |
|---|-------------|------------|-------------|
| C | -4.52955700 | 3.73914000 | 0.59103000  |
| C | -3.29116700 | 4.21647100 | 0.93979700  |
| C | -2.15229500 | 3.38608700 | 0.88397300  |
| C | -2.35168000 | 2.04192700 | 0.45231800  |
| C | -3.62552100 | 1.51784200 | 0.08392200  |
| C | -4.70717200 | 2.40368600 | 0.16542000  |
| H | -0.67572100 | 4.81368100 | 1.55463000  |
| H | -5.38599500 | 4.40375300 | 0.64485200  |
| C | -0.84128100 | 3.79344300 | 1.22436700  |
| H | -5.69082400 | 2.05341200 | -0.10311800 |
| C | -0.05848700 | 1.58002100 | 0.70009300  |
| C | 0.20157000  | 2.89506700 | 1.13293500  |
| H | 0.72271000  | 0.83218900 | 0.61029300  |
| H | 1.21692300  | 3.17853600 | 1.38732700  |

|    |             |             |             |
|----|-------------|-------------|-------------|
| N  | -1.28568300 | 1.18976700  | 0.37863800  |
| C  | -4.77844700 | -0.47445900 | -0.70500200 |
| O  | -5.87903800 | 0.07599500  | -0.72953800 |
| C  | -4.63406700 | -1.93501900 | -1.11521300 |
| H  | -3.90556500 | -2.00702200 | -1.93136600 |
| H  | -4.18824400 | -2.49660400 | -0.28597200 |
| N  | -3.61840800 | 0.17521600  | -0.31272600 |
| Pd | -1.75462100 | -0.65478200 | -0.23740200 |
| C  | -0.47297400 | -2.73630500 | -0.61867500 |
| C  | 0.33519000  | -3.97383800 | -0.87980000 |
| H  | 0.62383500  | -3.99700600 | -1.93746000 |
| H  | 1.24365400  | -3.96924400 | -0.27323400 |
| H  | -0.26297600 | -4.86428600 | -0.67176000 |
| O  | -1.73022100 | -2.71185000 | -0.82157900 |
| O  | 0.08613600  | -1.65890500 | -0.20873600 |
| C  | -5.96825900 | -2.55642000 | -1.52955000 |
| H  | -6.69312900 | -2.51856500 | -0.71099000 |
| H  | -6.40747700 | -2.02147900 | -2.37680400 |
| H  | -5.82241200 | -3.60356800 | -1.81697400 |
| F  | -3.12490800 | 5.49578000  | 1.34696400  |

5- F

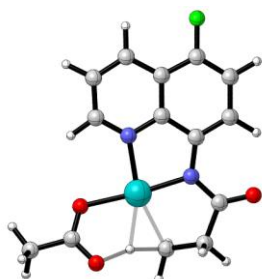

|   |             |            |             |
|---|-------------|------------|-------------|
| C | -4.53629000 | 3.77678600 | 0.66217400  |
| C | -3.27683300 | 4.21559000 | 0.98830300  |
| C | -2.15443900 | 3.36268200 | 0.89732300  |
| C | -2.38475500 | 2.02828600 | 0.45503900  |
| C | -3.68849000 | 1.55390200 | 0.11277200  |
| C | -4.75218300 | 2.45083200 | 0.22449700  |
| H | -0.63512800 | 4.75508800 | 1.55200800  |
| H | -5.37267600 | 4.46344200 | 0.74485000  |
| C | -0.82797900 | 3.74258400 | 1.21268100  |
| H | -5.74563400 | 2.11483900 | -0.03567900 |
| C | -0.10178400 | 1.52016500 | 0.63771100  |
| C | 0.19340200  | 2.82547800 | 1.08376900  |
| H | 0.66449900  | 0.76132000 | 0.51742700  |
| H | 1.21964100  | 3.08747600 | 1.31778600  |
| N | -1.33838700 | 1.14809900 | 0.33984100  |

|    |             |             |             |
|----|-------------|-------------|-------------|
| C  | -4.84965100 | -0.41712800 | -0.78927800 |
| O  | -5.97168700 | 0.07894800  | -0.85696400 |
| C  | -4.54413500 | -1.82832800 | -1.28227800 |
| H  | -5.43471400 | -2.44093400 | -1.09864300 |
| H  | -4.43700600 | -1.76656000 | -2.37430100 |
| C  | -3.29192900 | -2.47129700 | -0.66964900 |
| H  | -3.39988500 | -2.63338300 | 0.40986300  |
| N  | -3.73359100 | 0.22726700  | -0.30747200 |
| Pd | -1.98058600 | -0.71080100 | -0.27983500 |
| C  | 0.09013900  | -2.49560300 | -1.09106600 |
| C  | 1.47123900  | -3.07410800 | -1.29000800 |
| H  | 2.21573500  | -2.51536800 | -0.72142900 |
| H  | 1.47219700  | -4.12188600 | -0.97208400 |
| H  | 1.72209200  | -3.05727200 | -2.35517400 |
| O  | -0.87577300 | -3.01276500 | -1.73341600 |
| O  | -0.05227600 | -1.52257100 | -0.28594200 |
| H  | -1.99164100 | -2.48665100 | -1.25609100 |
| H  | -3.19453800 | -3.48651700 | -1.08067700 |
| F  | -3.07288700 | 5.48532900  | 1.40934400  |

#### 5- Br\_sub

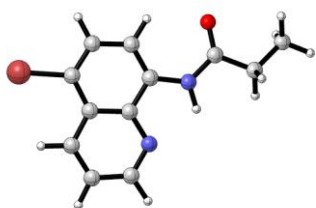

|   |             |             |             |
|---|-------------|-------------|-------------|
| C | -4.38772900 | -0.63786500 | -1.17492400 |
| C | -2.73353800 | 0.41176800  | 0.04102400  |
| C | -3.33091800 | 1.69941200  | -0.14485400 |
| C | -4.52838600 | 1.74420800  | -0.90250900 |
| C | -5.05757300 | 0.58281800  | -1.41683200 |
| H | -4.78728200 | -1.56995800 | -1.57161800 |
| C | -1.51850400 | 0.27845400  | 0.79807000  |
| C | -2.68758200 | 2.82543800  | 0.43750400  |
| H | -5.01262200 | 2.70085200  | -1.06651500 |
| H | -5.97320100 | 0.59325300  | -1.99973000 |
| C | -1.52539100 | 2.67682200  | 1.15732200  |
| C | -0.93269400 | 1.40843600  | 1.34341800  |
| H | -1.04827000 | 3.54736900  | 1.59404500  |
| H | -0.01897900 | 1.31183200  | 1.91260300  |
| N | -3.27270800 | -0.72556300 | -0.47641800 |
| N | -1.02730300 | -1.02150700 | 0.91552300  |

|    |             |             |            |
|----|-------------|-------------|------------|
| H  | -1.61444400 | -1.70080100 | 0.43910000 |
| C  | 0.09045800  | -1.46027700 | 1.59375900 |
| O  | 0.85541700  | -0.71615700 | 2.19217800 |
| C  | 0.27615200  | -2.97772400 | 1.54732300 |
| H  | -0.50277800 | -3.42923000 | 2.17902900 |
| H  | 0.08303200  | -3.33678900 | 0.52743600 |
| C  | 1.66172100  | -3.41071100 | 2.02428200 |
| H  | 1.85528000  | -3.04002600 | 3.03417100 |
| H  | 1.74087600  | -4.50278900 | 2.02862700 |
| H  | 2.44462000  | -3.01065400 | 1.37236900 |
| Br | -3.43113500 | 4.57789300  | 0.22963100 |

### 5- Br\_int

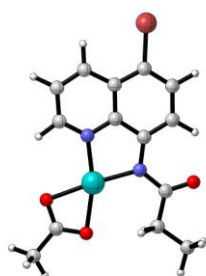

|    |             |             |             |
|----|-------------|-------------|-------------|
| C  | -4.48307300 | 3.74188600  | 0.58728900  |
| C  | -3.22662100 | 4.19985300  | 0.92072500  |
| C  | -2.10919900 | 3.32836900  | 0.84791100  |
| C  | -2.35405200 | 1.98793900  | 0.41978300  |
| C  | -3.65342700 | 1.50605600  | 0.07335500  |
| C  | -4.70903500 | 2.41534800  | 0.16797600  |
| H  | -0.55601400 | 4.68278800  | 1.49455500  |
| H  | -5.32907900 | 4.41810700  | 0.64777800  |
| C  | -0.77208700 | 3.67203400  | 1.16554000  |
| H  | -5.70609700 | 2.08839400  | -0.08612100 |
| C  | -0.07425400 | 1.43301300  | 0.62709000  |
| C  | 0.23407900  | 2.73654500  | 1.05833000  |
| H  | 0.67014600  | 0.65215800  | 0.52136500  |
| H  | 1.26161400  | 2.98600000  | 1.29948200  |
| N  | -1.31971400 | 1.09321400  | 0.32562400  |
| C  | -4.90489000 | -0.42487800 | -0.68389400 |
| O  | -5.98498400 | 0.16504500  | -0.68581800 |
| C  | -4.82958100 | -1.88868900 | -1.11492600 |
| H  | -4.10864800 | -1.95395300 | -1.93816600 |
| H  | -4.38969600 | -2.46452000 | -0.29067300 |
| N  | -3.71224300 | 0.17222800  | -0.32098100 |
| Pd | -1.89105700 | -0.73203100 | -0.29320000 |
| C  | -0.55376000 | -2.65394700 | -0.59656400 |
| C  | 0.37873200  | -3.82351300 | -0.83384300 |

|    |             |             |             |
|----|-------------|-------------|-------------|
| H  | 1.07874800  | -3.57212600 | -1.63770700 |
| H  | 0.96730700  | -4.01306000 | 0.06900400  |
| H  | -0.18400500 | -4.71909500 | -1.10712800 |
| O  | -1.78554100 | -2.71589000 | -0.78448400 |
| O  | -0.01913700 | -1.53525300 | -0.20726700 |
| C  | -6.16066400 | -2.50095900 | -1.52998900 |
| H  | -6.84175100 | -2.66734300 | -0.67267800 |
| H  | -6.65700200 | -1.92937000 | -2.31944400 |
| H  | -6.00146900 | -3.51866600 | -1.91242900 |
| Br | -3.00475100 | 6.01346300  | 1.48067100  |

**5- Br**

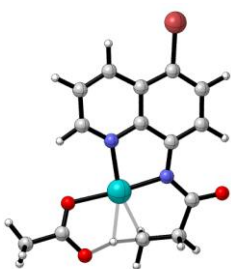

|    |             |             |             |
|----|-------------|-------------|-------------|
| C  | -4.53521100 | 3.77278100  | 0.65125600  |
| C  | -3.27946600 | 4.23580300  | 0.98272100  |
| C  | -2.15150100 | 3.37832700  | 0.89273700  |
| C  | -2.38178900 | 2.03981900  | 0.45156100  |
| C  | -3.68506800 | 1.55708900  | 0.10798200  |
| C  | -4.75138400 | 2.44960800  | 0.21675700  |
| H  | -0.60781000 | 4.74440800  | 1.54215100  |
| H  | -5.38567100 | 4.44196700  | 0.72624000  |
| C  | -0.81509000 | 3.73522400  | 1.20250200  |
| H  | -5.74534100 | 2.11367200  | -0.04156200 |
| C  | -0.10020600 | 1.51109200  | 0.62873000  |
| C  | 0.20090000  | 2.81313900  | 1.07286600  |
| H  | 0.65878000  | 0.74540900  | 0.50671600  |
| H  | 1.22787400  | 3.07285500  | 1.30627900  |
| N  | -1.34118600 | 1.15265400  | 0.33472400  |
| C  | -4.84871500 | -0.41474400 | -0.78605100 |
| O  | -5.97094600 | 0.07880800  | -0.84915300 |
| C  | -4.54198700 | -1.82509300 | -1.27949500 |
| H  | -5.43339400 | -2.43720000 | -1.09871900 |
| H  | -4.43256600 | -1.76138300 | -2.37121500 |
| C  | -3.29104700 | -2.46934200 | -0.66566500 |
| H  | -3.39911200 | -2.62954100 | 0.41410800  |
| N  | -3.72945700 | 0.23395700  | -0.30872000 |
| Pd | -1.97962600 | -0.70751100 | -0.28048500 |
| C  | 0.09007600  | -2.49602800 | -1.08569200 |

|    |             |             |             |
|----|-------------|-------------|-------------|
| C  | 1.47151800  | -3.07446000 | -1.28132300 |
| H  | 2.21533700  | -2.51339100 | -0.71419900 |
| H  | 1.47255000  | -4.12107800 | -0.95962500 |
| H  | 1.72310700  | -3.06137700 | -2.34635800 |
| O  | -0.87535100 | -3.01548100 | -1.72644600 |
| O  | -0.05331400 | -1.51984300 | -0.28399100 |
| H  | -1.99182700 | -2.48723800 | -1.25081000 |
| H  | -3.19633100 | -3.48538600 | -1.07519800 |
| Br | -3.07366000 | 6.04468600  | 1.56597000  |

### 5- H\_sub

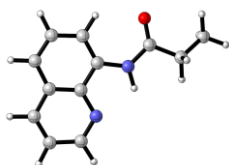

|   |             |             |             |
|---|-------------|-------------|-------------|
| C | 2.25797200  | -2.26589200 | -0.00020800 |
| C | 1.17539100  | -0.23313500 | -0.00555800 |
| C | 2.40546500  | 0.49146900  | 0.03117500  |
| C | 3.59890600  | -0.27456300 | 0.05174300  |
| C | 3.53107500  | -1.64923900 | 0.03633400  |
| H | 2.17967600  | -3.35220700 | -0.01306300 |
| C | -0.06970000 | 0.48514400  | -0.02834000 |
| C | 2.38118800  | 1.91008600  | 0.04498500  |
| H | 4.55766700  | 0.23802900  | 0.07981500  |
| H | 4.42816600  | -2.26056200 | 0.05161000  |
| C | 1.17187100  | 2.56822600  | 0.02321700  |
| C | -0.05844800 | 1.87081200  | -0.01292300 |
| H | 1.14797700  | 3.65455400  | 0.03417300  |
| H | -0.99763400 | 2.40567000  | -0.02866900 |
| N | 1.12261400  | -1.59418700 | -0.02056400 |
| N | -1.21547000 | -0.31388700 | -0.06450700 |
| H | -0.99255000 | -1.30524900 | -0.07338400 |
| C | -2.53514200 | 0.07464100  | -0.11477700 |
| O | -2.90220500 | 1.24275200  | -0.09997700 |
| C | -3.51845900 | -1.09211100 | -0.22514600 |
| H | -3.60533100 | -1.34302800 | -1.29241600 |
| H | -3.10641500 | -1.98301000 | 0.26605700  |
| C | -4.89590900 | -0.74278400 | 0.34033700  |
| H | -5.27783600 | 0.16821600  | -0.12723000 |
| H | -5.60486100 | -1.55762200 | 0.16040600  |
| H | -4.84528800 | -0.56506100 | 1.41988100  |
| H | 3.31881400  | 2.45885500  | 0.07308800  |

5- H\_int

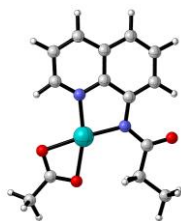

|    |             |             |             |
|----|-------------|-------------|-------------|
| C  | -3.92390500 | 1.63397500  | 0.00781400  |
| C  | -4.33231700 | 0.31597000  | 0.00821700  |
| C  | -3.34766100 | -0.70004100 | 0.00450300  |
| C  | -1.97473700 | -0.31287200 | 0.00078200  |
| C  | -1.55012000 | 1.05046300  | 0.00044600  |
| C  | -2.56407500 | 2.01554000  | 0.00381000  |
| H  | -4.66499400 | -2.41618300 | 0.00690300  |
| H  | -4.67075600 | 2.42365700  | 0.01052100  |
| C  | -3.62838500 | -2.08879200 | 0.00419200  |
| H  | -2.29301800 | 3.05900600  | 0.00350700  |
| C  | -1.27122900 | -2.55836000 | -0.00289500 |
| C  | -2.60354500 | -3.01252300 | 0.00033000  |
| H  | -0.42321800 | -3.23530400 | -0.00575500 |
| H  | -2.80076600 | -4.07904600 | -0.00027700 |
| N  | -0.99036200 | -1.26099800 | -0.00243200 |
| C  | 0.40398200  | 2.50274600  | -0.00179300 |
| O  | -0.26089800 | 3.53776200  | 0.00281400  |
| C  | 1.92703600  | 2.56244400  | -0.00752700 |
| H  | 2.31105500  | 2.00288600  | 0.85331100  |
| H  | 2.30225400  | 2.02466300  | -0.88631500 |
| N  | -0.16446100 | 1.23676000  | -0.00320000 |
| Pd | 0.86679000  | -0.52496400 | -0.00626800 |
| C  | 3.12924400  | -1.53334400 | -0.00790300 |
| C  | 4.48685200  | -2.17341800 | 0.03057800  |
| H  | 4.81440900  | -2.25742900 | 1.07371300  |
| H  | 4.44623700  | -3.17610500 | -0.40097300 |
| H  | 5.21042200  | -1.55279600 | -0.50350100 |
| O  | 2.99495600  | -0.26726600 | -0.01145000 |
| O  | 2.06585200  | -2.24776500 | -0.01127700 |
| C  | 2.45096800  | 3.99882400  | 0.00770500  |
| H  | 2.09796900  | 4.55748300  | -0.86413700 |
| H  | 2.10756200  | 4.53511700  | 0.89733500  |
| H  | 3.54660200  | 4.00003100  | 0.00199900  |
| H  | -5.38423800 | 0.04650200  | 0.01116600  |

5- H

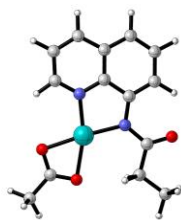

|    |             |             |             |
|----|-------------|-------------|-------------|
| C  | -4.30295000 | 0.71811000  | 0.16445200  |
| C  | -4.31827200 | -0.66199300 | 0.13999300  |
| C  | -3.09037700 | -1.36457100 | 0.06120000  |
| C  | -1.87913300 | -0.61557000 | 0.00734100  |
| C  | -1.87334500 | 0.81507000  | 0.03188600  |
| C  | -3.10553500 | 1.46527500  | 0.11186100  |
| H  | -3.88183400 | -3.37978200 | 0.07102900  |
| H  | -5.24227100 | 1.26145000  | 0.22544200  |
| C  | -2.97750900 | -2.77749000 | 0.03232800  |
| H  | -3.12381800 | 2.54533800  | 0.13754200  |
| C  | -0.58417000 | -2.57002400 | -0.09032300 |
| C  | -1.73847100 | -3.37785300 | -0.04290200 |
| H  | 0.41576100  | -2.98719000 | -0.14860400 |
| H  | -1.63332400 | -4.45737800 | -0.06573500 |
| N  | -0.66283400 | -1.24724100 | -0.06606100 |
| C  | -0.34269600 | 2.74014700  | 0.09666700  |
| O  | -1.19403000 | 3.61897100  | 0.20247400  |
| C  | 1.15290900  | 3.04088900  | 0.12467200  |
| H  | 1.29890900  | 4.02268400  | -0.34111600 |
| H  | 1.43188500  | 3.16055700  | 1.18099400  |
| C  | 2.04108900  | 1.97518200  | -0.53246600 |
| H  | 1.85089800  | 1.89000000  | -1.60948900 |
| N  | -0.60972000 | 1.39375200  | -0.01974400 |
| Pd | 0.89162900  | 0.09896300  | -0.17241300 |
| C  | 3.48823900  | -1.01910100 | 0.21105400  |
| C  | 4.58799500  | -2.04511300 | 0.35129900  |
| H  | 4.23127900  | -3.04054500 | 0.08363100  |
| H  | 5.42625900  | -1.76573000 | -0.29537700 |
| H  | 4.95737500  | -2.04323800 | 1.38153000  |
| O  | 3.74306600  | 0.18184100  | 0.53809200  |
| O  | 2.35867200  | -1.39359400 | -0.23362500 |
| H  | 2.72033600  | 0.91845700  | 0.14936500  |
| H  | 3.08398100  | 2.31902600  | -0.47494700 |
| H  | -5.25079500 | -1.21698800 | 0.17948100  |

5-F\_6-F\_sub



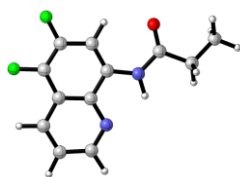

|   |             |             |             |
|---|-------------|-------------|-------------|
| C | -1.49099200 | 2.98946300  | 0.00564700  |
| C | -0.74596100 | 0.81074600  | -0.00133100 |
| C | -2.08079300 | 0.30250400  | 0.01003600  |
| C | -3.14276900 | 1.24125500  | 0.01898600  |
| C | -2.84777300 | 2.58505800  | 0.01672300  |
| H | -1.23873400 | 4.04863400  | 0.00372500  |
| C | 0.36495400  | -0.10180300 | -0.01232500 |
| C | -2.28010000 | -1.09520700 | 0.01112100  |
| H | -4.16749900 | 0.88451300  | 0.02740200  |
| H | -3.63422600 | 3.33318600  | 0.02322000  |
| C | -1.19786900 | -1.94208900 | 0.00075200  |
| C | 0.12650100  | -1.46615600 | -0.01074000 |
| N | -0.47797700 | 2.14398800  | -0.00301400 |
| N | 1.62799300  | 0.48968300  | -0.02345500 |
| H | 1.58041600  | 1.50471100  | -0.02383500 |
| C | 2.86108500  | -0.12656500 | -0.06142500 |
| O | 3.00826000  | -1.34127800 | -0.06051100 |
| C | 4.03413900  | 0.85166500  | -0.12958100 |
| H | 4.05419600  | 1.27649400  | -1.14388300 |
| H | 3.84699700  | 1.69545800  | 0.54797300  |
| C | 5.37025200  | 0.18162000  | 0.18895700  |
| H | 5.54265400  | -0.66821300 | -0.47633000 |
| H | 6.19329700  | 0.89411400  | 0.07169800  |
| H | 5.38554700  | -0.19667200 | 1.21600200  |
| F | -3.53644400 | -1.58522100 | 0.02252300  |
| F | -1.40236500 | -3.26924900 | 0.00203900  |
| H | 0.94640400  | -2.17041600 | -0.01857900 |

#### 5-F\_6-F\_int

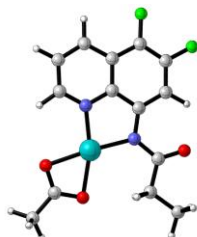

|   |             |             |             |
|---|-------------|-------------|-------------|
| C | -3.64321400 | 1.08143000  | 0.00536100  |
| C | -3.88316500 | -0.27532100 | 0.00474300  |
| C | -2.79317300 | -1.16550800 | 0.00151300  |
| C | -1.47990200 | -0.60916700 | -0.00115700 |

|    |             |             |             |
|----|-------------|-------------|-------------|
| C  | -1.22671000 | 0.79642700  | -0.00094800 |
| C  | -2.34982600 | 1.62987700  | 0.00238600  |
| H  | -3.90926500 | -3.01767200 | 0.00273700  |
| C  | -2.91804800 | -2.57634500 | 0.00078100  |
| C  | -0.51720900 | -2.75430600 | -0.00464200 |
| C  | -1.78711500 | -3.36481700 | -0.00246100 |
| H  | 0.40491000  | -3.32599900 | -0.00691600 |
| H  | -1.85435300 | -4.44719500 | -0.00335800 |
| N  | -0.39178500 | -1.43296300 | -0.00380200 |
| C  | 0.52083700  | 2.48432500  | -0.00305200 |
| O  | -0.27755100 | 3.41983100  | 0.00121100  |
| C  | 2.02201700  | 2.74229000  | -0.00855700 |
| H  | 2.47464900  | 2.23760600  | 0.85299100  |
| H  | 2.46367400  | 2.25655400  | -0.88689400 |
| N  | 0.12193900  | 1.15437000  | -0.00404500 |
| Pd | 1.36235200  | -0.46866000 | -0.00615200 |
| C  | 3.73060600  | -1.17920400 | -0.00559000 |
| C  | 5.15832100  | -1.63912200 | 0.03426700  |
| H  | 5.49280800  | -1.68029000 | 1.07777300  |
| H  | 5.24706400  | -2.63869600 | -0.39721900 |
| H  | 5.79648300  | -0.93055400 | -0.49922700 |
| O  | 3.43283300  | 0.05930700  | -0.00988600 |
| O  | 2.76615500  | -2.02305900 | -0.00970100 |
| C  | 2.35421200  | 4.23470800  | 0.00555800  |
| H  | 1.93205500  | 4.74185300  | -0.86696800 |
| H  | 1.94382200  | 4.72237600  | 0.89473200  |
| H  | 3.44026100  | 4.37828200  | 0.00013000  |
| F  | -5.14012400 | -0.76173700 | 0.00723600  |
| F  | -4.69015300 | 1.92056400  | 0.00887900  |
| H  | -2.23619000 | 2.70257700  | 0.00290500  |

**5-F\_6-F\_TS**

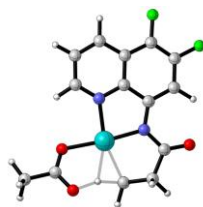

|   |             |             |             |
|---|-------------|-------------|-------------|
| C | -3.84478800 | 0.71606900  | 0.10463500  |
| C | -3.85729000 | -0.66221200 | 0.07893300  |
| C | -2.64042300 | -1.37015500 | 0.01310500  |
| C | -1.43090600 | -0.61791000 | -0.02755100 |
| C | -1.42579900 | 0.81287900  | -0.00313200 |
| C | -2.65666800 | 1.46509200  | 0.06475000  |
| H | -3.45292200 | -3.37589800 | 0.01488200  |

|    |             |             |             |
|----|-------------|-------------|-------------|
| C  | -2.54410800 | -2.78385400 | -0.01406900 |
| C  | -0.14530800 | -2.57726200 | -0.10977700 |
| C  | -1.30410800 | -3.38172600 | -0.07542800 |
| H  | 0.85349400  | -2.99832100 | -0.15622800 |
| H  | -1.20128900 | -4.46134800 | -0.09701800 |
| N  | -0.21857400 | -1.25425200 | -0.08683200 |
| C  | 0.09462600  | 2.73982800  | 0.07459800  |
| O  | -0.76541500 | 3.61100600  | 0.16821100  |
| C  | 1.58833400  | 3.04495100  | 0.11852600  |
| H  | 1.73844200  | 4.02390900  | -0.35162200 |
| H  | 1.85484000  | 3.17140300  | 1.17717600  |
| C  | 2.48623200  | 1.97745000  | -0.52314400 |
| H  | 2.31009800  | 1.88658200  | -1.60197800 |
| N  | -0.16505300 | 1.39180900  | -0.04171500 |
| Pd | 1.33860600  | 0.09664600  | -0.17460200 |
| C  | 3.92948100  | -1.01286500 | 0.24370400  |
| C  | 5.02789600  | -2.03820600 | 0.39657000  |
| H  | 4.67491900  | -3.03417800 | 0.12615100  |
| H  | 5.87254900  | -1.75873900 | -0.24168400 |
| H  | 5.38647300  | -2.03470600 | 1.43055800  |
| O  | 4.17700700  | 0.18772000  | 0.57402400  |
| O  | 2.80531500  | -1.38976500 | -0.21596800 |
| H  | 3.15274200  | 0.92669600  | 0.16894600  |
| H  | 3.52790400  | 2.32250700  | -0.45370800 |
| F  | -5.01953200 | -1.34450200 | 0.11596300  |
| F  | -5.01430700 | 1.37057800  | 0.16879200  |
| H  | -2.70144900 | 2.54465300  | 0.09280300  |

**5-F\_7-F\_sub**

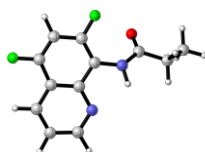

|   |             |             |             |
|---|-------------|-------------|-------------|
| C | -1.74318900 | 2.77908000  | -0.10498700 |
| C | -0.90978700 | 0.63444700  | -0.16012500 |
| C | -2.20456000 | 0.08348100  | 0.09182600  |
| C | -3.28879700 | 0.97694900  | 0.25917700  |
| C | -3.05890600 | 2.33054800  | 0.16280100  |
| H | -1.54386400 | 3.84615900  | -0.19456200 |
| C | 0.22362300  | -0.22215900 | -0.33965500 |
| C | -2.32516500 | -1.32436900 | 0.15922400  |
| H | -4.27965500 | 0.58042400  | 0.45571100  |
| H | -3.86236100 | 3.05014600  | 0.28303900  |
| C | -1.25459800 | -2.15391300 | -0.04200500 |

|   |             |             |             |
|---|-------------|-------------|-------------|
| C | 0.00853800  | -1.58868500 | -0.31756100 |
| H | -1.36275900 | -3.23165100 | -0.01368600 |
| N | -0.70613800 | 1.97774000  | -0.25962600 |
| N | 1.46710600  | 0.37504400  | -0.58839300 |
| H | 1.37555300  | 1.34476600  | -0.87468600 |
| C | 2.65146800  | 0.02327400  | 0.05404400  |
| O | 2.74590700  | -0.93358700 | 0.80094400  |
| C | 3.82847600  | 0.92912200  | -0.30702400 |
| H | 4.11670400  | 0.69886800  | -1.34250200 |
| H | 3.49845500  | 1.97727700  | -0.31405800 |
| C | 5.01786800  | 0.73906200  | 0.63310600  |
| H | 5.33416600  | -0.30716300 | 0.64547900  |
| H | 5.86241800  | 1.35917600  | 0.31468200  |
| H | 4.75605600  | 1.01435500  | 1.65974400  |
| F | -3.54322200 | -1.84628700 | 0.41499400  |
| F | 1.00338200  | -2.43973300 | -0.59538300 |

#### 5-F\_7-F\_int

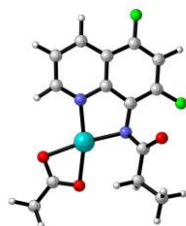

|   |             |             |             |
|---|-------------|-------------|-------------|
| C | -3.68367800 | 1.15228900  | -0.46575800 |
| C | -3.96213600 | -0.15255000 | -0.14534400 |
| C | -2.92904300 | -1.08008300 | 0.11212300  |
| C | -1.59537300 | -0.57859500 | 0.06512700  |
| C | -1.26638400 | 0.77689300  | -0.19233700 |
| C | -2.34680600 | 1.59845500  | -0.51787200 |
| H | -4.12824000 | -2.84809900 | 0.43629200  |
| H | -4.47913500 | 1.84962600  | -0.70215900 |
| C | -3.11893400 | -2.45203800 | 0.39122000  |
| C | -0.72826700 | -2.71594300 | 0.50035800  |
| C | -2.02252700 | -3.26634100 | 0.59187700  |
| H | 0.16513300  | -3.32047900 | 0.62054700  |
| H | -2.13494000 | -4.32361400 | 0.80447500  |
| N | -0.53549400 | -1.42783900 | 0.24795000  |
| C | 0.46913100  | 2.33386600  | 0.38345100  |
| O | -0.34174900 | 3.09454800  | 0.89710100  |
| C | 1.95204400  | 2.67457100  | 0.29859200  |
| H | 2.50848300  | 1.99551200  | 0.95704500  |
| H | 2.31077900  | 2.45133100  | -0.71246800 |
| N | 0.09040400  | 1.10862400  | -0.17146000 |

|    |             |             |             |
|----|-------------|-------------|-------------|
| Pd | 1.25656000  | -0.55423500 | -0.06495800 |
| C  | 3.60149100  | -1.28762900 | -0.27464000 |
| C  | 5.02122000  | -1.74186700 | -0.44822500 |
| H  | 5.70926600  | -0.96711800 | -0.10103400 |
| H  | 5.18879600  | -2.67660500 | 0.09147100  |
| H  | 5.21416500  | -1.91502000 | -1.51366500 |
| O  | 3.28132200  | -0.05967000 | -0.41240600 |
| O  | 2.66749300  | -2.12127100 | -0.01035700 |
| C  | 2.23423100  | 4.12882700  | 0.67891100  |
| H  | 1.72199500  | 4.82020500  | 0.00224300  |
| H  | 1.88241100  | 4.34483700  | 1.69151700  |
| H  | 3.30980800  | 4.33164200  | 0.63085900  |
| F  | -5.23786800 | -0.58863500 | -0.09956900 |
| F  | -2.15779800 | 2.84853800  | -0.94621600 |

### 5-F\_7-F\_TS

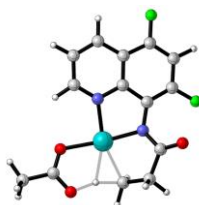

|   |             |             |             |
|---|-------------|-------------|-------------|
| C | -3.97874800 | 0.65824700  | -0.09439100 |
| C | -3.95416500 | -0.70460000 | 0.05499100  |
| C | -2.73606100 | -1.41954300 | 0.09153600  |
| C | -1.53539100 | -0.65480400 | 0.01309700  |
| C | -1.52094100 | 0.76906500  | -0.07639900 |
| C | -2.77020000 | 1.37897400  | -0.19165300 |
| H | -3.53950900 | -3.41983000 | 0.24217100  |
| H | -4.91768500 | 1.19531600  | -0.16366000 |
| C | -2.63298000 | -2.82683300 | 0.17776800  |
| C | -0.23922400 | -2.60956600 | 0.06849200  |
| C | -1.38836200 | -3.42080500 | 0.16897700  |
| H | 0.76252100  | -3.02621200 | 0.04220500  |
| H | -1.27601500 | -4.49780300 | 0.22894200  |
| N | -0.31655300 | -1.28866200 | -0.00592300 |
| C | 0.03655500  | 2.59981000  | 0.42567900  |
| O | -0.76570100 | 3.32432800  | 0.99432100  |
| C | 1.51747000  | 2.95343400  | 0.28312900  |
| H | 1.57097600  | 3.96835400  | -0.13275800 |
| H | 1.92328300  | 3.02735100  | 1.30034200  |
| C | 2.34369900  | 1.96690400  | -0.55300900 |
| H | 2.04037200  | 1.95998400  | -1.60597100 |
| N | -0.26404900 | 1.36522200  | -0.12900200 |

|    |             |             |             |
|----|-------------|-------------|-------------|
| Pd | 1.23797300  | 0.05637000  | -0.21997000 |
| C  | 3.85363500  | -1.04765900 | 0.12826500  |
| C  | 4.95689800  | -2.07049100 | 0.26436400  |
| H  | 4.57340600  | -3.08163200 | 0.12175200  |
| H  | 5.73236600  | -1.86249400 | -0.48044400 |
| H  | 5.42020100  | -1.97844100 | 1.25132400  |
| O  | 4.13222800  | 0.16952400  | 0.35815700  |
| O  | 2.69727300  | -1.44245800 | -0.22012100 |
| H  | 3.08520900  | 0.89182600  | 0.01486000  |
| H  | 3.38516100  | 2.31901300  | -0.57857400 |
| F  | -5.10569100 | -1.40294400 | 0.13885200  |
| F  | -2.87945900 | 2.68424000  | -0.45007500 |

**5-Cl\_6-Cl\_sub**

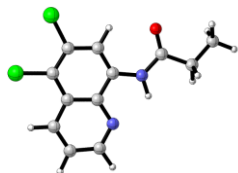

|   |             |             |             |
|---|-------------|-------------|-------------|
| C | -0.53822300 | 3.49279100  | 0.00457500  |
| C | -0.21174600 | 1.21200700  | -0.00148400 |
| C | -1.61509900 | 0.94516000  | 0.00558200  |
| C | -2.47661700 | 2.07247400  | 0.01184500  |
| C | -1.94256400 | 3.34109600  | 0.01133000  |
| H | -0.09301400 | 4.48628200  | 0.00410100  |
| C | 0.72644100  | 0.12265600  | -0.00961400 |
| C | -2.06475100 | -0.40812500 | 0.00536700  |
| H | -3.55010000 | 1.92114400  | 0.01706800  |
| H | -2.58317200 | 4.21731500  | 0.01604700  |
| C | -1.13401200 | -1.43052500 | -0.00203400 |
| C | 0.25727800  | -1.17722300 | -0.00931900 |
| N | 0.29745100  | 2.47205200  | -0.00159000 |
| N | 2.07007100  | 0.48813600  | -0.01697900 |
| H | 2.19614500  | 1.49677000  | -0.01736500 |
| C | 3.18264800  | -0.32960900 | -0.04577400 |
| O | 3.12132500  | -1.55074400 | -0.04388400 |
| C | 4.50330900  | 0.43809200  | -0.09990200 |
| H | 4.57494700  | 0.91238600  | -1.08958100 |
| H | 4.47305700  | 1.26094500  | 0.62719600  |
| C | 5.71251900  | -0.46285300 | 0.14644900  |
| H | 5.73478900  | -1.28550900 | -0.57299300 |
| H | 6.64077800  | 0.11034500  | 0.05419500  |
| H | 5.67664800  | -0.90350300 | 1.14754200  |
| H | 0.95448000  | -2.00230700 | -0.01475200 |

|    |             |             |             |
|----|-------------|-------------|-------------|
| Cl | -3.78135800 | -0.74355400 | 0.01457100  |
| Cl | -1.62822500 | -3.10496800 | -0.00236700 |

5-Cl\_6-Cl\_int

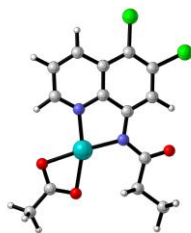

|    |             |             |             |
|----|-------------|-------------|-------------|
| C  | -3.27732100 | 0.88295600  | 0.00377300  |
| C  | -3.46460000 | -0.49069100 | 0.00295300  |
| C  | -2.31946700 | -1.33216000 | -0.00087600 |
| C  | -1.03290600 | -0.71751000 | -0.00306200 |
| C  | -0.84097100 | 0.69858600  | -0.00248300 |
| C  | -1.99855900 | 1.47975300  | 0.00066700  |
| H  | -3.31878500 | -3.25038300 | -0.00181500 |
| C  | -2.35730100 | -2.74958800 | -0.00279700 |
| C  | 0.04668300  | -2.80843700 | -0.00744900 |
| C  | -1.18786300 | -3.48064500 | -0.00623700 |
| H  | 0.99877800  | -3.32863100 | -0.00967800 |
| H  | -1.20376500 | -4.56497000 | -0.00803000 |
| N  | 0.09790300  | -1.48216000 | -0.00578200 |
| C  | 0.82624300  | 2.46826400  | -0.00449600 |
| O  | -0.01228000 | 3.36669200  | -0.00049000 |
| C  | 2.31409900  | 2.79205300  | -0.00992400 |
| H  | 2.78803100  | 2.30852100  | 0.85229900  |
| H  | 2.77680700  | 2.32512700  | -0.88761900 |
| N  | 0.48686800  | 1.11927200  | -0.00522100 |
| Pd | 1.80510000  | -0.43971900 | -0.00625900 |
| C  | 4.20313700  | -1.04171100 | -0.00233400 |
| C  | 5.64983500  | -1.43676100 | 0.03953800  |
| H  | 5.98415300  | -1.46320100 | 1.08357800  |
| H  | 5.78419800  | -2.43116600 | -0.39209100 |
| H  | 6.25619300  | -0.69993600 | -0.49273900 |
| O  | 3.84907800  | 0.18189400  | -0.00717300 |
| O  | 3.27725700  | -1.92799500 | -0.00764700 |
| C  | 2.58019300  | 4.29766400  | 0.00269200  |
| H  | 2.13672000  | 4.78478400  | -0.87064800 |
| H  | 2.14848500  | 4.76771700  | 0.89122400  |
| H  | 3.65886700  | 4.48857300  | -0.00244700 |
| H  | -1.91590700 | 2.55446700  | 0.00091200  |
| Cl | -5.05850700 | -1.20499000 | 0.00677700  |
| Cl | -4.64628200 | 1.96622800  | 0.00879200  |

## 5-Cl\_6-Cl\_TS

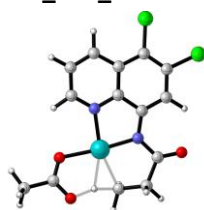

|    |             |             |             |
|----|-------------|-------------|-------------|
| C  | -3.43006100 | 0.70320600  | 0.06468400  |
| C  | -3.44676500 | -0.68358700 | 0.04241600  |
| C  | -2.21123000 | -1.38812500 | -0.01293700 |
| C  | -1.00364700 | -0.63272800 | -0.04559000 |
| C  | -1.00020900 | 0.79881600  | -0.02402800 |
| C  | -2.23108000 | 1.44677400  | 0.03220500  |
| H  | -2.98294700 | -3.41069300 | -0.01579800 |
| C  | -2.08655600 | -2.80127300 | -0.03775700 |
| C  | 0.30865800  | -2.57713400 | -0.11509200 |
| C  | -0.84091800 | -3.38927600 | -0.08852700 |
| H  | 1.31313600  | -2.98521500 | -0.15341600 |
| H  | -0.73218600 | -4.46833700 | -0.10763300 |
| N  | 0.21648800  | -1.25538300 | -0.09445200 |
| C  | 0.50973000  | 2.73499800  | 0.06097800  |
| O  | -0.35367200 | 3.60272100  | 0.14315000  |
| C  | 2.00148100  | 3.04599900  | 0.11881900  |
| H  | 2.15091000  | 4.02673900  | -0.34762100 |
| H  | 2.25733600  | 3.17120900  | 1.18025500  |
| C  | 2.91044300  | 1.98423600  | -0.51654300 |
| H  | 2.74301800  | 1.89222200  | -1.59664900 |
| N  | 0.25567000  | 1.38330400  | -0.05324100 |
| Pd | 1.76873200  | 0.09935300  | -0.17342100 |
| C  | 4.36210200  | -0.99835500 | 0.26208500  |
| C  | 5.46285900  | -2.01983700 | 0.42258300  |
| H  | 5.11437700  | -3.01762900 | 0.15310700  |
| H  | 6.30944200  | -1.73924600 | -0.21260800 |
| H  | 5.81674400  | -2.01243200 | 1.45814800  |
| O  | 4.60327100  | 0.20356100  | 0.59114300  |
| O  | 3.24133100  | -1.37999900 | -0.20298200 |
| H  | 3.57737100  | 0.93818100  | 0.17906100  |
| H  | 3.94925300  | 2.33614100  | -0.43929200 |
| H  | -2.26279900 | 2.52619100  | 0.05593400  |
| Cl | -4.94519600 | -1.58194900 | 0.08032900  |
| Cl | -4.91813900 | 1.61281000  | 0.13305200  |



Current Data Parameters  
 NAME YXL-8-149-H-141104  
 EXPNO 10  
 PROCNO 1

F2 - Acquisition Parameters  
 Date\_ 20141104  
 Time 13.45  
 INSTRUM spect  
 PROBHD 5 mm PABBO BB/  
 PULPROG zg30  
 TD 65536  
 SOLVENT CDCl3  
 NS 14  
 DS 2  
 SWH 8012.820 Hz  
 FIDRES 0.122266 Hz  
 AQ 4.0894465 sec  
 RG 32.58  
 DW 62.400 usec  
 DE 6.50 usec  
 TE 297.0 K  
 D1 1.00000000 sec  
 TD0 1

==== CHANNEL f1 =====  
 SF01 400.1324710 MHz  
 NUC1 1H  
 P1 8.78 usec  
 PLW1 19.00000000 W

F2 - Processing parameters  
 SI 65536  
 SF 400.1300092 MHz  
 WDW EM  
 SSB 0  
 LB 0.30 Hz  
 GB 0  
 PC 1.00

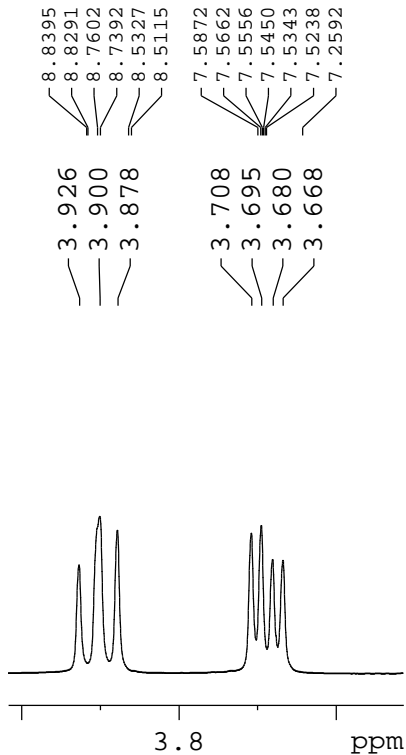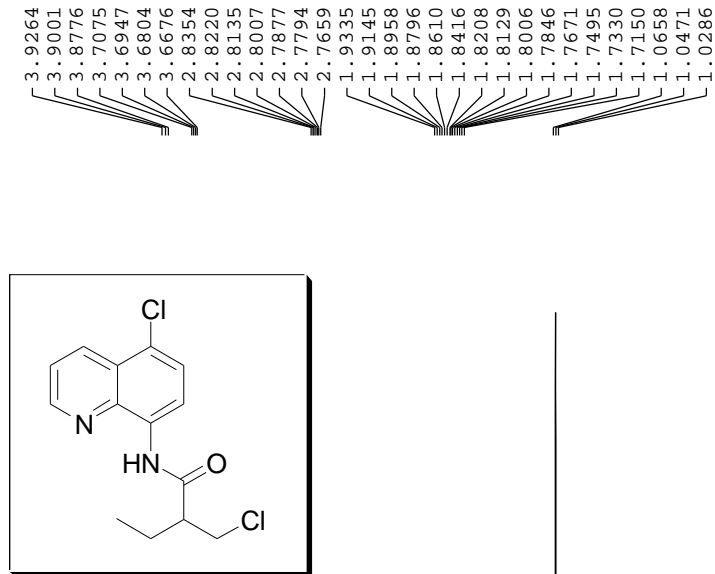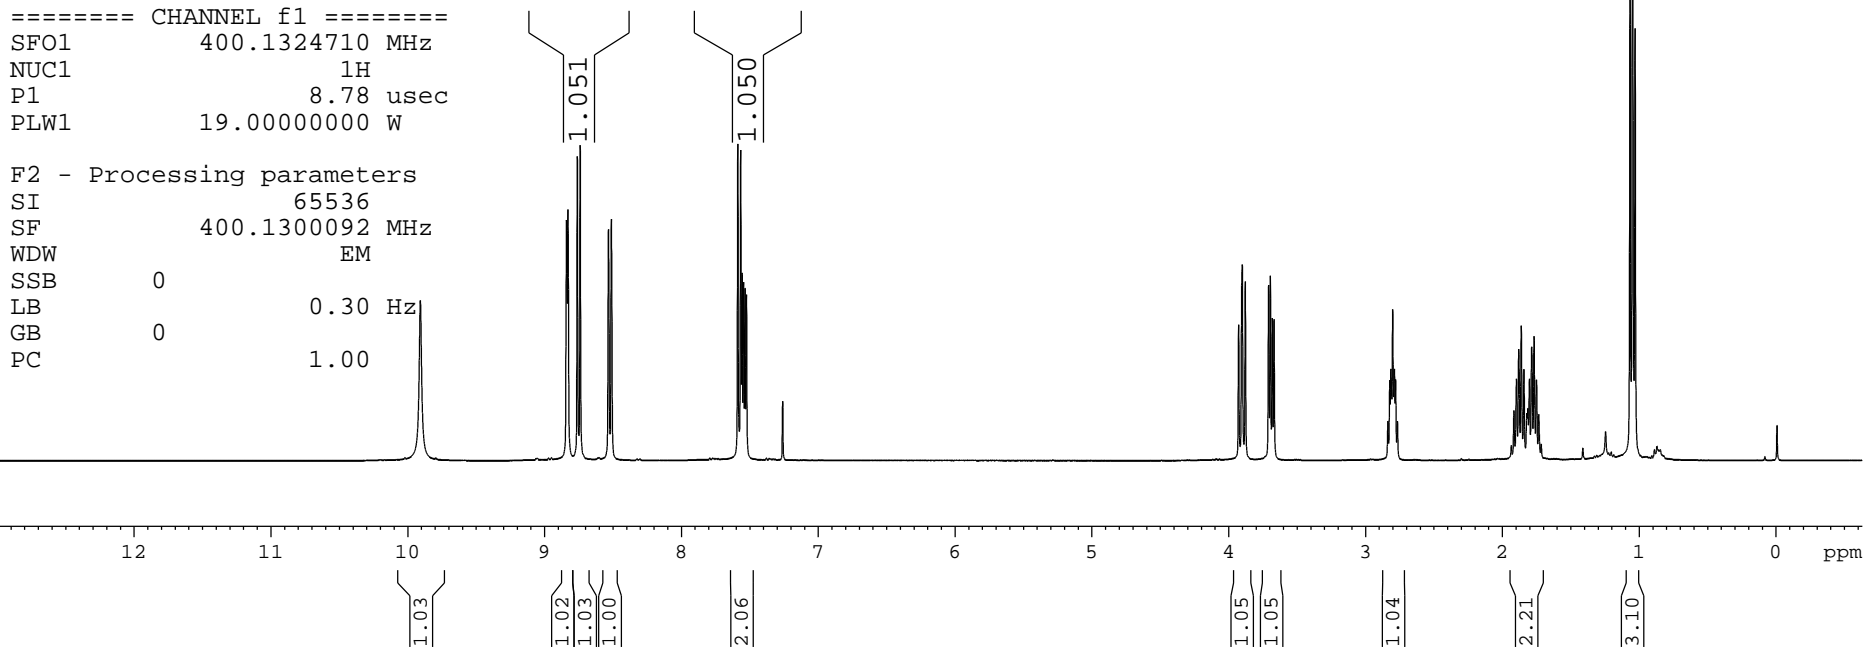

Current Data Parameters  
NAME YXL-8-149-C-141104  
EXPNO 10  
PROCNO 1

F2 - Acquisition Parameters  
Date\_ 20141104  
Time 13.50  
INSTRUM spect  
PROBHD 5 mm PABBO BB/  
PULPROG zgpg30  
TD 65536  
SOLVENT CDCl3  
NS 123  
DS 4  
SWH 24038.461 Hz  
FIDRES 0.366798 Hz  
AQ 1.3631488 sec  
RG 202.1  
DW 20.800 usec  
DE 6.50 usec  
TE 297.0 K  
D1 2.0000000 sec  
D11 0.03000000 sec  
TD0 1

==== CHANNEL f1 =====  
SFO1 100.6228293 MHz  
NUC1 13C  
P1 9.85 usec  
PLW1 65.00000000 W

==== CHANNEL f2 =====  
SFO2 400.1316005 MHz  
NUC2 1H  
CPDPRG[2] waltz16  
PCPD2 90.00 usec  
PLW2 19.00000000 W  
PLW12 0.18082000 W  
PLW13 0.14647000 W

F2 - Processing parameters  
SI 32768  
SF 100.6127599 MHz  
WDW EM  
SSB 0  
LB 1.00 Hz  
GB 0  
PC 1.40

— 171.45  
— 148.85  
— 139.01  
— 133.44  
— 127.23  
— 125.97  
— 124.73  
— 122.47  
— 116.71

77.48  
77.16  
76.84  
— 53.19  
— 44.99  
— 24.35  
— 11.76

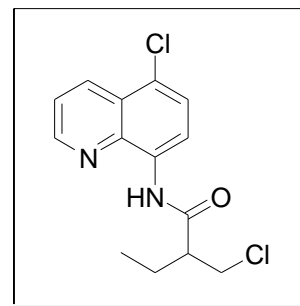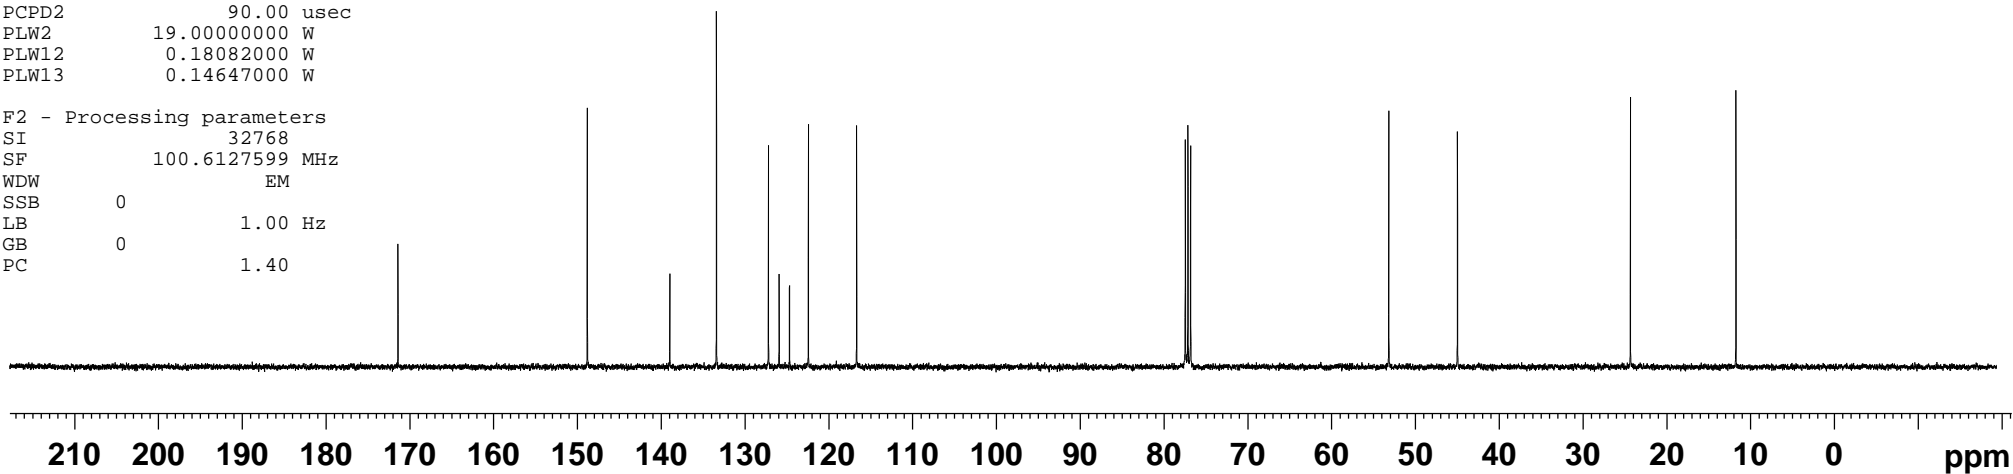

Current Data Parameters  
NAME YXL-9-4-H-20150101  
EXPNO 20  
PROCNO 1

F2 - Acquisition Parameters  
Date\_ 20150101  
Time 22.26  
INSTRUM spect  
PROBHD 5 mm PABBO BB-  
PULPROG zg30  
TD 65536  
SOLVENT CDCl3  
NS 16  
DS 2  
SWH 8223.685 Hz  
FIDRES 0.125483 Hz  
AQ 3.9846387 sec  
RG 130.81  
DW 60.800 usec  
DE 6.50 usec  
TE 297.0 K  
D1 1.00000000 sec  
TD0 1

===== CHANNEL f1 =====  
NUC1 1H  
P1 14.83 usec  
PLW1 13.00199986 W  
SFO1 400.1324710 MHz

F2 - Processing parameters  
SI 65536  
SF 400.1300100 MHz  
WDW EM  
SSB 0  
LB 0.30 Hz  
GB 0  
PC 1.00

9.8446

8.8436  
8.8405  
8.8334  
8.7189  
8.6980  
8.5638  
8.5425

7.5962  
7.5798  
7.5751  
7.5594  
7.5488  
7.2599

3.9690  
3.9526  
3.9364

3.0461  
3.0298  
3.0135

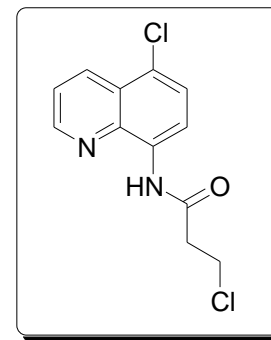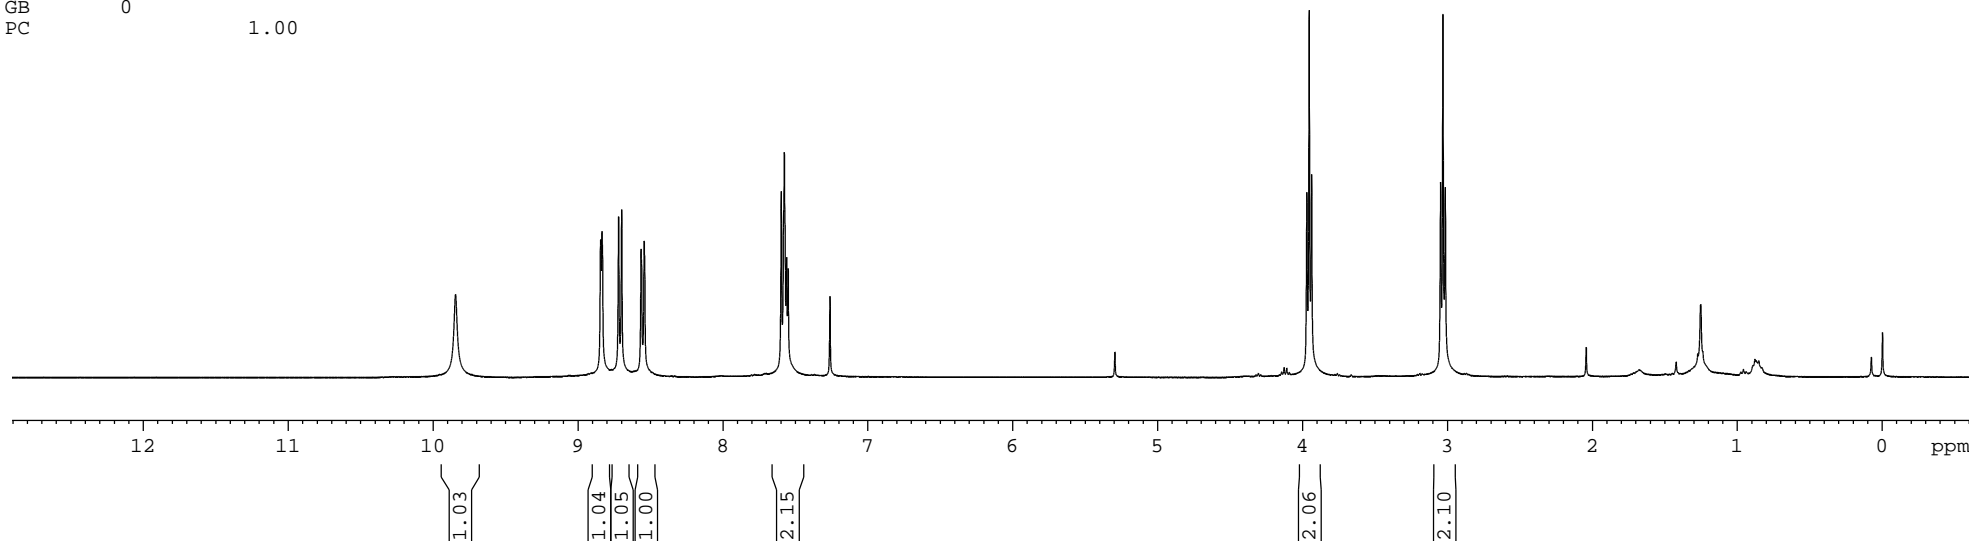

Current Data Parameters  
NAME YXL-9-4-C-20150102  
EXPNO 10  
PROCNO 1

F2 - Acquisition Parameters  
Date\_ 20150103  
Time 0.33  
INSTRUM spect  
PROBHD 5 mm PABBO BB-  
PULPROG zgpg30  
TD 65536  
SOLVENT CDC13  
NS 490  
DS 4  
SWH 24038.461 Hz  
FIDRES 0.366798 Hz  
AQ 1.3631988 sec  
RG 63.51  
DW 20.800 usec  
DE 6.50 usec  
TE 298.3 K  
D1 2.00000000 sec  
D11 0.03000000 sec  
TD0 1

==== CHANNEL f1 =====  
NUC1 13C  
P1 10.59 usec  
PLW1 50.00299835 W  
SFO1 100.6228293 MHz

==== CHANNEL f2 =====  
CPDPRG2 waltz16  
NUC2 1H  
PCPD2 90.00 usec  
PLW2 13.00199986 W  
PLW12 0.35303000 W  
PLW13 0.28595001 W  
SFO2 400.1316005 MHz

F2 - Processing parameters  
SI 32768  
SF 100.6127571 MHz  
WDW EM  
SSB 0  
LB 1.00 Hz  
GB 0  
PC 1.40

168.06

148.84

138.92

133.55

133.47

127.30

126.03

124.79

122.53

116.72

77.47

77.16

76.84

40.98

39.76

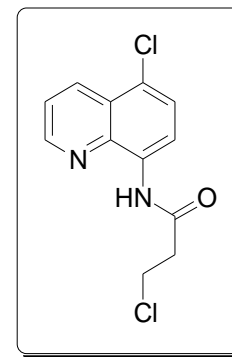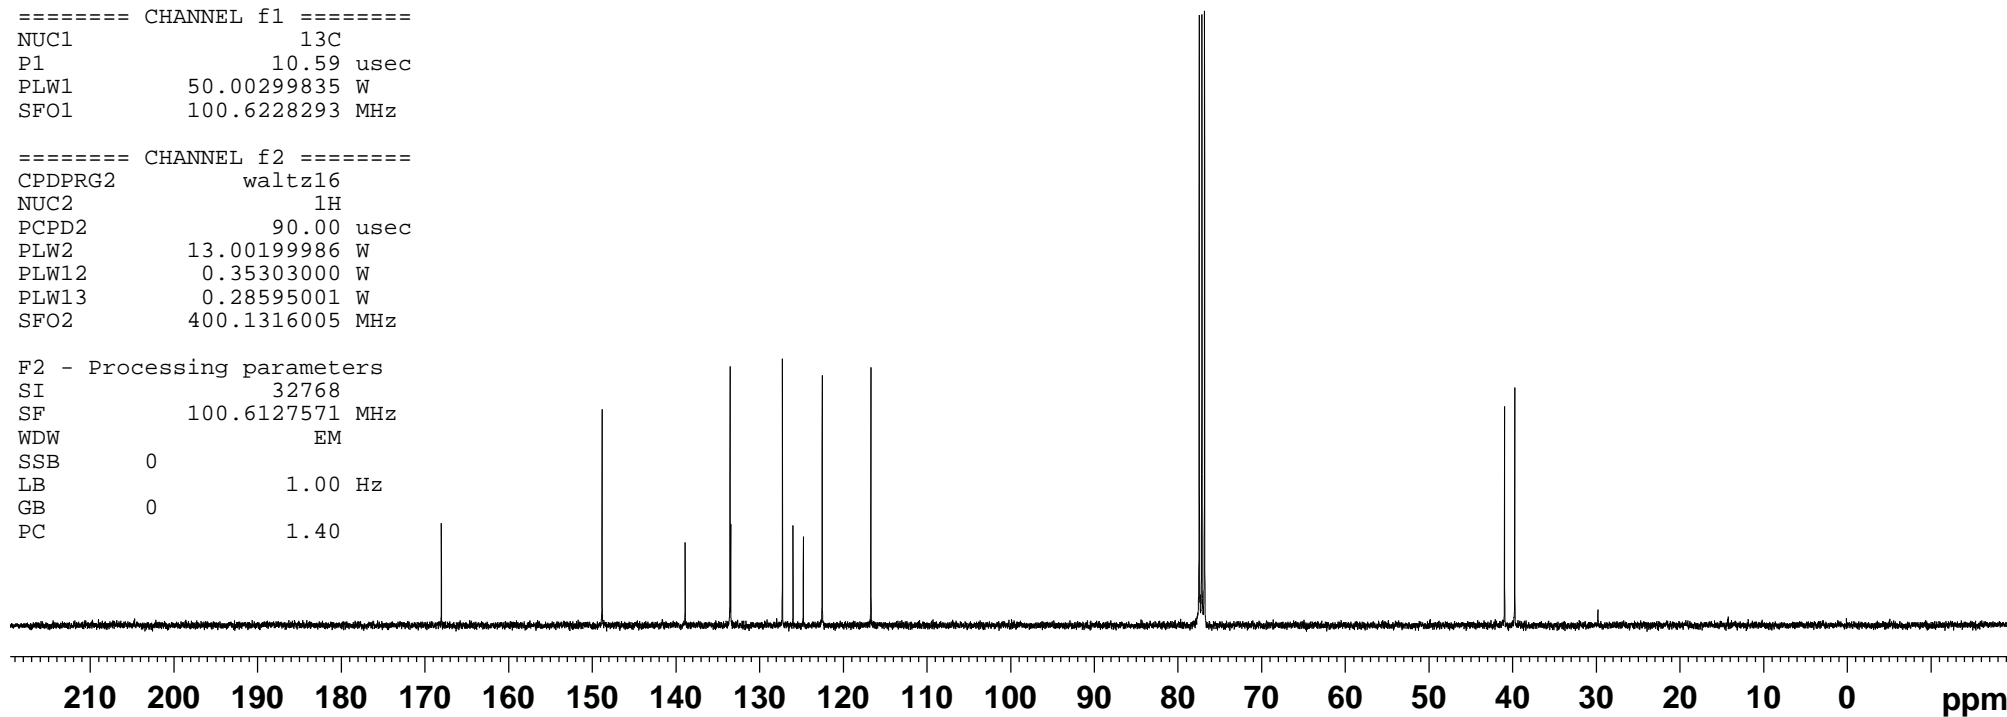

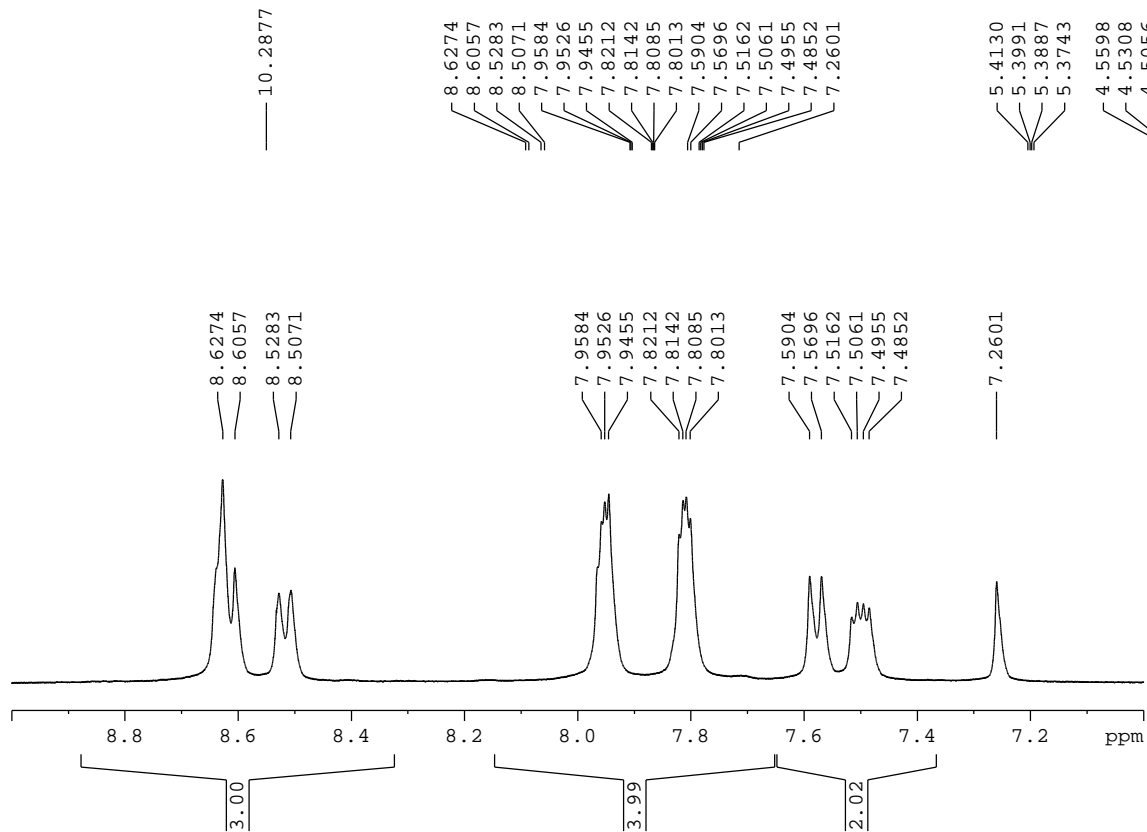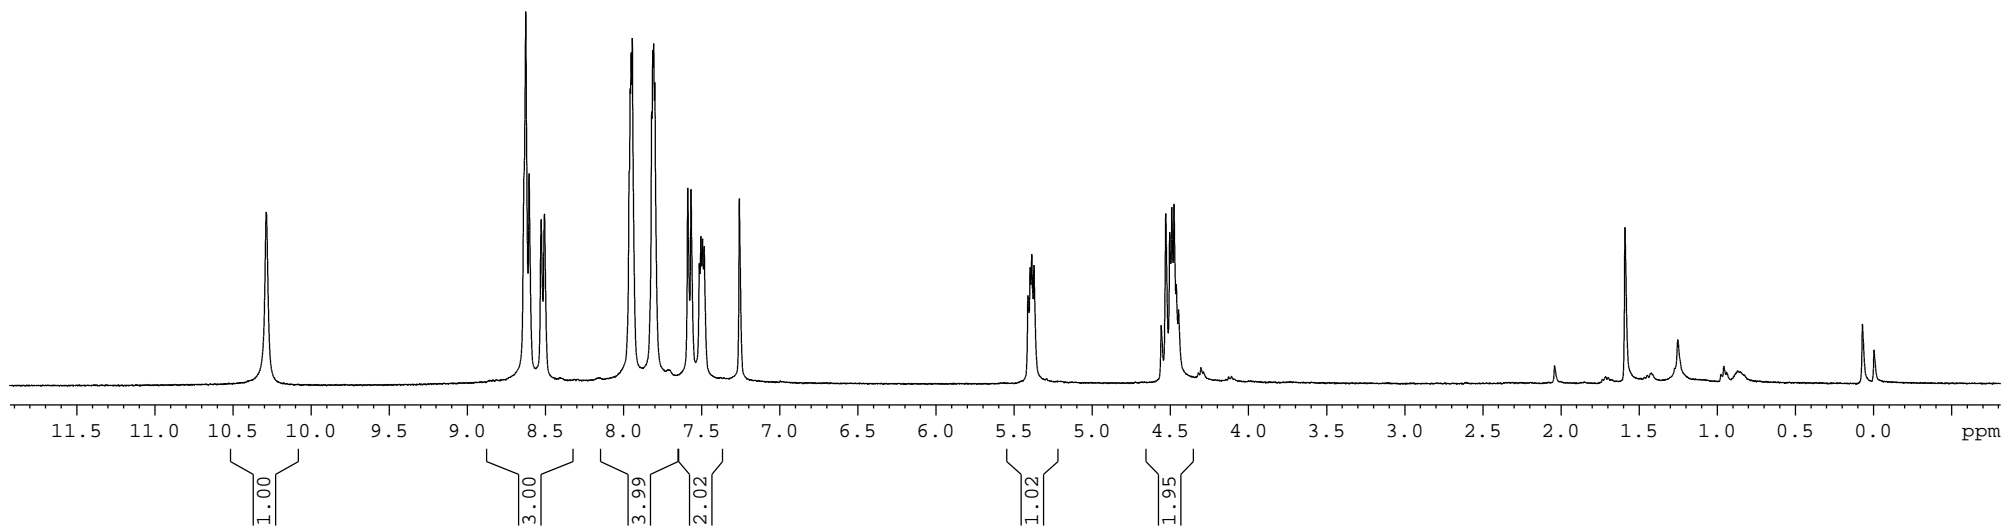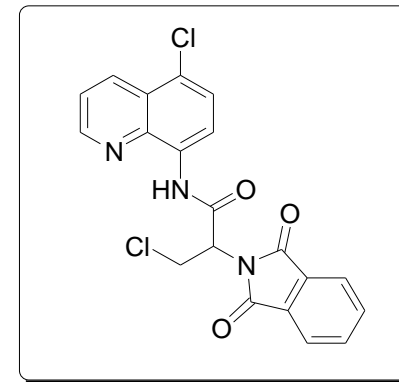

Current Data Parameters  
 NAME syh-9-229-1-p  
 EXPNO 10  
 PROCNO 1

F2 - Acquisition Parameters  
 Date\_ 20160304  
 Time 22.03  
 INSTRUM spect  
 PROBHD 5 mm PABBO BB-  
 PULPROG zg30  
 TD 65536  
 SOLVENT CDCl3  
 NS 16  
 DS 2  
 SWH 8223.685 Hz  
 FIDRES 0.125483 Hz  
 AQ 3.9846387 sec  
 RG 165.63  
 DW 60.800 usec  
 DE 6.50 usec  
 TE 298.8 K  
 D1 1.00000000 sec  
 TD0 1

==== CHANNEL f1 =====  
 NUC1 1H  
 P1 14.80 usec  
 PLW1 13.00199986 W  
 SFO1 400.1324710 MHz

F2 - Processing parameters  
 SI 65536  
 SF 400.1300092 MHz  
 WDW EM  
 SSB 0  
 LB 0.30 Hz  
 GB 0  
 PC 1.00

Current Data Parameters  
NAME zx-1-138-c-141023-  
EXPNO 10  
PROCNO 1

F2 - Acquisition Parameters  
Date\_ 20141024  
Time 7.40  
INSTRUM spect  
PROBHD 5 mm PABBO BB/  
PULPROG zgpg30  
TD 65536  
SOLVENT CDC13  
NS 480  
DS 4  
SWH 24038.461 Hz  
FIDRES 0.366798 Hz  
AQ 1.3631488 sec  
RG 202.1  
DW 20.800 usec  
DE 6.50 usec  
TE 297.0 K  
D1 2.00000000 sec  
D11 0.03000000 sec  
TD0 1

==== CHANNEL f1 =====  
SFO1 100.6228293 MHz  
NUC1 13C  
P1 9.85 usec  
PLW1 65.00000000 W

==== CHANNEL f2 =====  
SFO2 400.1316005 MHz  
NUC2 1H  
CPDPRG[2] waltz16  
PCPD2 90.00 usec  
PLW2 19.00000000 W  
PLW12 0.18082000 W  
PLW13 0.14647000 W

F2 - Processing parameters  
SI 32768  
SF 100.6127570 MHz  
WDW EM  
SSB 0  
LB 1.00 Hz  
GB 0  
PC 1.40

167.68  
164.44  
149.08  
139.02  
134.77  
133.51  
132.76  
131.67  
127.15  
125.99  
125.42  
124.11  
122.57  
116.94  
77.48  
77.16  
76.84  
56.24  
41.16

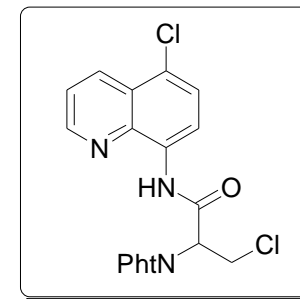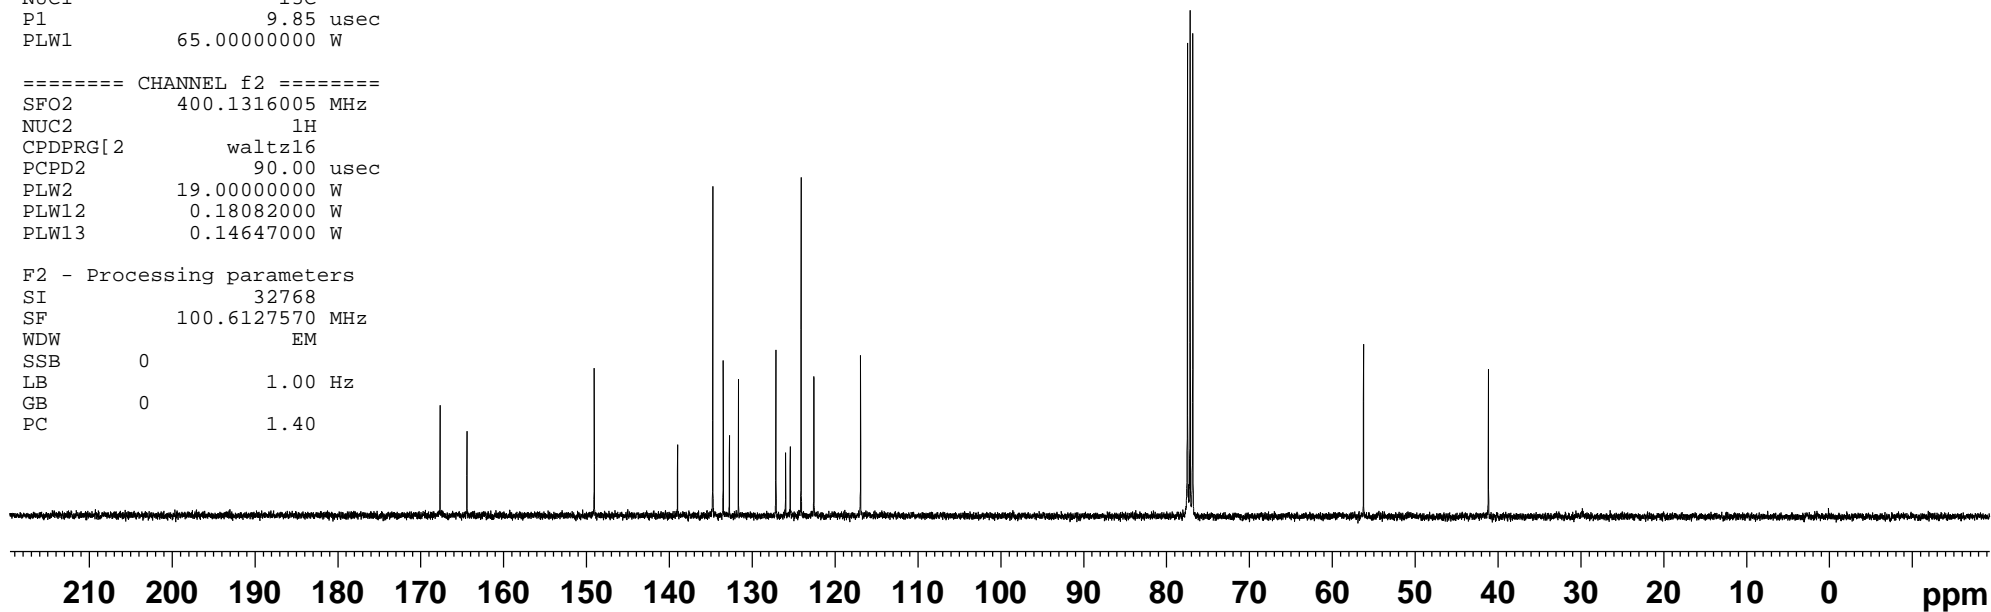

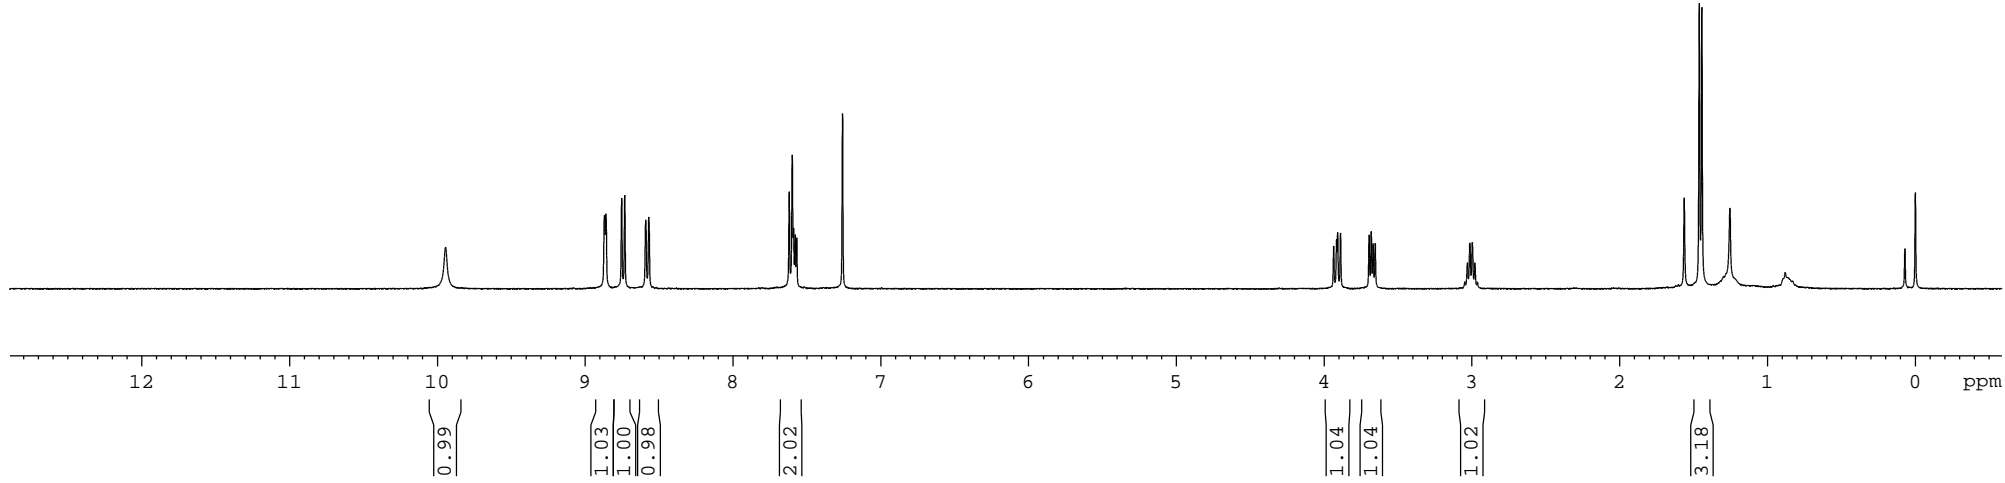

— 9.9467

8.8717  
8.8615  
8.7548  
8.7337  
8.5924  
8.5712

7.6205  
7.6004  
7.5914  
7.5803  
7.5699  
7.2597

3.9359  
3.9163  
3.9090  
3.8895  
3.6960  
3.6817  
3.6690  
3.6547  
3.0145  
2.9977

1.4616  
1.4443

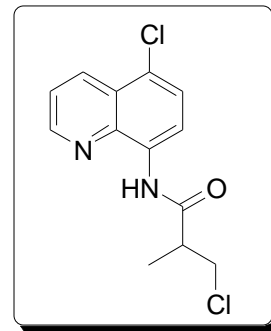

— 171.91  
 — 148.91  
 — 139.14  
 — 133.61  
 — 127.35  
 — 126.10  
 — 124.82  
 — 122.55  
 — 116.79

Current Data Parameters  
 NAME zx-1-196-2-c-20141204-  
 EXPNO 20  
 PROCNO 1

F2 - Acquisition Parameters  
 Date\_ 20141204  
 Time 23.15  
 INSTRUM spect  
 PROBHD 5 mm PABBO BB-  
 PULPROG zgpg30  
 TD 65536  
 SOLVENT CDC13  
 NS 470  
 DS 4  
 SWH 24038.461 Hz  
 FIDRES 0.366798 Hz  
 AQ 1.3631988 sec  
 RG 209.25  
 DW 20.800 usec  
 DE 6.50 usec  
 TE 298.1 K  
 D1 2.00000000 sec  
 D11 0.03000000 sec  
 TD0 1

===== CHANNEL f1 =====  
 NUC1 13C  
 P1 10.59 usec  
 PLW1 50.00299835 W  
 SFO1 100.6228293 MHz

===== CHANNEL f2 =====  
 CPDPRG2 waltz16  
 NUC2 1H  
 PCPD2 90.00 usec  
 PLW2 13.00199986 W  
 PLW12 0.35303000 W  
 PLW13 0.28595001 W  
 SFO2 400.1316005 MHz

F2 - Processing parameters  
 SI 32768  
 SF 100.6127548 MHz  
 WDW EM  
 SSB 0  
 LB 1.00 Hz  
 GB 0  
 PC 1.40

— 46.49  
 — 45.65

— 16.35

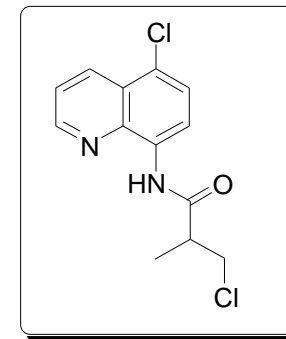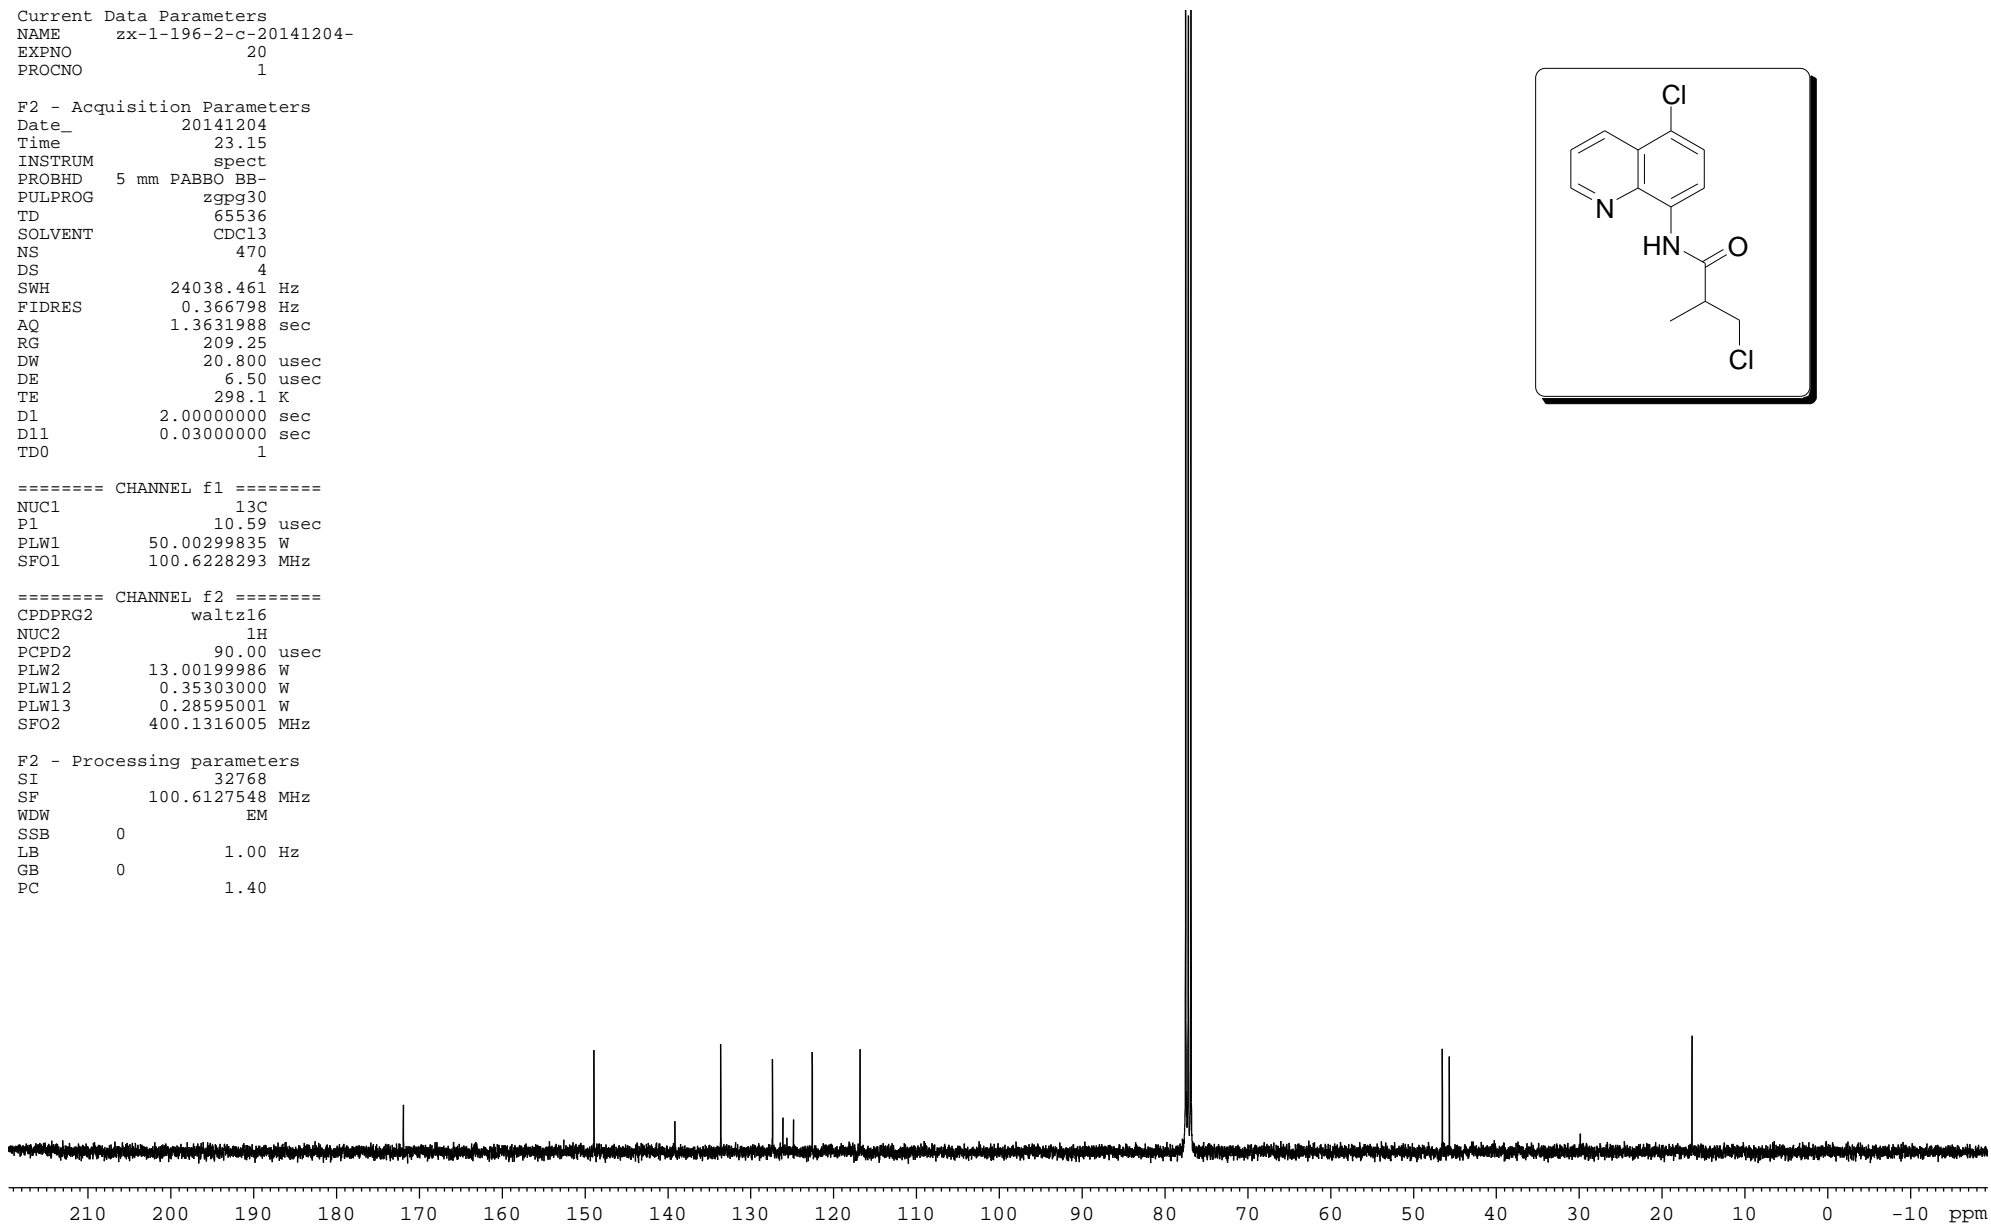

210 200 190 180 170 160 150 140 130 120 110 100 90 80 70 60 50 40 30 20 10 0 -10 ppm



Current Data Parameters  
 NAME zx-1-196-1-h-20141204-  
 EXPNO 20  
 PROCNO 1

F2 - Acquisition Parameters  
 Date\_ 20141204  
 Time 20.05  
 INSTRUM spect  
 PROBHD 5 mm PABBO BB-  
 PULPROG zg30  
 TD 65536  
 SOLVENT CDCl3  
 NS 16  
 DS 2  
 SWH 8223.685 Hz  
 FIDRES 0.125483 Hz  
 AQ 3.9846387 sec  
 RG 184.16  
 DW 60.800 usec  
 DE 6.50 usec  
 TE 297.2 K  
 D1 1.0000000 sec  
 TD0 1

==== CHANNEL f1 =====  
 NUC1 1H  
 P1 14.83 usec  
 PLW1 13.00199986 W  
 SFO1 400.1324710 MHz

F2 - Processing parameters  
 SI 65536  
 SF 400.1300100 MHz  
 WDW EM  
 SSB 0  
 LB 0.30 Hz  
 GB 0  
 PC 1.00

10.0619

8.8818  
8.8784  
8.8714  
8.8679  
8.7266  
8.7056  
8.5946  
8.5910  
8.5733  
8.5698  
7.6235  
7.6113  
7.6022  
7.5901  
7.5795  
7.2600

3.997  
3.979  
3.969  
3.951  
3.902  
3.887  
3.874  
3.858

3.298  
3.282  
3.265  
3.249  
3.231

3.9971  
3.9790  
3.9690  
3.9509  
3.9021  
3.8866  
3.8740  
3.8585  
3.2980  
3.2821  
3.2646  
3.2487  
3.2311

1.5864  
1.2536

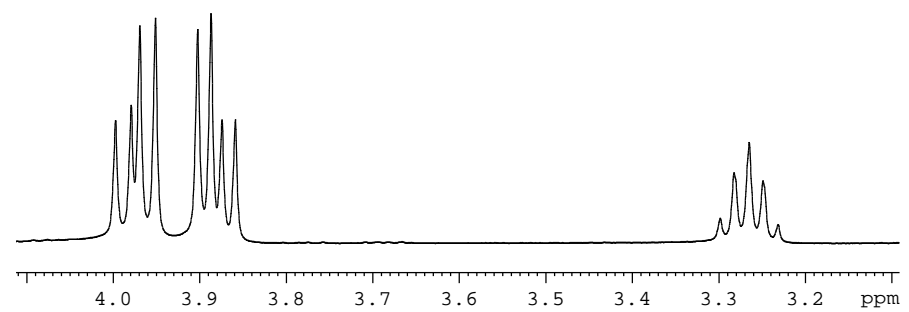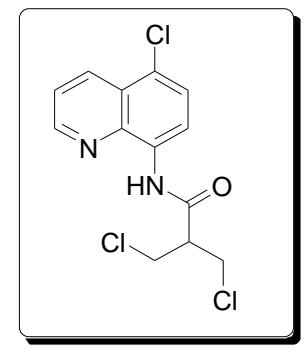

2.136  
2.032  
1.016

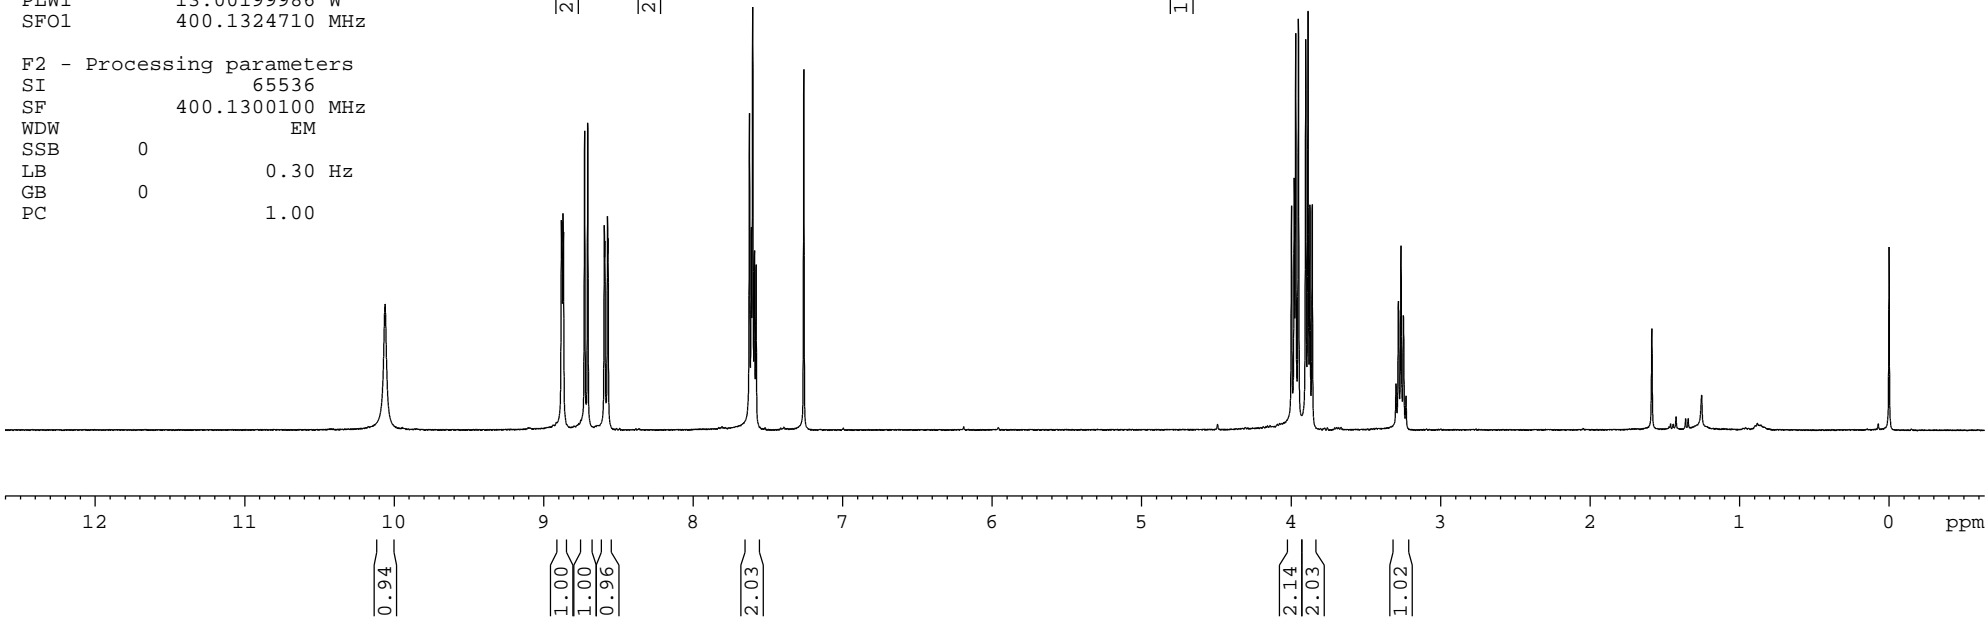

Current Data Parameters  
NAME zx-1-196-1-c-20141204-  
EXPNO 30  
PROCNO 1

F2 - Acquisition Parameters  
Date\_ 20141204  
Time 22.44  
INSTRUM spect  
PROBHD 5 mm PABBO BB-  
PULPROG zgpg30  
TD 65536  
SOLVENT CDCl3  
NS 440  
DS 4  
SWH 24038.461 Hz  
FIDRES 0.366798 Hz  
AQ 1.3631988 sec  
RG 209.25  
DW 20.800 usec  
DE 6.50 usec  
TE 298.1 K  
D1 2.0000000 sec  
D11 0.0300000 sec  
TD0 1

==== CHANNEL f1 =====  
NUC1 13C  
P1 10.59 usec  
PLW1 50.00299835 W  
SFO1 100.6228293 MHz

==== CHANNEL f2 =====  
CPDPRG2 waltz16  
NUC2 1H  
PCPD2 90.00 usec  
PLW2 13.00199986 W  
PLW12 0.35303000 W  
PLW13 0.28595001 W  
SFO2 400.1316005 MHz

F2 - Processing parameters  
SI 32768  
SF 100.6127553 MHz  
WDW EM  
SSB 0  
LB 1.00 Hz  
GB 0  
PC 1.40

168.14  
149.06  
139.08  
133.64  
133.14  
127.26  
126.11  
125.34  
122.67  
117.01

53.31  
42.77

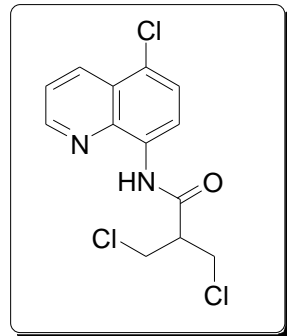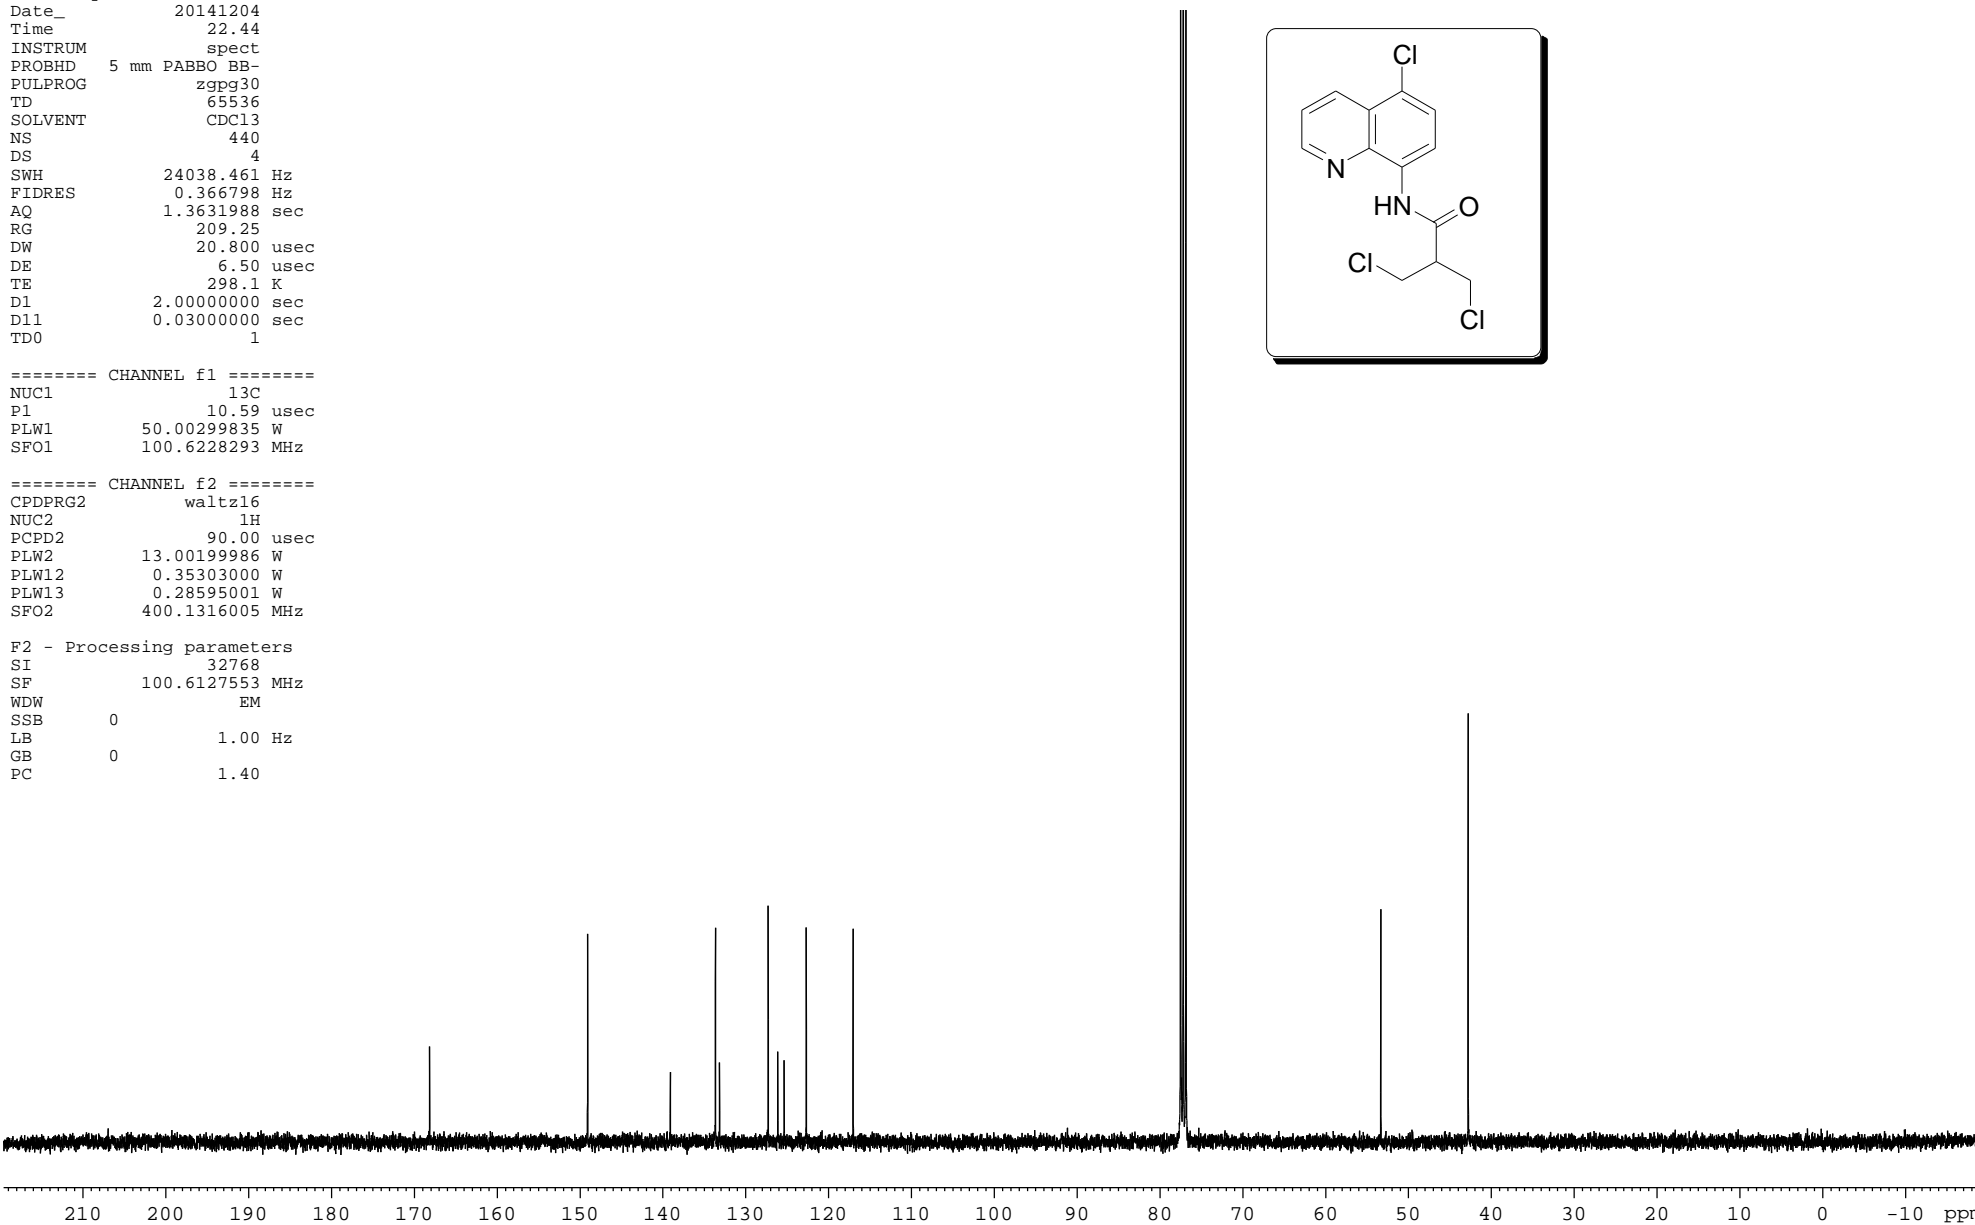

Current Data Parameters  
 NAME YXL-8-140-1-H-141105  
 EXPNO 10  
 PROCNO 1

F2 - Acquisition Parameters  
 Date\_ 20141105  
 Time 13.13  
 INSTRUM spect  
 PROBHD 5 mm PABBO BB/  
 PULPROG zg30  
 TD 65536  
 SOLVENT CDCl3  
 NS 16  
 DS 2  
 SWH 8012.820 Hz  
 FIDRES 0.122266 Hz  
 AQ 4.0894465 sec  
 RG 73.55  
 DW 62.400 usec  
 DE 6.50 usec  
 TE 297.0 K  
 D1 1.00000000 sec  
 TDO 1

==== CHANNEL f1 =====  
 SFO1 400.1324710 MHz  
 NUC1 1H  
 P1 8.78 usec  
 PLW1 19.00000000 W

F2 - Processing parameters  
 SI 65536  
 SF 400.1300099 MHz  
 WDW EM  
 SSB 0  
 LB 0.30 Hz  
 GB 0  
 PC 1.00

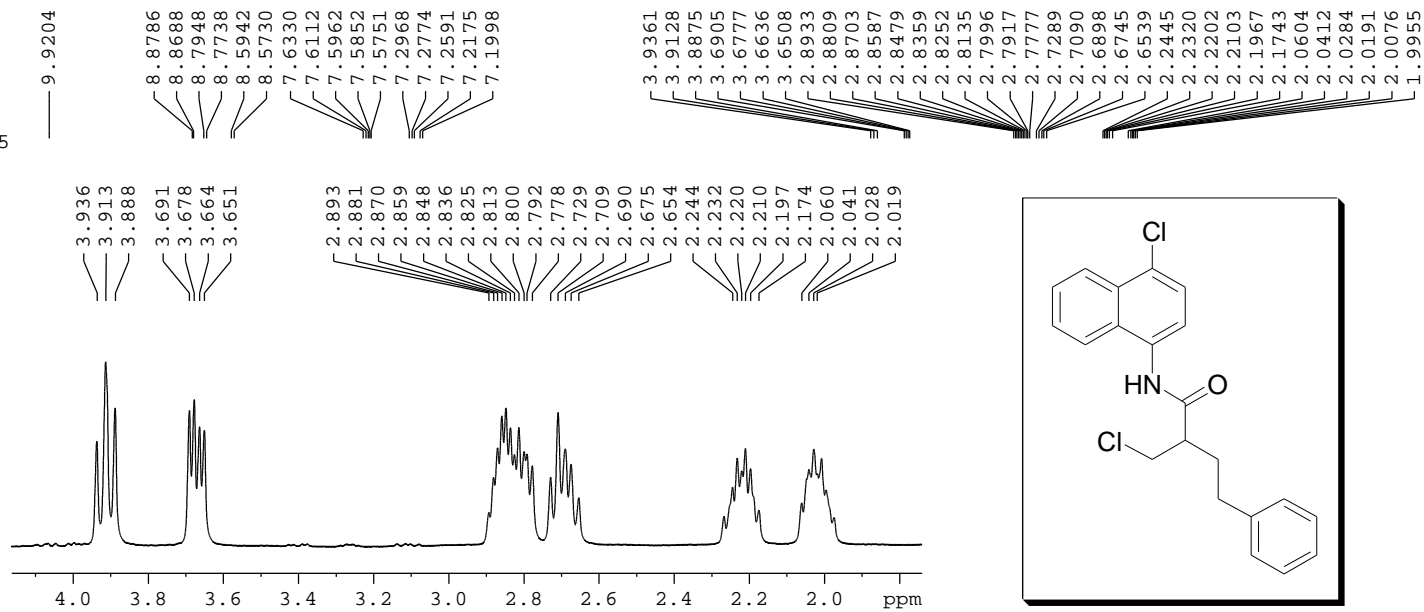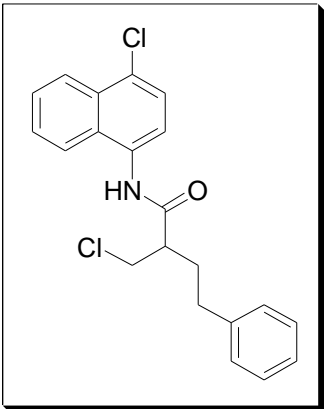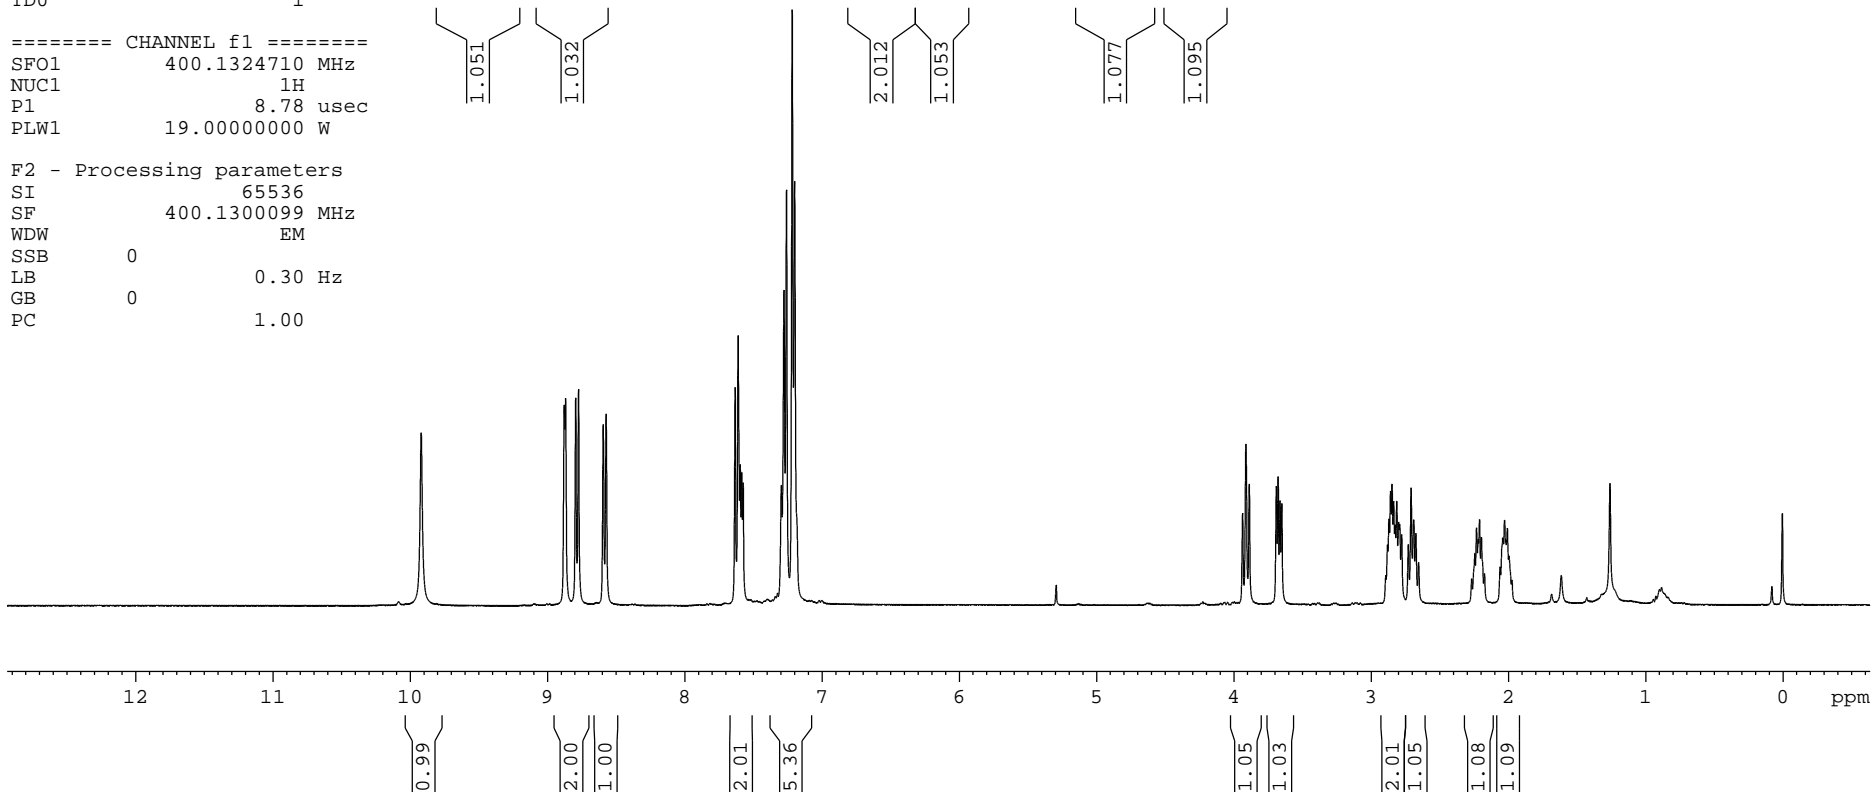

Current Data Parameters  
NAME YXL-8-140-1-C-141105  
EXPNO 10  
PROCNO 1

F2 - Acquisition Parameters  
Date\_ 20141106  
Time 1.08  
INSTRUM spect  
PROBHD 5 mm PABBO BB/  
PULPROG zgpg30  
TD 65536  
SOLVENT CDCl3  
NS 470  
DS 4  
SWH 24038.461 Hz  
FIDRES 0.366798 Hz  
AQ 1.3631488 sec  
RG 202.1  
DW 20.800 usec  
DE 6.50 usec  
TE 297.0 K  
D1 2.00000000 sec  
D11 0.03000000 sec  
TD0 1

=====  
SFO1 100.6228293 MHz  
NUC1 13C  
P1 9.85 usec  
PLW1 65.00000000 W

=====  
SFO2 400.1316005 MHz  
NUC2 1H  
CPDPRG[2] waltz16  
PCPD2 90.00 usec  
PLW2 19.00000000 W  
PLW12 0.18082000 W  
PLW13 0.14647000 W

F2 - Processing parameters  
SI 32768  
SF 100.6127571 MHz  
WDW EM  
SSB 0  
LB 1.00 Hz  
GB 0  
PC 1.40

171.22

148.91  
140.77  
139.11  
133.56  
133.42  
128.71  
128.60  
127.32  
126.39  
126.09  
124.92  
122.57  
116.87

77.48  
77.16  
76.84

50.91  
45.38

33.32  
32.63

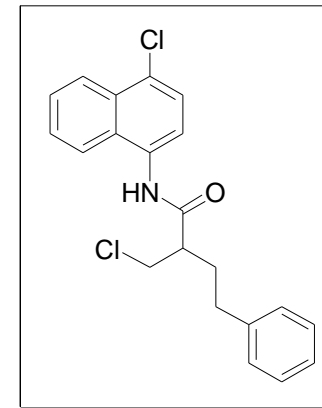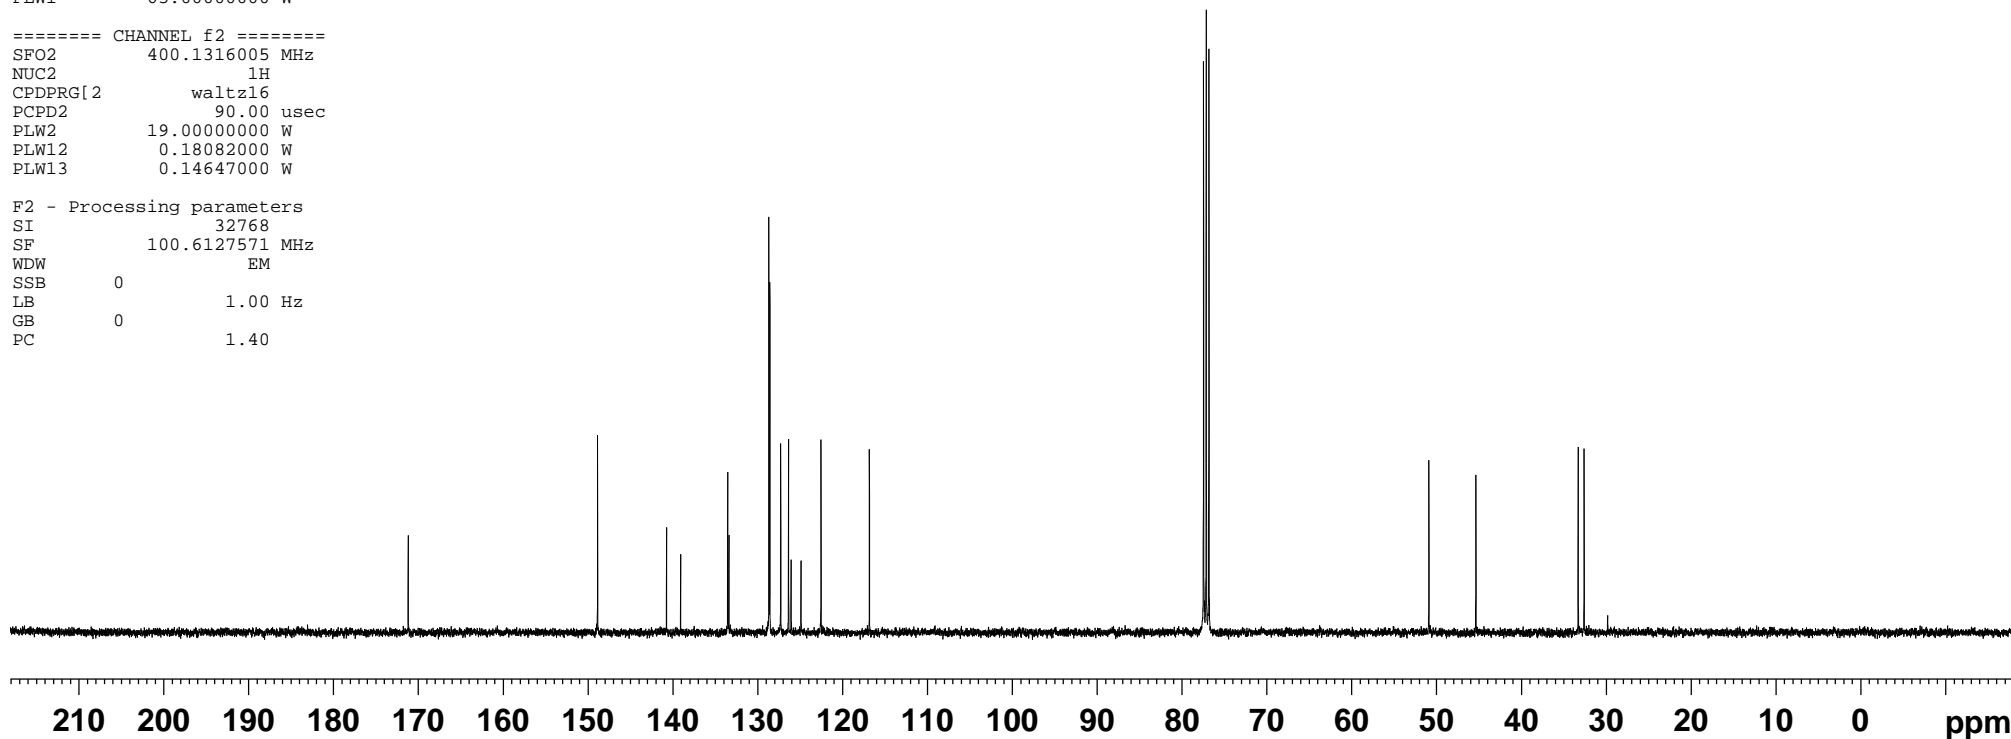

Current Data Parameters  
 NAME YXL-8-115-H-141031  
 EXPNO 10  
 PROCNO 1

F2 - Acquisition Parameters  
 Date\_ 20141031  
 Time 9.51  
 INSTRUM spect  
 PROBHD 5 mm PABBO BB/  
 PULPROG zg30  
 TD 65536  
 SOLVENT CDCl3  
 NS 16  
 DS 2  
 SWH 8012.820 Hz  
 FIDRES 0.122266 Hz  
 AQ 4.0894465 sec  
 RG 89.81  
 DW 62.400 usec  
 DE 6.50 usec  
 TE 297.0 K  
 D1 1.00000000 sec  
 TD0 1

==== CHANNEL f1 =====  
 SFO1 400.1324710 MHz  
 NUC1 1H  
 P1 8.78 usec  
 PLW1 19.00000000 W

F2 - Processing parameters  
 SI 65536  
 SF 400.1300089 MHz  
 WDW EM  
 SSB 0  
 LB 0.30 Hz  
 GB 0  
 PC 1.00

8.7992  
8.7953  
8.7891  
8.7133  
8.6923  
8.5485  
8.5272  
7.5917  
7.5704  
7.4533  
7.4353  
7.4326  
7.3754  
7.3579  
7.2578

4.3303  
4.3082  
4.2819  
4.0886  
4.0723  
4.0522  
3.8221  
3.8064  
3.7952  
3.7800

1.5974  
1.2561

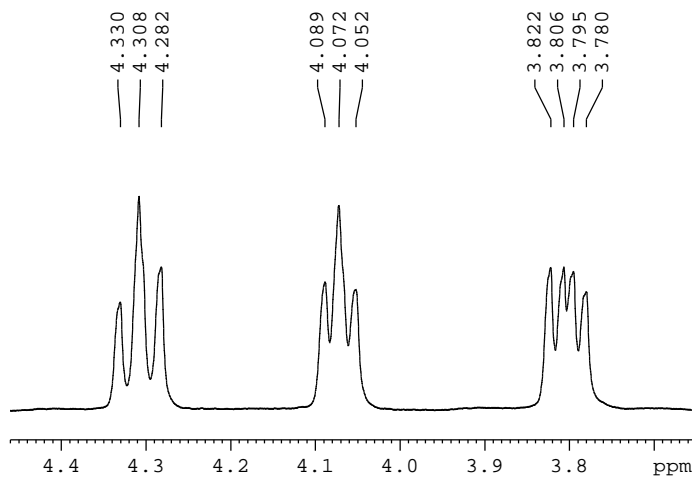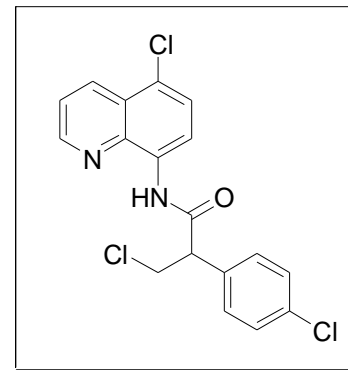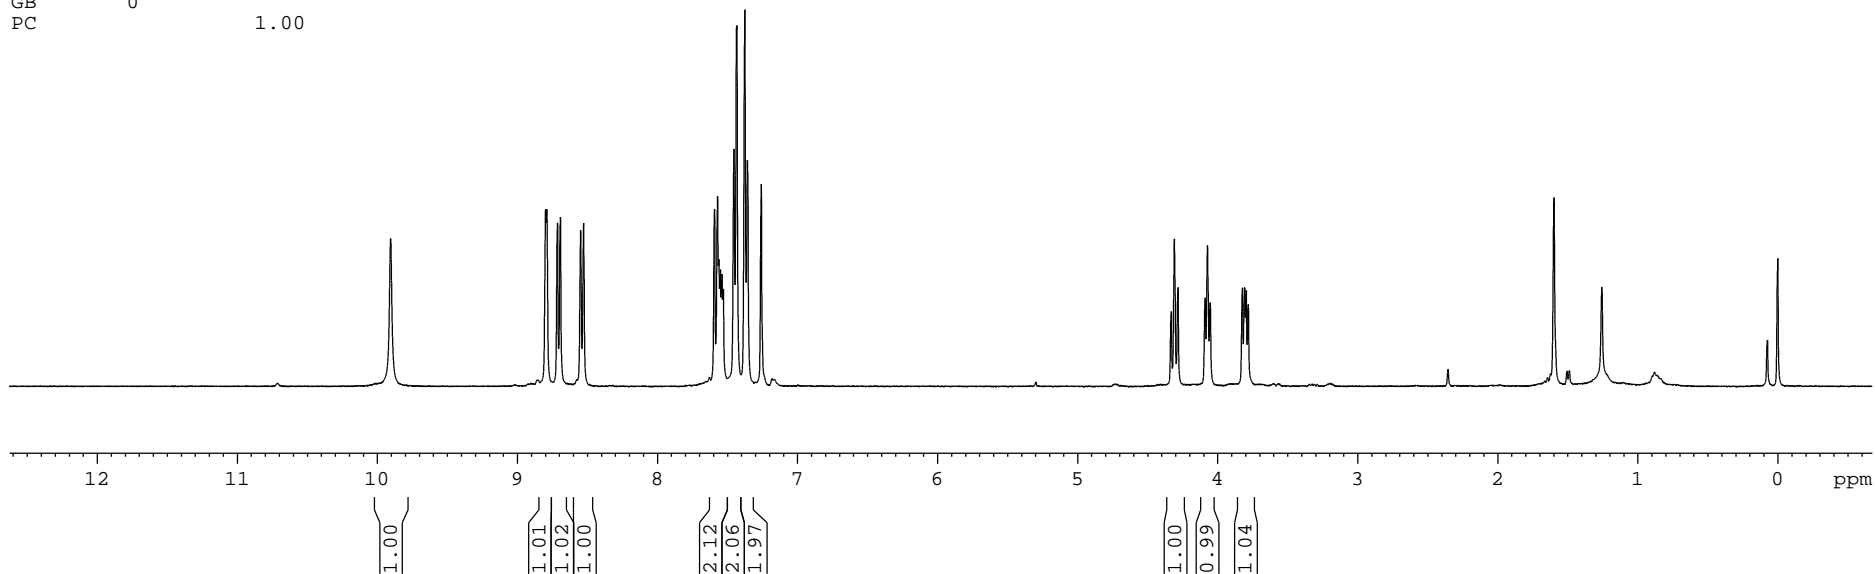



Current Data Parameters  
 NAME YXL-9-166-CL-H-20150307  
 EXPNO 30  
 PROCNO 1

F2 - Acquisition Parameters  
 Date\_ 20150307  
 Time 21.12  
 INSTRUM spect  
 PROBHD 5 mm PABBO BB-  
 PULPROG zg30  
 TD 65536  
 SOLVENT CDCl3  
 NS 12  
 DS 2  
 SWH 8223.685 Hz  
 FIDRES 0.125483 Hz  
 AQ 3.9846387 sec  
 RG 63.51  
 DW 60.800 usec  
 DE 6.50 usec  
 TE 0 K  
 D1 1.0000000 sec  
 TD0 1

==== CHANNEL f1 =====  
 NUC1 1H  
 P1 14.83 usec  
 PLW1 13.00199986 W  
 SFO1 400.1324710 MHz

F2 - Processing parameters  
 SI 65536  
 SF 400.1300098 MHz  
 WDW EM  
 SSB 0  
 LB 0.30 Hz  
 GB 0  
 PC 1.00

9.9121

8.8561  
 8.8464  
 8.7675  
 8.7466  
 8.5554  
 8.5342

7.6014  
 7.5803  
 7.5723  
 7.5615  
 7.5507  
 7.5403  
 7.2594

3.9227  
 3.8990  
 3.8965  
 3.8737  
 3.6956  
 3.6831  
 3.6687  
 3.6561  
 2.8753  
 2.8659  
 2.8536  
 2.8415  
 2.8320  
 1.8727  
 1.8548  
 1.8371  
 1.8202  
 1.7995  
 1.7191  
 1.7063  
 1.6880  
 1.6705  
 1.3933  
 1.3834  
 1.3464  
 1.2505  
 0.9025  
 0.8848  
 0.8660

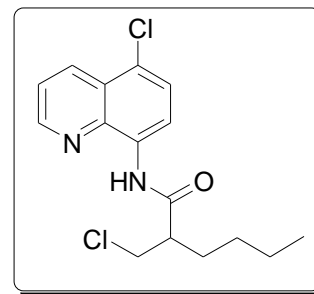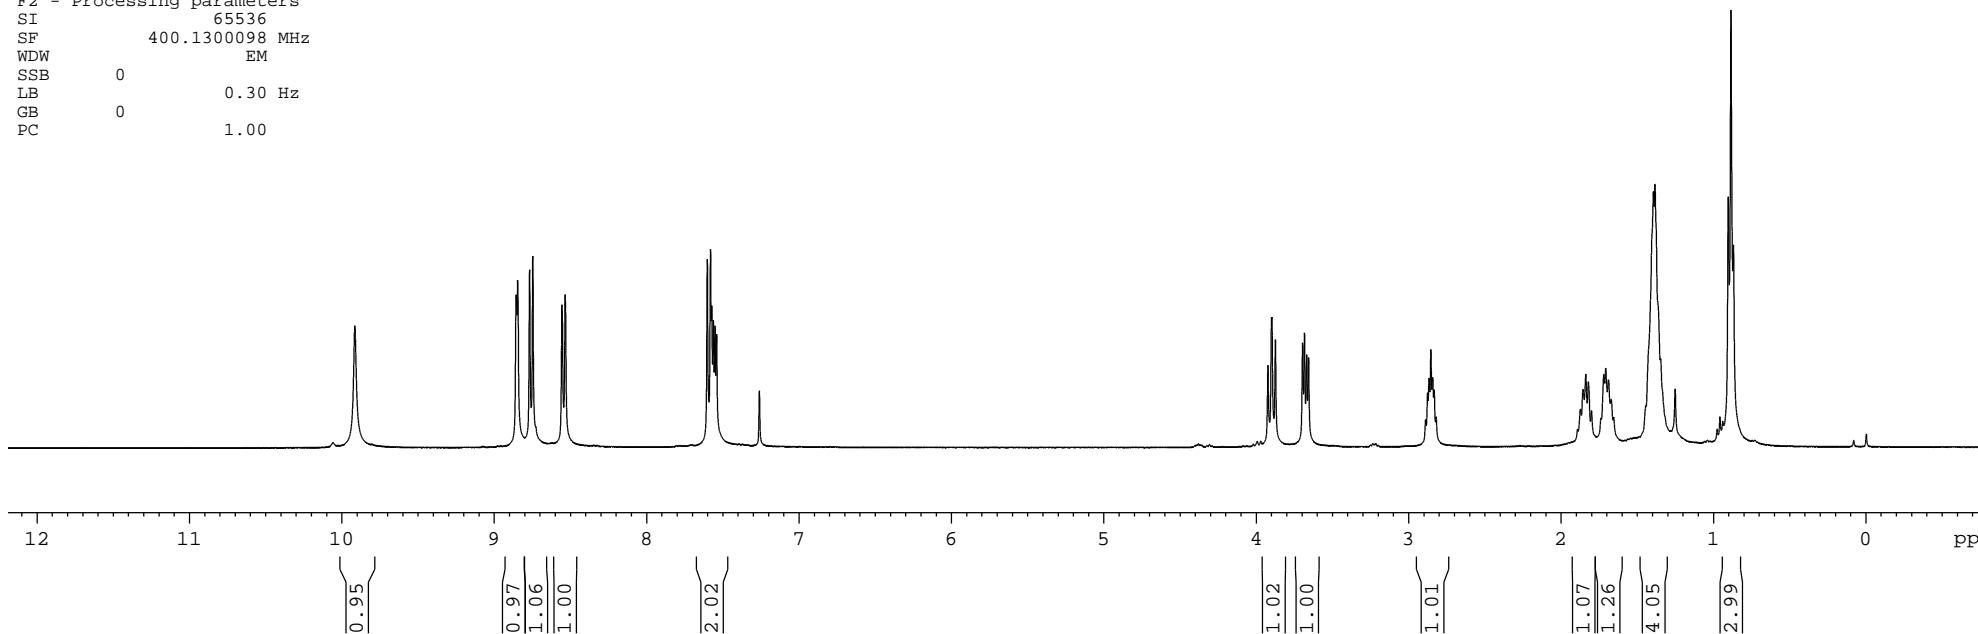

— 171.59

— 148.85

— 139.06

— 133.46

— 127.25

— 126.01

— 124.73

— 122.46

— 116.74

— 77.45

— 77.13

— 76.81

— 51.79

— 45.32

— 30.89

— 29.39

— 22.71

— 13.90

Current Data Parameters  
NAME YXL-9-166-CL-C-20150307  
EXPNO 32  
PROCNO 1

F2 - Acquisition Parameters  
Date\_ 20150308  
Time 10.47  
INSTRUM spect  
PROBHD 5 mm PABBO BB-  
PULPROG zgpg30  
TD 65536  
SOLVENT CDCl3  
NS 300  
DS 4  
SWH 24038.461 Hz  
FIDRES 0.366798 Hz  
AQ 1.3631988 sec  
RG 209.25  
DW 20.800 usec  
DE 6.50 usec  
TE 0 K  
D1 2.00000000 sec  
D11 0.03000000 sec  
TD0 1

==== CHANNEL f1 =====  
NUC1 13C  
P1 10.59 usec  
PLW1 50.00299835 W  
SFO1 100.6228293 MHz

==== CHANNEL f2 =====  
CPDPRG2 waltz16  
NUC2 1H  
PCPD2 90.00 usec  
PLW2 13.00199986 W  
PLW12 0.35303000 W  
PLW13 0.28595001 W  
SFO2 400.1316005 MHz

F2 - Processing parameters  
SI 32768  
SF 100.6127597 MHz  
WDW EM  
SSB 0  
LB 1.00 Hz  
GB 0  
PC 1.40

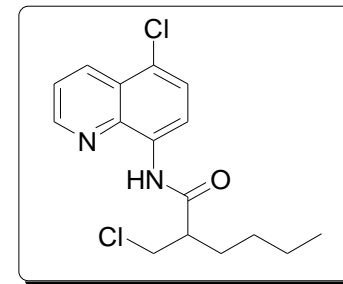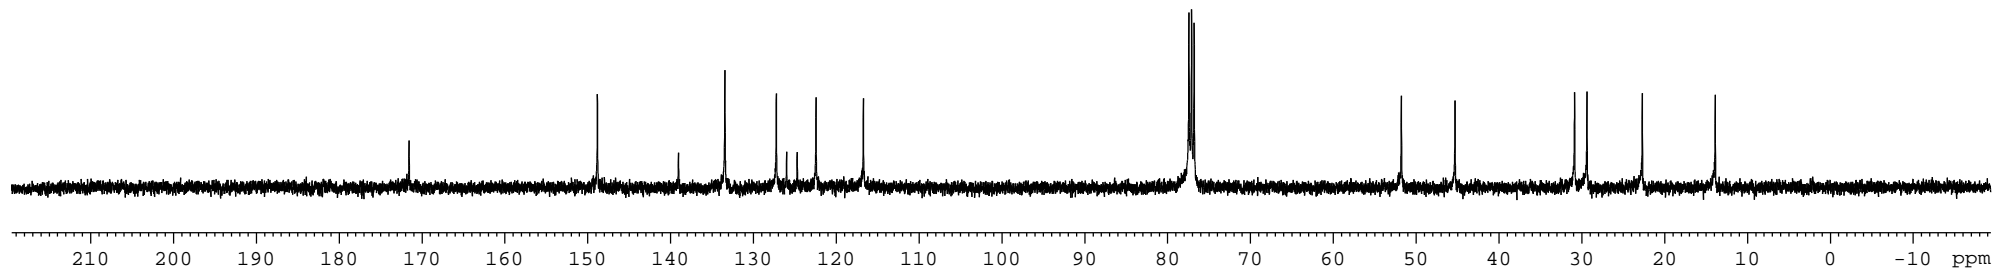



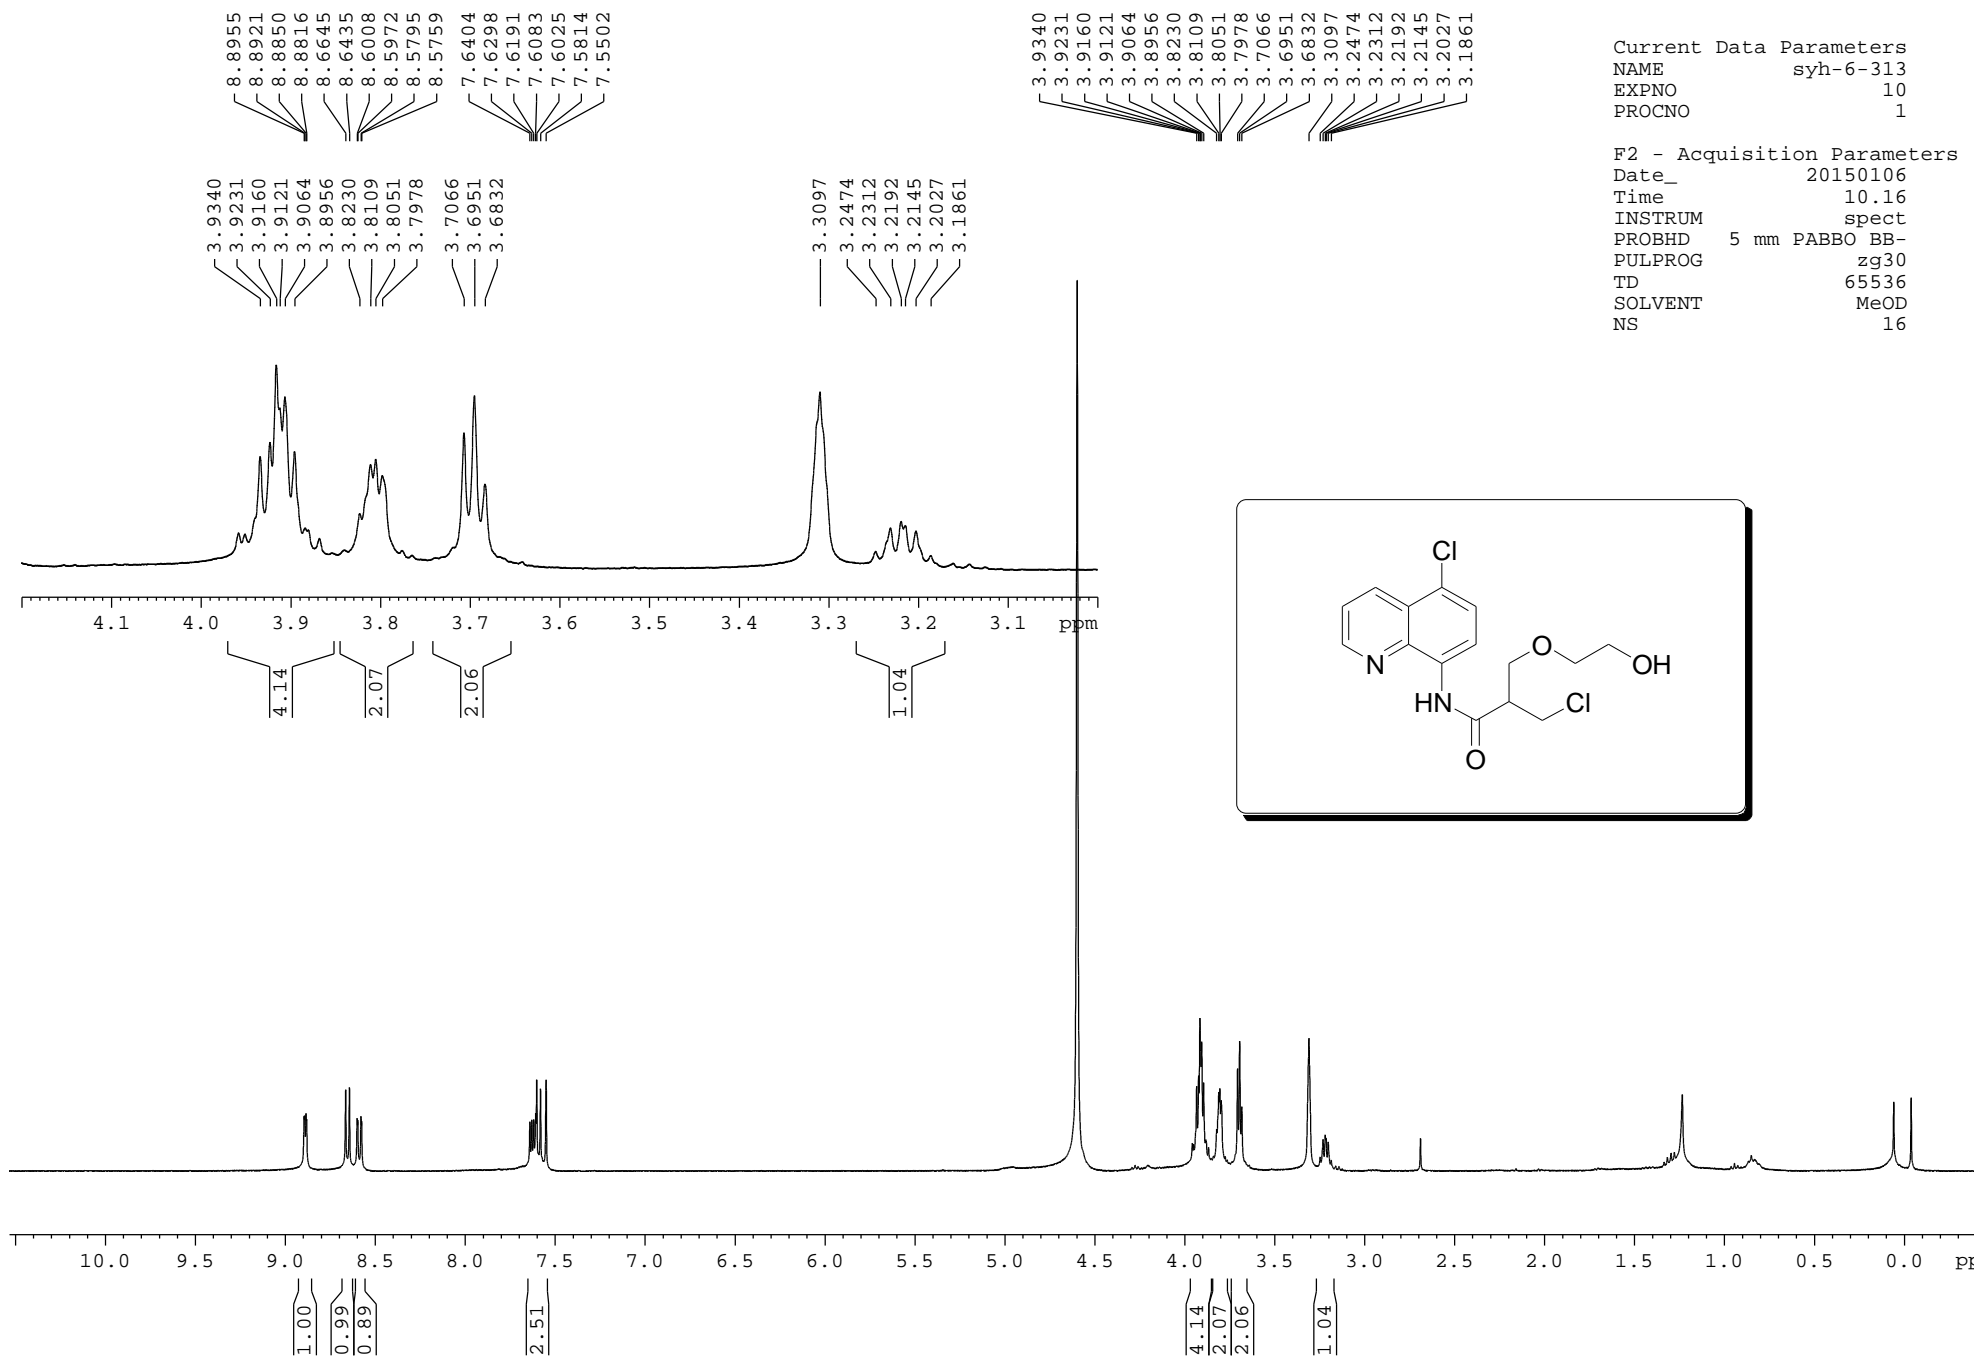

Current Data Parameters  
 NAME syh-6-313  
 EXPNO 10  
 PROCNO 1

F2 - Acquisition Parameters  
 Date\_ 20150106  
 Time 10.16  
 INSTRUM spect  
 PROBHD 5 mm PABBO BB-  
 PULPROG zg30  
 TD 65536  
 SOLVENT MeOD  
 NS 16

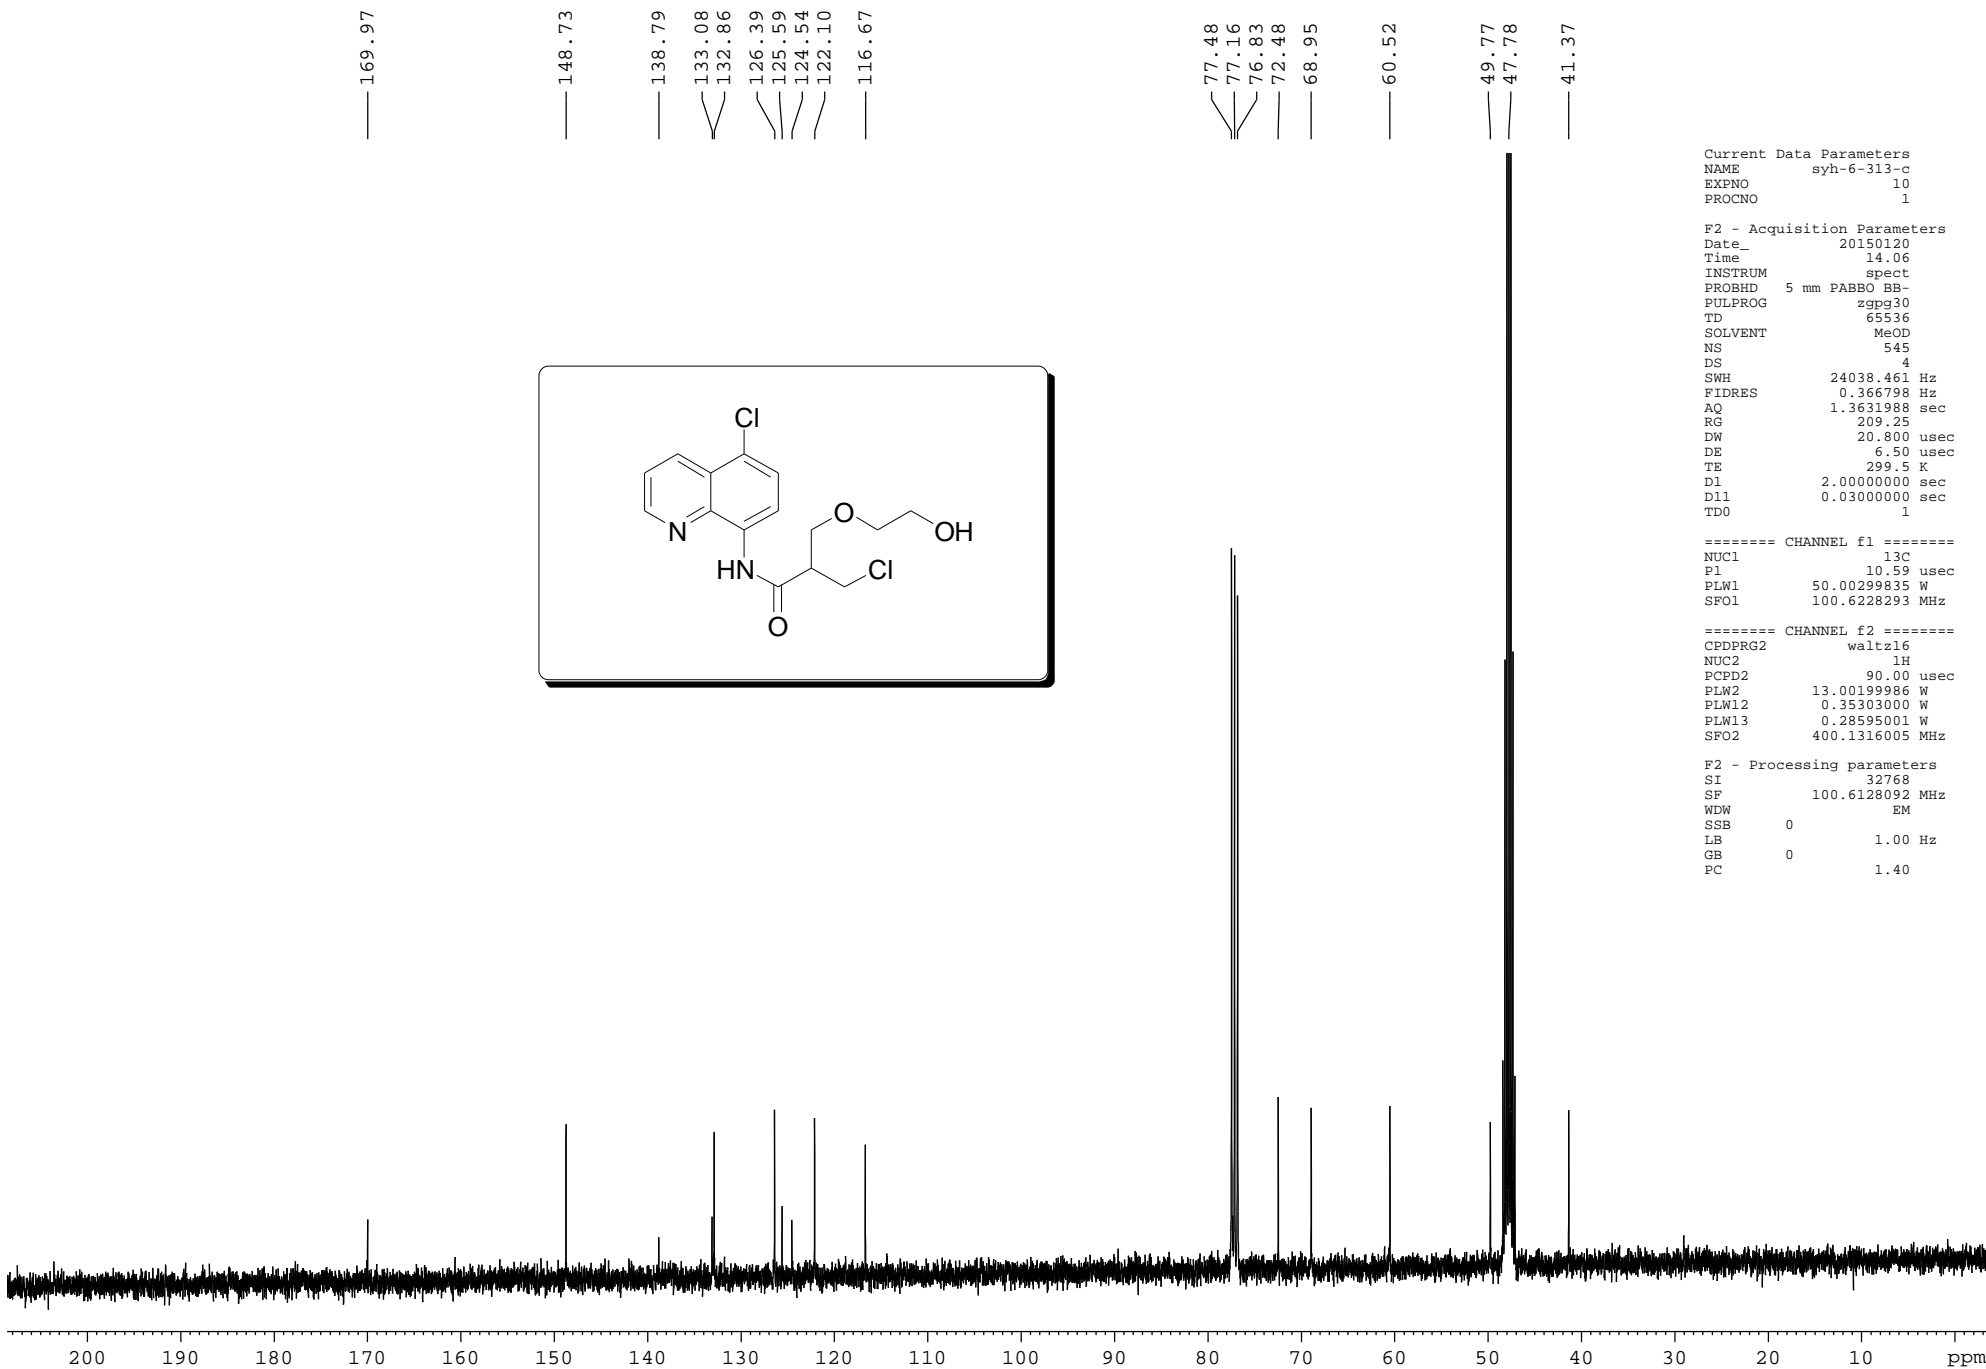

Current Data Parameters  
 NAME syh-6-313-c  
 EXPNO 10  
 PROCNO 1

F2 - Acquisition Parameters  
 Date\_ 20150120  
 Time 14.06  
 INSTRUM spect  
 PROBHD 5 mm PABBO BB-  
 PULPROG zgpg30  
 TD 65536  
 SOLVENT MeOD  
 NS 545  
 DS 4  
 SWH 24038.461 Hz  
 FIDRES 0.366798 Hz  
 AQ 1.3631988 sec  
 RG 209.25  
 DW 20.800 usec  
 DE 6.50 usec  
 TE 299.5 K  
 D1 2.0000000 sec  
 D11 0.0300000 sec  
 TDO 1

===== CHANNEL f1 =====  
 NUC1 13C  
 P1 10.59 usec  
 PLW1 50.00299835 W  
 SFO1 100.6228293 MHz

===== CHANNEL f2 =====  
 CPDPRG2 waltz16  
 NUC2 1H  
 PCPD2 90.00 usec  
 PLW2 13.00199986 W  
 PLW12 0.35303000 W  
 PLW13 0.28595001 W  
 SPO2 400.1316005 MHz

F2 - Processing parameters  
 SI 32768  
 SF 100.6128092 MHz  
 WDW EM  
 SSB 0  
 LB 1.00 Hz  
 GB 0  
 PC 1.40

Current Data Parameters  
 NAME 20150421-zx-2-a-h  
 EXPNO 10  
 PROCNO 1

F2 - Acquisition Parameters  
 Date\_ 20150421  
 Time 17.02  
 INSTRUM spect  
 PROBHD 5 mm PABBO BB-  
 PULPROG zg30  
 TD 65536  
 SOLVENT CDCl3  
 NS 16  
 DS 2  
 SWH 8223.685 Hz  
 FIDRES 0.125483 Hz  
 AQ 3.9846387 sec  
 RG 130.81  
 DW 60.800 usec  
 DE 6.50 usec  
 TE 301.3 K  
 D1 1.00000000 sec  
 TD0 1

==== CHANNEL f1 =====  
 NUC1 1H  
 P1 14.83 usec  
 PLW1 13.0019986 W  
 SFO1 400.1324710 MHz

F2 - Processing parameters  
 SI 65536  
 SF 400.1300123 MHz  
 WDW EM  
 SSB 0  
 LB 0.30 Hz  
 GB 0  
 PC 1.00

9.7343  
 8.7741  
 8.7708  
 8.7638  
 8.7259  
 8.7049  
 8.5392  
 8.5359  
 8.5180  
 8.5147  
 7.5914  
 7.5704  
 7.5443  
 7.5338  
 7.5231  
 7.5126  
 7.2506  
 7.2409  
 7.1727  
 7.1643  
 7.1604  
 7.1513  
 7.1452

3.9354  
 3.9158  
 3.9082  
 3.8999  
 3.8886  
 3.7258  
 3.7145  
 3.6986  
 3.6872  
 3.1721  
 3.1465  
 3.1332  
 3.1209  
 3.1146  
 3.0702  
 3.0585  
 3.0430

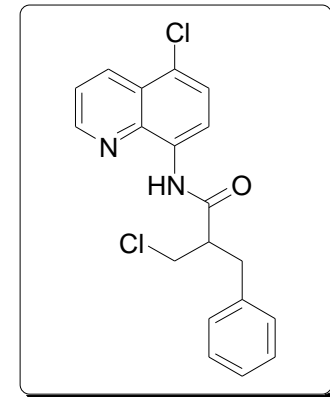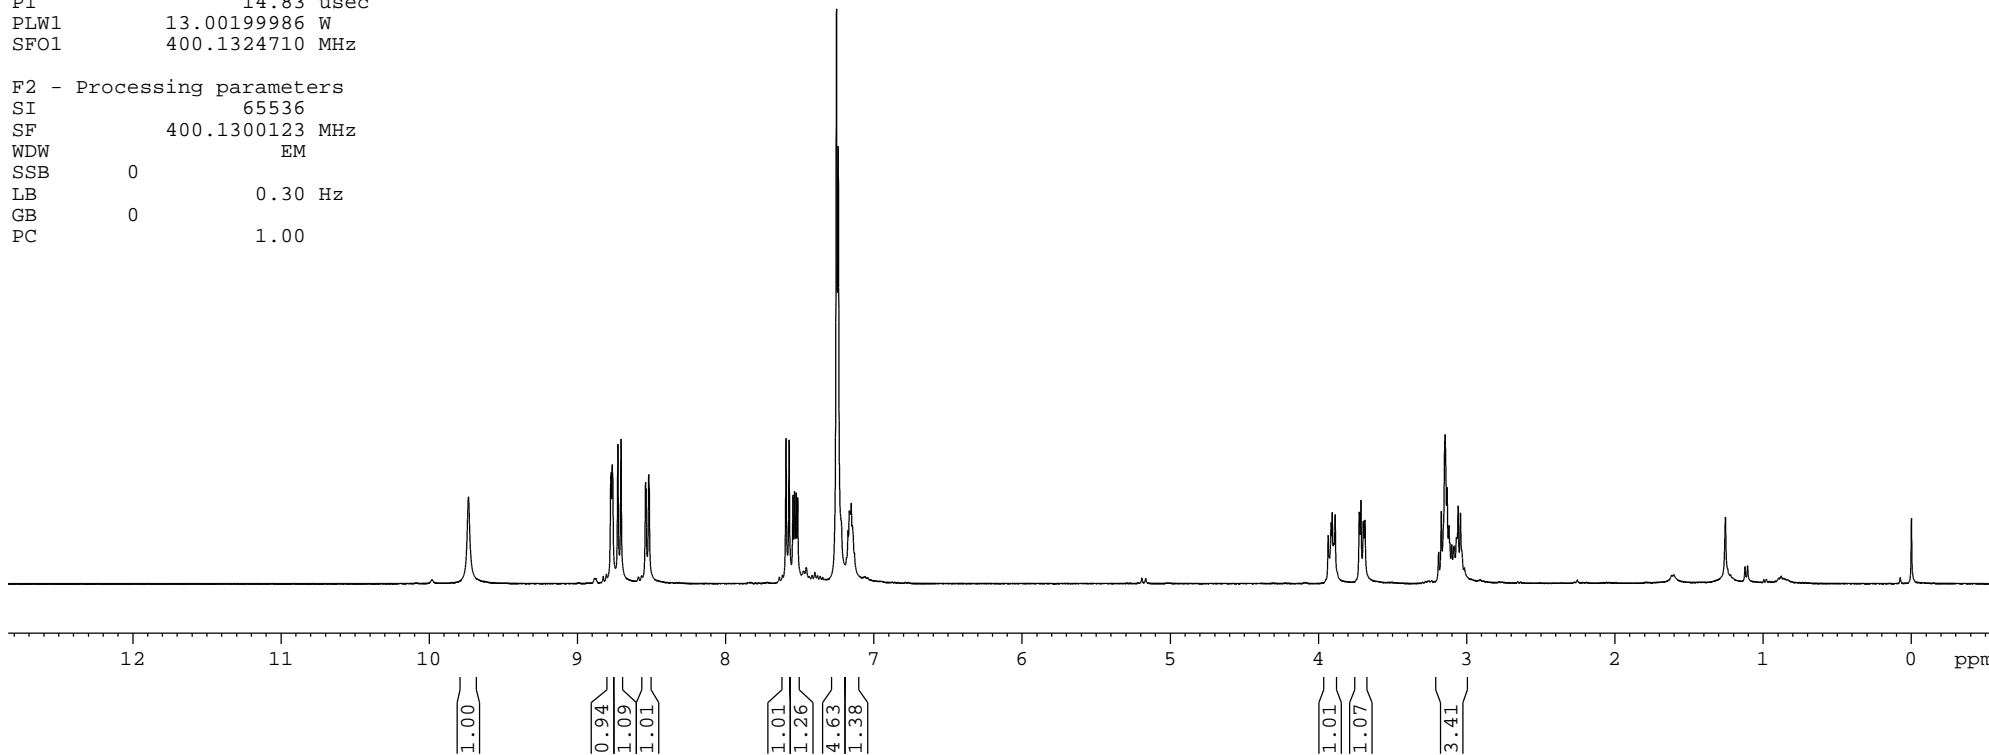

Current Data Parameters  
NAME 3h-c  
EXPNO 10  
PROCNO 1

F2 - Acquisition Parameters

Date\_ 20150422  
Time 7.03  
INSTRUM spect  
PROBHD 5 mm PABBO BB/  
PULPROG zgpg30  
TD 65536  
SOLVENT CDCl3  
NS 1020  
DS 4  
SWH 24038.461 Hz  
FIDRES 0.366798 Hz  
AQ 1.3631488 sec  
RG 202.1  
DW 20.800 usec  
DE 6.50 usec  
TE 297.1 K  
D1 2.0000000 sec  
D11 0.0300000 sec  
TD0 1

==== CHANNEL f1 =====  
SFO1 100.6228293 MHz  
NUC1 13C  
P1 9.85 usec  
PLW1 65.00000000 W

==== CHANNEL f2 =====  
SFO2 400.1316005 MHz  
NUC2 1H  
CPDPRG[2] waltz16  
PCPD2 90.00 usec  
PLW2 19.00000000 W

170.71

148.76  
138.99  
137.89  
133.44  
133.35  
129.05  
128.86  
127.26  
126.96  
125.97  
124.81  
122.46  
116.75

77.47  
77.16  
76.84

53.37

44.74

37.06

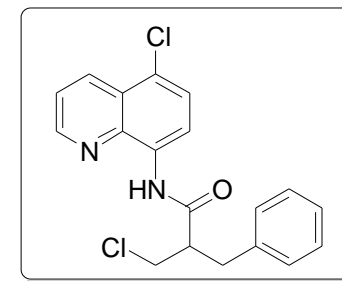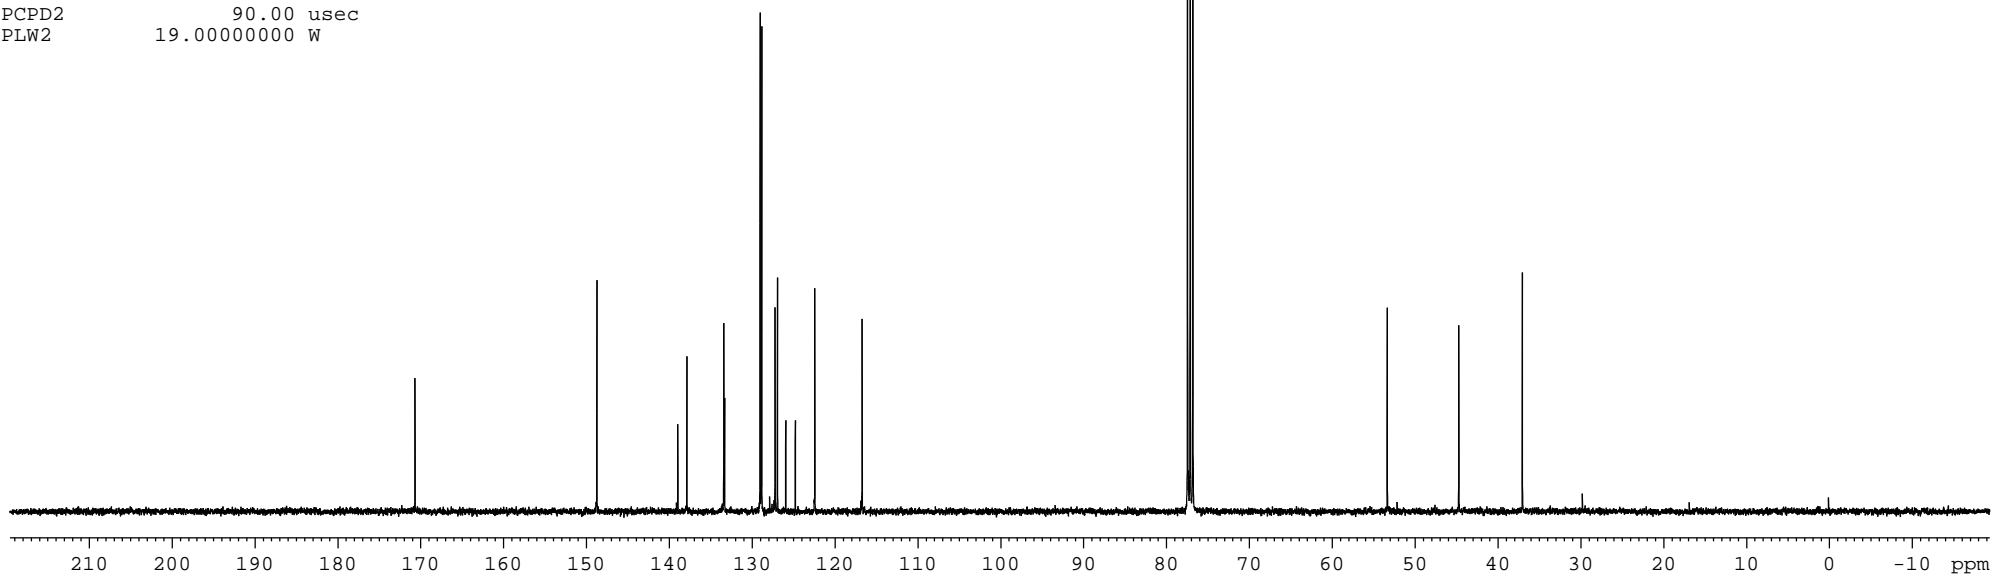

— 10.3845

8.9643  
8.9558  
8.5879  
8.5658  
8.5425  
8.2459  
8.0077  
7.9875  
7.7875  
7.7771  
7.7660  
7.7532  
7.7318  
7.5405  
7.5208  
7.5010

3.9271  
3.9038  
3.8794  
3.8314  
3.8212  
3.8020  
3.7351  
3.7254  
3.7095  
3.7000  
3.3365  
3.1613  
3.1414  
3.1271  
3.1079  
3.0862  
3.0692  
3.0522

Current Data Parameters  
NAME YXL-8-216-H-20141129  
EXPNO 10  
PROCNO 1

F2 - Acquisition Parameters  
Date\_ 20141129  
Time 22.22  
INSTRUM spect  
PROBHD 5 mm PABBO BB-  
PULPROG zg30  
TD 65536  
SOLVENT DMSO  
NS 16  
DS 2  
SWH 8223.685 Hz  
FIDRES 0.125483 Hz  
AQ 3.9846387 sec  
RG 130.81  
DW 60.800 usec  
DE 6.50 usec  
TE 298.4 K  
D1 1.00000000 sec  
TD0 1

==== CHANNEL f1 =====  
NUC1 1H  
P1 14.83 usec  
PLW1 13.00199986 W  
SFO1 400.1324710 MHz

F2 - Processing parameters  
SI 65536  
SF 400.1300041 MHz  
WDW EM  
SSB 0  
LB 0.30 Hz  
GB 0  
PC 1.00

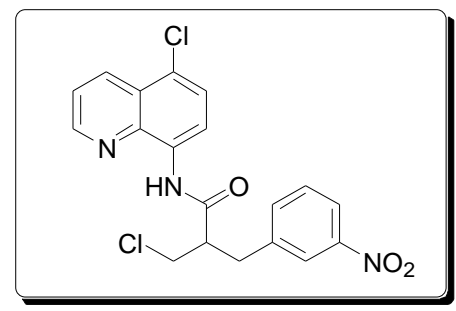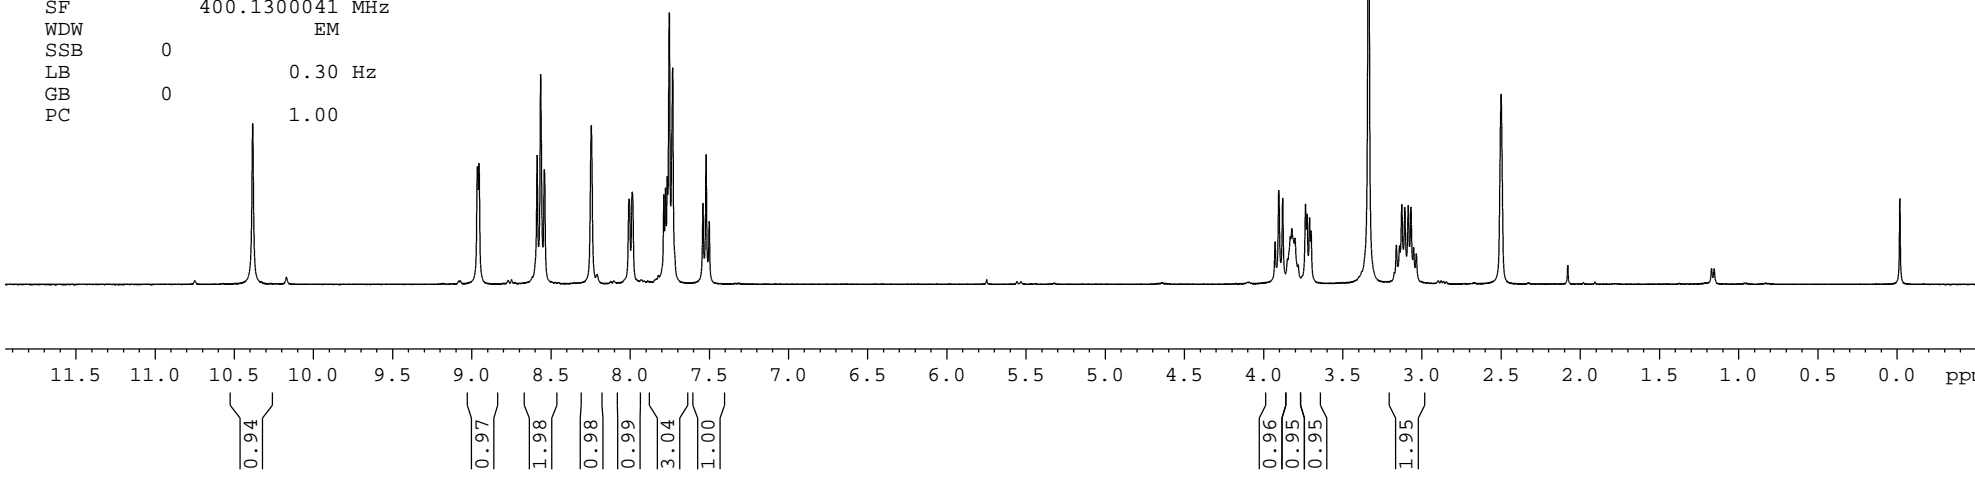

Current Data Parameters  
NAME YXL-8-216-C-20141129  
EXPNO 20  
PROCNO 1

F2 - Acquisition Parameters  
Date\_ 20141130  
Time 10.32  
INSTRUM spect  
PROBHD 5 mm PABBO BB-  
PULPROG zgpg30  
TD 65536  
SOLVENT DMSO  
NS 490  
DS 4  
SWH 24038.461 Hz  
FIDRES 0.366798 Hz  
AQ 1.3631988 sec  
RG 209.25  
DW 20.800 usec  
DE 6.50 usec  
TE 299.7 K  
D1 2.00000000 sec  
D11 0.03000000 sec  
TDO 1

=====  
CHANNEL f1  
=====  
NUC1 13C  
P1 10.59 usec  
PLW1 50.00299835 W  
SFO1 100.6228293 MHz

=====  
CHANNEL f2  
=====  
CPDPRG2 waltz16  
NUC2 1H  
PCPD2 90.00 usec  
PLW2 13.00199986 W  
PLW12 0.35303000 W  
PLW13 0.28595001 W  
SFO2 400.1316005 MHz

F2 - Processing parameters  
SI 32768  
SF 100.6128190 MHz  
WDW EM  
SSB 0  
LB 1.00 Hz  
GB 0  
PC 1.40

170.81

149.57  
147.77  
140.52  
138.93  
135.98  
133.77  
132.77  
129.67  
126.93  
125.27  
123.72  
123.56  
123.23  
121.45  
117.51

49.86  
45.02  
40.14  
39.93  
39.72  
39.52  
39.31  
39.10  
38.89  
35.74

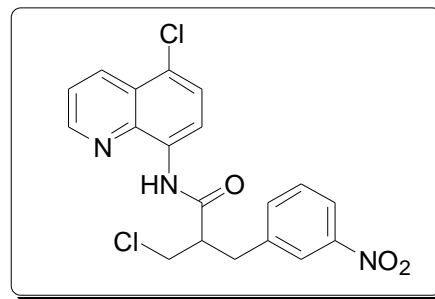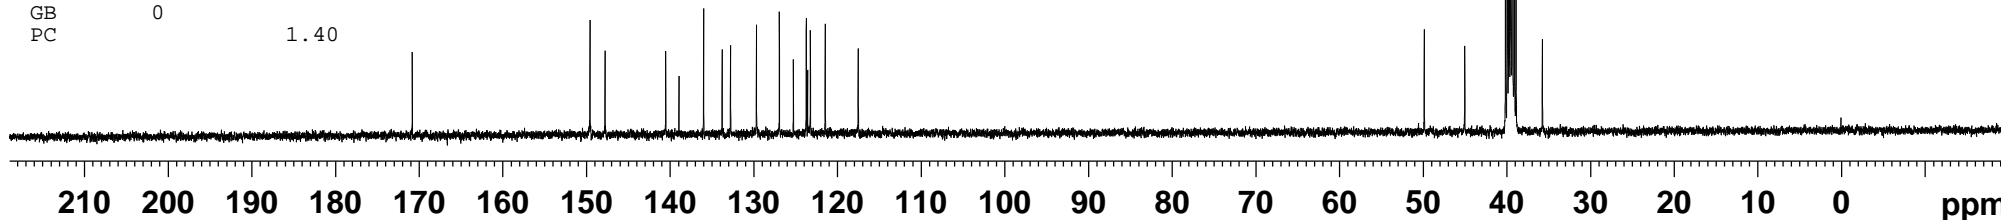

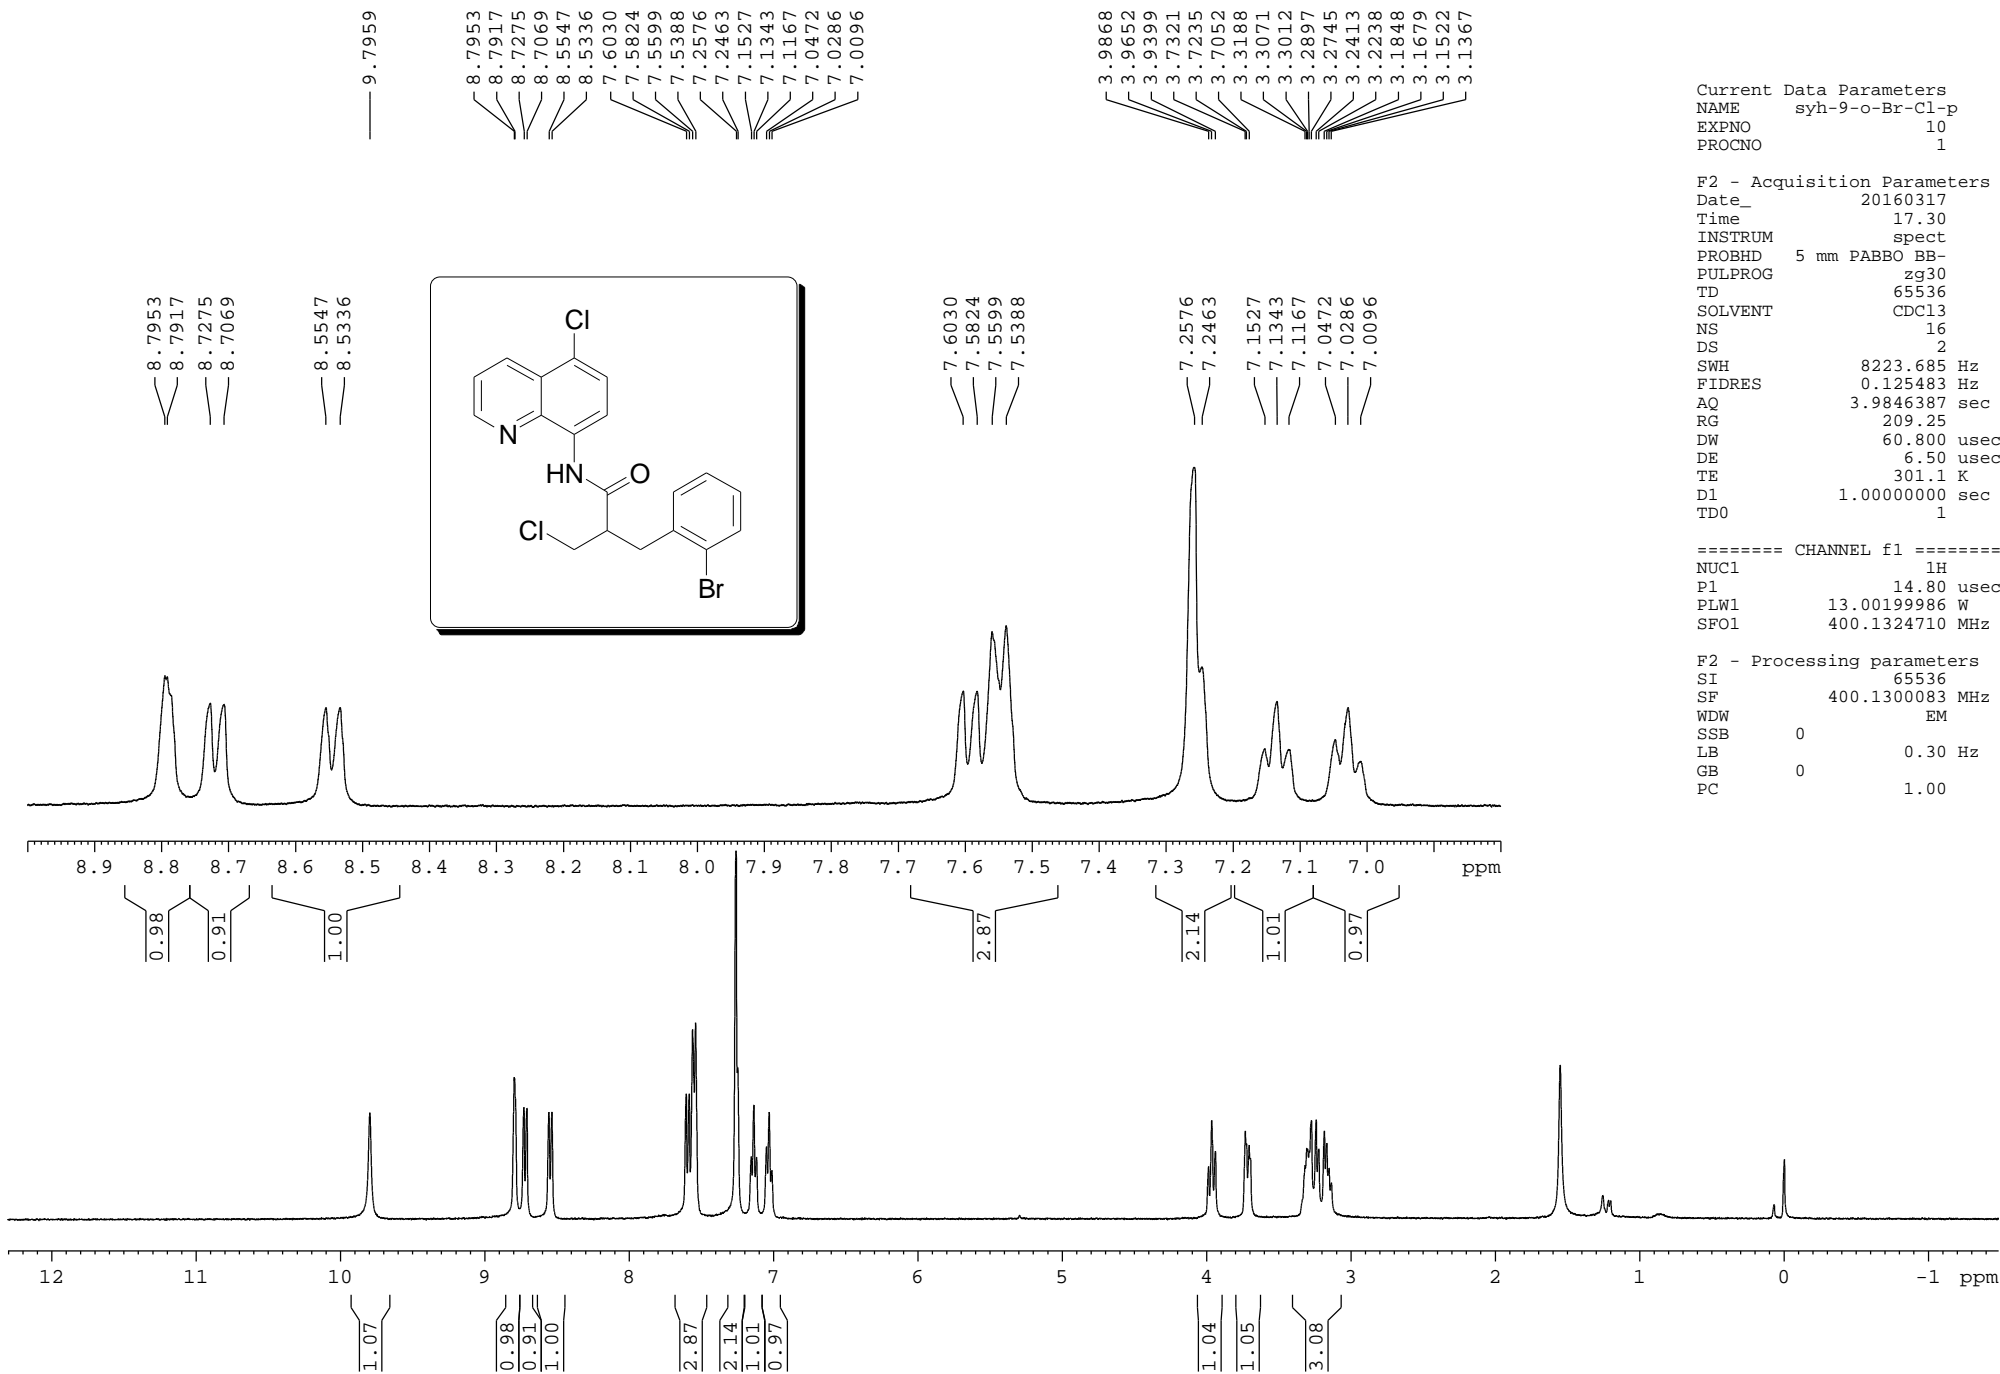

Current Data Parameters  
 NAME syh-9-o-Br-Cl-p  
 EXPNO 10  
 PROCNO 1

F2 - Acquisition Parameters  
 Date\_ 20160317  
 Time 17.30  
 INSTRUM spect  
 PROBHD 5 mm PABBO BB-  
 PULPROG zg30  
 TD 65536  
 SOLVENT CDCl3  
 NS 16  
 DS 2  
 SWH 8223.685 Hz  
 FIDRES 0.125483 Hz  
 AQ 3.9846387 sec  
 RG 209.25  
 DW 60.800 usec  
 DE 6.50 usec  
 TE 301.1 K  
 D1 1.00000000 sec  
 TDO 1

==== CHANNEL f1 =====  
 NUC1 1H  
 P1 14.80 usec  
 PLW1 13.00199986 W  
 SFO1 400.1324710 MHz

F2 - Processing parameters  
 SI 65536  
 SF 400.1300083 MHz  
 WDW EM  
 SSB 0  
 LB 0.30 Hz  
 GB 0  
 PC 1.00

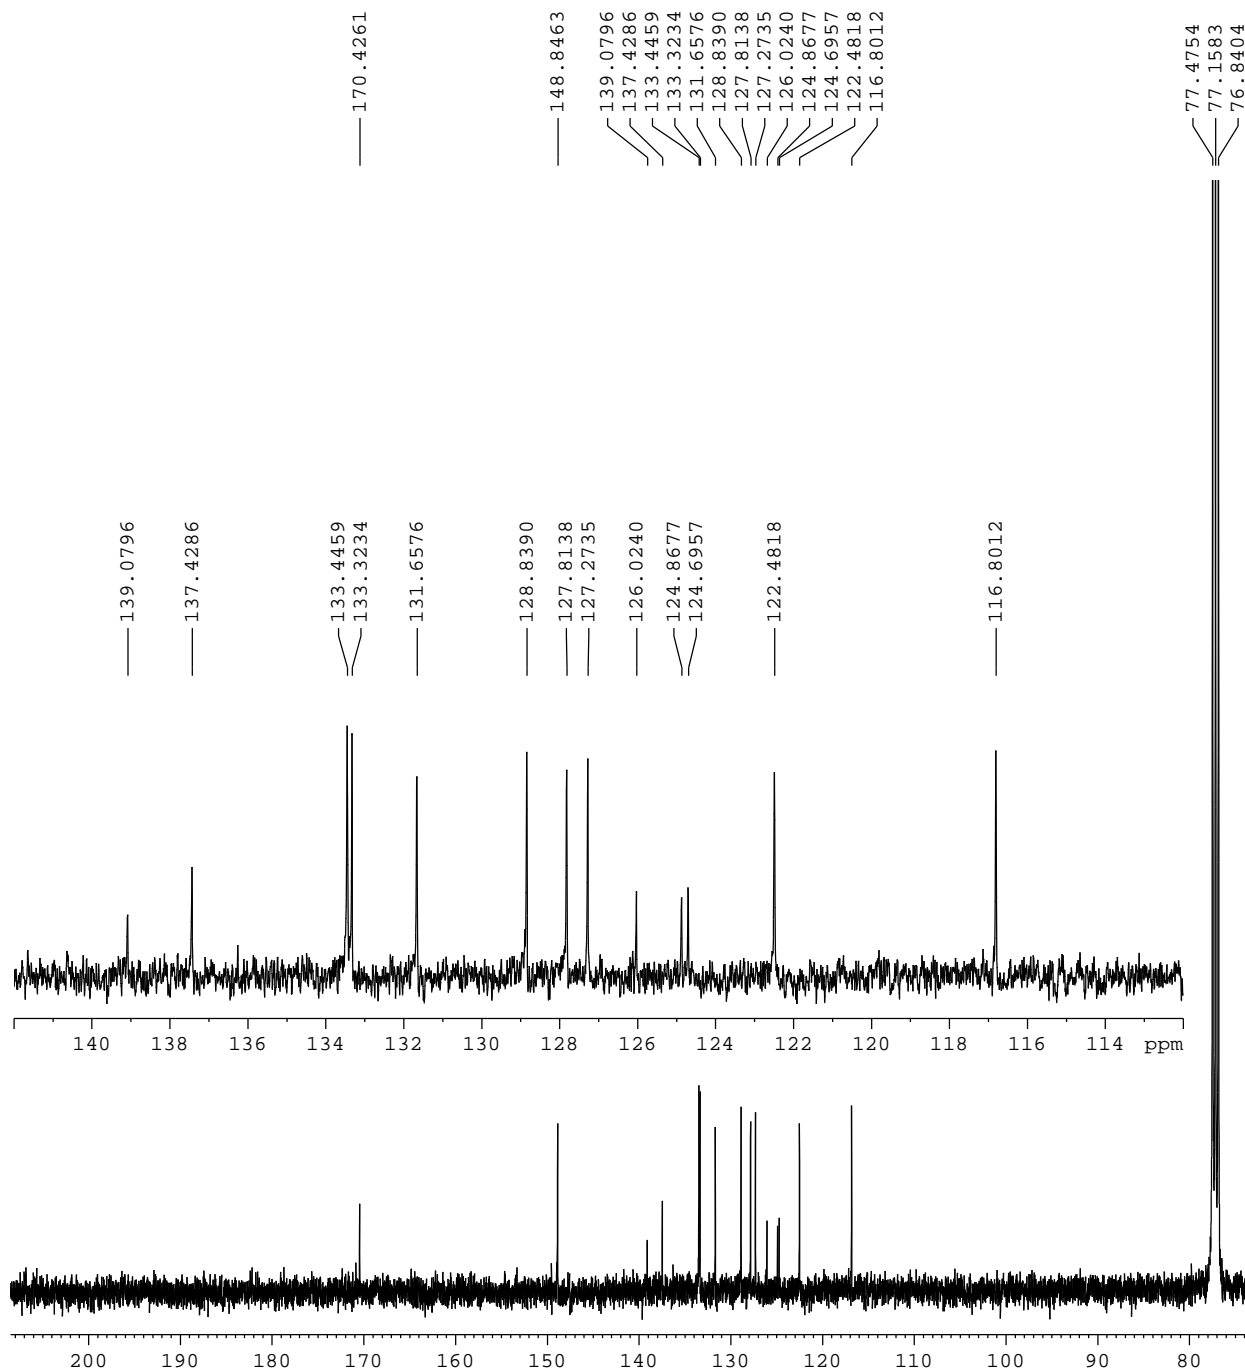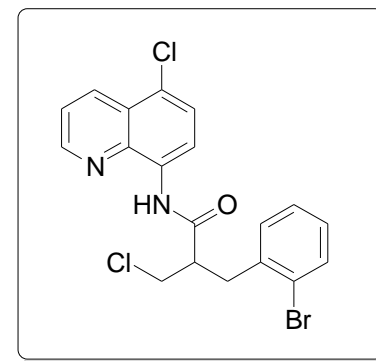

Current Data Parameters  
 NAME syh-9-o-Br-Cl-p-c  
 EXPNO 20  
 PROCNO 1

F2 - Acquisition Parameters  
 Date\_ 20160318  
 Time 0.02  
 INSTRUM spect  
 PROBHD 5 mm PABBO BB-  
 PULPROG zgpg30  
 TD 65536  
 SOLVENT CDCl3  
 NS 1536  
 DS 4  
 SWH 24038.461 Hz  
 FIDRES 0.366798 Hz  
 AQ 1.3631988 sec  
 RG 209.25  
 DW 20.800 usec  
 DE 6.50 usec  
 TE 302.8 K  
 D1 2.00000000 sec  
 D11 0.03000000 sec  
 TD0 1

===== CHANNEL f1 =====  
 NUC1 13C  
 P1 10.90 usec  
 PLW1 50.00299835 W  
 SFO1 100.6228293 MHz

===== CHANNEL f2 =====  
 CPDPRG2 waltz16  
 NUC2 1H  
 PCPD2 90.00 usec  
 PLW2 13.00199986 W  
 PLW12 0.38069001 W  
 PLW13 0.30836001 W  
 SFO2 400.1316005 MHz

F2 - Processing parameters  
 SI 32768  
 SF 100.6127528 MHz  
 WDW EM  
 SSB 0  
 LB 1.00 Hz  
 GB 0  
 PC 1.40



9.6760  
8.7758  
8.7724  
8.7655  
8.7620  
8.7025  
8.6815  
8.5543  
8.5508  
8.5331  
8.5296  
7.5964  
7.5755  
7.5622  
7.5516  
7.5409  
7.5303  
7.2594  
7.2232  
7.2096  
7.2021  
7.1886  
6.9362  
6.9146  
6.8930

3.9355  
3.9279  
3.9239  
3.9165  
3.9079  
3.8898  
3.7249  
3.7179  
3.7131  
3.6971  
3.6860  
3.1229  
3.1141  
3.0956  
3.0791  
3.0670  
3.0548  
3.0379

Current Data Parameters  
NAME 20150418-zx-2-h  
EXPNO 10  
PROCNO 1

F2 - Acquisition Parameters  
Date\_ 20150418  
Time 10.54  
INSTRUM spect  
PROBHD 5 mm PABBO BB-  
PULPROG zg30  
TD 65536  
SOLVENT CDCl3  
NS 16  
DS 2  
SWH 8223.685 Hz  
FIDRES 0.125483 Hz  
AQ 3.9846387 sec  
RG 165.63  
DW 60.800 usec  
DE 6.50 usec  
TE 300.8 K  
D1 1.00000000 sec  
TD0 1

==== CHANNEL f1 =====  
NUC1 1H  
P1 14.83 usec  
PLW1 13.00199986 W  
SF01 400.1324710 MHz

F2 - Processing parameters  
SI 65536  
SF 400.1300100 MHz  
WDW EM  
SSB 0  
LB 0.30 Hz  
GB 0  
PC 1.00

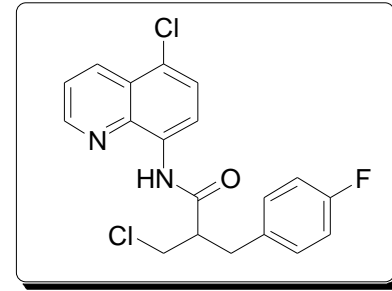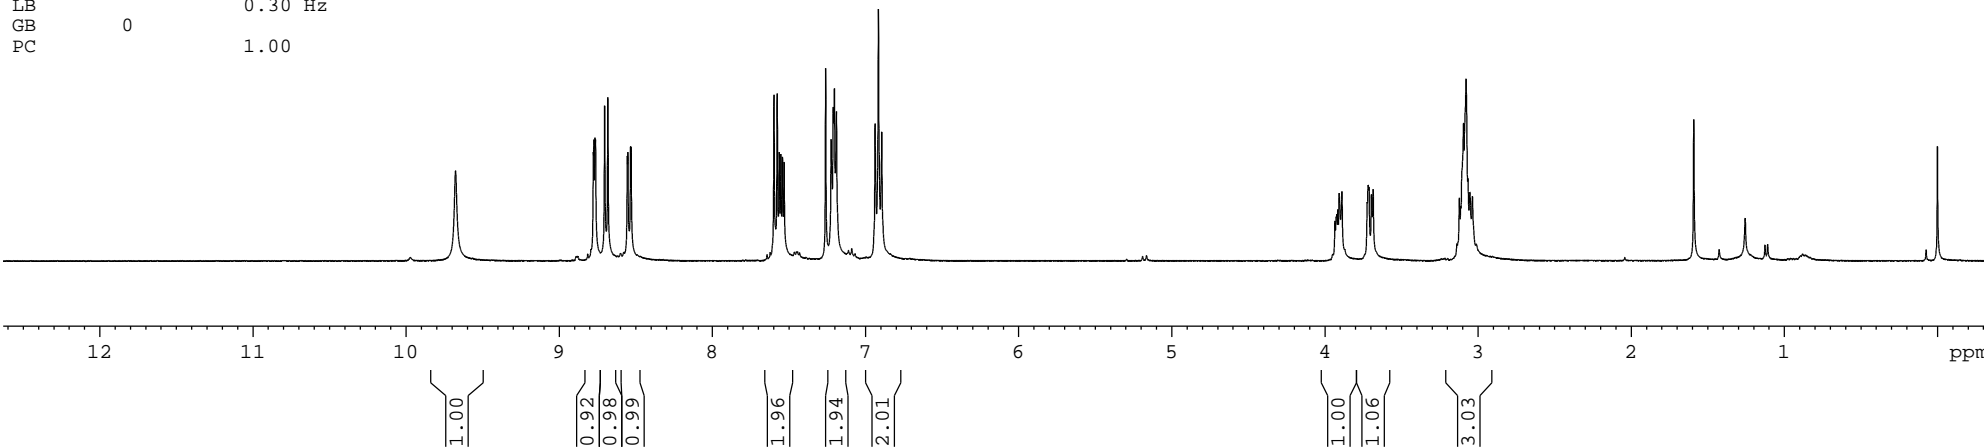

Current Data Parameters  
NAME 20150418-zx-c  
EXPNO 11  
PROCNO 1

F2 - Acquisition Parameters  
Date\_ 20150419  
Time 2.48  
INSTRUM spect  
PROBHD 5 mm PABBO BB-  
PULPROG zgpg30  
TD 65536  
SOLVENT CDCl3  
NS 777  
DS 4  
SWH 24038.461 Hz  
FIDRES 0.366798 Hz  
AQ 1.3631988 sec  
RG 209.25  
DW 20.800 usec  
DE 6.50 usec  
TE 302.2 K  
D1 2.0000000 sec  
D11 0.0300000 sec  
TD0 1

==== CHANNEL f1 =====  
NUC1 13C  
P1 10.59 usec  
PLW1 50.00299835 W  
SFO1 100.6228293 MHz

==== CHANNEL f2 =====  
CPDPRG2 waltz16  
NUC2 1H  
PCPD2 90.00 usec  
PLW2 13.00199986 W  
PLW12 0.35303000 W  
PLW13 0.28595001 W  
SFO2 400.1316005 MHz

F2 - Processing parameters  
SI 32768  
SF 100.6127533 MHz  
WDW EM  
SSB 0  
LB 1.00 Hz  
GB 0  
PC 1.40

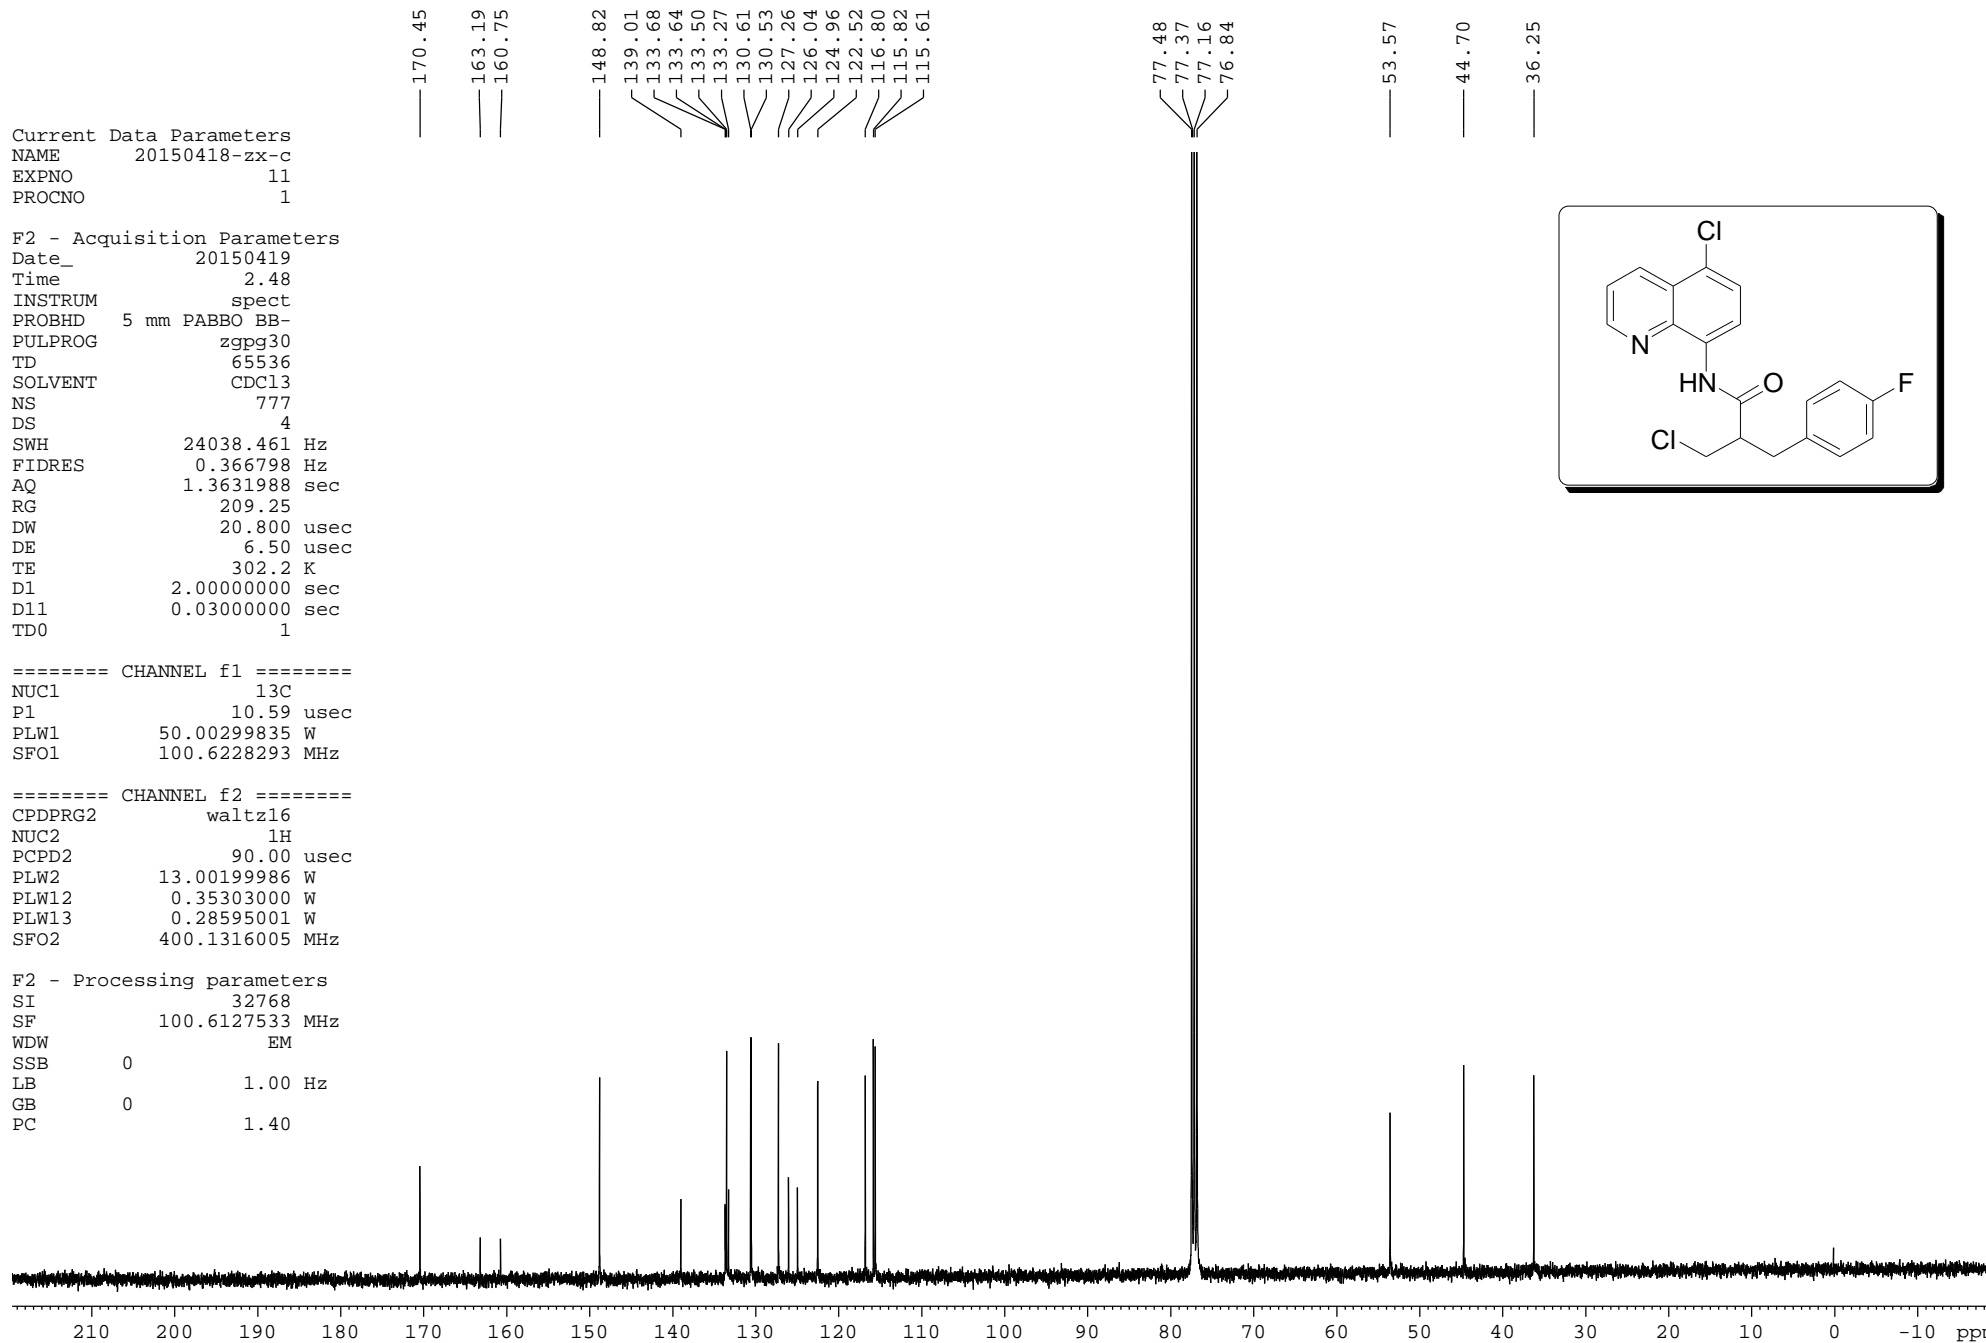

9.639

8.721  
8.712  
8.681  
8.660  
8.518  
8.497  
7.579  
7.558  
7.531  
7.521  
7.510  
7.499  
7.485  
7.465  
7.369  
7.349  
7.260

3.962  
3.944  
3.934  
3.917  
3.745  
3.733  
3.717  
3.707  
3.224  
3.190  
3.164  
3.153  
3.139  
3.128

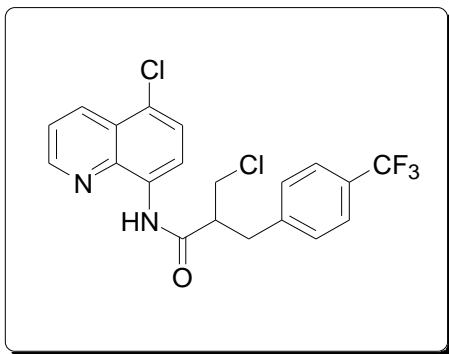

Current Data Parameters  
NAME syh-7-233-1  
EXPNO 10  
PROCNO 1

F2 - Acquisition Parameters  
Date\_ 20150425  
Time 21.48  
INSTRUM spect  
PROBHD 5 mm PABBO BB/  
PULPROG zg30  
TD 65536  
SOLVENT CDC13

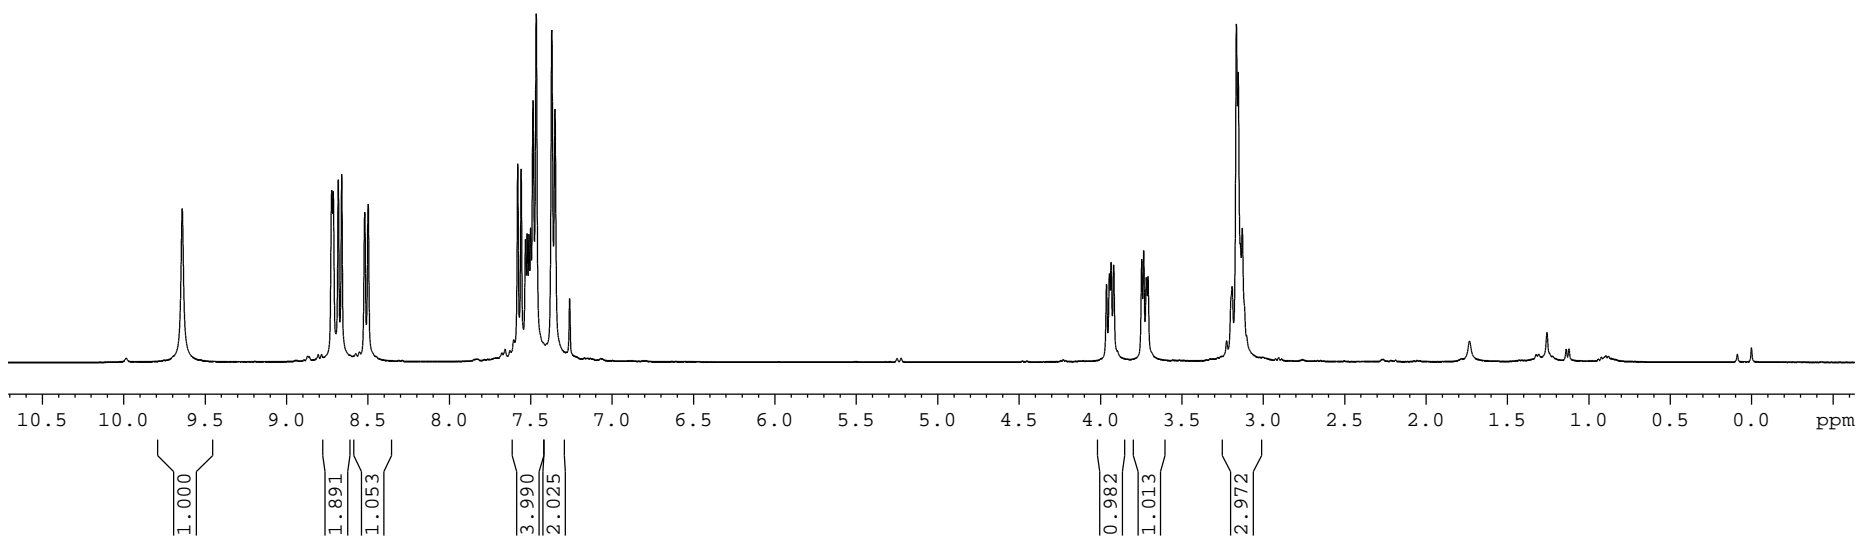

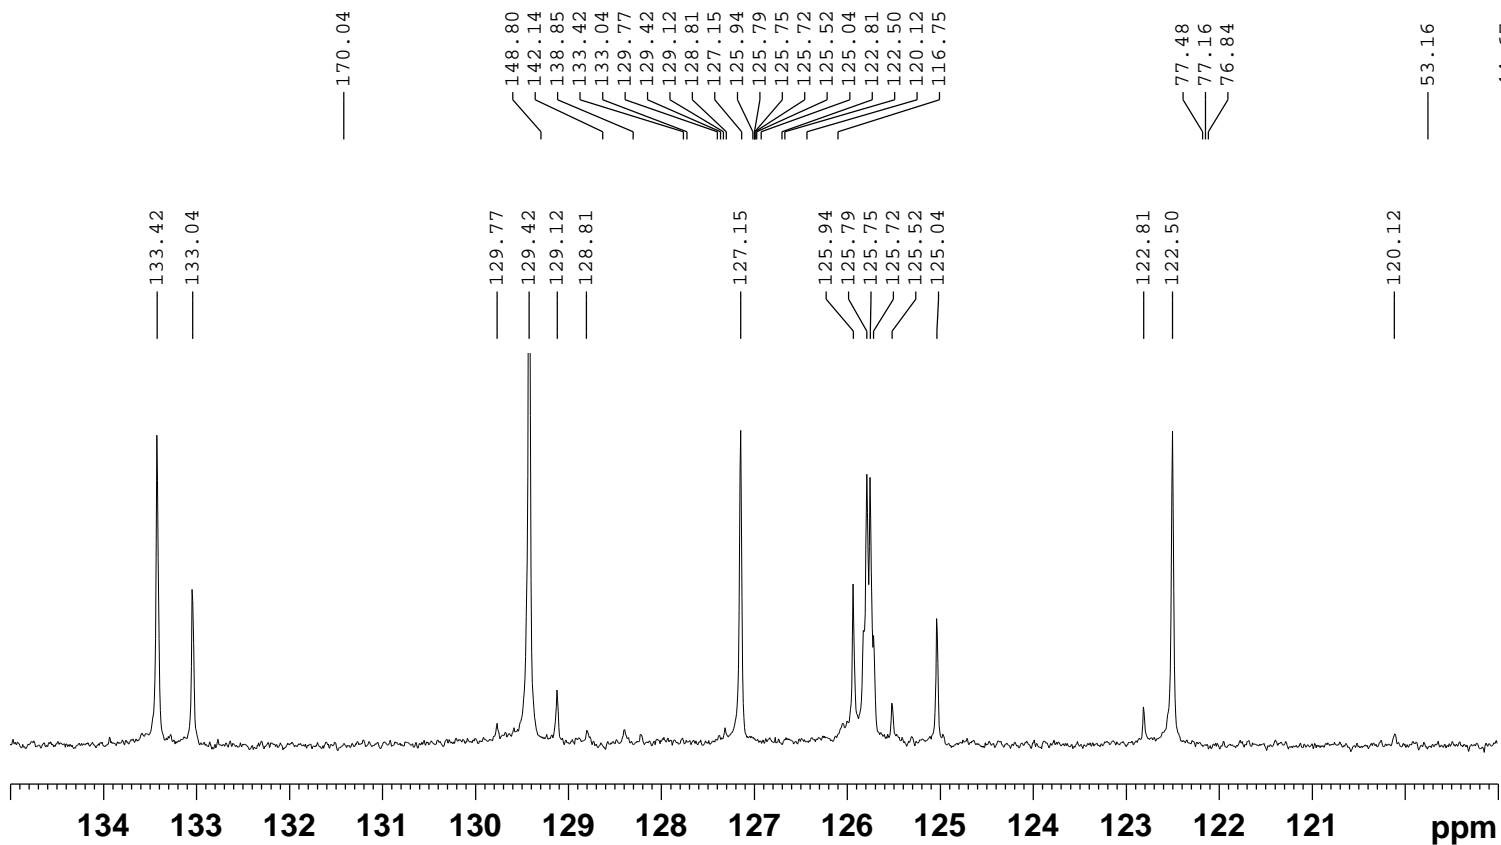

Current Data Parameters  
 NAME syh-7-233-1-c  
 EXPNO 10  
 PROCNO 1

F2 - Acquisition Parameters  
 Date\_ 20150426  
 Time 8.02  
 INSTRUM spect  
 PROBHD 5 mm PABBO BB/  
 PULPROG zgpg30  
 TD 65536  
 SOLVENT CDC13

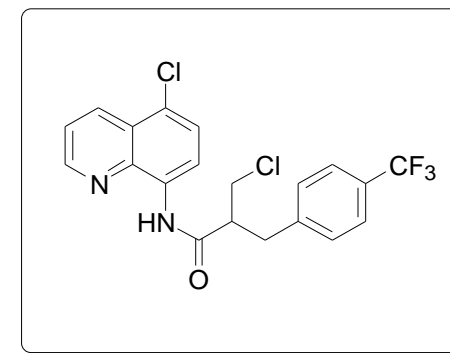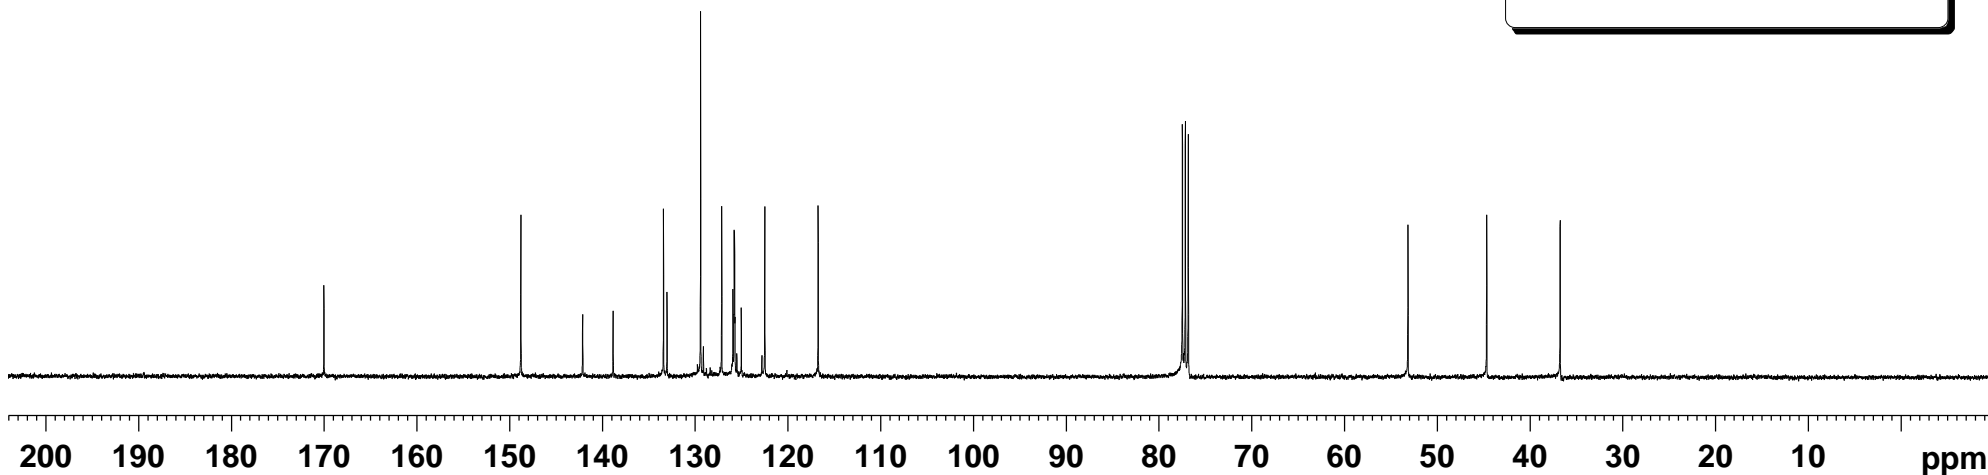

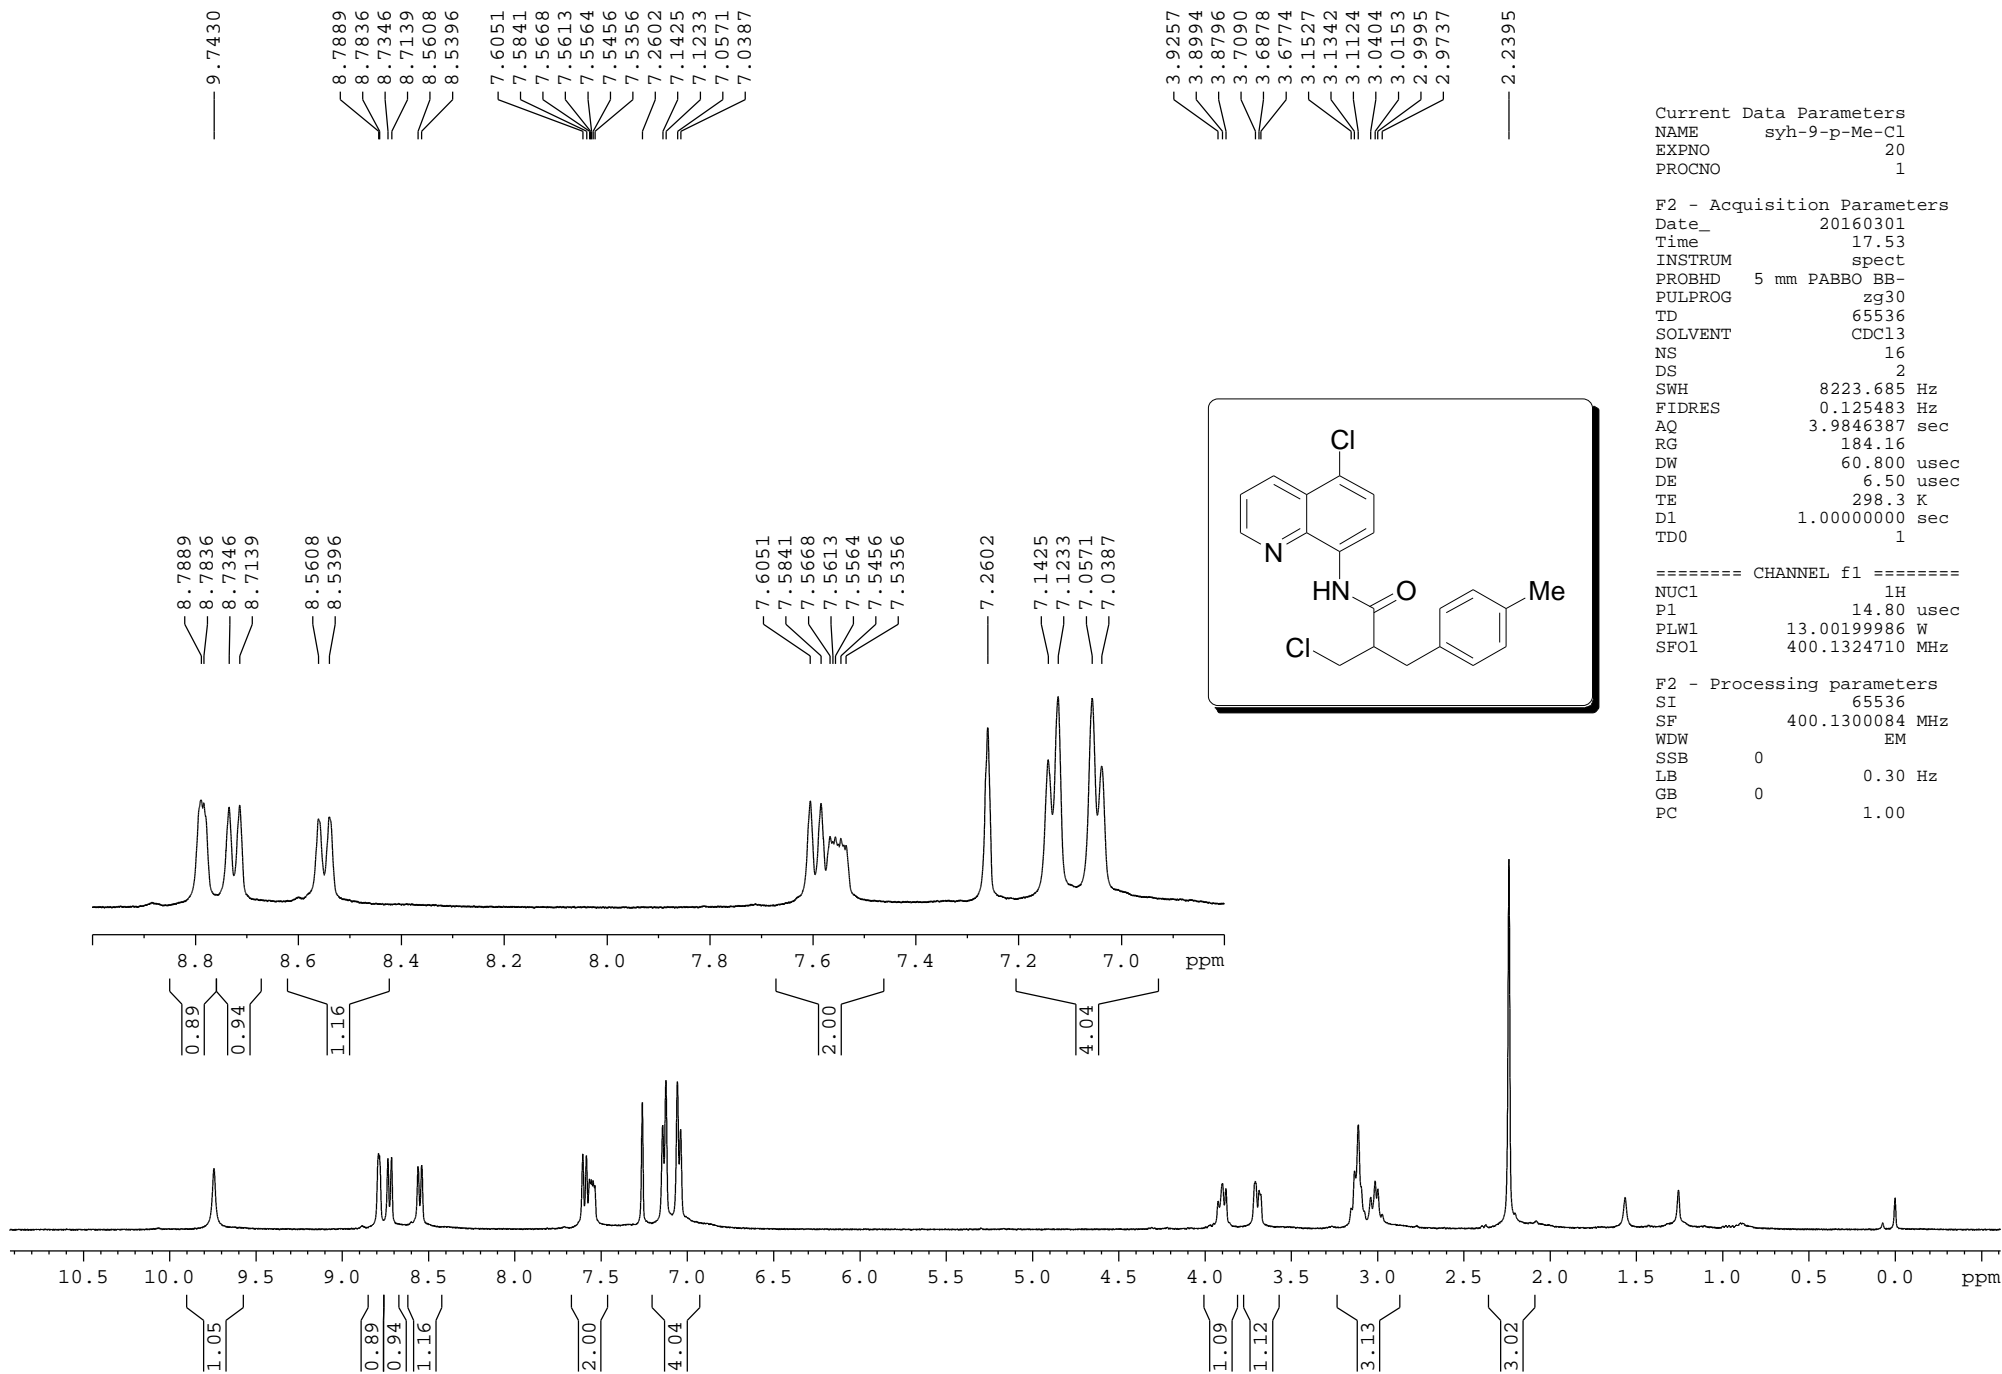

Current Data Parameters  
 NAME syh-9-p-Me-Cl  
 EXPNO 20  
 PROCNO 1

F2 - Acquisition Parameters  
 Date\_ 20160301  
 Time 17.53  
 INSTRUM spect  
 PROBHD 5 mm PABBO BB-  
 PULPROG zg30  
 TD 65536  
 SOLVENT CDCl3  
 NS 16  
 DS 2  
 SWH 8223.685 Hz  
 FIDRES 0.125483 Hz  
 AQ 3.9846387 sec  
 RG 184.16  
 DW 60.800 usec  
 DE 6.50 usec  
 TE 298.3 K  
 D1 1.00000000 sec  
 TD0 1

==== CHANNEL f1 =====  
 NUC1 1H  
 P1 14.80 usec  
 PLW1 13.00199986 W  
 SFO1 400.1324710 MHz

F2 - Processing parameters  
 SI 65536  
 SF 400.1300084 MHz  
 WDW EM  
 SSB 0  
 LB 0.30 Hz  
 GB 0  
 PC 1.00

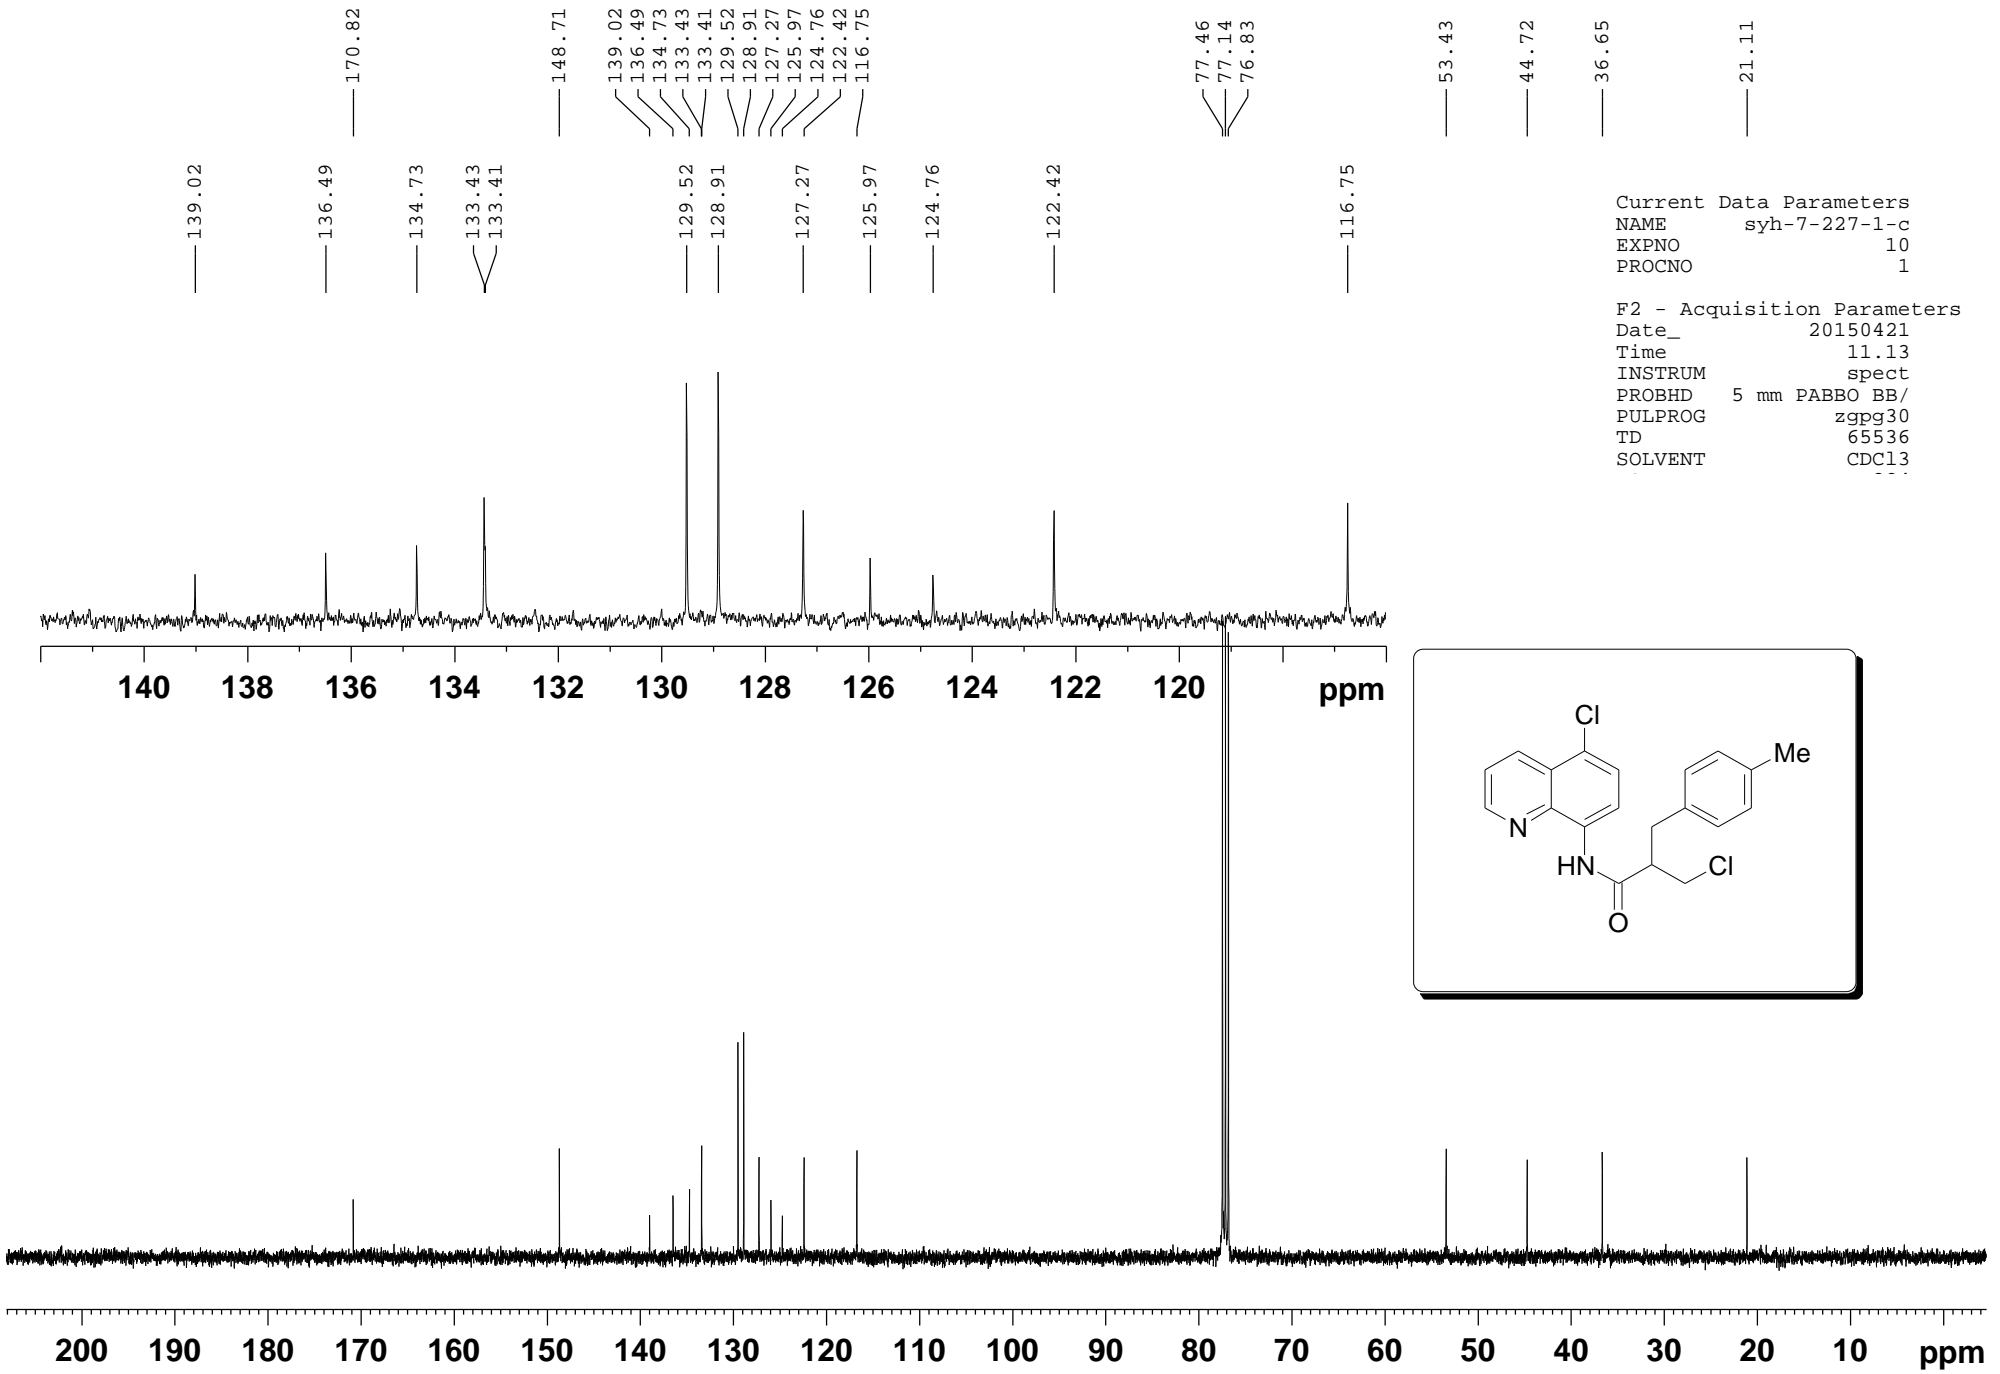

Current Data Parameters  
 NAME syh-7-227-1-c  
 EXPNO 10  
 PROCNO 1

F2 - Acquisition Parameters  
 Date\_ 20150421  
 Time 11.13  
 INSTRUM spect  
 PROBHD 5 mm PABBO BB/  
 PULPROG zgpg30  
 TD 65536  
 SOLVENT CDC13

9.5874  
 8.7315  
 8.7239  
 8.6844  
 8.6634  
 8.5404  
 8.5192  
 7.8129  
 7.7930  
 7.5935  
 7.5726  
 7.5452  
 7.5348  
 7.5241  
 7.5139  
 7.3417  
 7.3219  
 7.2590

3.5980  
 3.5793  
 3.5576  
 3.3683  
 3.3565  
 3.3400  
 3.1930  
 3.1576  
 3.1396  
 3.1218  
 3.1150  
 2.4664

Current Data Parameters  
 NAME YXL-8-263-2-H-141213  
 EXPNO 10  
 PROCNO 1

F2 - Acquisition Parameters  
 Date\_ 20141213  
 Time 15.33  
 INSTRUM spect  
 PROBHD 5 mm PABBO BB/  
 PULPROG zg30  
 TD 65536  
 SOLVENT CDCl3  
 NS 16  
 DS 2  
 SWH 8012.820 Hz  
 FIDRES 0.122266 Hz  
 AQ 4.0894465 sec  
 RG 89.81  
 DW 62.400 usec  
 DE 6.50 usec  
 TE 297.0 K  
 D1 1.00000000 sec  
 TD0 1

==== CHANNEL f1 =====  
 SFO1 400.1324710 MHz  
 NUC1 1H  
 P1 8.78 usec  
 PLW1 19.00000000 W

F2 - Processing parameters  
 SI 65536  
 SF 400.1300091 MHz  
 WDW EM  
 SSB 0  
 LB 0.30 Hz  
 GB 0  
 PC 1.00

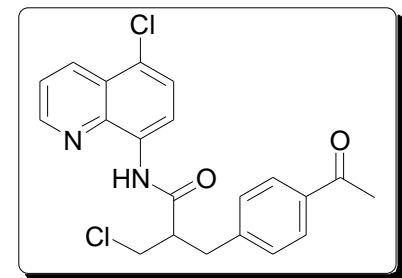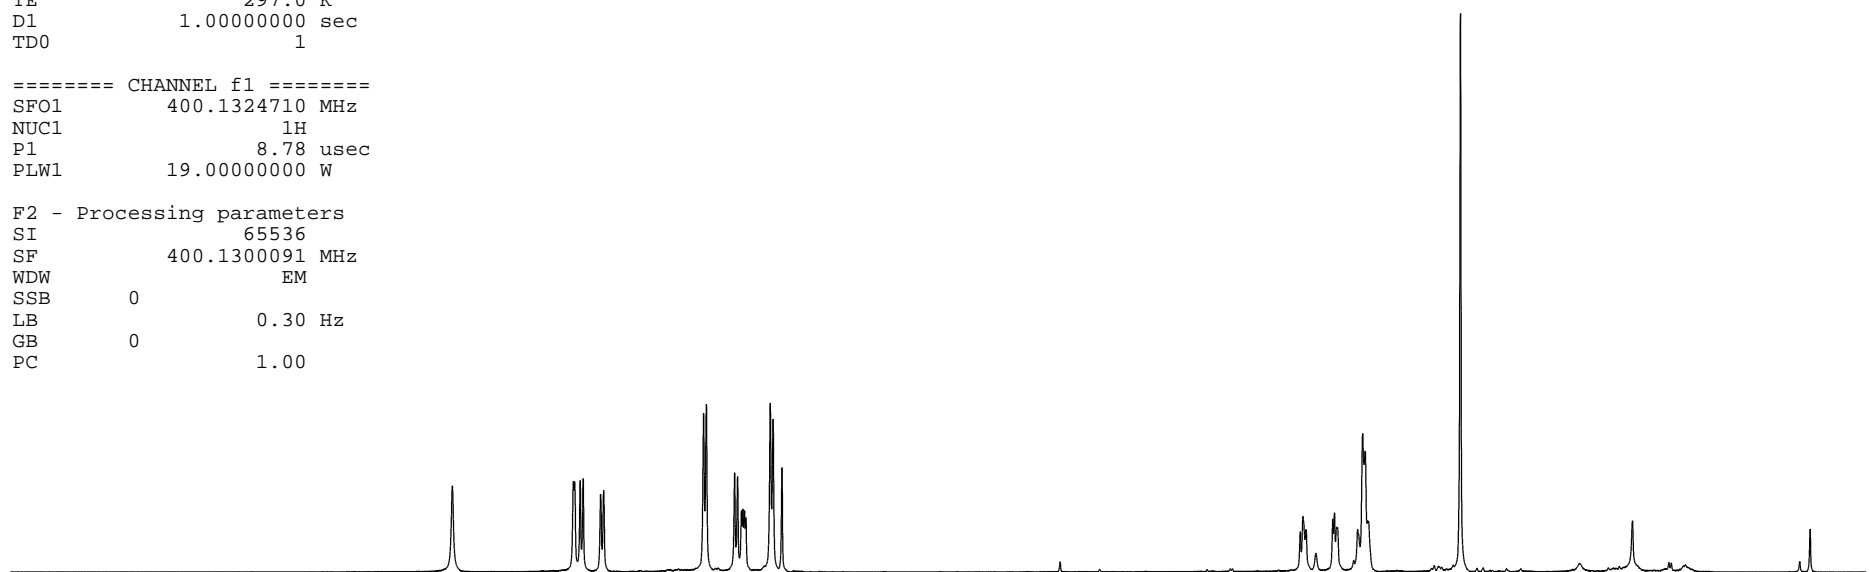

12 11 10 9 8 7 6 5 4 3 2 1 0 ppm

1.07  
 2.06  
 1.00  
 2.08  
 2.19  
 2.09  
 1.07  
 1.09  
 3.07  
 2.99

— 197.80  
 — 170.53  
 — 148.88  
 — 143.73  
 — 139.03  
 — 136.04  
 — 133.59  
 — 133.14  
 — 129.37  
 — 129.03  
 — 127.34  
 — 126.08  
 — 125.12  
 — 122.62  
 — 116.90

— 77.58  
 — 77.26  
 — 76.94  
 — 53.67  
 — 39.95  
 — 26.74  
 — 5.02

Current Data Parameters  
 NAME YXL-8-263-2-C-141213  
 EXPNO 10  
 PROCNO 1

F2 - Acquisition Parameters  
 Date\_ 20141214  
 Time 11.52  
 INSTRUM spect  
 PROBHD 5 mm PABBO BB/  
 PULPROG zgpg30  
 TD 65536  
 SOLVENT CDC13  
 NS 800  
 DS 4  
 SWH 24038.461 Hz  
 FIDRES 0.366798 Hz  
 AQ 1.3631988 sec  
 RG 202.1  
 DW 20.800 usec  
 DE 6.50 usec  
 TE 297.0 K  
 D1 2.00000000 sec  
 d11 0.03000000 sec  
 DELTA 1.89999998 sec  
 TD0 1  
 NUC1 13C  
 P1 9.85 usec  
 PLW1 65.00000000 W  
 SFO1 100.6228293 MHz  
 CPDPRG2  
 NUC2 1H  
 PLW2 19.00000000 W  
 PLW12 0.18082000 W  
 PLW13 0.14647000 W  
 SFO2 400.1316005 MHz

F2 - Processing parameters  
 SI 32768  
 SF 100.6127462 MHz  
 WDW EM  
 SSB 0  
 LB 1.00 Hz  
 GB 0  
 PC 1.40

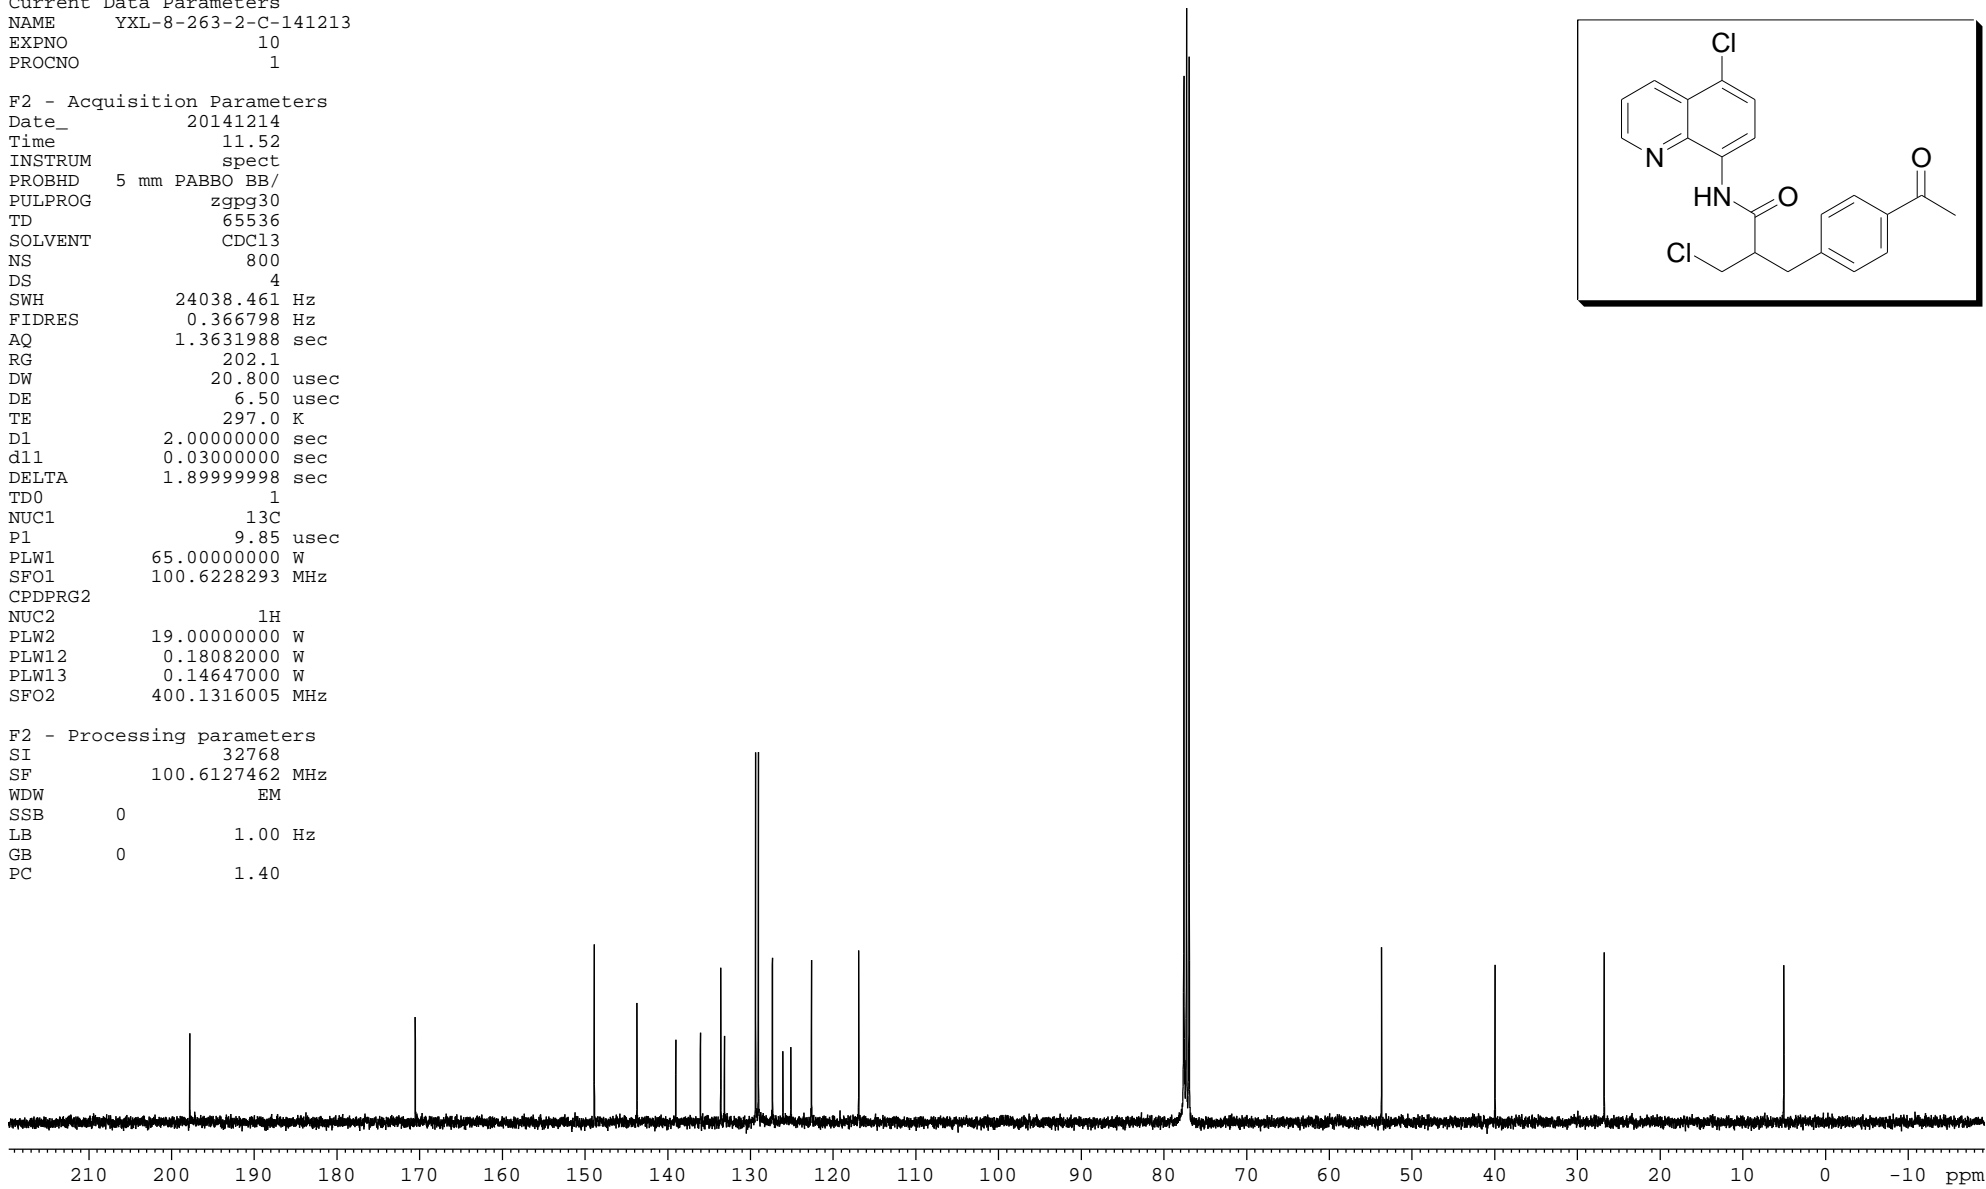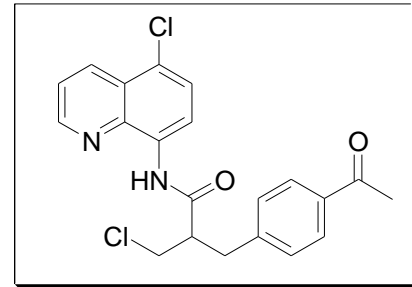



Current Data Parameters  
 NAME YXL-9-235-H-20150330  
 EXPNO 20  
 PROCNO 1

F2 - Acquisition Parameters  
 Date\_ 20150330  
 Time 14.16  
 INSTRUM spect  
 PROBHD 5 mm PABBO BB-  
 PULPROG zg30  
 TD 65536  
 SOLVENT CDCl3  
 NS 16  
 DS 2  
 SWH 8223.685 Hz  
 FIDRES 0.125483 Hz  
 AQ 3.9846387 sec  
 RG 63.51  
 DW 60.800 usec  
 DE 6.50 usec  
 TE 300.6 K  
 D1 1.00000000 sec  
 TD0 1

==== CHANNEL f1 =====  
 NUC1 1H  
 P1 14.83 usec  
 PLW1 13.00199986 W  
 SFO1 400.1324710 MHz

F2 - Processing parameters  
 SI 65536  
 SF 400.1300097 MHz  
 WDW EM  
 SSB 0  
 LB 0.30 Hz  
 GB 0  
 PC 1.00

9.9166  
 8.8686  
 8.8648  
 8.8581  
 8.8544  
 8.7732  
 8.7522  
 8.5814  
 8.5777  
 8.5601  
 8.5564  
 7.6154  
 7.5943  
 7.5892  
 7.5785  
 7.5678  
 7.5572  
 7.2598

5.3409  
 5.3287  
 5.3133  
 5.2995  
 5.2847  
 5.2725  
 3.9207  
 3.8984  
 3.8938  
 3.8717  
 3.6933  
 3.6806  
 3.6662  
 3.6536  
 2.8918  
 2.8787  
 2.8697  
 2.8569  
 2.8441  
 2.8351  
 2.8221  
 2.0301  
 1.9814  
 1.9664  
 1.9508  
 1.8931  
 1.8743  
 1.8542  
 1.8381  
 1.8211  
 1.7996  
 1.7358  
 1.7176  
 1.7034  
 1.6836  
 1.6690  
 1.6500  
 1.4460  
 1.4277  
 1.4101  
 1.3914  
 1.2992  
 1.2903  
 1.2485

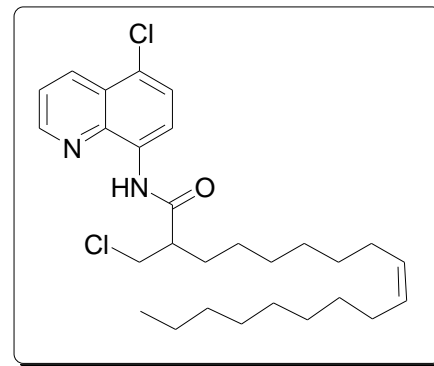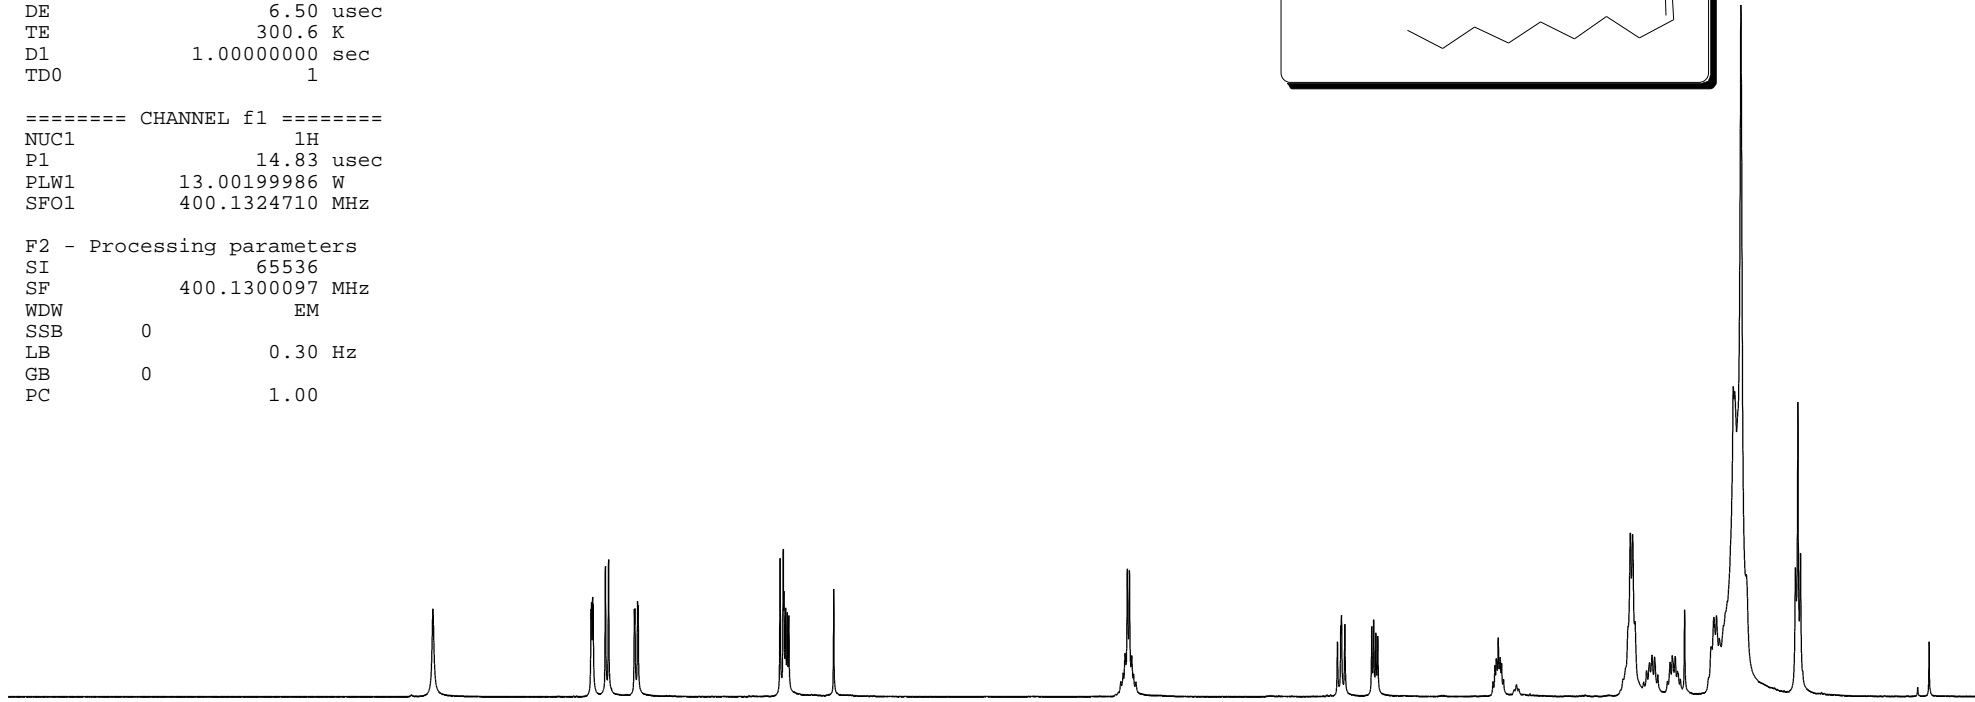

0.97  
 0.95  
 1.05  
 1.00  
 2.06  
 1.97  
 1.00  
 1.03  
 0.99  
 3.76  
 1.12  
 1.13  
 21.44  
 3.12

Current Data Parameters  
 NAME 30-C  
 EXPNO 10  
 PROCNO 1

F2 - Acquisition Parameters  
 Date\_ 20150331  
 Time 1.16  
 INSTRUM spect  
 PROBHD 5 mm PABBO BB/  
 PULPROG zgpg30  
 TD 65536  
 SOLVENT CDCl3  
 NS 200  
 DS 4  
 SWH 24038.461 Hz  
 FIDRES 0.366798 Hz  
 AQ 1.3631488 sec  
 RG 202.1  
 DW 20.800 usec  
 DE 6.50 usec  
 TE 297.3 K  
 D1 2.00000000 sec  
 D11 0.03000000 sec  
 TD0 1

==== CHANNEL f1 =====  
 SFO1 100.6228293 MHz  
 NUC1 13C  
 P1 9.85 usec  
 PLW1 65.00000000 W

==== CHANNEL f2 =====  
 SFO2 400.1316005 MHz  
 NUC2 1H  
 CPDPRG[2] waltz16  
 PCPD2 90.00 usec  
 PLW2 19.00000000 W  
 PLW12 0.18082000 W  
 PLW13 0.14647000 W

F2 - Processing parameters  
 SI 32768  
 SF 100.6127567 MHz  
 WDW EM  
 SSB 0  
 LB 1.00 Hz  
 GB 0

171.63

148.89

139.11  
 133.54  
 133.49  
 130.18  
 129.73  
 127.32  
 126.07  
 124.79  
 122.51  
 116.79

77.47  
 77.16  
 76.84

51.82  
 45.34  
 32.02  
 31.21  
 29.87  
 29.75  
 29.63  
 29.56  
 29.43  
 29.12  
 27.33  
 27.29  
 27.23  
 22.81  
 14.25

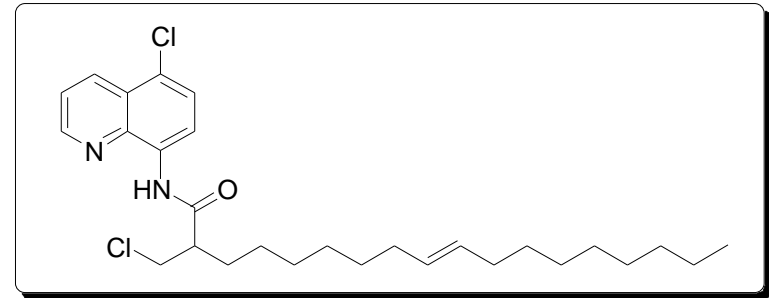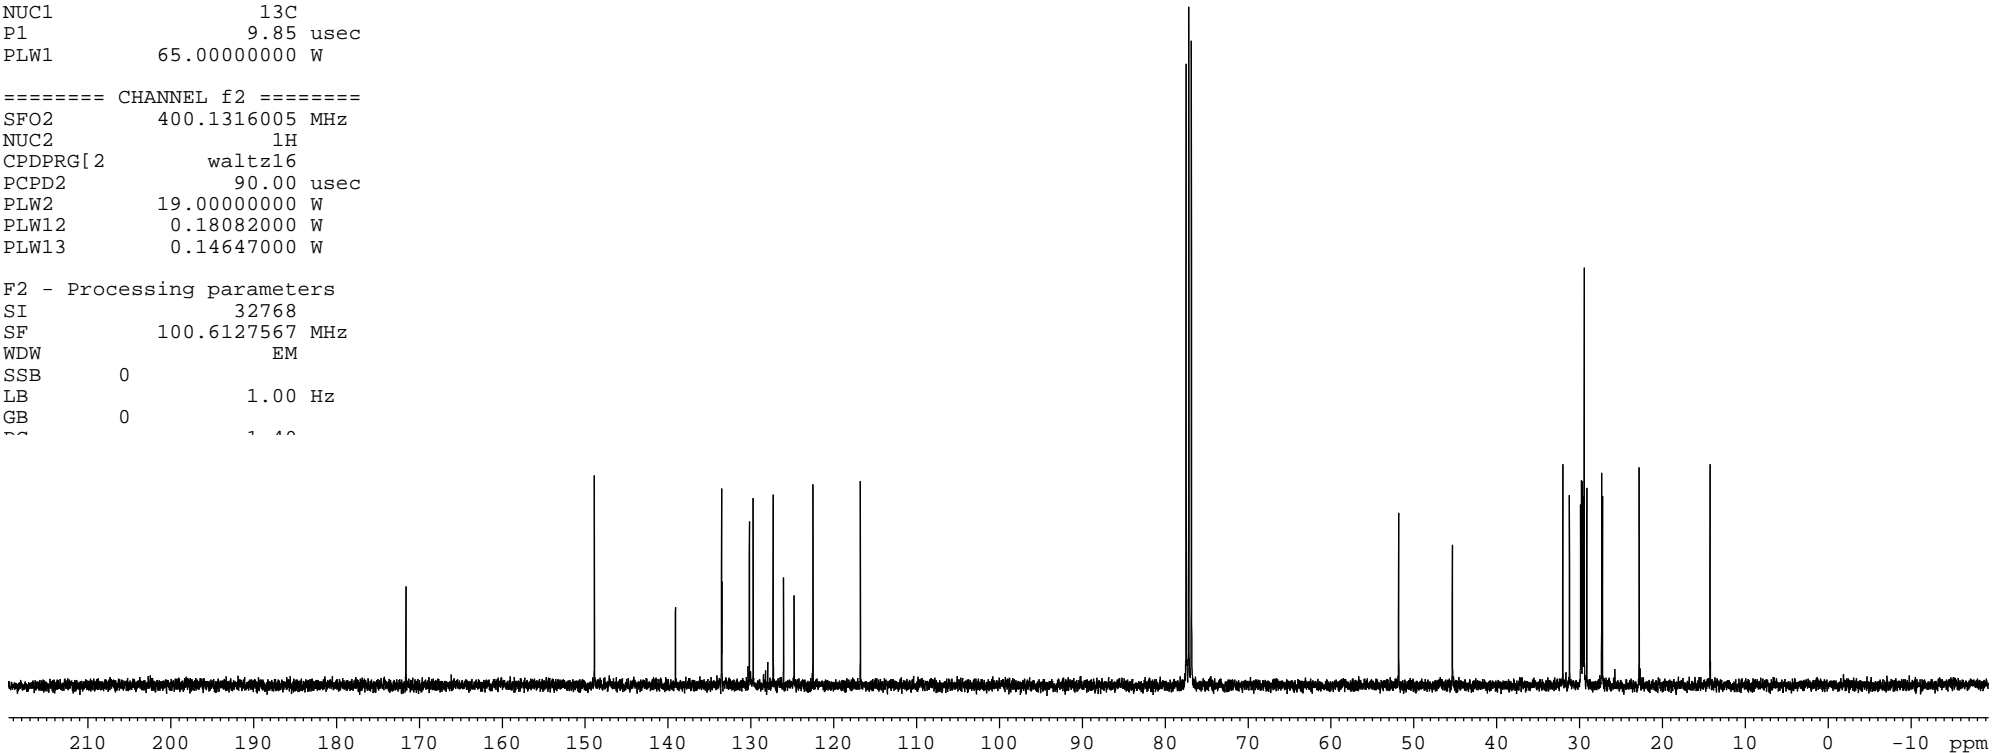

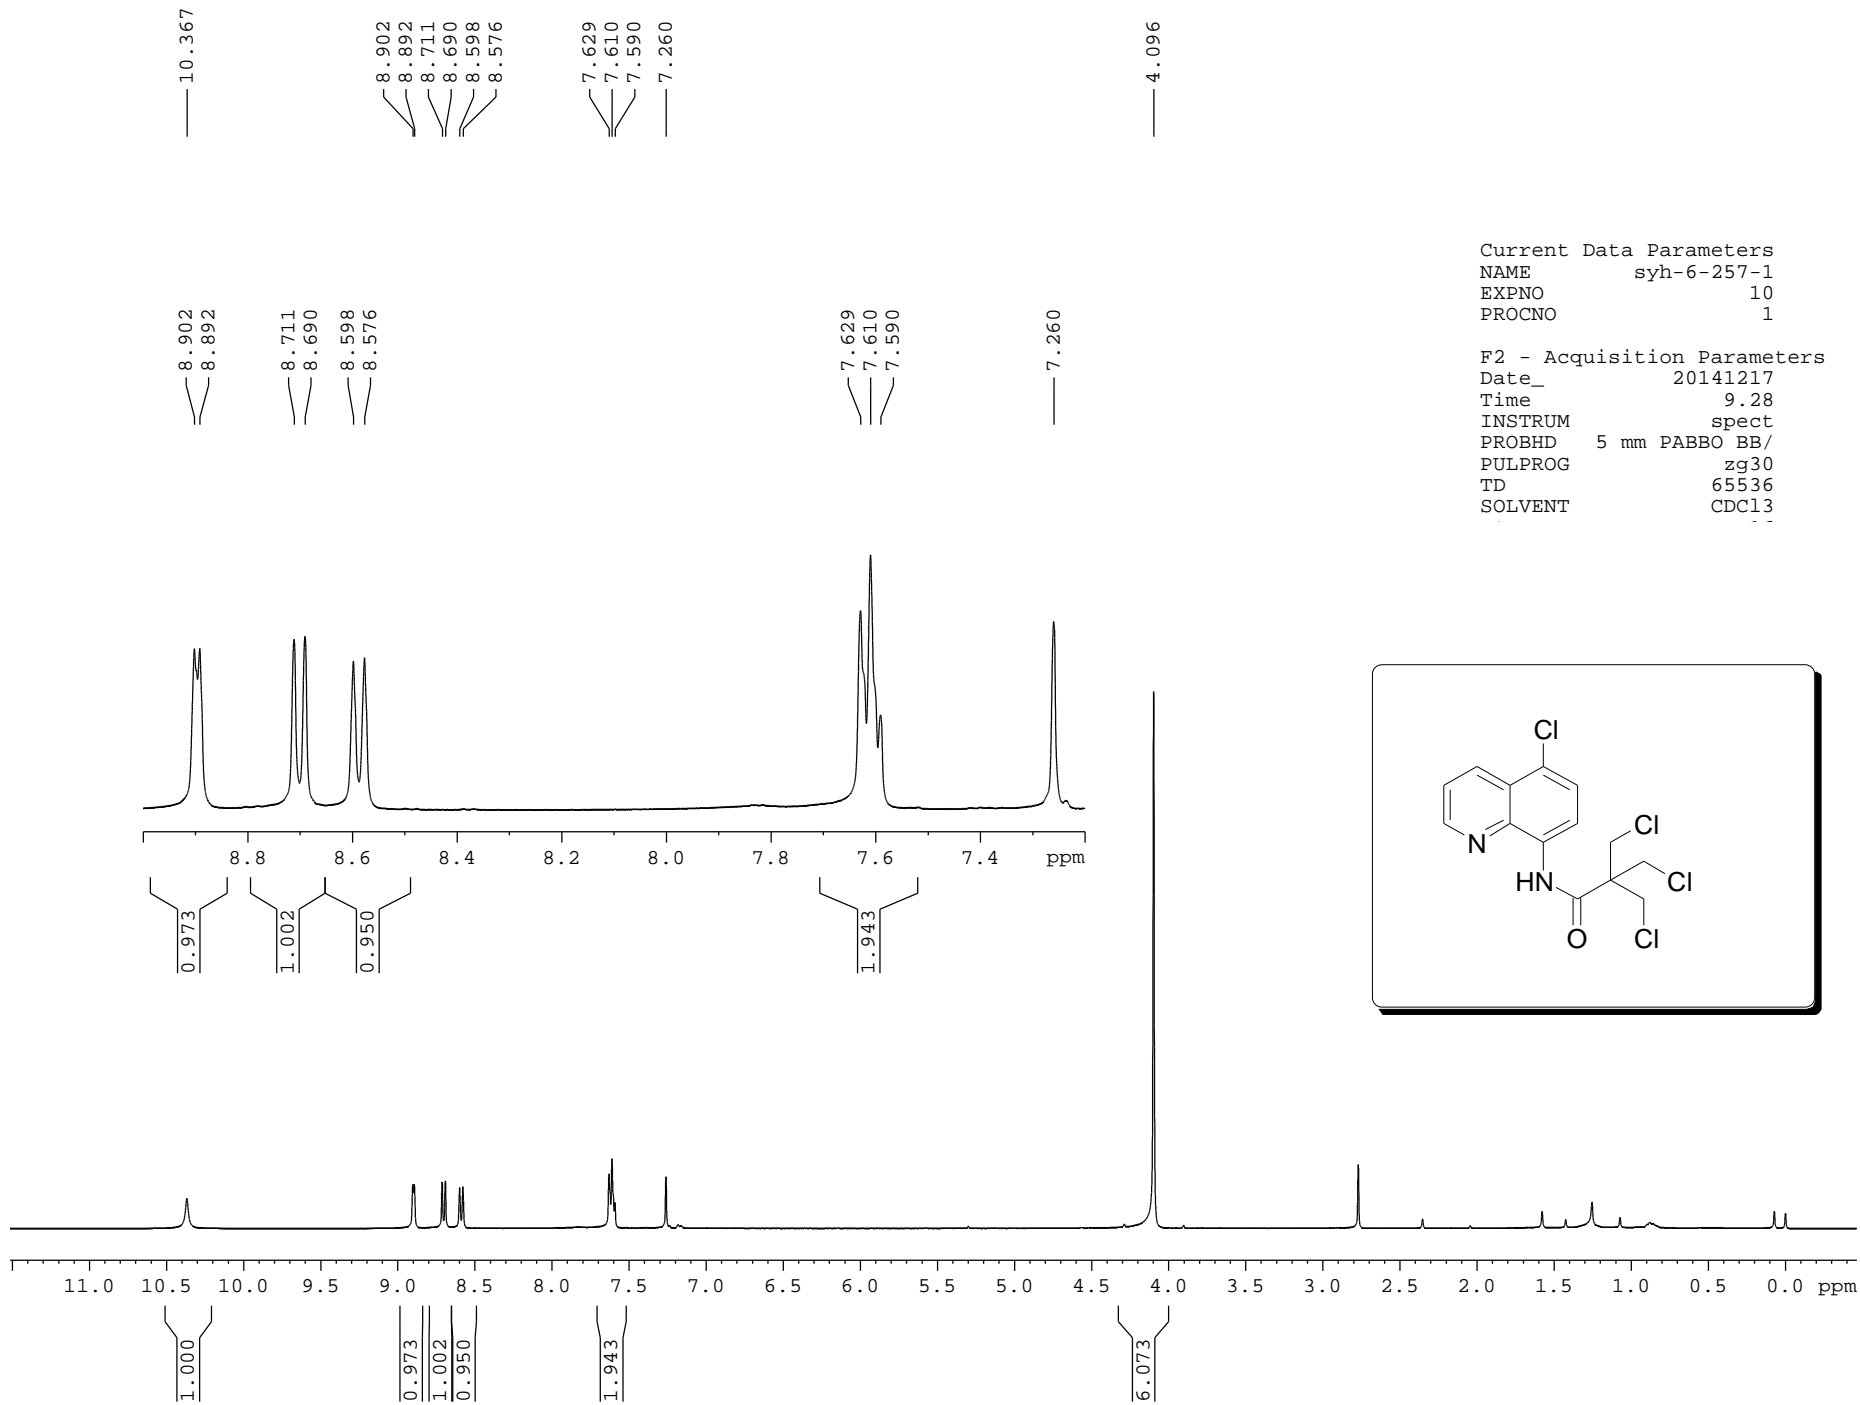

Current Data Parameters  
 NAME syh-6-257-1  
 EXPNO 10  
 PROCNO 1

F2 - Acquisition Parameters  
 Date\_ 20141217  
 Time 9.28  
 INSTRUM spect  
 PROBHD 5 mm PABBO BB/  
 PULPROG zg30  
 TD 65536  
 SOLVENT CDCl3

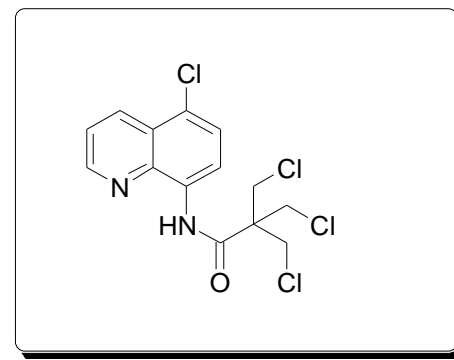

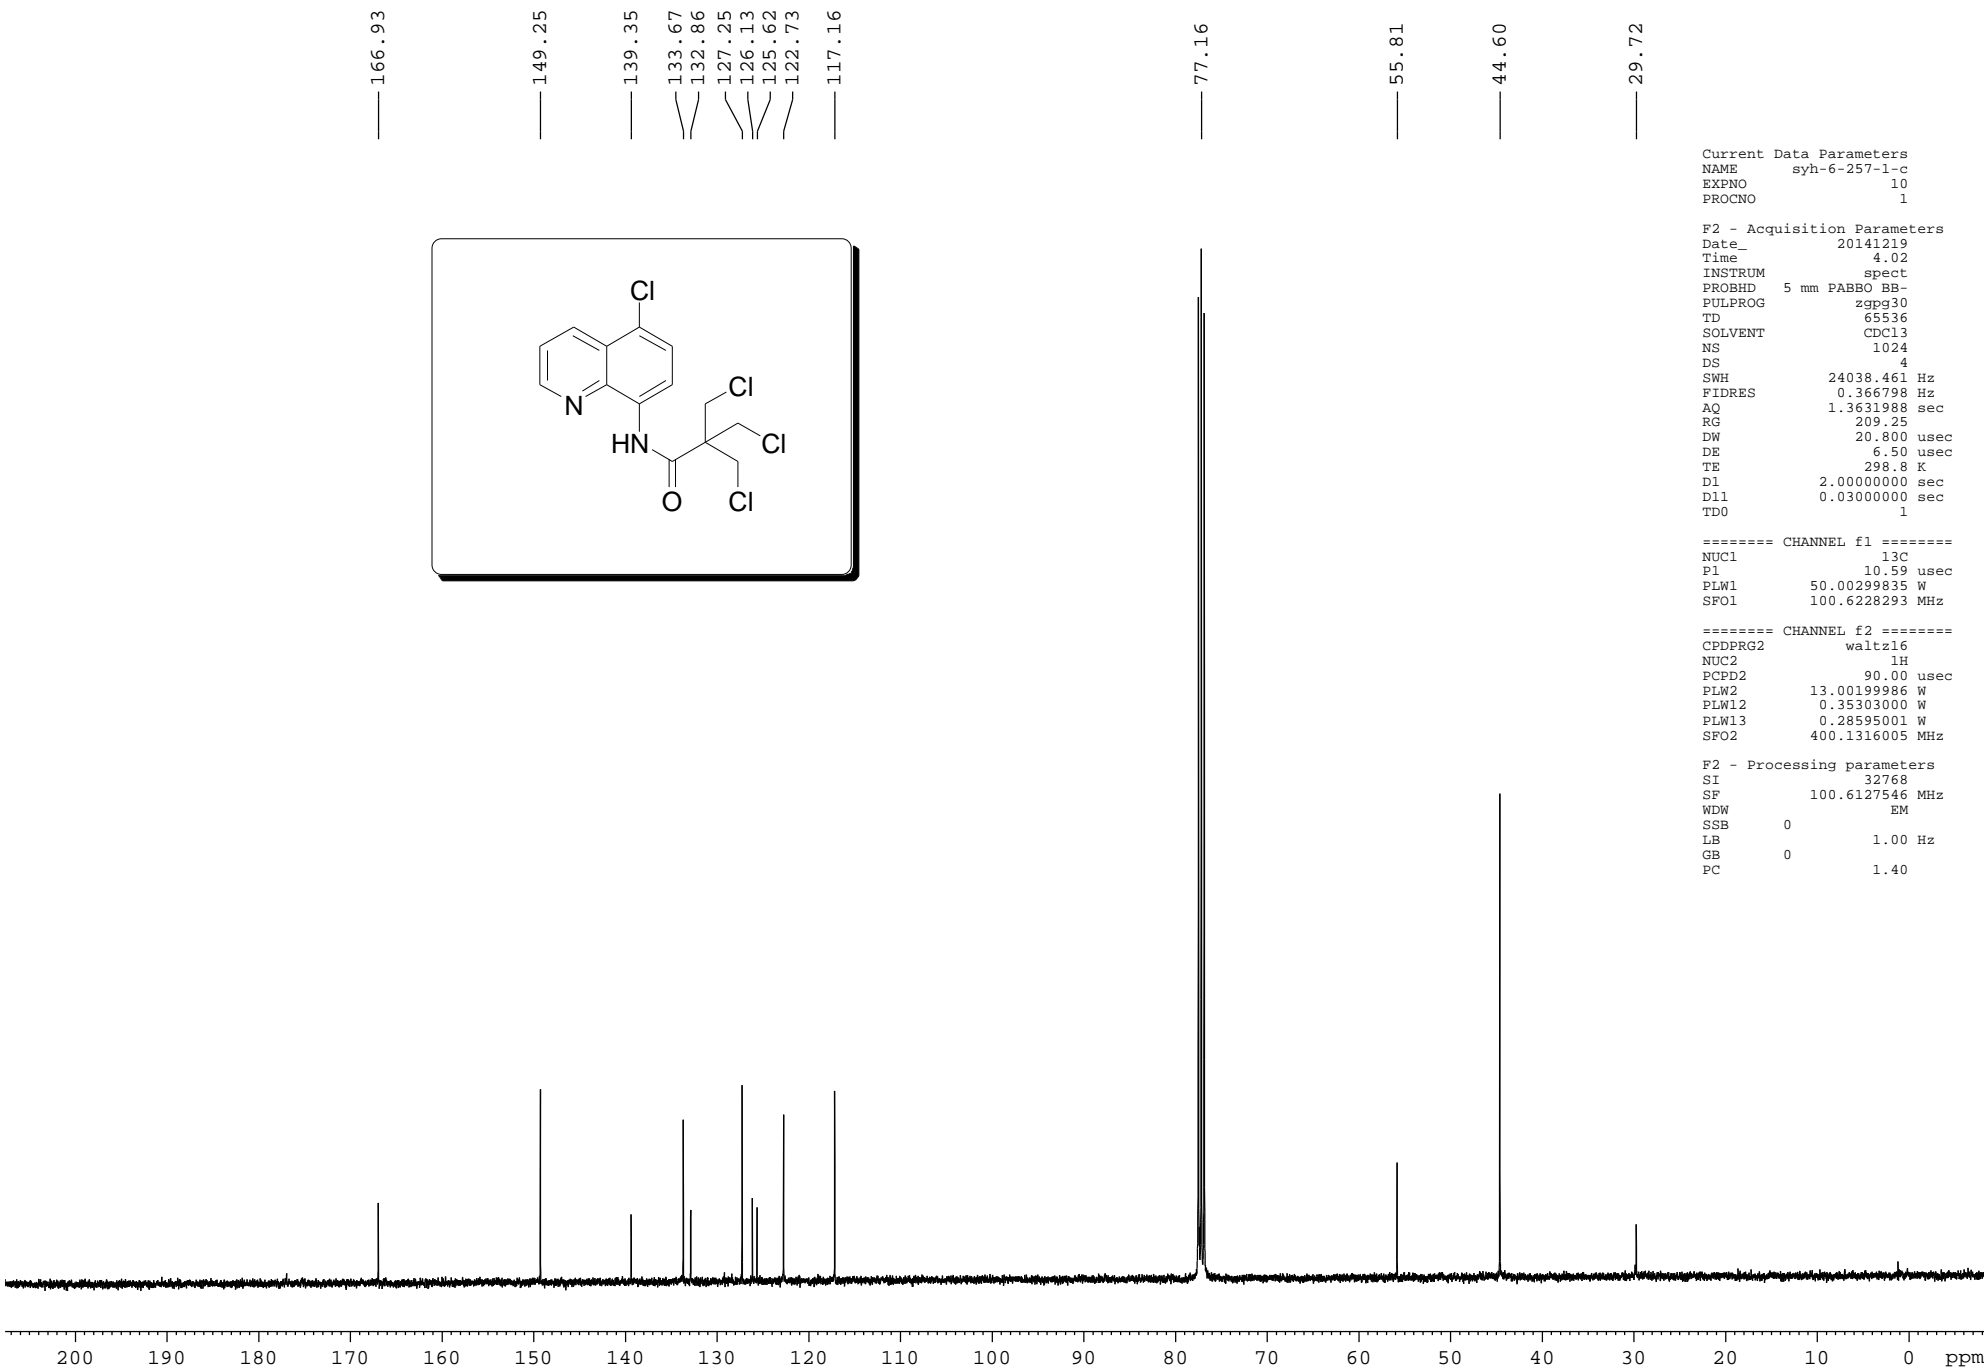

Current Data Parameters  
 NAME syh-6-257-1-c  
 EXPNO 10  
 PROCNO 1

F2 - Acquisition Parameters  
 Date\_ 20141219  
 Time 4.02  
 INSTRUM spect  
 PROBHD 5 mm PABBO BB-  
 PULPROG zgpg30  
 TD 65536  
 SOLVENT CDCl3  
 NS 1024  
 DS 4  
 SWH 24038.461 Hz  
 FIDRES 0.366798 Hz  
 AQ 1.3631988 sec  
 RG 209.25  
 DW 20.800 usec  
 DE 6.50 usec  
 TE 298.8 K  
 D1 2.0000000 sec  
 D11 0.0300000 sec  
 TD0 1

===== CHANNEL f1 =====  
 NUC1 13C  
 P1 10.59 usec  
 PLW1 50.00299835 W  
 SFO1 100.6228293 MHz

===== CHANNEL f2 =====  
 CPDPRG2 waltz16  
 NUC2 1H  
 PCPD2 90.00 usec  
 PLW2 13.00199986 W  
 PLW12 0.35303000 W  
 PLW13 0.28595001 W  
 SFO2 400.1316005 MHz

F2 - Processing parameters  
 SI 32768  
 SF 100.6127546 MHz  
 WDW EM  
 SSB 0  
 LB 1.00 Hz  
 GB 0  
 PC 1.40

Current Data Parameters  
NAME 3Q1-H  
EXPNO 10  
PROCNO 1

F2 - Acquisition Parameters

Date\_ 20150422  
Time 16.04  
INSTRUM spect  
PROBHD 5 mm PABBO BB/  
PULPROG zg30  
TD 65536  
SOLVENT CDCl3  
NS 16  
DS 2  
SWH 8012.820 Hz  
FIDRES 0.122266 Hz  
AQ 4.0894966 sec  
RG 60.76  
DW 62.400 usec  
DE 6.50 usec  
TE 297.0 K  
D1 1.00000000 sec  
TD0 1

==== CHANNEL f1 =====  
SFO1 400.1324710 MHz  
NUC1 1H  
P1 8.78 usec  
PLW1 19.00000000 W

F2 - Processing parameters

SI 65536  
SF 400.130098 MHz  
WDW EM  
SSB 0  
LB 0.30 Hz  
GB 0  
PC 1.00

10.353

8.879  
8.874  
8.868  
8.864  
8.794  
8.773  
8.573  
8.569  
8.552  
8.548  
7.614  
7.593  
7.583  
7.573  
7.562  
7.552  
7.260

3.765

2.313  
2.301  
2.288  
2.280  
2.268  
1.729  
1.710  
1.702  
1.694  
1.679  
1.673  
1.655  
1.645  
1.632  
1.621  
1.610  
1.597  
1.576  
1.569  
1.478  
1.464  
1.454  
1.443  
1.423

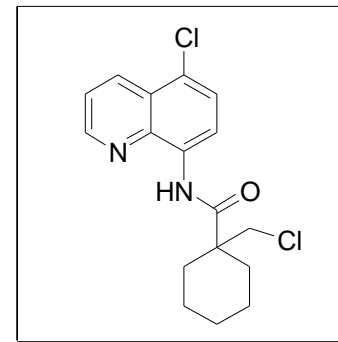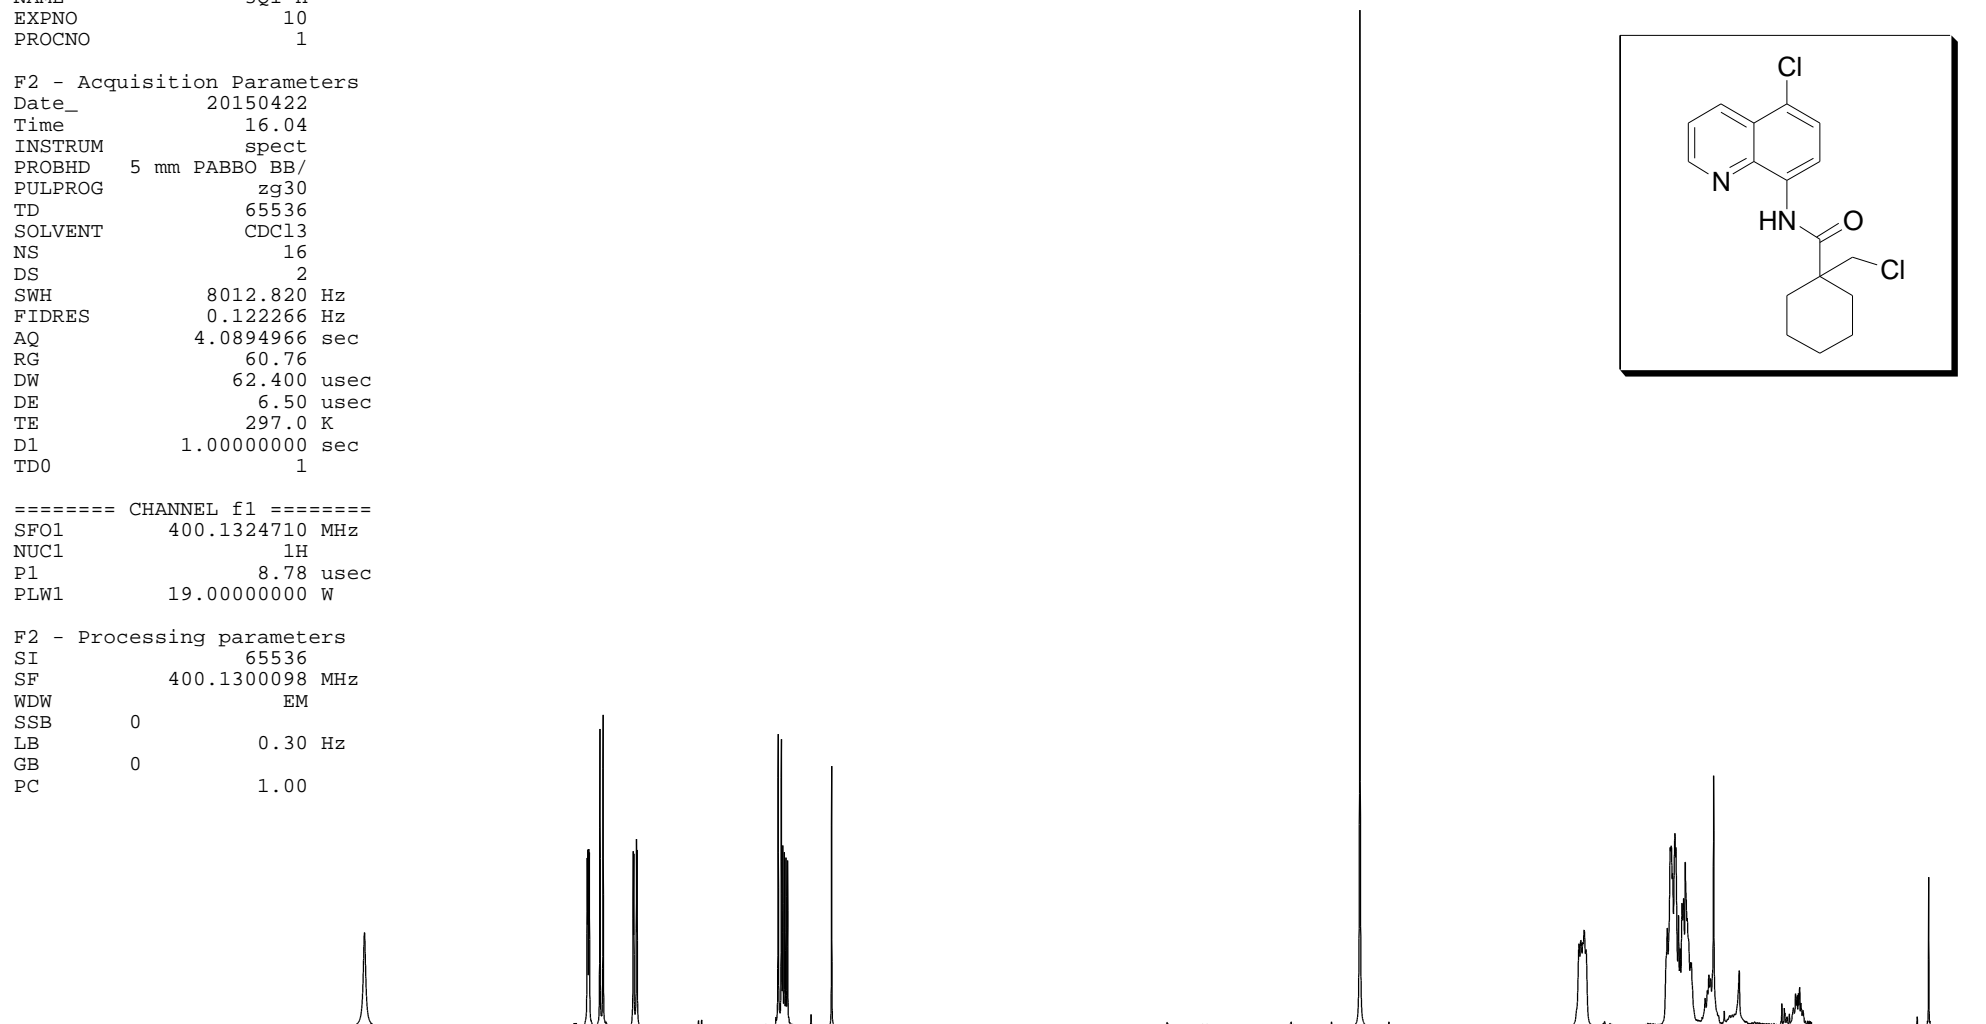

12 11 10 9 8 7 6 5 4 3 2 1 0 ppm

0.95  
1.00  
1.00  
2.06  
1.99  
2.04  
7.42  
1.35

— 172.70

— 149.00

— 139.55

— 133.66

— 133.49

— 127.35

— 126.07

— 124.57

— 122.46

— 116.58

— 51.90

— 49.75

— 32.33

— 25.81

— 22.69

Current Data Parameters

NAME 3Q1-C  
EXPNO 10  
PROCNO 1

F2 - Acquisition Parameters

Date\_ 20150422  
Time 18.04  
INSTRUM spect  
PROBHD 5 mm PABBO BB/  
PULPROG zgpg30  
TD 65536  
SOLVENT CDC13  
NS 518  
DS 4  
SWH 24038.461 Hz  
FIDRES 0.366798 Hz  
AQ 1.3631988 sec  
RG 202.1  
DW 20.800 usec  
DE 6.50 usec  
TE 297.6 K  
D1 2.00000000 sec  
d11 0.03000000 sec  
DELTA 1.89999998 sec  
TD0 1  
NUC1 13C  
P1 9.85 usec  
PLW1 65.00000000 W  
SFO1 100.6228293 MHz  
CPDPRG2  
NUC2 1H  
PLW2 19.00000000 W  
PLW12 0.18082000 W  
PLW13 0.14647000 W  
SFO2 400.1316005 MHz

F2 - Processing parameters

SI 32768  
SF 100.6127561 MHz  
WDW EM  
SSB 0  
LB 1.00 Hz  
GB 0  
PC 1.40

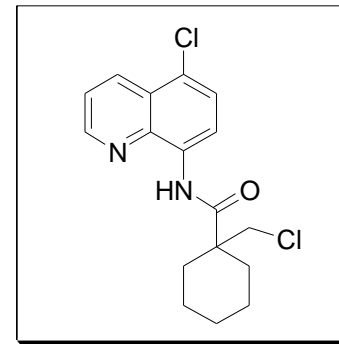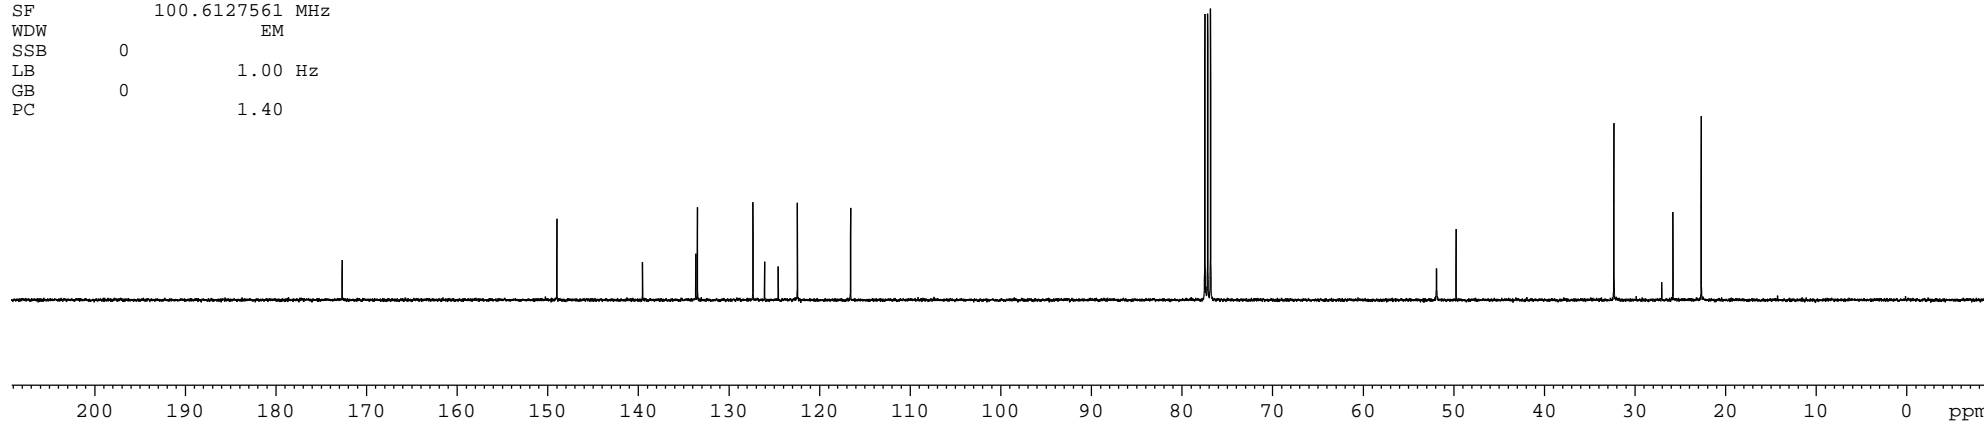

Current Data Parameters  
 NAME 3Q2-H  
 EXPNO 10  
 PROCNO 1

F2 - Acquisition Parameters

Date\_ 20150421  
 Time 22.08  
 INSTRUM spect  
 PROBHD 5 mm PABBO BB/  
 PULPROG zg30  
 TD 65536  
 SOLVENT CDCl3  
 NS 16  
 DS 2  
 SWH 8012.820 Hz  
 FIDRES 0.122266 Hz  
 AQ 4.0894966 sec  
 RG 60.76  
 DW 62.400 usec  
 DE 6.50 usec  
 TE 297.0 K  
 D1 1.00000000 sec  
 TD0 1

==== CHANNEL f1 =====  
 SFO1 400.1324710 MHz  
 NUC1 1H  
 P1 8.78 usec  
 PLW1 19.00000000 W

F2 - Processing parameters

SI 65536  
 SF 400.1300097 MHz  
 WDW EM  
 SSB 0  
 LB 0.30 Hz  
 GB 0  
 PC 1.00

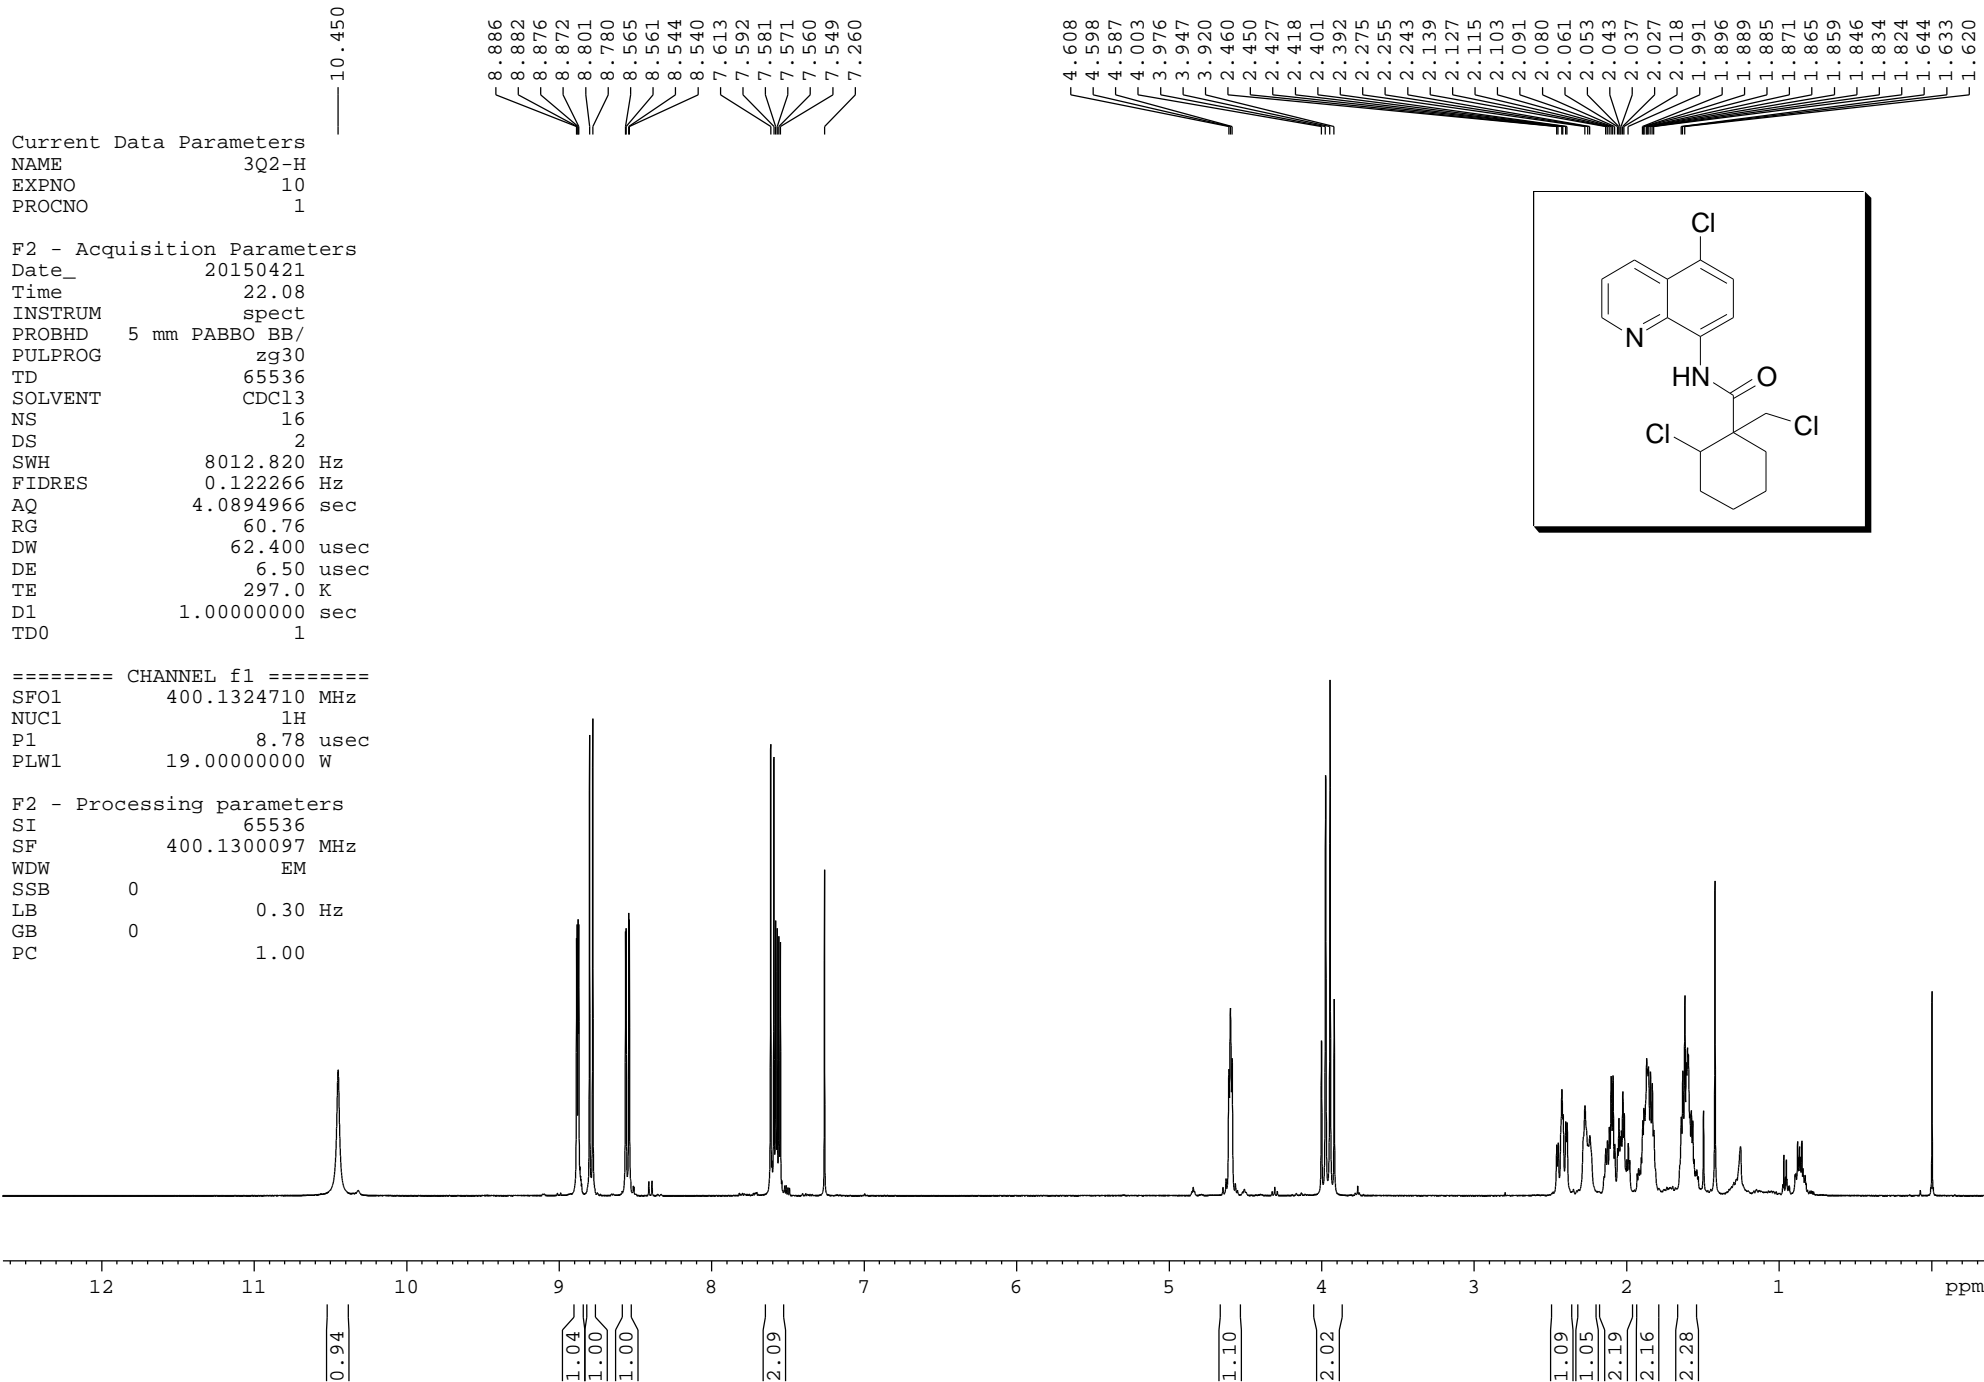

Current Data Parameters  
NAME 150421-zx-2-b-c  
EXPNO 10  
PROCNO 1

F2 - Acquisition Parameters  
Date\_ 20150421  
Time 23.46  
INSTRUM spect  
PROBHD 5 mm PABBO BB/  
PULPROG zgpg30  
TD 65536  
SOLVENT CDC13  
NS 520  
DS 4  
SWH 24038.461 Hz  
FIDRES 0.366798 Hz  
AQ 1.3631988 sec  
RG 202.1  
DW 20.800 usec  
DE 6.50 usec  
TE 297.1 K  
D1 2.00000000 sec  
d11 0.03000000 sec  
DELTA 1.89999998 sec  
TD0 1  
NUC1 13C  
P1 9.85 usec  
PLW1 65.00000000 W  
SFO1 100.6228293 MHz  
CPDPRG2  
NUC2 1H  
PLW2 19.00000000 W  
PLW12 0.18082000 W  
PLW13 0.14647000 W  
SFO2 400.1316005 MHz

F2 - Processing parameters  
SI 32768  
SF 100.6127571 MHz  
WDW EM  
SSB 0  
LB 1.00 Hz  
GB 0  
PC 1.40

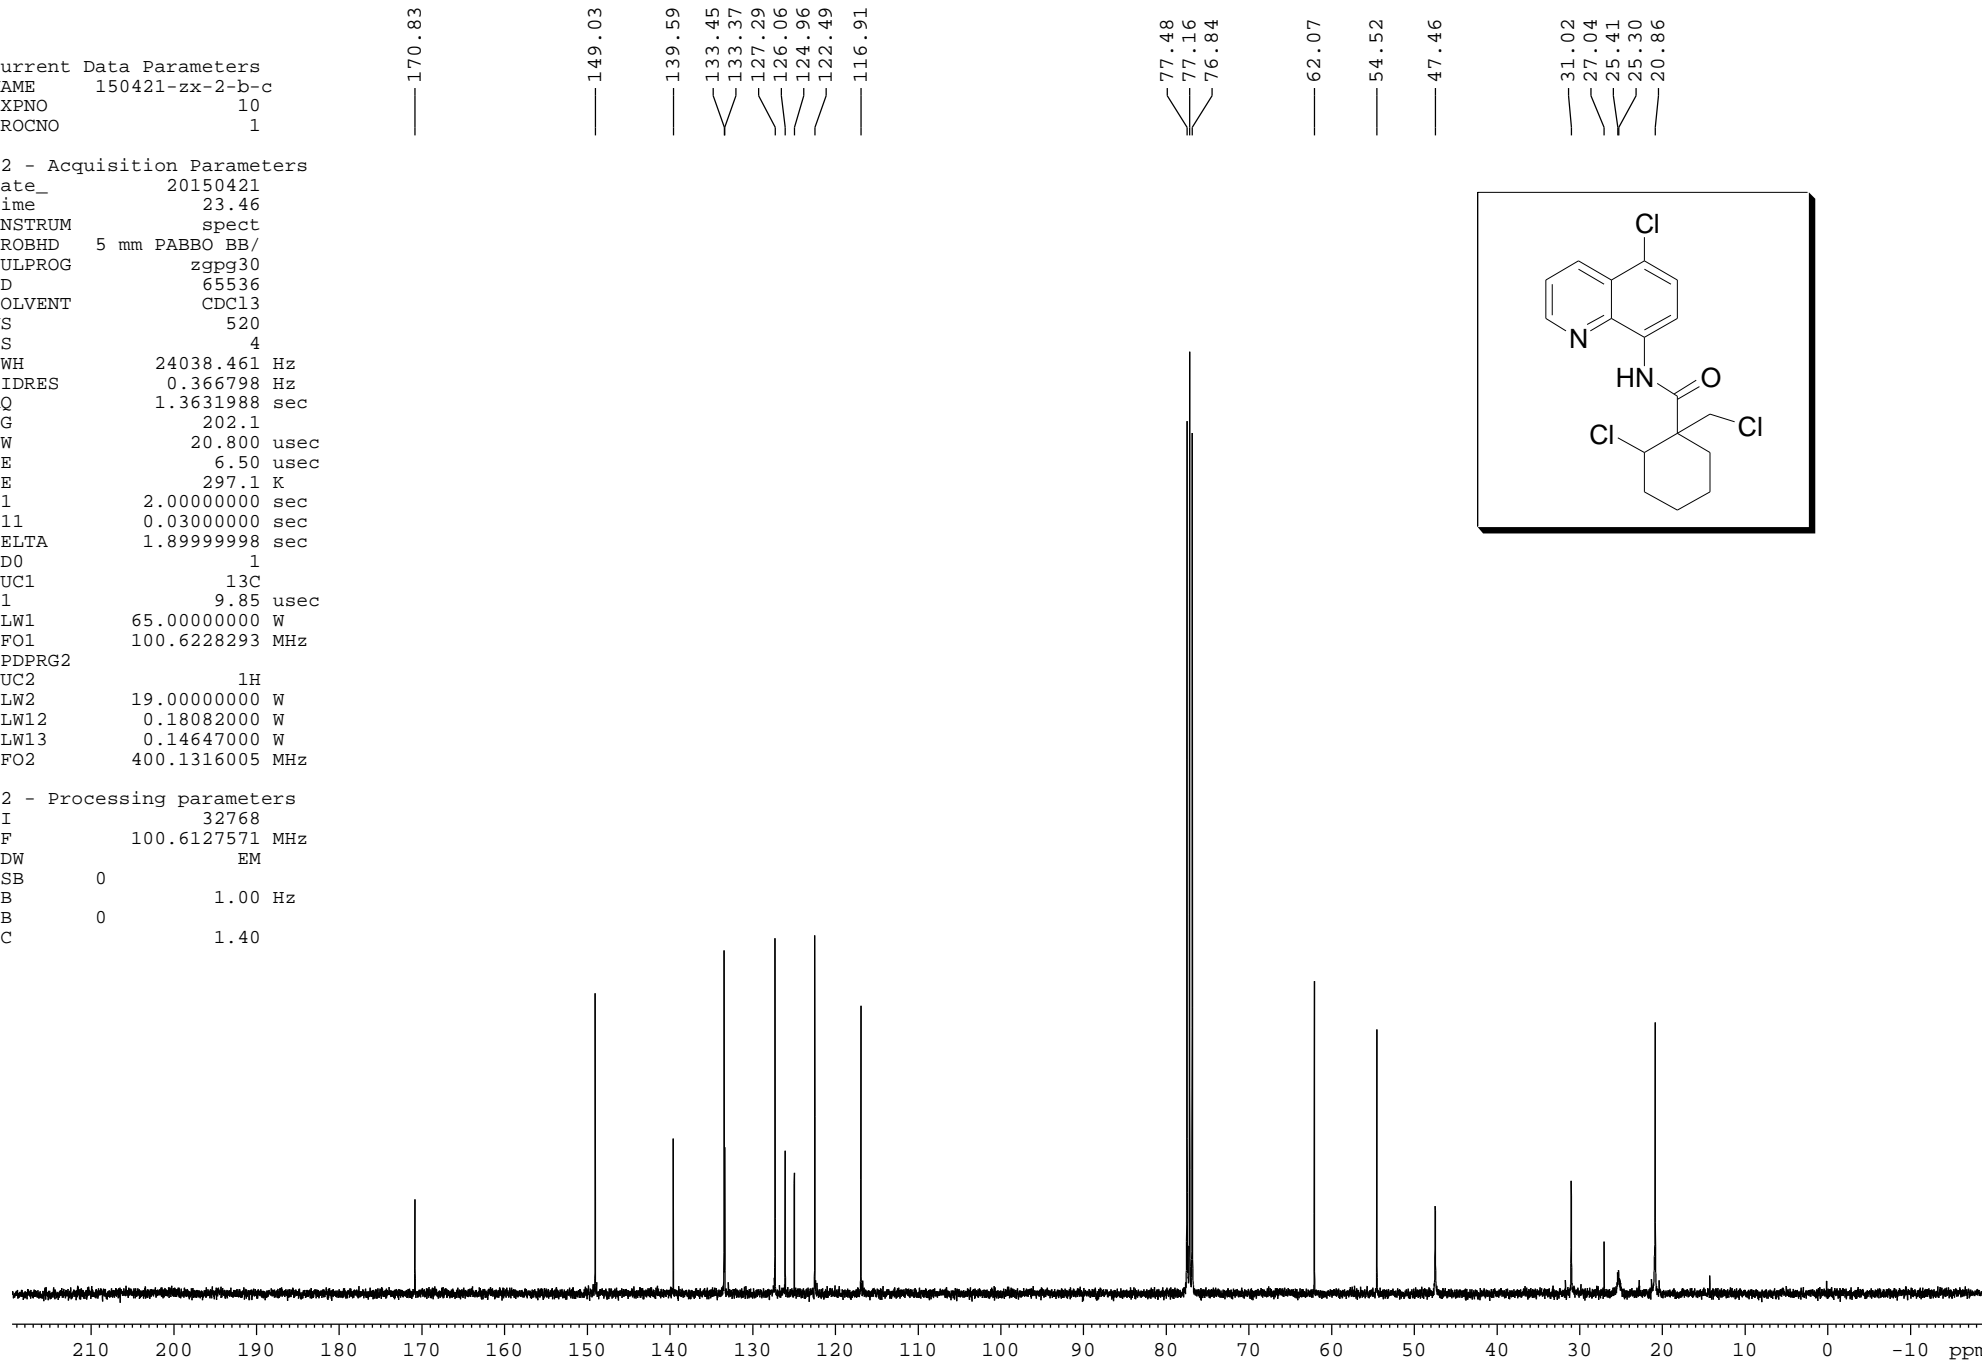

— 170.83

— 149.03

— 139.59

— 133.45

— 133.37

— 127.29

— 126.06

— 124.96

— 122.49

— 116.91

— 77.48

— 77.16

— 76.84

— 62.07

— 54.52

— 47.46

— 31.02

— 27.04

— 25.41

— 25.30

— 20.86



10.3191

8.8573  
8.8501  
8.8469  
8.6956  
8.6747  
8.5816  
8.5784  
8.5604  
8.5572  
7.6127  
7.5997  
7.5912  
7.5785  
7.5679  
7.2595  
6.9066  
6.8880  
6.6035  
6.5849  
6.5201

4.1050  
4.0739  
4.0437  
3.9840  
3.9693  
3.9547

2.2425  
2.1891  
2.1763  
2.1694  
2.1591  
2.1482  
2.0657  
1.9262  
1.9126  
1.9010  
1.8855

Current Data Parameters  
NAME YXL-9-171-C-H-20150309  
EXPNO 10  
PROCNO 1

F2 - Acquisition Parameters  
Date\_ 20150309  
Time 21.44  
INSTRUM spect  
PROBHD 5 mm PABBO BB-  
PULPROG zg30  
TD 65536  
SOLVENT CDCl3  
NS 16  
DS 2  
SWH 8223.685 Hz  
FIDRES 0.125483 Hz  
AQ 3.9846387 sec  
RG 63.51  
DW 60.800 usec  
DE 6.50 usec  
TE 0 K  
D1 1.00000000 sec  
TD0 1

==== CHANNEL f1 =====  
NUC1 1H  
P1 14.83 usec  
PLW1 13.00199986 W  
SFO1 400.1324710 MHz

F2 - Processing parameters  
SI 65536  
SF 400.1300100 MHz  
WDW EM  
SSB 0  
LB 0.30 Hz  
GB 0  
PC 1.00

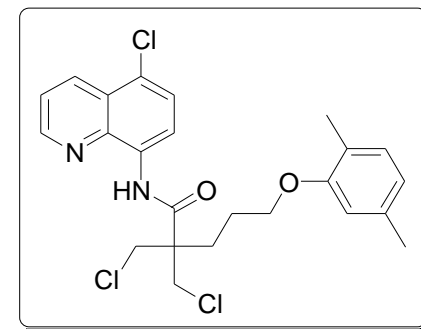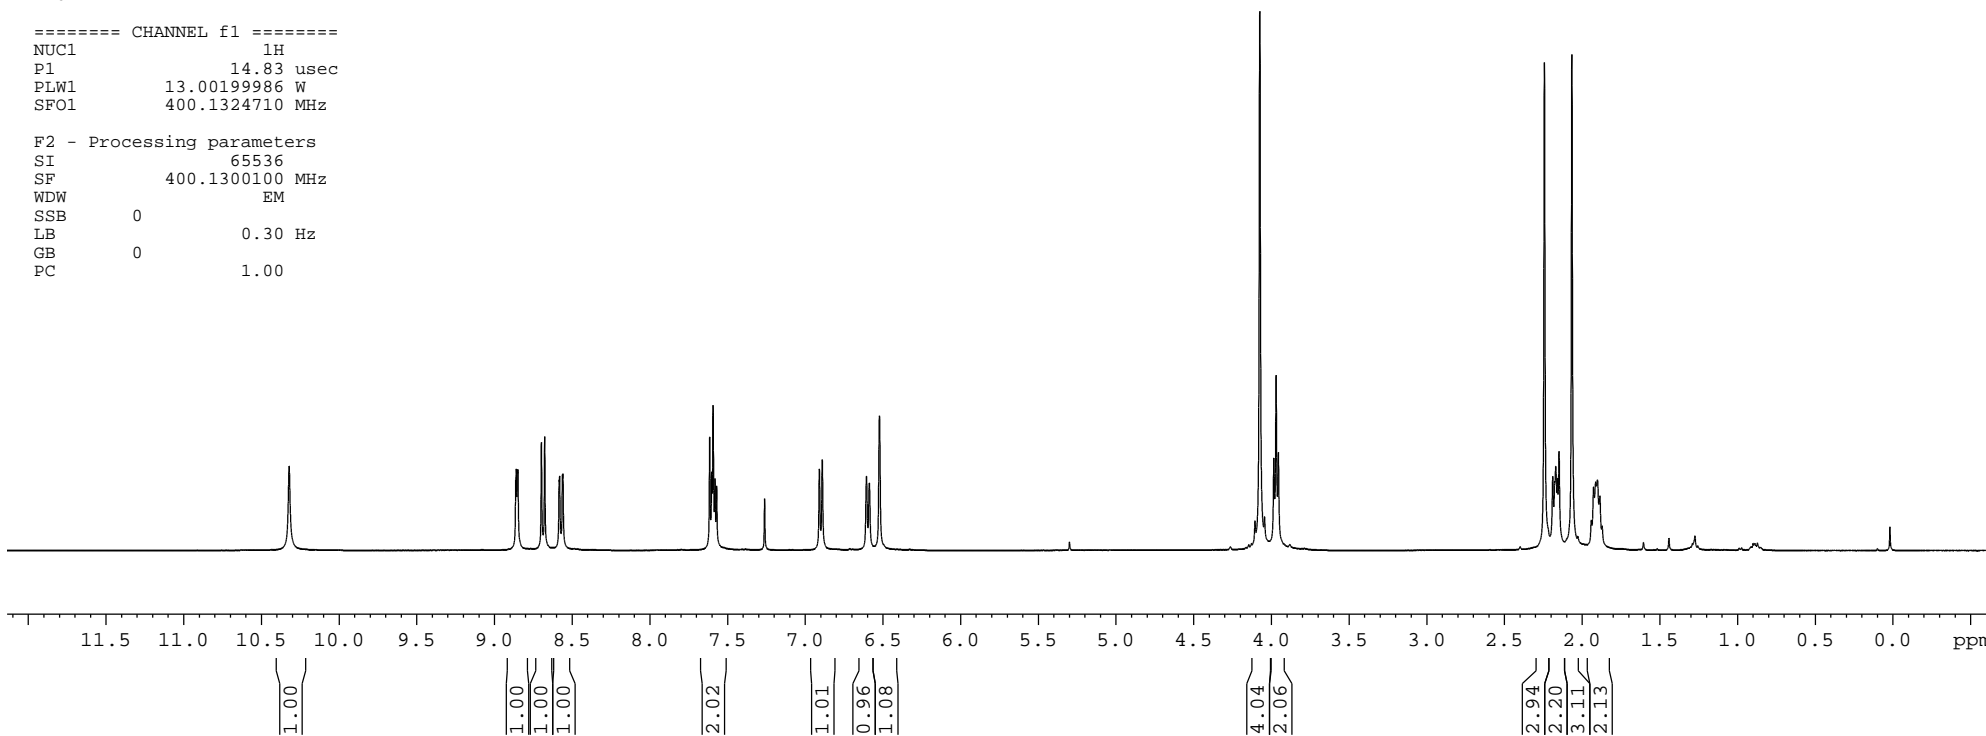

Current Data Parameters  
NAME YXL-9-171-C-C-20150309  
EXPNO 20  
PROCNO 1

F2 - Acquisition Parameters  
Date\_ 20150310  
Time 4.16  
INSTRUM spect  
PROBHD 5 mm PABBO BB-  
PULPROG zgpg30  
TD 65536  
SOLVENT CDCl3  
NS 200  
DS 4  
SWH 24038.461 Hz  
FIDRES 0.366798 Hz  
AQ 1.3631988 sec  
RG 209.25  
DW 20.800 usec  
DE 6.50 usec  
TE 0 K  
D1 2.00000000 sec  
D11 0.03000000 sec  
TD0 1

==== CHANNEL f1 =====  
NUC1 13C  
P1 10.59 usec  
PLW1 50.00299835 W  
SFO1 100.6228293 MHz

==== CHANNEL f2 =====  
CPDPRG2 waltz16  
NUC2 1H  
PCPD2 90.00 usec  
PLW2 13.00199986 W  
PLW12 0.35303000 W  
PLW13 0.28595001 W  
SFO2 400.1316005 MHz

F2 - Processing parameters  
SI 32768  
SF 100.6127578 MHz  
WDW EM  
SSB 0  
LB 1.00 Hz  
GB 0  
PC 1.40

— 169.65  
— 156.68  
— 149.06  
— 139.25  
— 136.51  
— 133.59  
— 133.08  
— 130.35  
— 127.22  
— 126.07  
— 125.10  
— 123.55  
— 122.60  
— 120.95  
— 116.74  
— 111.83

— 77.48  
— 77.16  
— 76.84

— 66.92

— 53.63

— 45.86

— 29.97

— 24.33

— 21.43

— 15.78

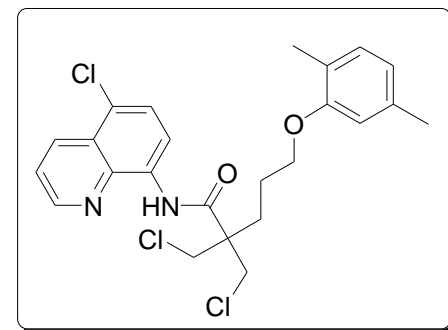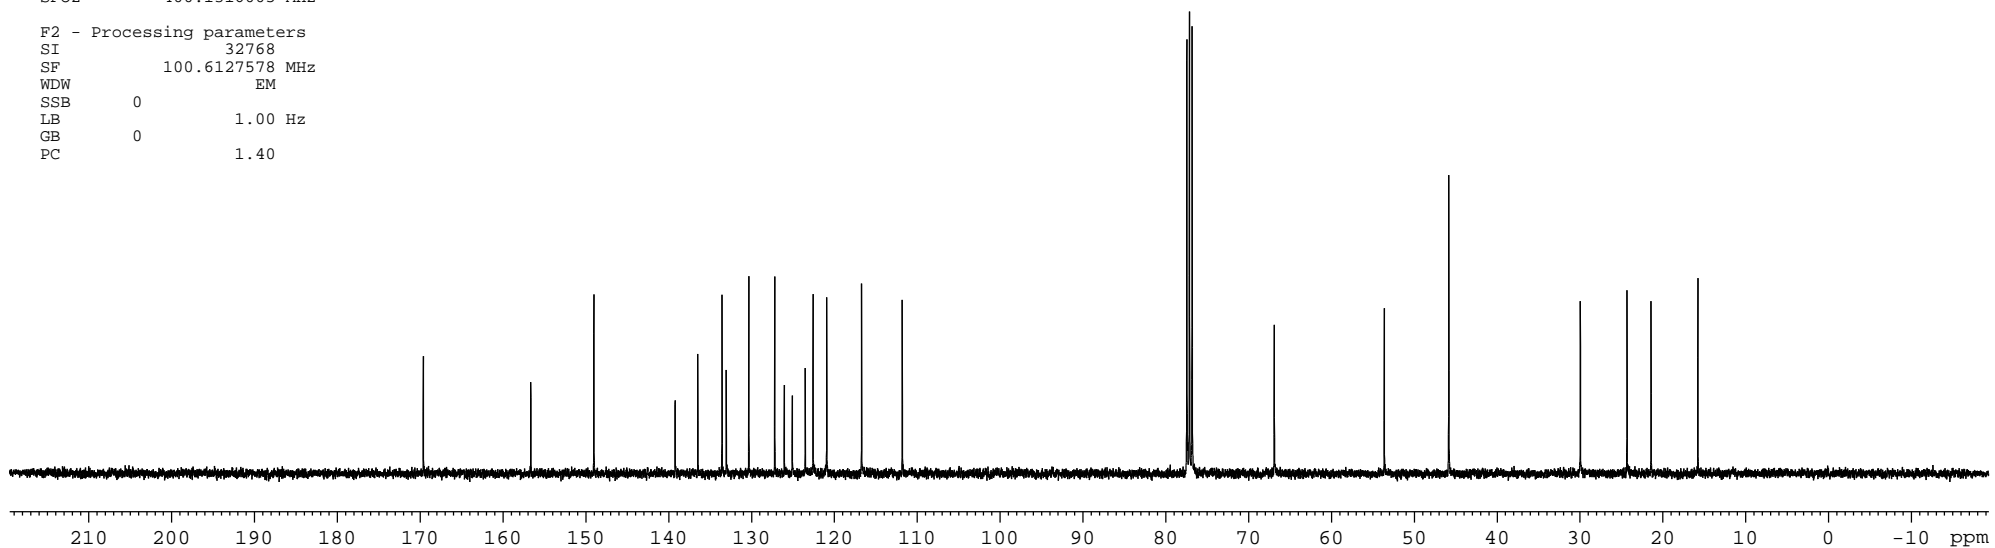

9.9782  
8.8144  
8.8107  
8.8039  
8.8003  
8.7511  
8.7301  
8.5548  
8.5511  
8.5335  
8.5298  
7.6078  
7.5868  
7.5605  
7.5499  
7.5373  
7.5328  
7.5288  
7.5161  
7.4929  
7.4721  
7.4528  
7.4352  
7.4160  
7.3850  
7.3666  
7.3597  
7.3551  
7.3498  
7.3310  
7.3274  
7.2601

4.3891  
4.3676  
4.3622  
4.3406  
4.1504  
4.1350  
4.1294  
4.1139  
3.9037  
3.8885  
3.8767  
3.8614

1.5842

Current Data Parameters  
NAME 20150412-zx-2-77  
EXPNO 20  
PROCNO 1

F2 - Acquisition Parameters  
Date\_ 20150412  
Time 14.42  
INSTRUM spect  
PROBHD 5 mm PABBO BB-  
PULPROG zg30  
TD 65536  
SOLVENT CDCl3  
NS 16  
DS 2  
SWH 8223.685 Hz  
FIDRES 0.125483 Hz  
AQ 3.9846387 sec  
RG 144.49  
DW 60.800 usec  
DE 6.50 usec  
TE 304.5 K  
D1 1.00000000 sec  
TD0 1

==== CHANNEL f1 =====  
NUC1 1H  
P1 14.83 usec  
PLW1 13.00199986 W  
SFO1 400.1324710 MHz

F2 - Processing parameters  
SI 65536  
SF 400.130096 MHz  
WDW EM  
SSB 0  
LB 0.30 Hz  
GB 0  
PC 1.00

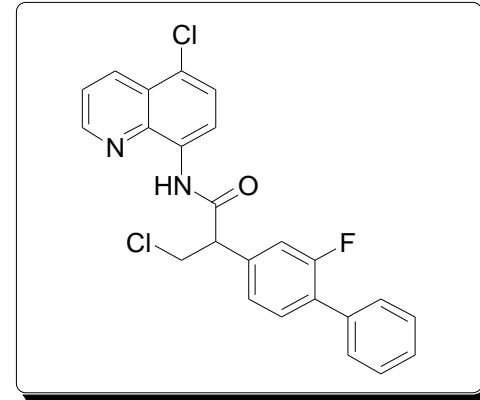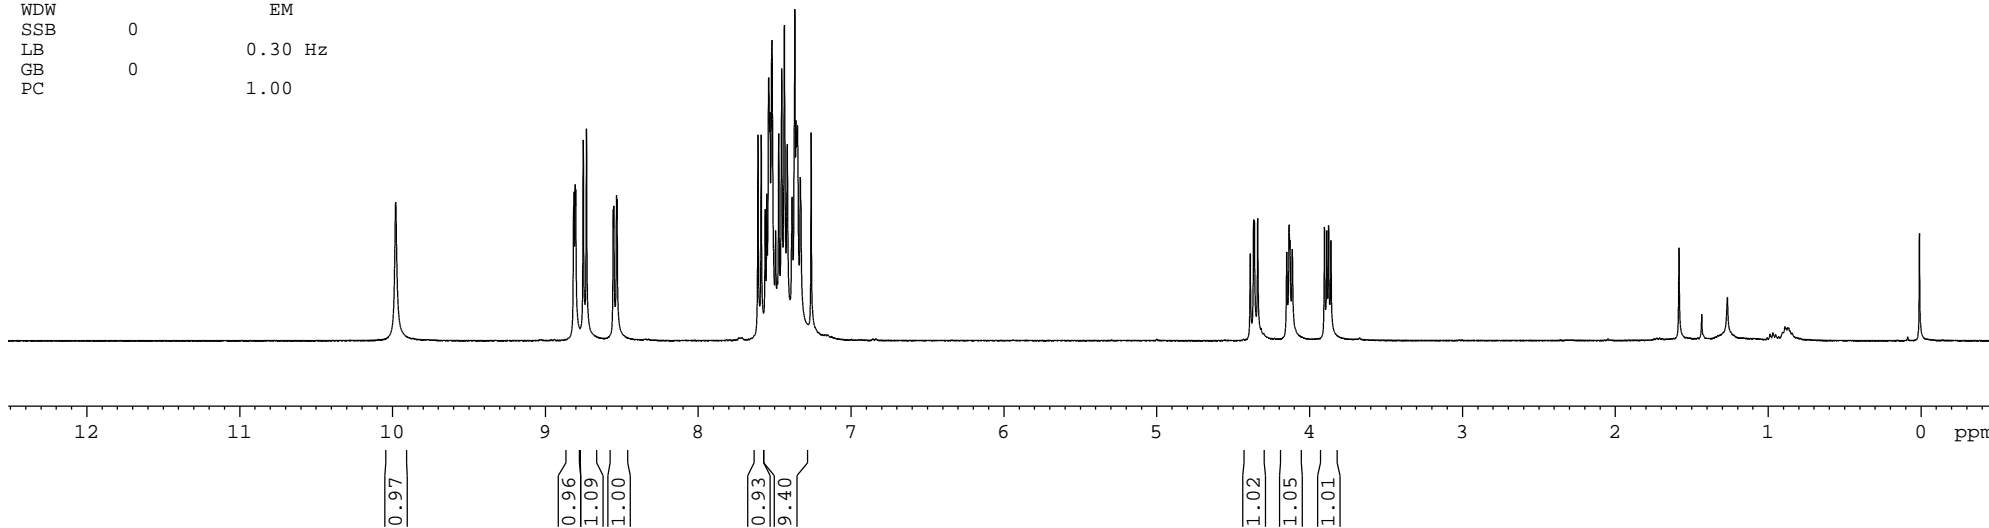

Current Data Parameters  
 NAME 20150412-zx-2-77c  
 EXPNO 10  
 PROCNO 1

F2 - Acquisition Parameters  
 Date\_ 20150412  
 Time\_ 16.37  
 INSTRUM spect  
 PROBHD 5 mm PABBO BB-  
 PULPROG zgpg30  
 TD 65536  
 SOLVENT CDCl3  
 NS 512  
 DS 4  
 SWH 24038.461 Hz  
 FIDRES 0.366798 Hz  
 AQ 1.3631988 sec  
 RG 209.25  
 DW 20.800 usec  
 DE 6.50 usec  
 TE 301.1 K  
 D1 2.00000000 sec  
 D11 0.03000000 sec  
 TD0 1

==== CHANNEL f1 =====  
 NUC1 13C  
 P1 10.59 usec  
 PLW1 50.00299835 W  
 SFO1 100.6228293 MHz

==== CHANNEL f2 =====  
 CPDPRG2 waltz16  
 NUC2 1H  
 PCPD2 90.00 usec  
 PLW2 13.00199986 W  
 PLW12 0.35303000 W  
 PLW13 0.28595001 W  
 SFO2 400.1316005 MHz

F2 - Processing parameters  
 SI 32768  
 SF 100.6127542 MHz  
 WDW EM  
 SSB 0  
 LB 1.00 Hz  
 GB 0  
 PC 1.40

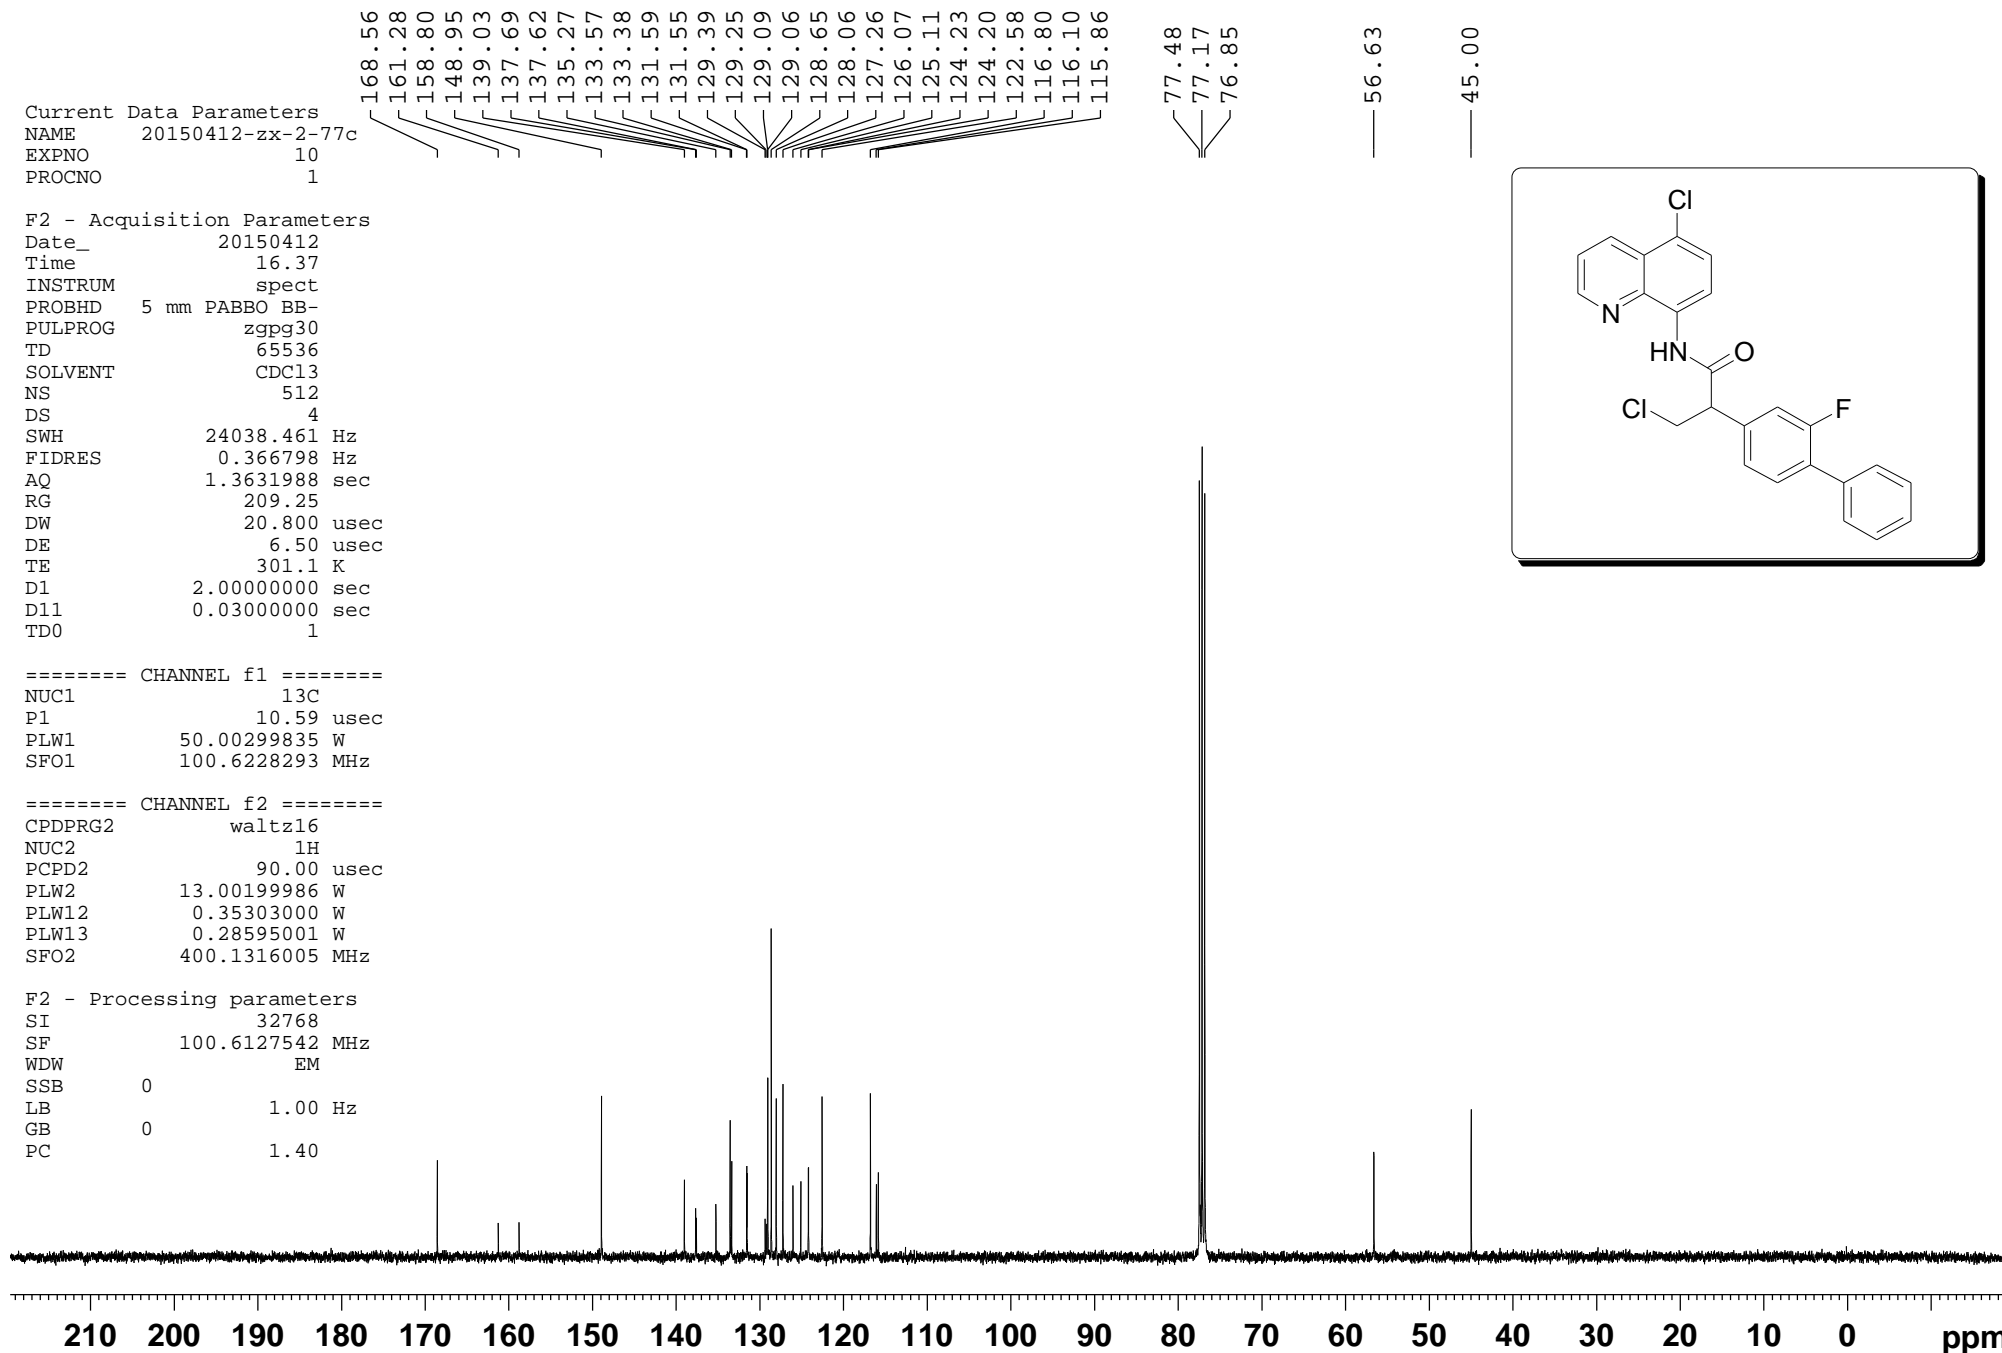

77.48  
 77.17  
 76.85

56.63

45.00

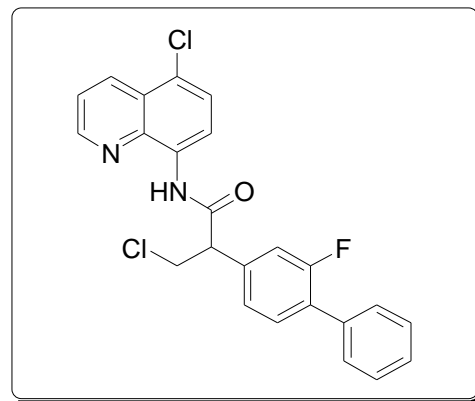

9.9538  
 8.7978  
 8.7938  
 8.7872  
 8.7832  
 8.7232  
 8.7021  
 8.5616  
 8.5576  
 8.5403  
 8.5363  
 8.794  
 8.787  
 8.783  
 8.723  
 8.702  
 8.8077  
 8.7901  
 8.7867  
 8.7765  
 8.7722  
 8.7573  
 8.7531  
 8.6037  
 8.5922  
 8.5827  
 8.5736  
 8.5691  
 8.5584  
 8.5477  
 8.5433  
 8.5371  
 8.5239  
 8.4685  
 8.4487  
 8.4300  
 8.2600  
  
 4.3866  
 4.3656  
 4.3596  
 4.3386  
 4.1984  
 4.1826  
 4.1775  
 4.1617  
 3.9072  
 3.8915  
 3.8801  
 3.8644

Current Data Parameters  
 NAME YXL-9-299-CL-H-150416  
 EXPNO 20  
 PROCNO 1

F2 - Acquisition Parameters

Date\_ 20150416  
 Time 20.49  
 INSTRUM spect  
 PROBHD 5 mm PABBO BB/  
 PULPROG zg30  
 TD 65536  
 SOLVENT CDCl3  
 NS 16  
 DS 2  
 SWH 8012.820 Hz  
 FIDRES 0.122266 Hz  
 AQ 4.0894465 sec  
 RG 128.61  
 DW 62.400 usec  
 DE 6.50 usec  
 TE 297.0 K  
 D1 1.0000000 sec  
 TD0 1

===== CHANNEL f1 =====  
 SFO1 400.1324710 MHz  
 NUC1 1H  
 P1 8.78 usec  
 PLW1 19.00000000 W

F2 - Processing parameters  
 SI 65536  
 SF 400.1300097 MHz  
 WDW EM  
 SSB 0  
 LB 0.30 Hz  
 GB 0  
 PC 1.00

8.798  
 8.794  
 8.787  
 8.783  
 8.723  
 8.702  
 8.562  
 8.558  
 8.540  
 8.536  
  
 7.942  
 7.938  
 7.934  
 7.811  
 7.808  
 7.790  
 7.787  
 7.777  
 7.772  
 7.757  
 7.753  
 7.604  
 7.592  
 7.583  
 7.574  
 7.569  
 7.558  
 7.548  
 7.543  
 7.537

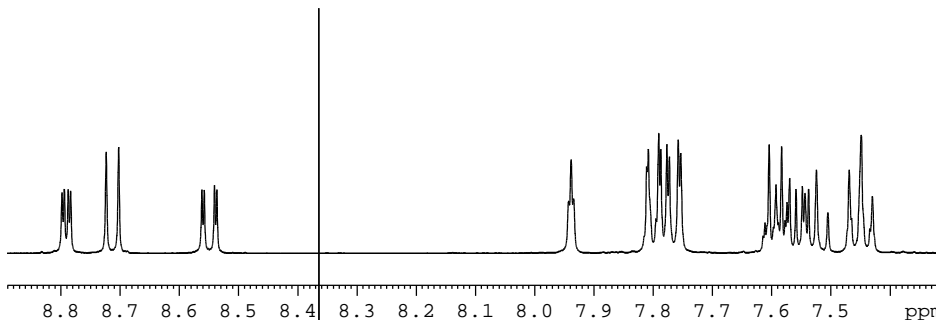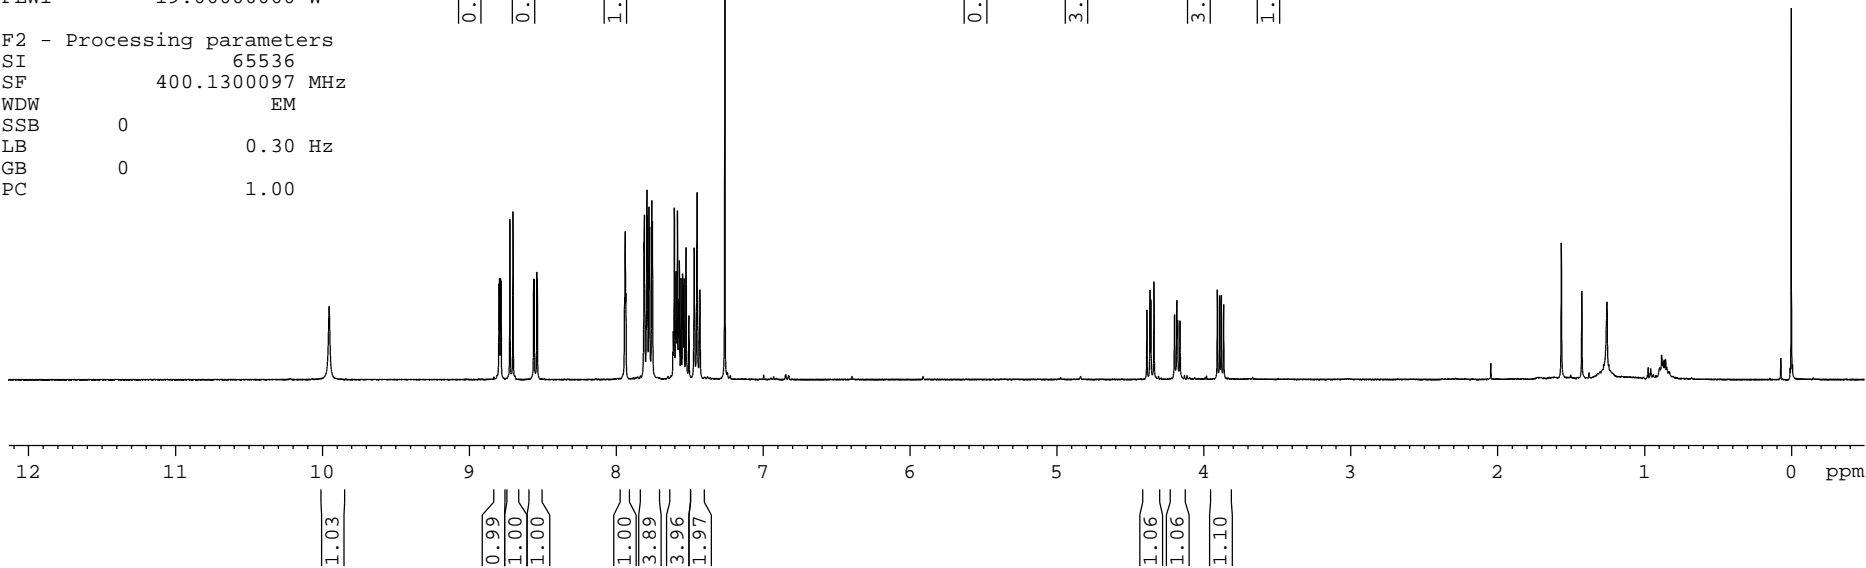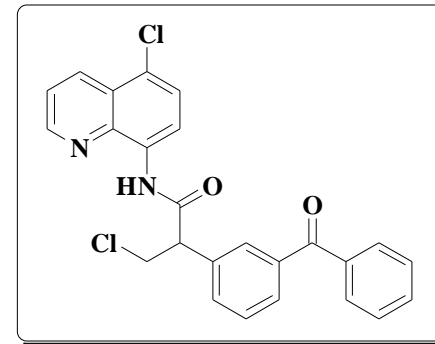

196.28  
 168.67  
 Current Data Parameters  
 NAME YXL-9-299-CL-C-150416  
 EXPNO 11  
 PROCNO 1

F2 - Acquisition Parameters  
 Date\_ 20150417  
 Time 8.51  
 INSTRUM spect  
 PROBHD 5 mm PABBO BB/  
 PULPROG zgpg30  
 TD 65536  
 SOLVENT CDCl3  
 NS 1300  
 DS 4  
 SWH 24038.461 Hz  
 FIDRES 0.366798 Hz  
 AQ 1.3631488 sec  
 RG 202.1  
 DW 20.800 usec  
 DE 6.50 usec  
 TE 297.0 K  
 D1 2.0000000 sec  
 D11 0.03000000 sec  
 TD0 1

===== CHANNEL f1 =====  
 SFO1 100.6228293 MHz  
 NUC1 13C  
 P1 9.85 usec  
 PLW1 65.0000000 W

===== CHANNEL f2 =====  
 SFO2 400.1316005 MHz  
 NUC2 1H  
 CPDPRG[2] waltz16  
 PCPD2 90.00 usec  
 PLW2 19.0000000 W  
 PLW12 0.18082000 W  
 PLW13 0.14647000 W

F2 - Processing parameters  
 SI 32768  
 SF 100.6127549 MHz  
 WDW EM  
 SSB 0  
 LB 1.00 Hz  
 GB 0  
 PC 1.40

148.97  
 139.01  
 138.54  
 137.39  
 136.91  
 133.58  
 133.34  
 132.84  
 131.82  
 130.26  
 130.07  
 129.36  
 128.52  
 127.24  
 126.05  
 125.11  
 122.61  
 116.75

77.48  
 77.16  
 76.84  
 56.91  
 45.09

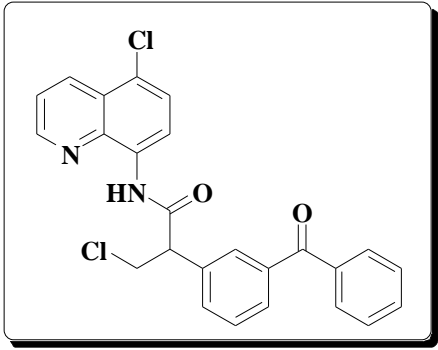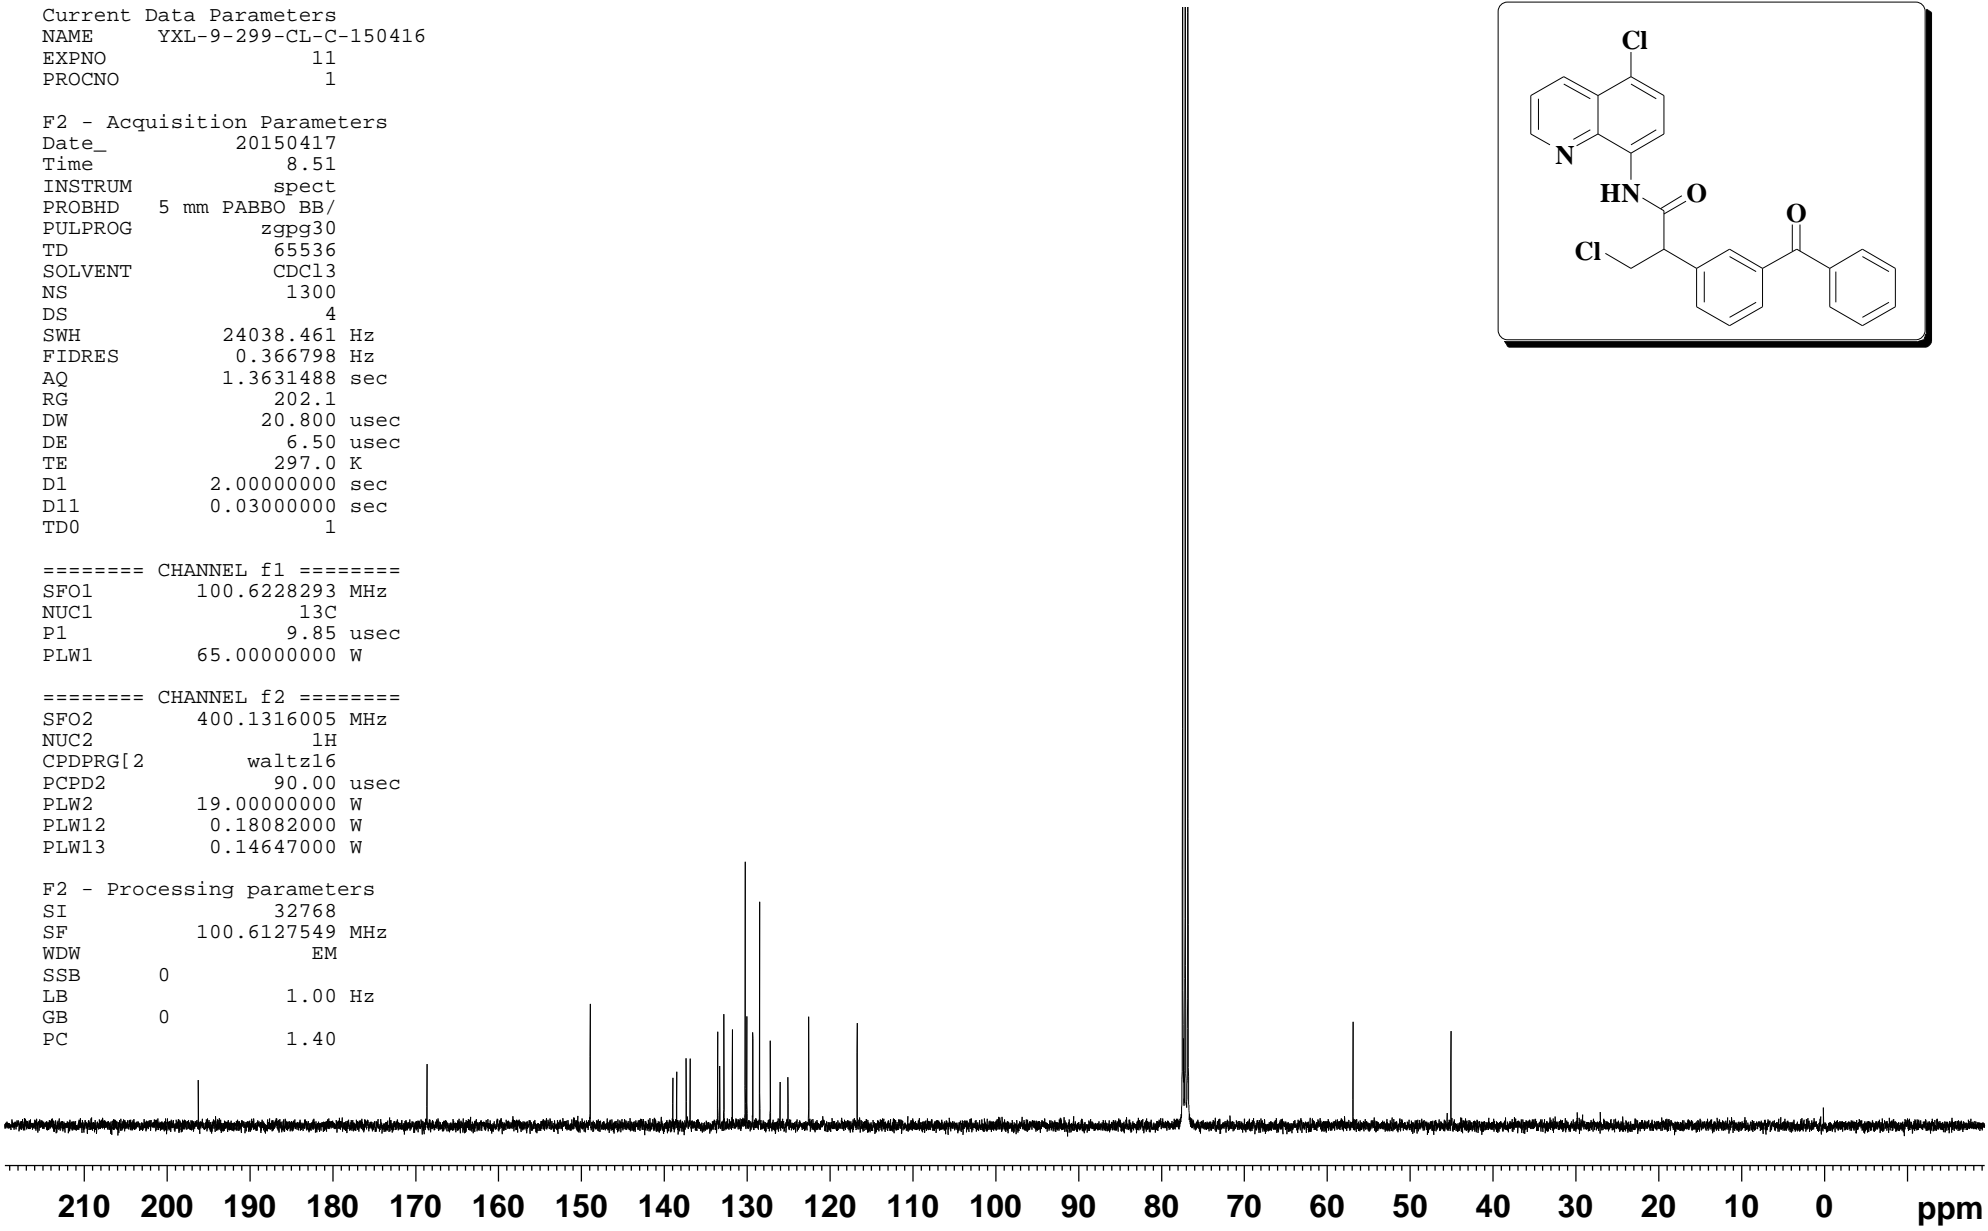

Current Data Parameters  
 NAME YXL-9-219-C-H-20150324  
 EXPNO 10  
 PROCNO 1

F2 - Acquisition Parameters  
 Date\_ 20150324  
 Time 10.58  
 INSTRUM spect  
 PROBHD 5 mm PABBO BB-  
 PULPROG zg30  
 TD 65536  
 SOLVENT CDC13  
 NS 16  
 DS 2  
 SWH 8223.685 Hz  
 FIDRES 0.125483 Hz  
 AQ 3.9846387 sec  
 RG 70.24  
 DW 60.800 usec  
 DE 6.50 usec  
 TE 298.5 K  
 D1 1.00000000 sec  
 TD0 1

==== CHANNEL f1 =====  
 NUC1 1H  
 P1 14.83 usec  
 PLW1 13.00199986 W  
 SFO1 400.1324710 MHz

F2 - Processing parameters  
 SI 65536  
 SF 400.1300100 MHz  
 WDW EM  
 SSB 0  
 LB 0.30 Hz  
 GB 0  
 PC 1.00

8.8582  
8.8479  
8.8268  
8.8057  
8.5710  
8.5498  
7.6162  
7.5952  
7.5797  
7.5692  
7.5585  
7.5480  
7.2597  
7.2313  
7.2107  
7.0513  
7.0312  
6.8596

4.3616  
4.3325  
4.2314  
4.2023  
2.8843  
2.8727  
2.8626  
2.8549  
2.8374  
2.8198  
2.8026  
2.5716  
2.5397  
2.4918  
2.4656  
2.3871  
2.3554  
2.0040  
1.9645  
1.9394  
1.9320  
1.9208  
1.9091  
1.8871  
1.8766  
1.8236  
1.7891  
1.7579  
1.7280  
1.4363  
1.3389  
1.2670  
1.2240  
1.2068

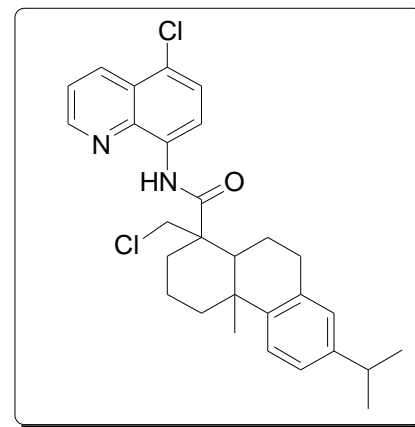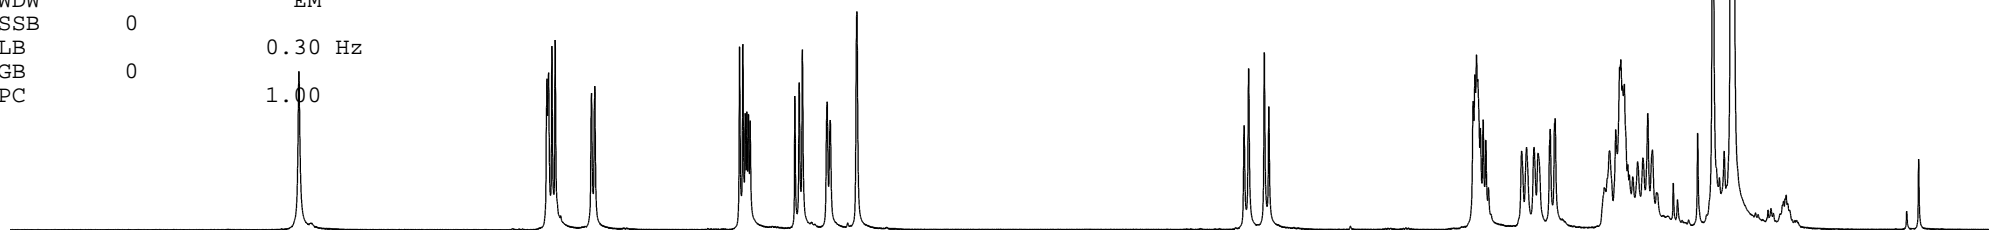

12.0 11.5 11.0 10.5 10.0 9.5 9.0 8.5 8.0 7.5 7.0 6.5 6.0 5.5 5.0 4.5 4.0 3.5 3.0 2.5 2.0 1.5 1.0 0.5 0.0 ppm

1.01 2.04 1.03 2.06 1.06 1.01 1.00 0.97 1.09 3.07 2.01 1.10 6.56 3.20 6.37

172.80

148.94  
146.50  
146.30  
139.51  
134.47  
133.94  
133.48  
127.34  
127.04  
126.04  
124.49  
124.31  
124.26  
122.44  
116.73

77.48  
77.16  
76.84

54.16  
47.70  
44.62  
38.31  
37.87  
33.59  
32.24  
30.24  
26.29  
24.09  
24.06  
20.51  
18.72

Current Data Parameters  
NAME YXL-9-219-C-C-20150324  
EXPNO 10  
PROCNO 1

F2 - Acquisition Parameters

Date\_ 20150324  
Time 14.29  
INSTRUM spect  
PROBHD 5 mm PABBO BB-  
PULPROG zgpg30  
TD 65536  
SOLVENT CDCl3  
NS 460  
DS 4  
SWH 24038.461 Hz  
FIDRES 0.366798 Hz  
AQ 1.3631988 sec  
RG 209.25  
DW 20.800 usec  
DE 6.50 usec  
TE 299.0 K  
D1 2.00000000 sec  
D11 0.03000000 sec  
TD0 1

==== CHANNEL f1 =====

NUC1 13C  
P1 10.59 usec  
PLW1 50.00299835 W  
SFO1 100.6228293 MHz

==== CHANNEL f2 =====

CPDPRG2 waltz16  
NUC2 1H  
PCPD2 90.00 usec  
PLW2 13.00199986 W  
PLW12 0.35303000 W  
PLW13 0.28595001 W  
SFO2 400.1316005 MHz

F2 - Processing parameters

SI 32768  
SF 100.6127566 MHz  
WDW EM  
SSB 0  
LB 1.00 Hz  
GB 0  
PC 1.40

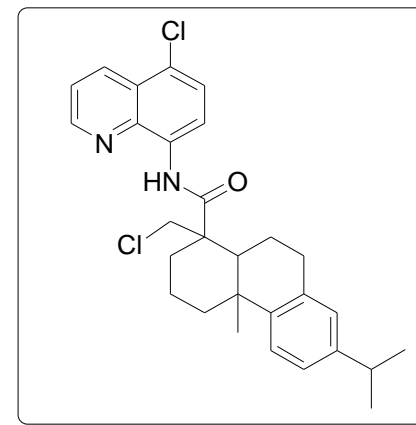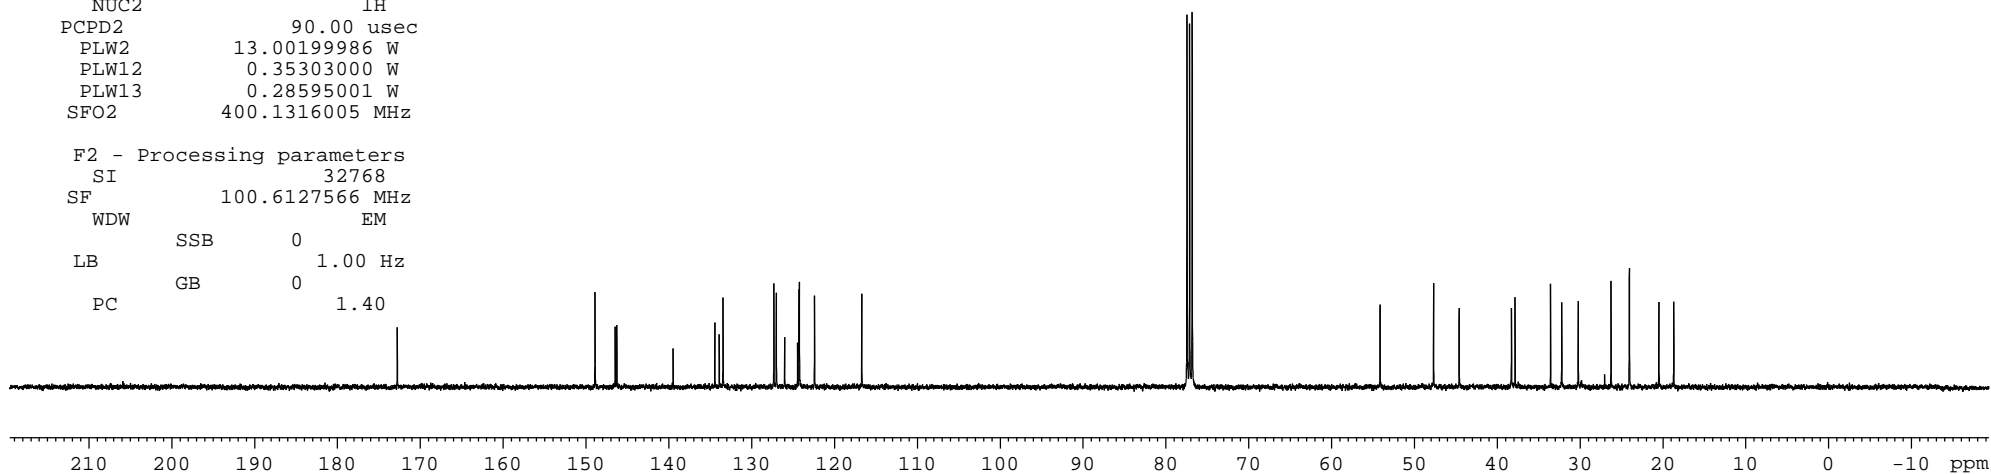



Current Data Parameters  
NAME YXL-9-255-H-20150401  
EXPNO 10  
PROCNO 1

F2 - Acquisition Parameters  
Date\_ 20150401  
Time 14.31  
INSTRUM spect  
PROBHD 5 mm PABBO BB-  
PULPROG zg30  
TD 65536  
SOLVENT CDCl3  
NS 16  
DS 2  
SWH 8223.685 Hz  
FIDRES 0.125483 Hz  
AQ 3.9846387 sec  
RG 165.63  
DW 60.800 usec  
DE 6.50 usec  
TE 300.6 K  
D1 1.00000000 sec  
TD0 1

==== CHANNEL f1 =====  
NUC1 1H  
P1 14.83 usec  
PLW1 13.00199986 W  
SFO1 400.1324710 MHz

F2 - Processing parameters  
SI 65536  
SF 400.1300102 MHz  
WDW EM  
SSB 0  
LB 0.30 Hz  
GB 0  
PC 1.00

9.8548

8.8527  
8.8455  
8.8426  
8.7323  
8.7114  
8.5781  
8.5750  
8.5568  
8.5538  
7.6066  
7.5861  
7.5779  
7.5670  
7.5564  
7.2588

4.6791  
4.6628  
4.6462  
4.6289  
4.6124  
4.5961

3.0351  
3.0153  
2.9978  
2.9780  
2.9681  
2.9540  
2.9307  
2.9166

1.6847  
1.6683

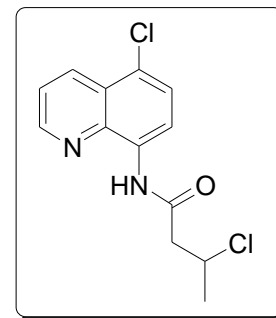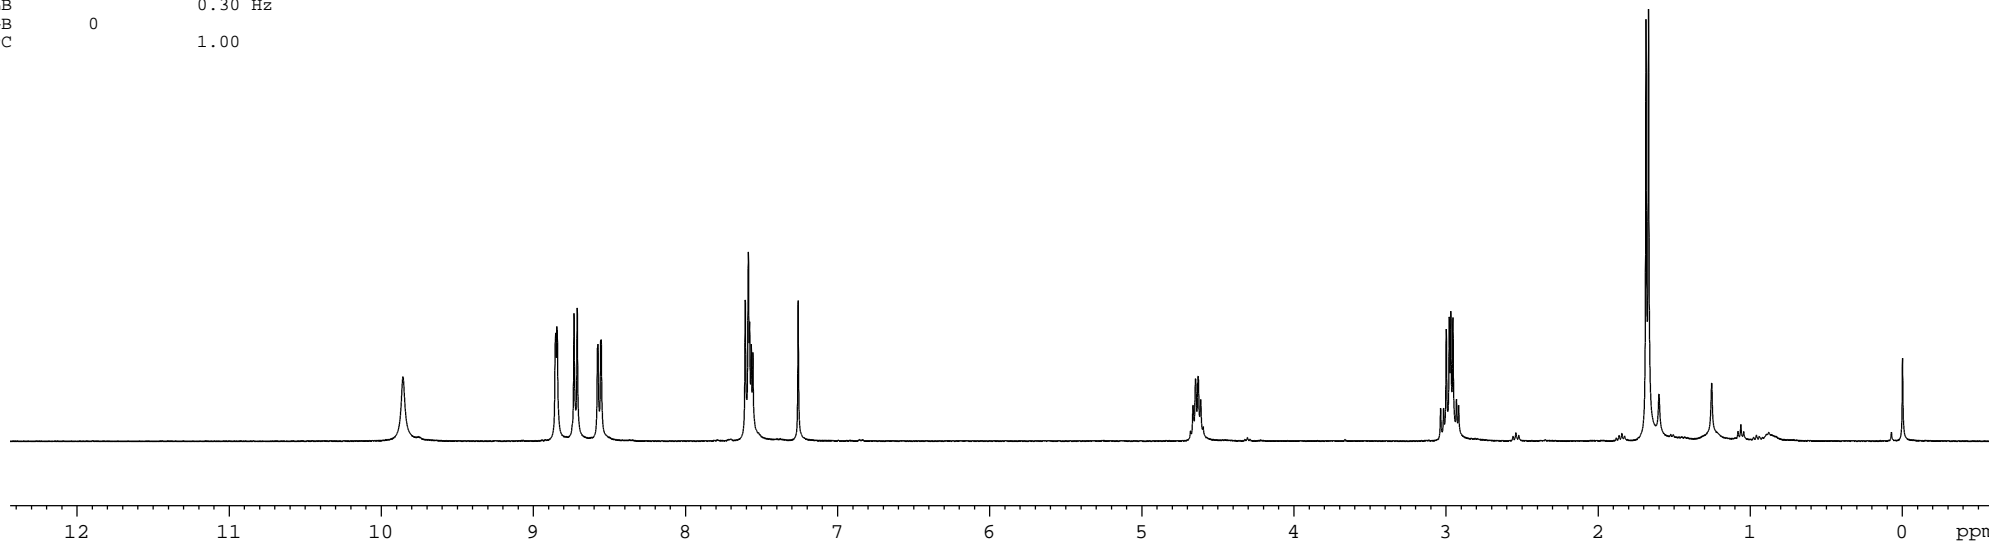

1.04

0.99

1.03

1.00

2.14

0.99

2.06

2.94

— 167.98  
 — 148.88  
 — 139.03  
 133.58  
 133.55  
 127.32  
 126.08  
 124.81  
 122.54  
 — 116.75  
 77.48  
 77.16  
 76.84  
 — 53.73  
 — 48.83  
 — 25.34

Current Data Parameters  
 NAME YXL-9-255-C-20150401  
 EXPNO 10  
 PROCNO 1

F2 - Acquisition Parameters  
 Date\_ 20150402  
 Time 8.29  
 INSTRUM spect  
 PROBHD 5 mm PABBO BB-  
 PULPROG zgpg30  
 TD 65536  
 SOLVENT CDCl3  
 NS 450  
 DS 4  
 SWH 24038.461 Hz  
 FIDRES 0.366798 Hz  
 AQ 1.3631988 sec  
 RG 209.25  
 DW 20.800 usec  
 DE 6.50 usec  
 TE 300.1 K  
 D1 2.00000000 sec  
 D11 0.03000000 sec  
 TD0 1

===== CHANNEL f1 =====  
 NUC1 13C  
 P1 10.59 usec  
 PLW1 50.00299835 W  
 SFO1 100.6228293 MHz

===== CHANNEL f2 =====  
 CPDPRG2 waltz16  
 NUC2 1H  
 PCPD2 90.00 usec  
 PLW2 13.00199986 W  
 PLW12 0.35303000 W  
 PLW13 0.28595001 W  
 SFO2 400.1316005 MHz

F2 - Processing parameters  
 SI 32768  
 SF 100.6127547 MHz  
 WDW EM  
 SSB 0  
 LB 1.00 Hz  
 GB 0  
 PC 1.40

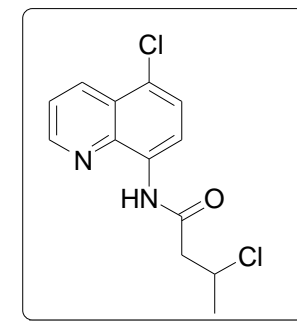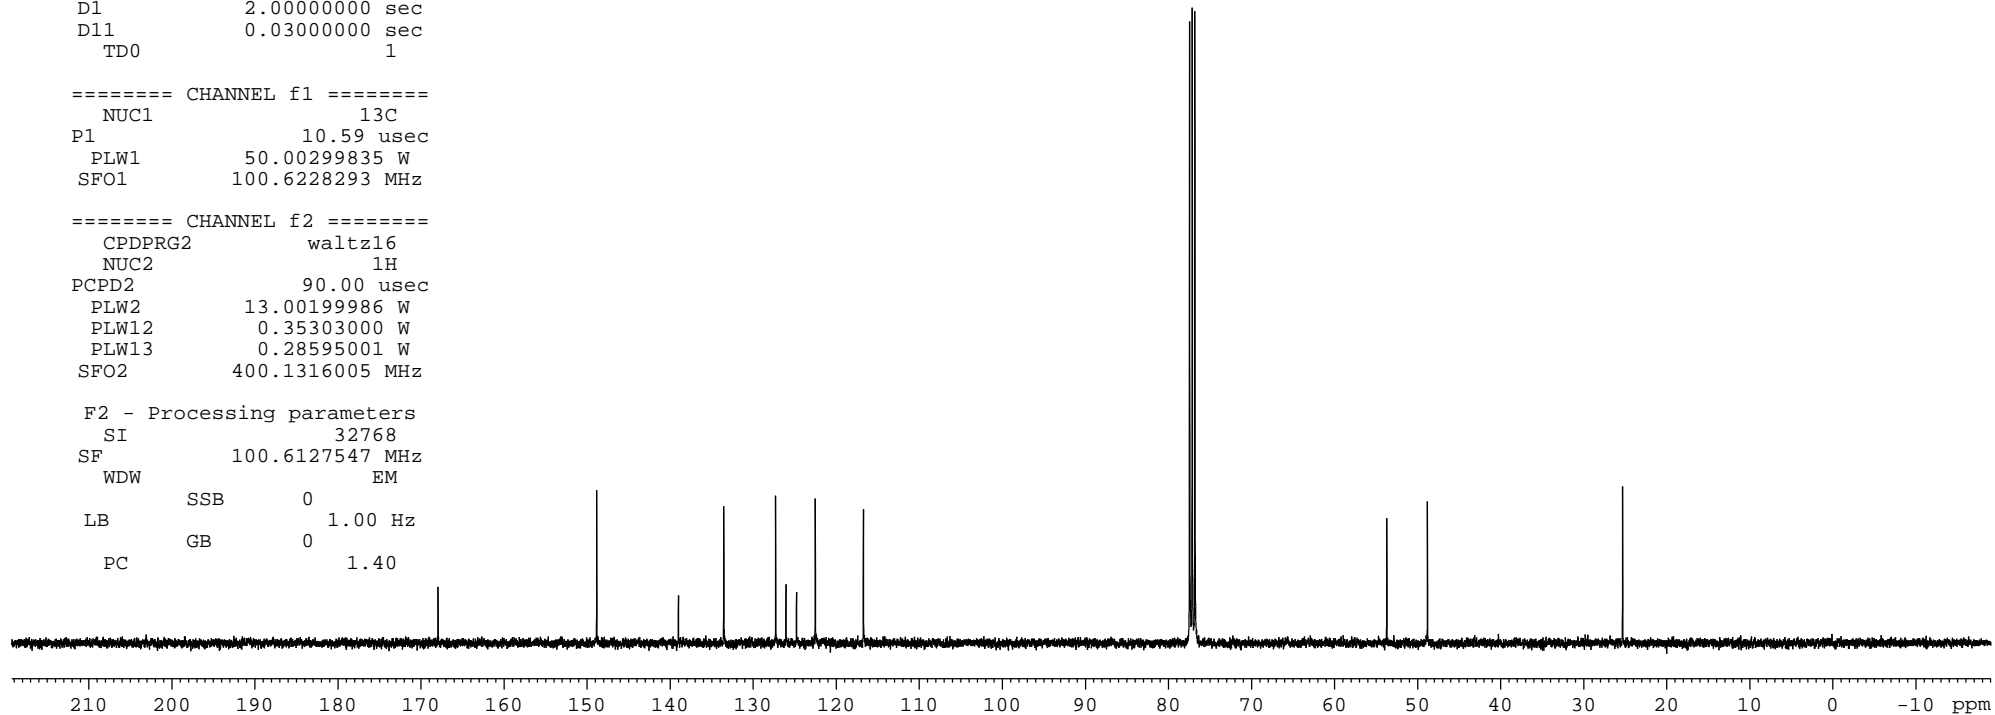

Current Data Parameters

NAME 20150407-zx-2-76-2-p-h  
EXPNO 10  
PROCNO 1

F2 - Acquisition Parameters

Date\_ 20150407  
Time 9.07  
INSTRUM spect  
PROBHD 5 mm PABBO BB-  
PULPROG zg30  
TD 65536  
SOLVENT CDCl3  
NS 16  
DS 2  
SWH 8223.685 Hz  
FIDRES 0.125483 Hz  
AQ 3.9846387 sec  
RG 209.25  
DW 60.800 usec  
DE 6.50 usec  
TE 297.4 K  
D1 1.00000000 sec  
TDO 1

==== CHANNEL f1 =====

NUC1 1H  
P1 14.83 usec  
PLW1 13.00199986 W  
SFO1 400.1324710 MHz

F2 - Processing parameters

SI 65536  
SF 400.1300098 MHz  
WDW EM  
SSB 0  
LB 0.30 Hz  
GB 0  
PC 1.00

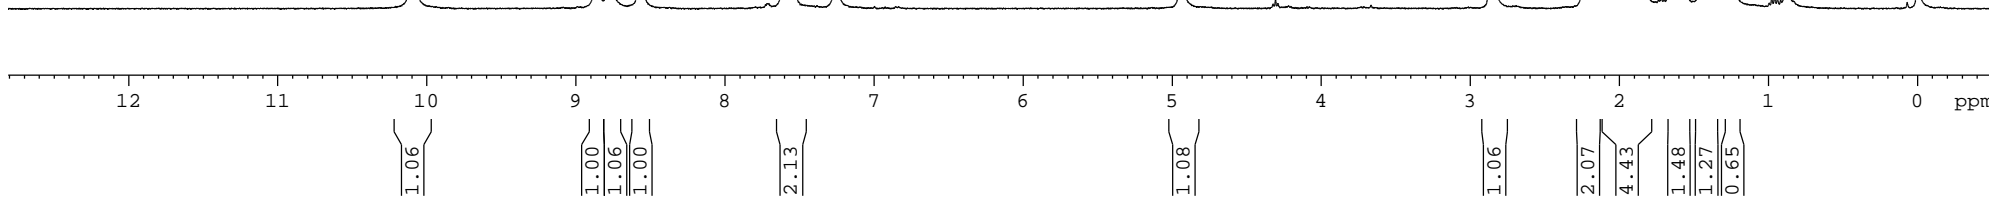

10.0938

8.8706  
8.8613  
8.7799  
8.7590  
8.5780  
8.5570

7.6110  
7.5897  
7.5791  
7.5681  
7.5576  
7.2598

4.9372

2.8669  
2.8375  
2.2231  
2.2133  
2.1936  
2.1843  
2.1624  
2.1538  
2.0804  
2.0495  
2.0150  
1.9821  
1.9590  
1.9512  
1.9196  
1.8857  
1.8510  
1.6387  
1.6098  
1.5711  
1.4628  
1.4318  
1.4011  
1.3793  
1.2533  
-0.0013

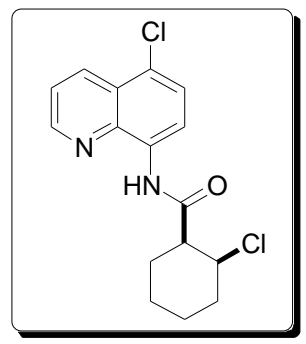

Current Data Parameters  
 NAME 20150407-zx-2-76-p-2-c  
 EXPNO 10  
 PROCNO 1

F2 - Acquisition Parameters  
 Date\_ 20150407  
 Time 23.06  
 INSTRUM spect  
 PROBHD 5 mm PABBO BB-  
 PULPROG zgpg30  
 TD 65536  
 SOLVENT CDCl3  
 NS 762  
 DS 4  
 SWH 24038.461 Hz  
 FIDRES 0.366798 Hz  
 AQ 1.3631988 sec  
 RG 209.25  
 DW 20.800 usec  
 DE 6.50 usec  
 TE 298.6 K  
 D1 2.00000000 sec  
 D11 0.03000000 sec  
 TD0 1

==== CHANNEL f1 =====  
 NUC1 13C  
 P1 10.59 usec  
 PLW1 50.00299835 W  
 SFO1 100.6228293 MHz

==== CHANNEL f2 =====  
 CPDPRG2 waltz16  
 NUC2 1H  
 PCPD2 90.00 usec  
 PLW2 13.00199986 W  
 PLW12 0.35303000 W  
 PLW13 0.28595001 W  
 SFO2 400.1316005 MHz

F2 - Processing parameters  
 SI 32768  
 SF 100.6127526 MHz  
 WDW EM  
 SSB 0  
 LB 1.00 Hz  
 GB 0  
 PC 1.40

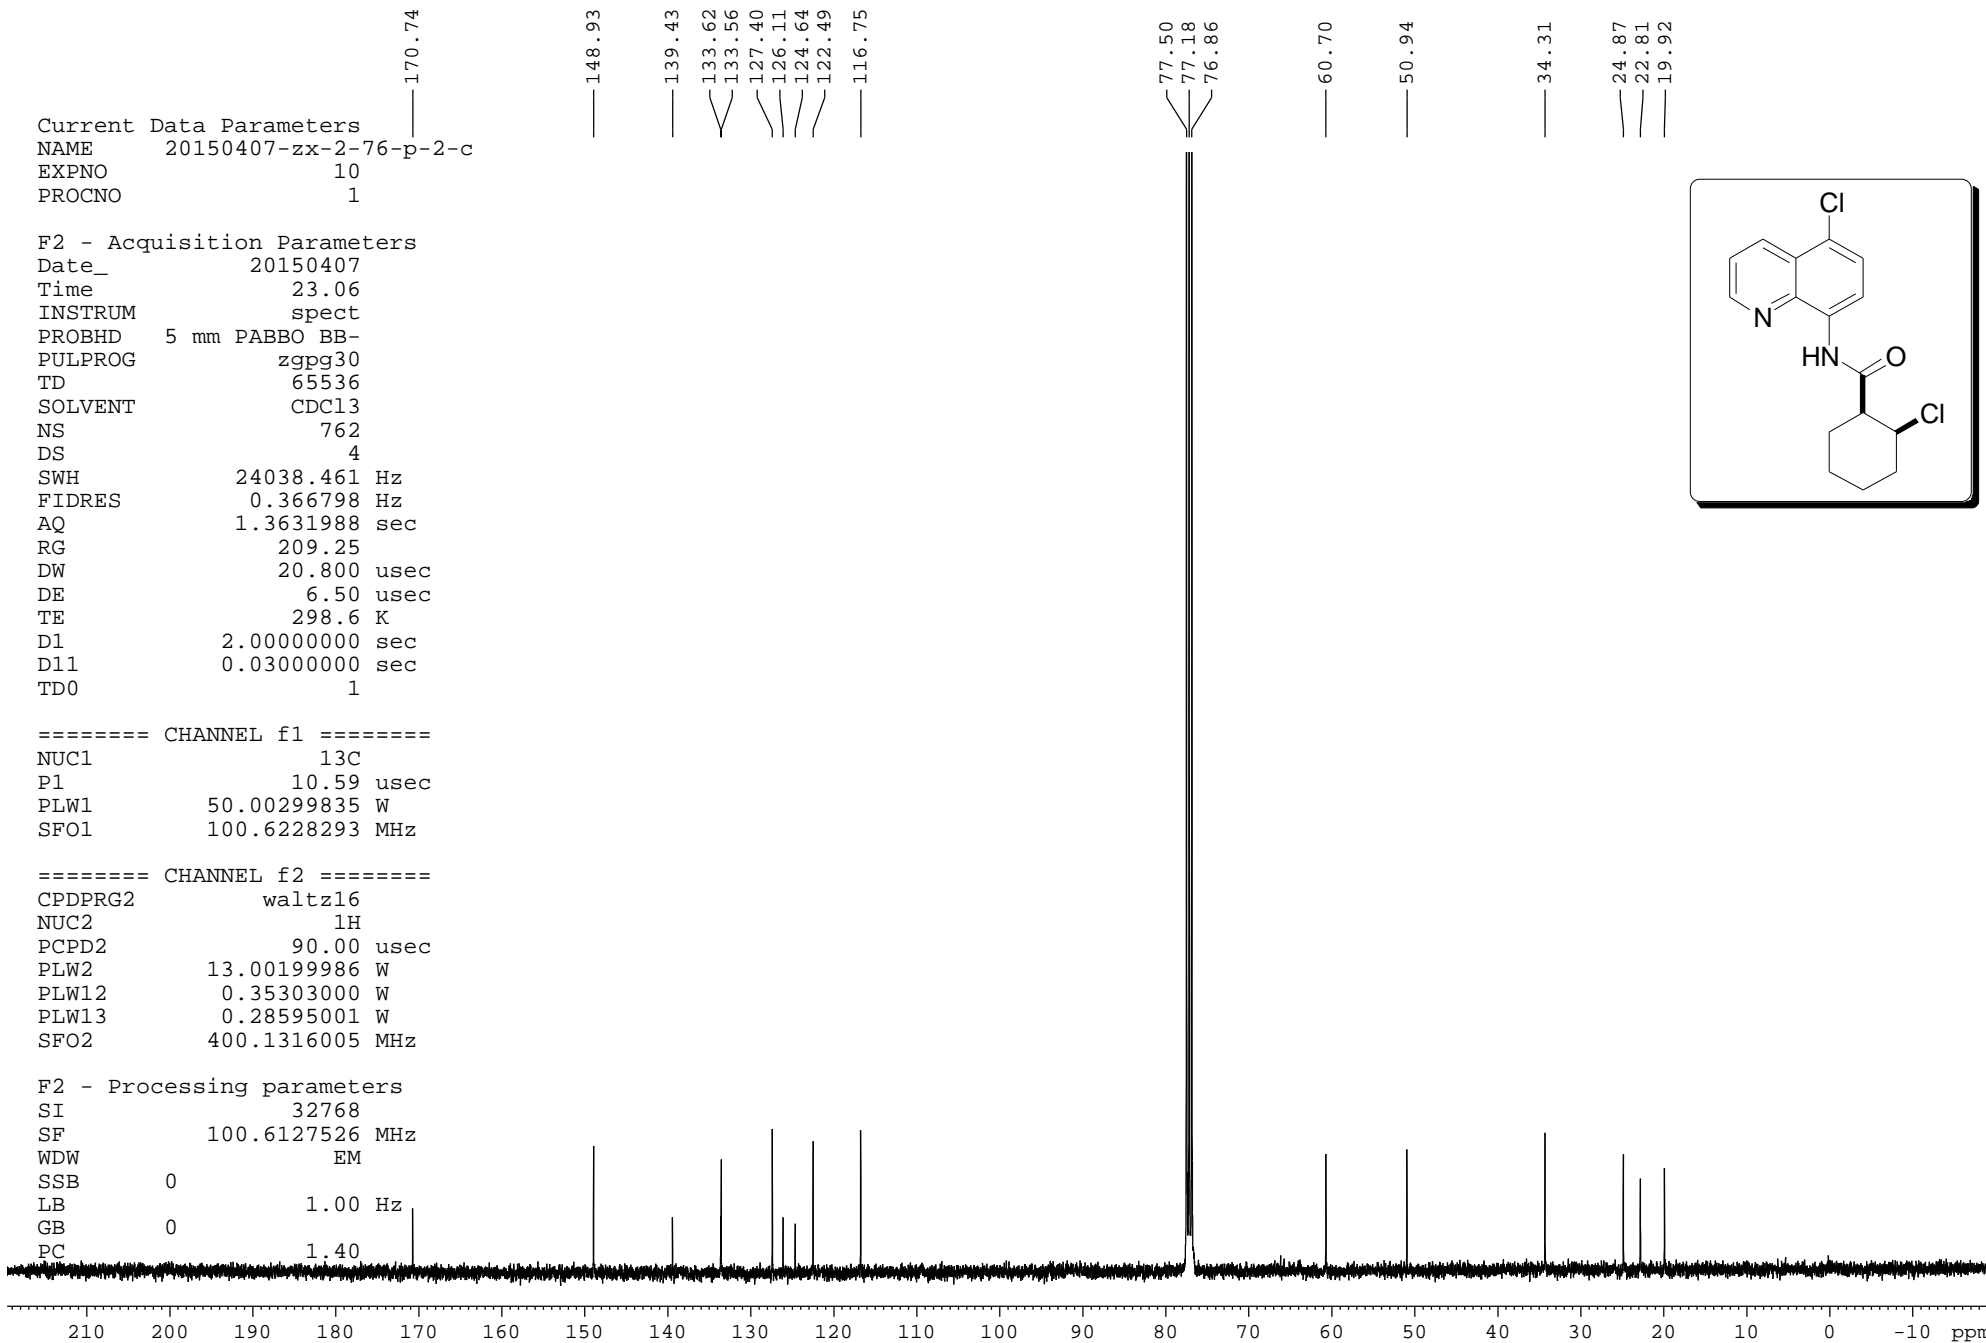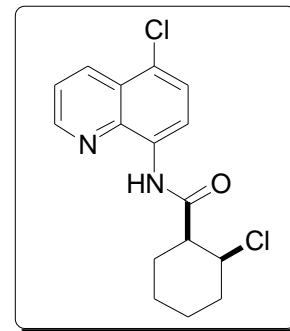

Current Data Parameters  
 NAME zx-2-76-pl-h-20150405-  
 EXPNO 11  
 PROCNO 1

F2 - Acquisition Parameters  
 Date\_ 20150405  
 Time 20.15  
 INSTRUM spect  
 PROBHD 5 mm PABBO BB-  
 PULPROG zg30  
 TD 65536  
 SOLVENT CDCl3  
 NS 16  
 DS 2  
 SWH 8223.685 Hz  
 FIDRES 0.125483 Hz  
 AQ 3.9846387 sec  
 RG 209.25  
 DW 60.800 usec  
 DE 6.50 usec  
 TE 299.1 K  
 D1 1.00000000 sec  
 TD0 1

==== CHANNEL f1 =====  
 NUC1 1H  
 P1 14.83 usec  
 PLW1 13.00199986 W  
 SFO1 400.1324710 MHz

F2 - Processing parameters  
 SI 65536  
 SF 400.1300096 MHz  
 WDW EM  
 SSB 0  
 LB 0.30 Hz  
 GB 0  
 PC 1.00

9.8544  
 8.8715  
 8.8682  
 8.8612  
 8.8580  
 8.7880  
 8.7670  
 8.5871  
 8.5838  
 8.5659  
 8.5626  
 7.6175  
 7.5960  
 7.5831  
 7.5723  
 7.5618  
 7.2601

4.2923  
 4.2815  
 4.2639  
 4.2548  
 4.2370  
 4.2262  
 2.7136  
 2.7039  
 2.6840  
 2.6768  
 2.6578  
 2.6485  
 2.3782  
 2.3666  
 2.3543  
 2.3458  
 2.1470  
 2.1136  
 2.1066  
 1.8808  
 1.8724  
 1.8515  
 1.8200  
 1.8040  
 1.7939  
 1.7835  
 1.7731  
 1.7632  
 1.7533  
 1.7401  
 1.7318  
 1.7225  
 1.7089  
 1.7002  
 1.6905  
 1.5643  
 1.5044  
 1.4728  
 1.4650  
 1.4404

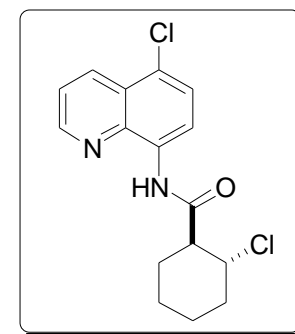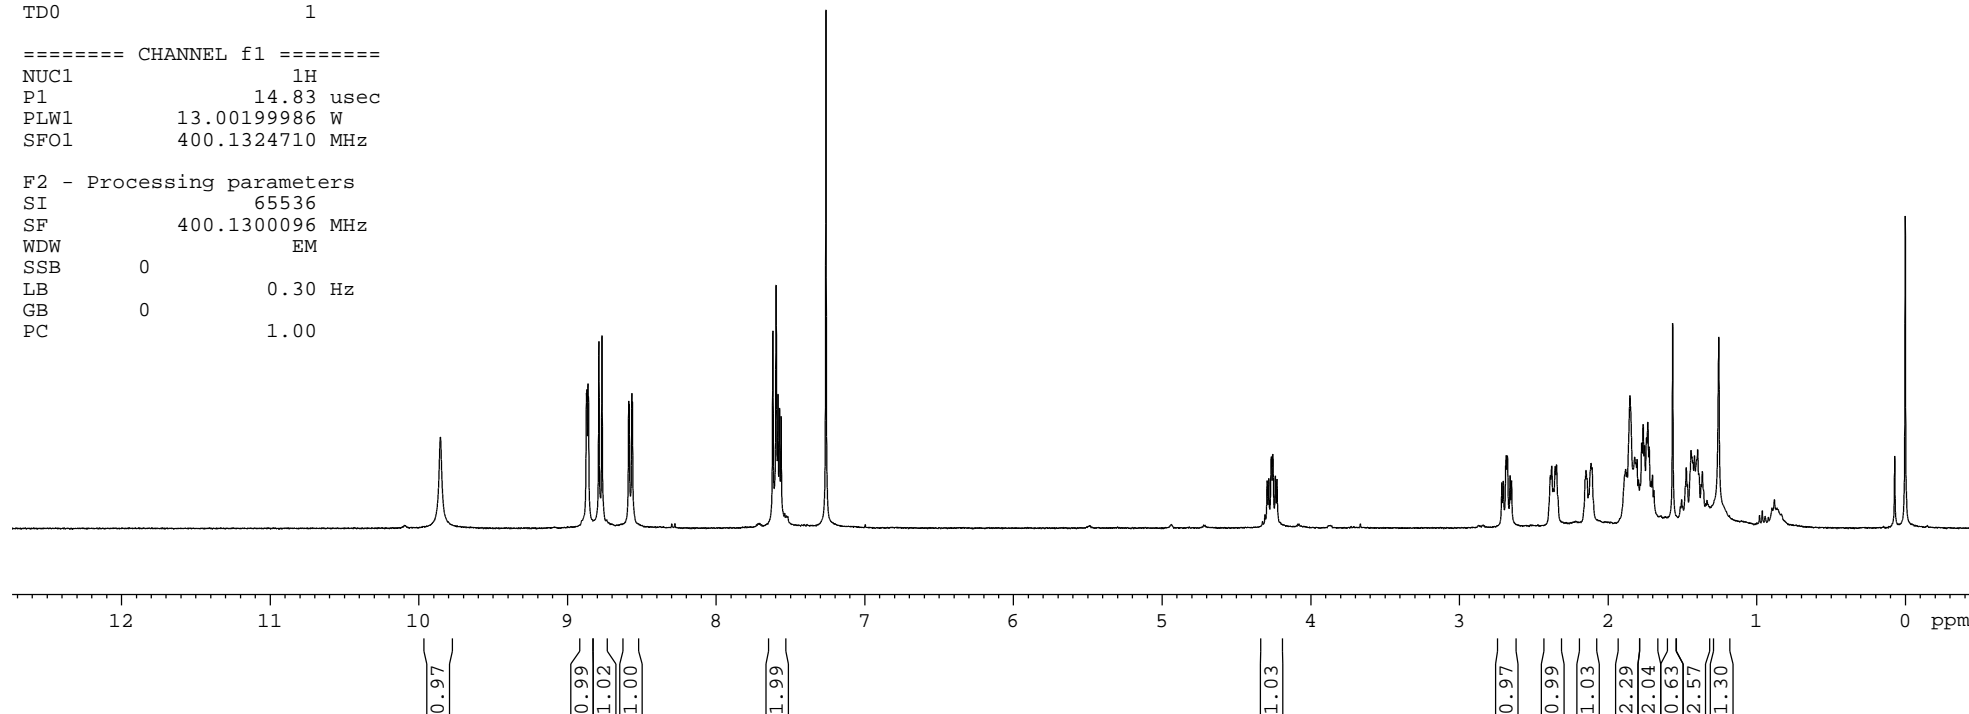

— 171.91  
 — 148.79  
 — 139.12  
 133.69  
 133.56  
 127.36  
 126.07  
 124.63  
 122.47  
 — 116.80

Current Data Parameters  
 NAME 20150405-zx-2-76-p2-h  
 EXPNO 10  
 PROCNO 1

F2 - Acquisition Parameters  
 Date\_ 20150405  
 Time 22.02  
 INSTRUM spect  
 PROBHD 5 mm PABBO BB-  
 PULPROG zgpg30  
 TD 65536  
 SOLVENT CDCl3  
 NS 1024  
 DS 4  
 SWH 24038.461 Hz  
 FIDRES 0.366798 Hz  
 AQ 1.3631988 sec  
 RG 209.25  
 DW 20.800 usec  
 DE 6.50 usec  
 TE 299.3 K  
 D1 2.00000000 sec  
 D11 0.03000000 sec  
 TD0 1

===== CHANNEL f1 =====  
 NUC1 13C  
 P1 10.59 usec  
 PLW1 50.00299835 W  
 SFO1 100.6228293 MHz

===== CHANNEL f2 =====  
 CPDPRG2 waltz16  
 NUC2 1H  
 PCPD2 90.00 usec  
 PLW2 13.00199986 W  
 PLW12 0.35303000 W  
 PLW13 0.28595001 W  
 SFO2 400.1316005 MHz

F2 - Processing parameters  
 SI 32768  
 SF 100.6127541 MHz  
 WDW EM  
 SSB 0  
 LB 1.00 Hz  
 GB 0  
 PC 1.40

77.45  
 77.13  
 76.82  
 — 60.16  
 — 56.41  
 — 36.56  
 — 30.79  
 25.96  
 24.58

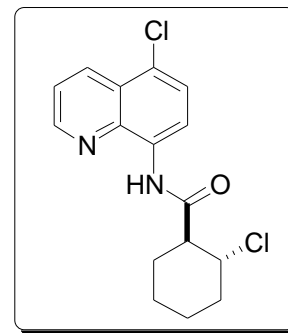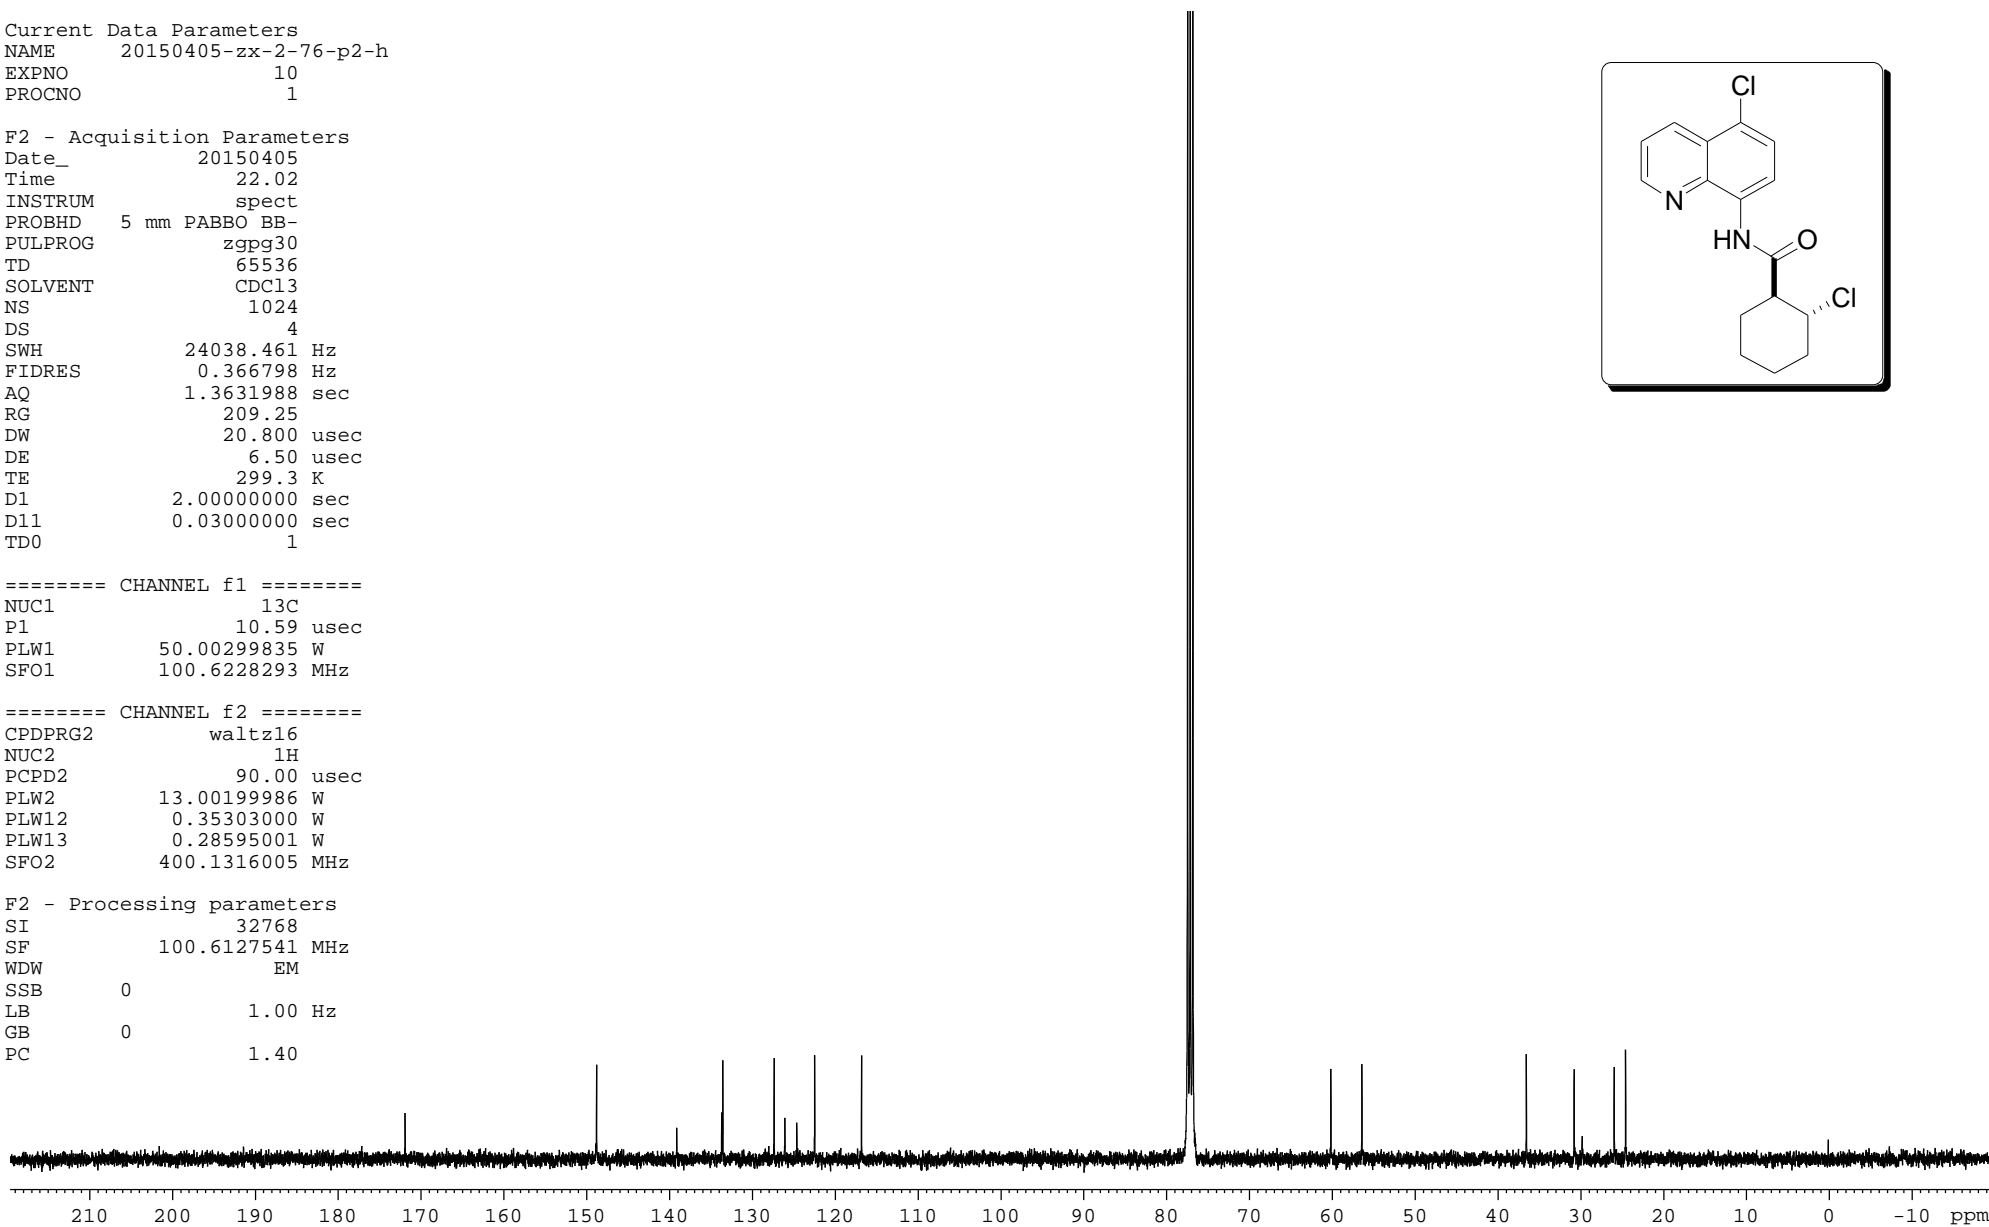

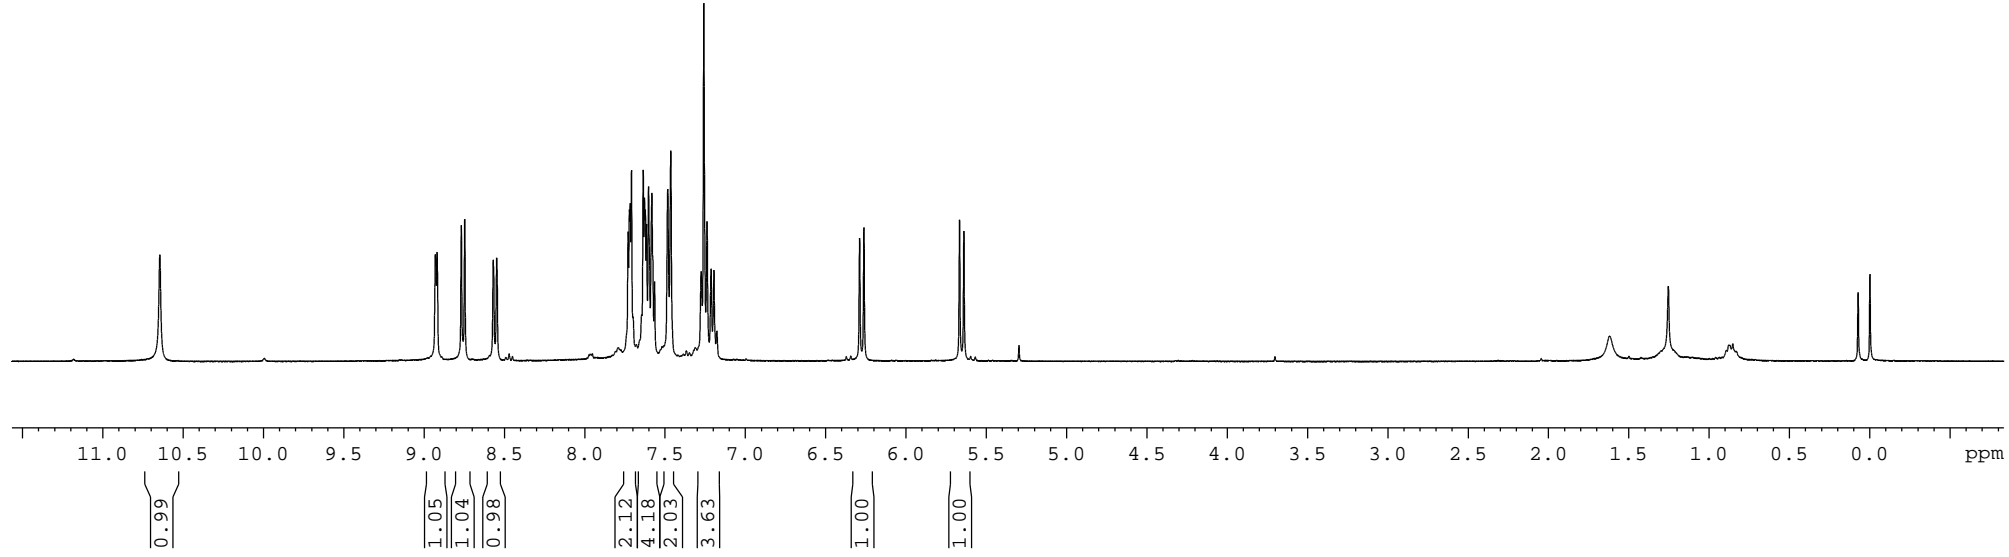

— 10.6453

8.9316  
8.9214  
8.7698  
8.7488  
8.5709  
8.5497  
7.7314  
7.7234  
7.7180  
7.7103  
7.6372  
7.6296  
7.6238  
7.6160  
7.6041  
7.5833  
7.5667  
7.4843  
7.4658  
7.2763  
7.2601  
7.2398  
7.2146  
7.1969  
6.2900  
6.2630  
  
5.6676  
5.6406

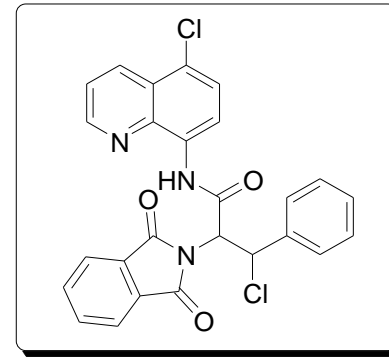

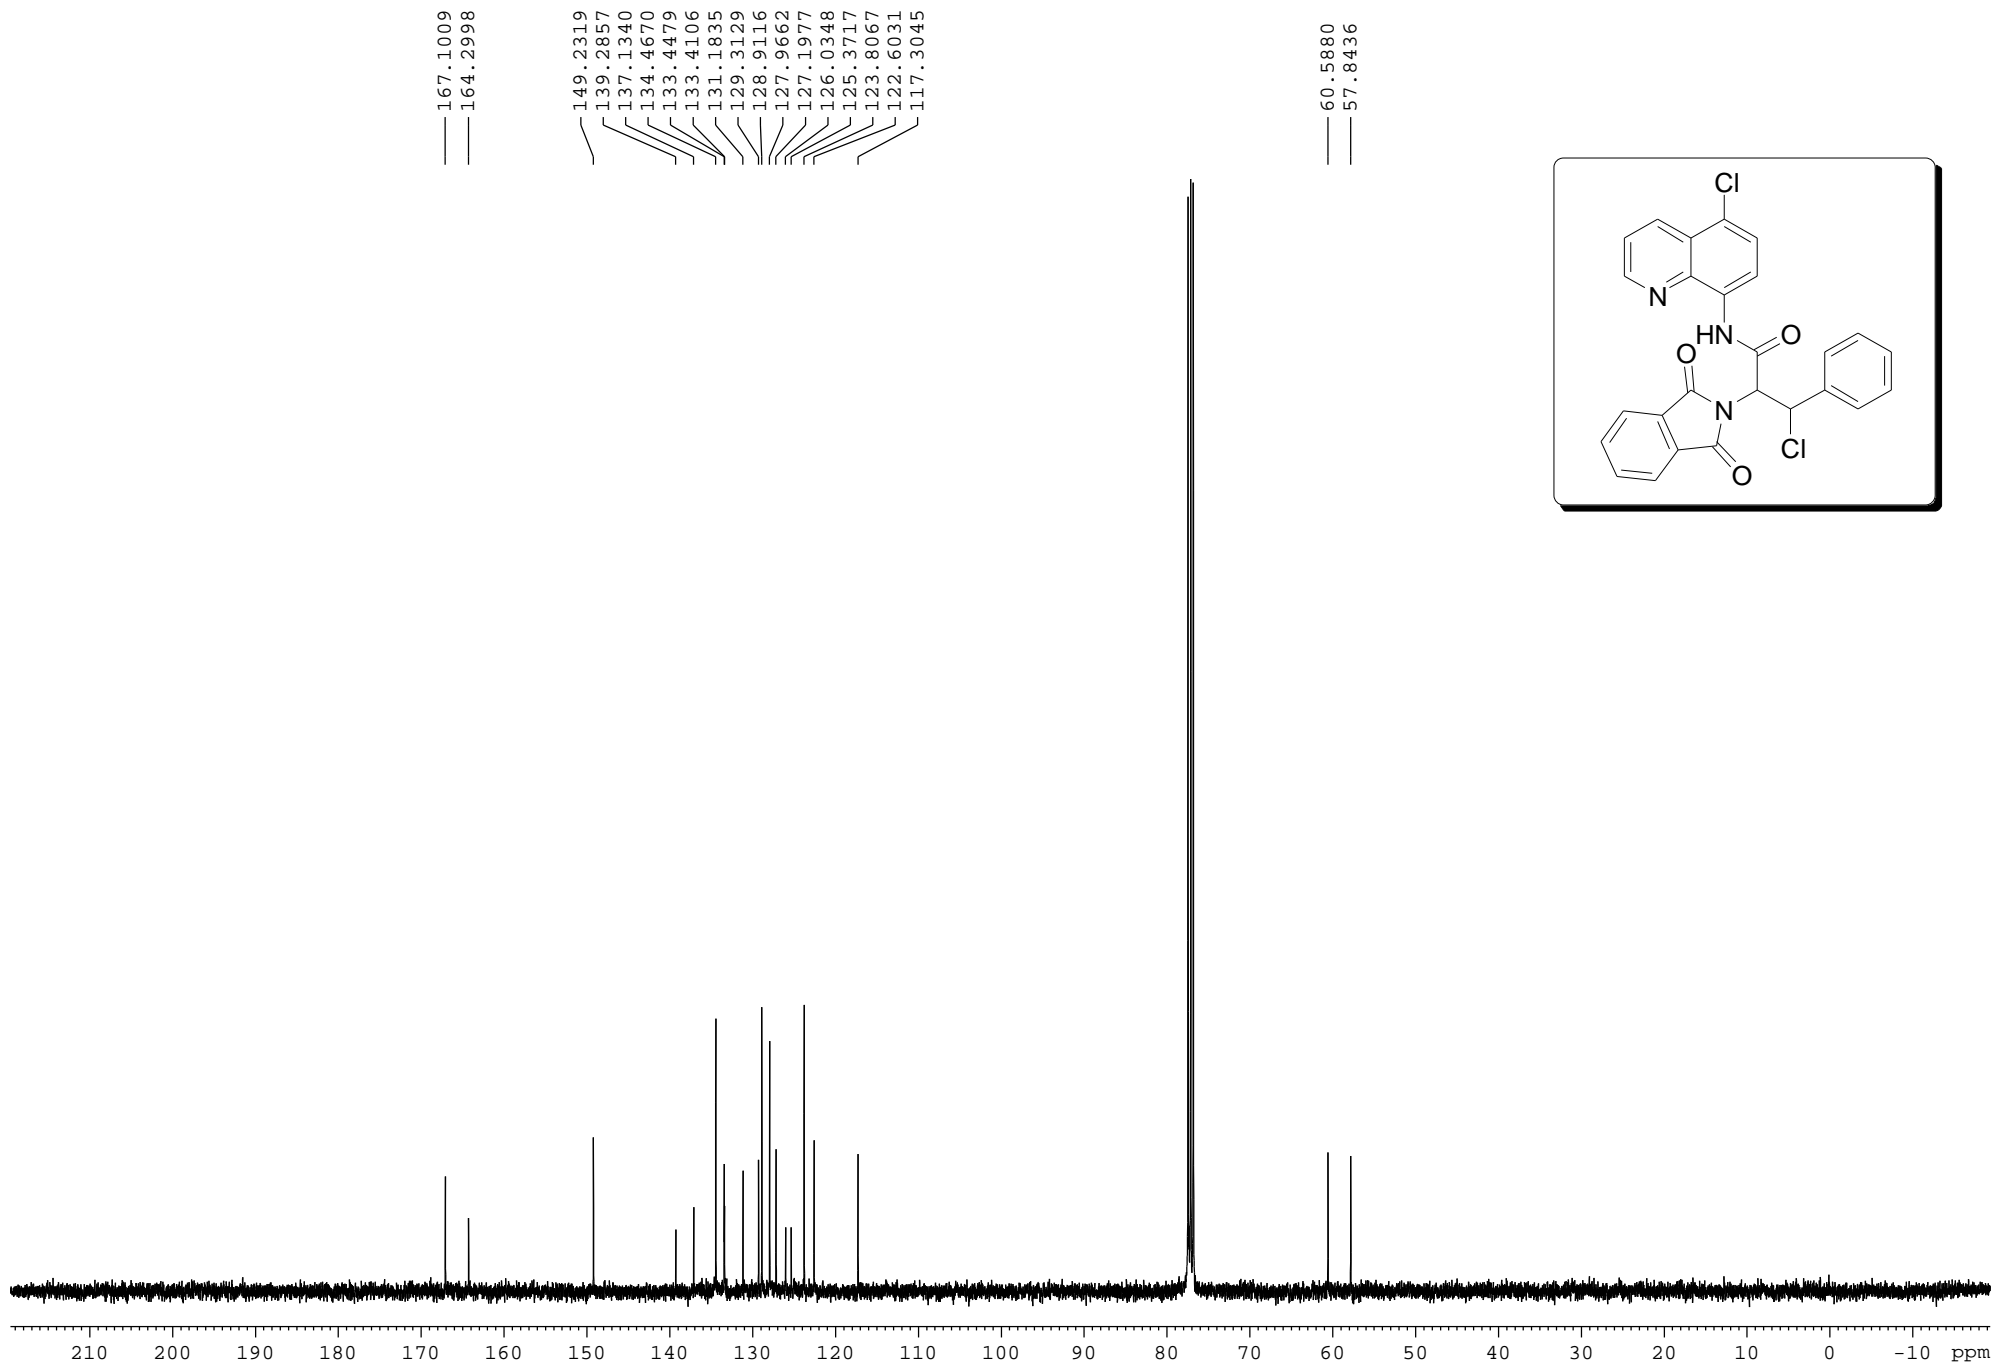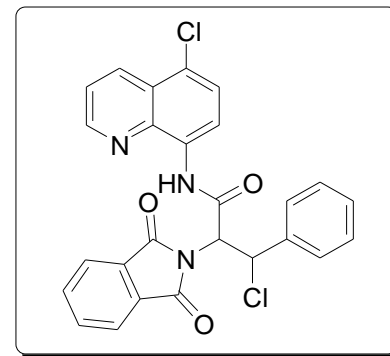



Current Data Parameters  
 NAME YXL-10-81-H-20150916  
 EXPNO 20  
 PROCNO 1

F2 - Acquisition Parameters  
 Date\_ 20150916  
 Time 20.51  
 INSTRUM spect  
 PROBHD 5 mm PABBO BB-  
 PULPROG zg30  
 TD 65536  
 SOLVENT CDCl3  
 NS 16  
 DS 2  
 SWH 8223.685 Hz  
 FIDRES 0.125483 Hz  
 AQ 3.9846387 sec  
 RG 209.25  
 DW 60.800 usec  
 DE 6.50 usec  
 TE 297.1 K  
 D1 1.00000000 sec  
 TD0 1

==== CHANNEL f1 =====  
 NUC1 1H  
 P1 14.80 usec  
 PLW1 13.00199986 W  
 SFO1 400.1324710 MHz

F2 - Processing parameters  
 SI 65536  
 SF 400.1300088 MHz  
 WDW EM  
 SSB 0  
 LB 0.30 Hz  
 GB 0  
 PC 1.00

10.541

8.892  
8.886  
8.703  
8.681  
8.560  
8.539  
7.903  
7.897  
7.890  
7.774  
7.766  
7.761  
7.574  
7.553  
7.260

5.304  
5.280  
5.259  
5.231  
5.205

2.044  
1.996  
1.978  
1.960  
1.942  
1.759  
1.741  
1.722  
1.704  
1.685  
1.667  
1.139  
1.121  
1.103

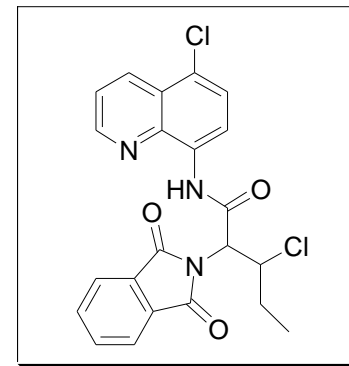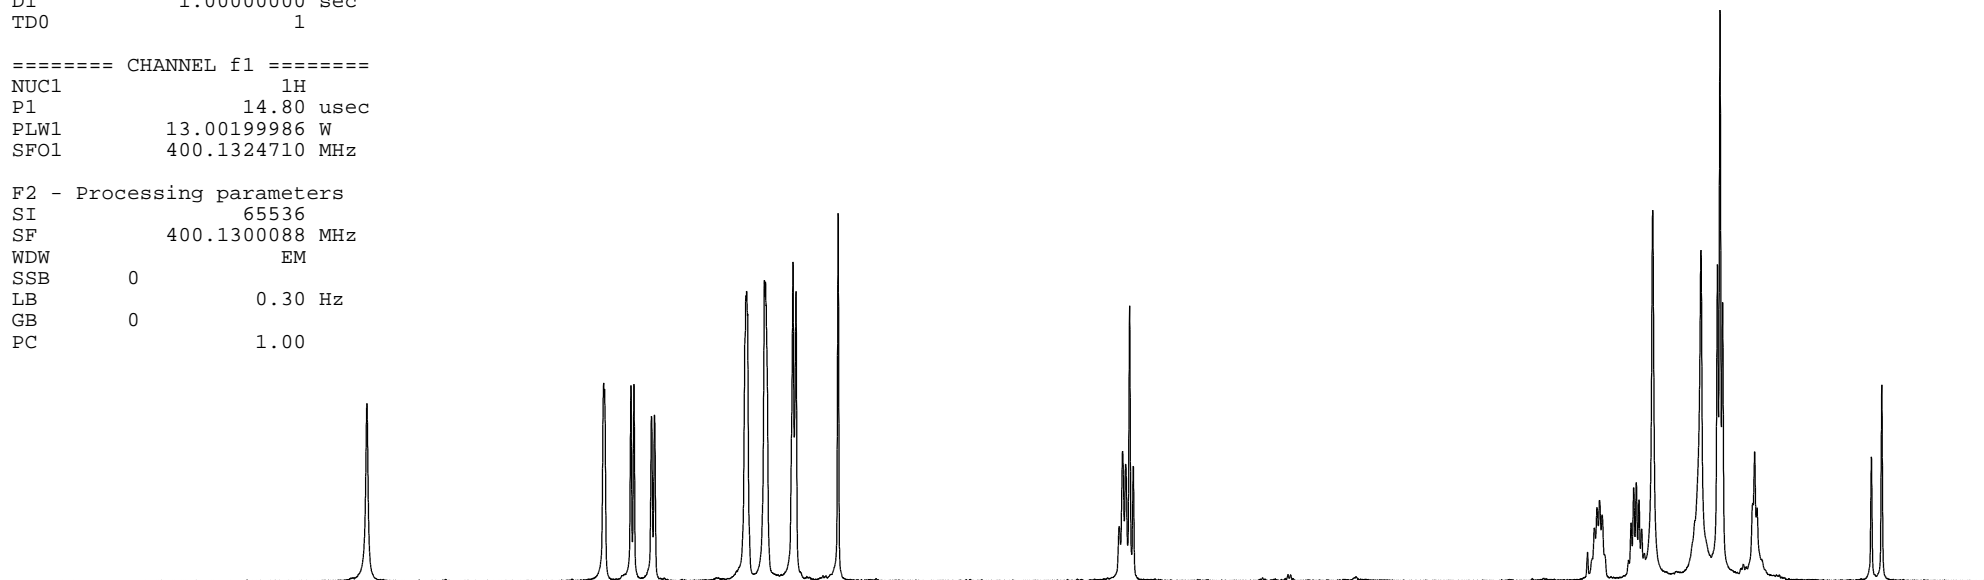

1.02

1.02  
1.02  
1.00

2.09  
2.12  
2.09

2.10

1.18  
1.27

3.25

ppm

Current Data Parameters  
NAME YXL-10-81-C-20150916  
EXPNO 22  
PROCNO 1

F2 - Acquisition Parameters  
Date\_ 20150917  
Time\_ 2.45  
INSTRUM spect  
PROBHD 5 mm PABBO BB-  
PULPROG zgpg30  
TD 65536  
SOLVENT CDCl3  
NS 450  
DS 4  
SWH 24038.461 Hz  
FIDRES 0.366798 Hz  
AQ 1.3631988 sec  
RG 209.25  
DW 20.800 usec  
DE 6.50 usec  
TE 297.1 K  
D1 2.00000000 sec  
D11 0.03000000 sec  
TD0 1

=====  
CHANNEL f1  
NUC1 13C  
P1 10.90 usec  
PLW1 50.00299835 W  
SFO1 100.6228293 MHz

=====  
CHANNEL f2  
CPDPRG2 waltz16  
NUC2 1H  
PCPD2 90.00 usec  
PLW2 13.00199986 W  
PLW12 0.38069001 W  
PLW13 0.30836001 W  
SFO2 400.1316005 MHz

F2 - Processing parameters  
SI 32768  
SF 100.6127567 MHz  
WDW EM  
SSB 0  
LB 1.00 Hz  
GB 0  
PC 1.40

167.68  
164.79

149.16

139.30  
134.72  
133.41  
131.61  
127.16  
126.02  
125.26  
124.07  
122.55  
117.18

60.23  
59.43

27.75

9.94

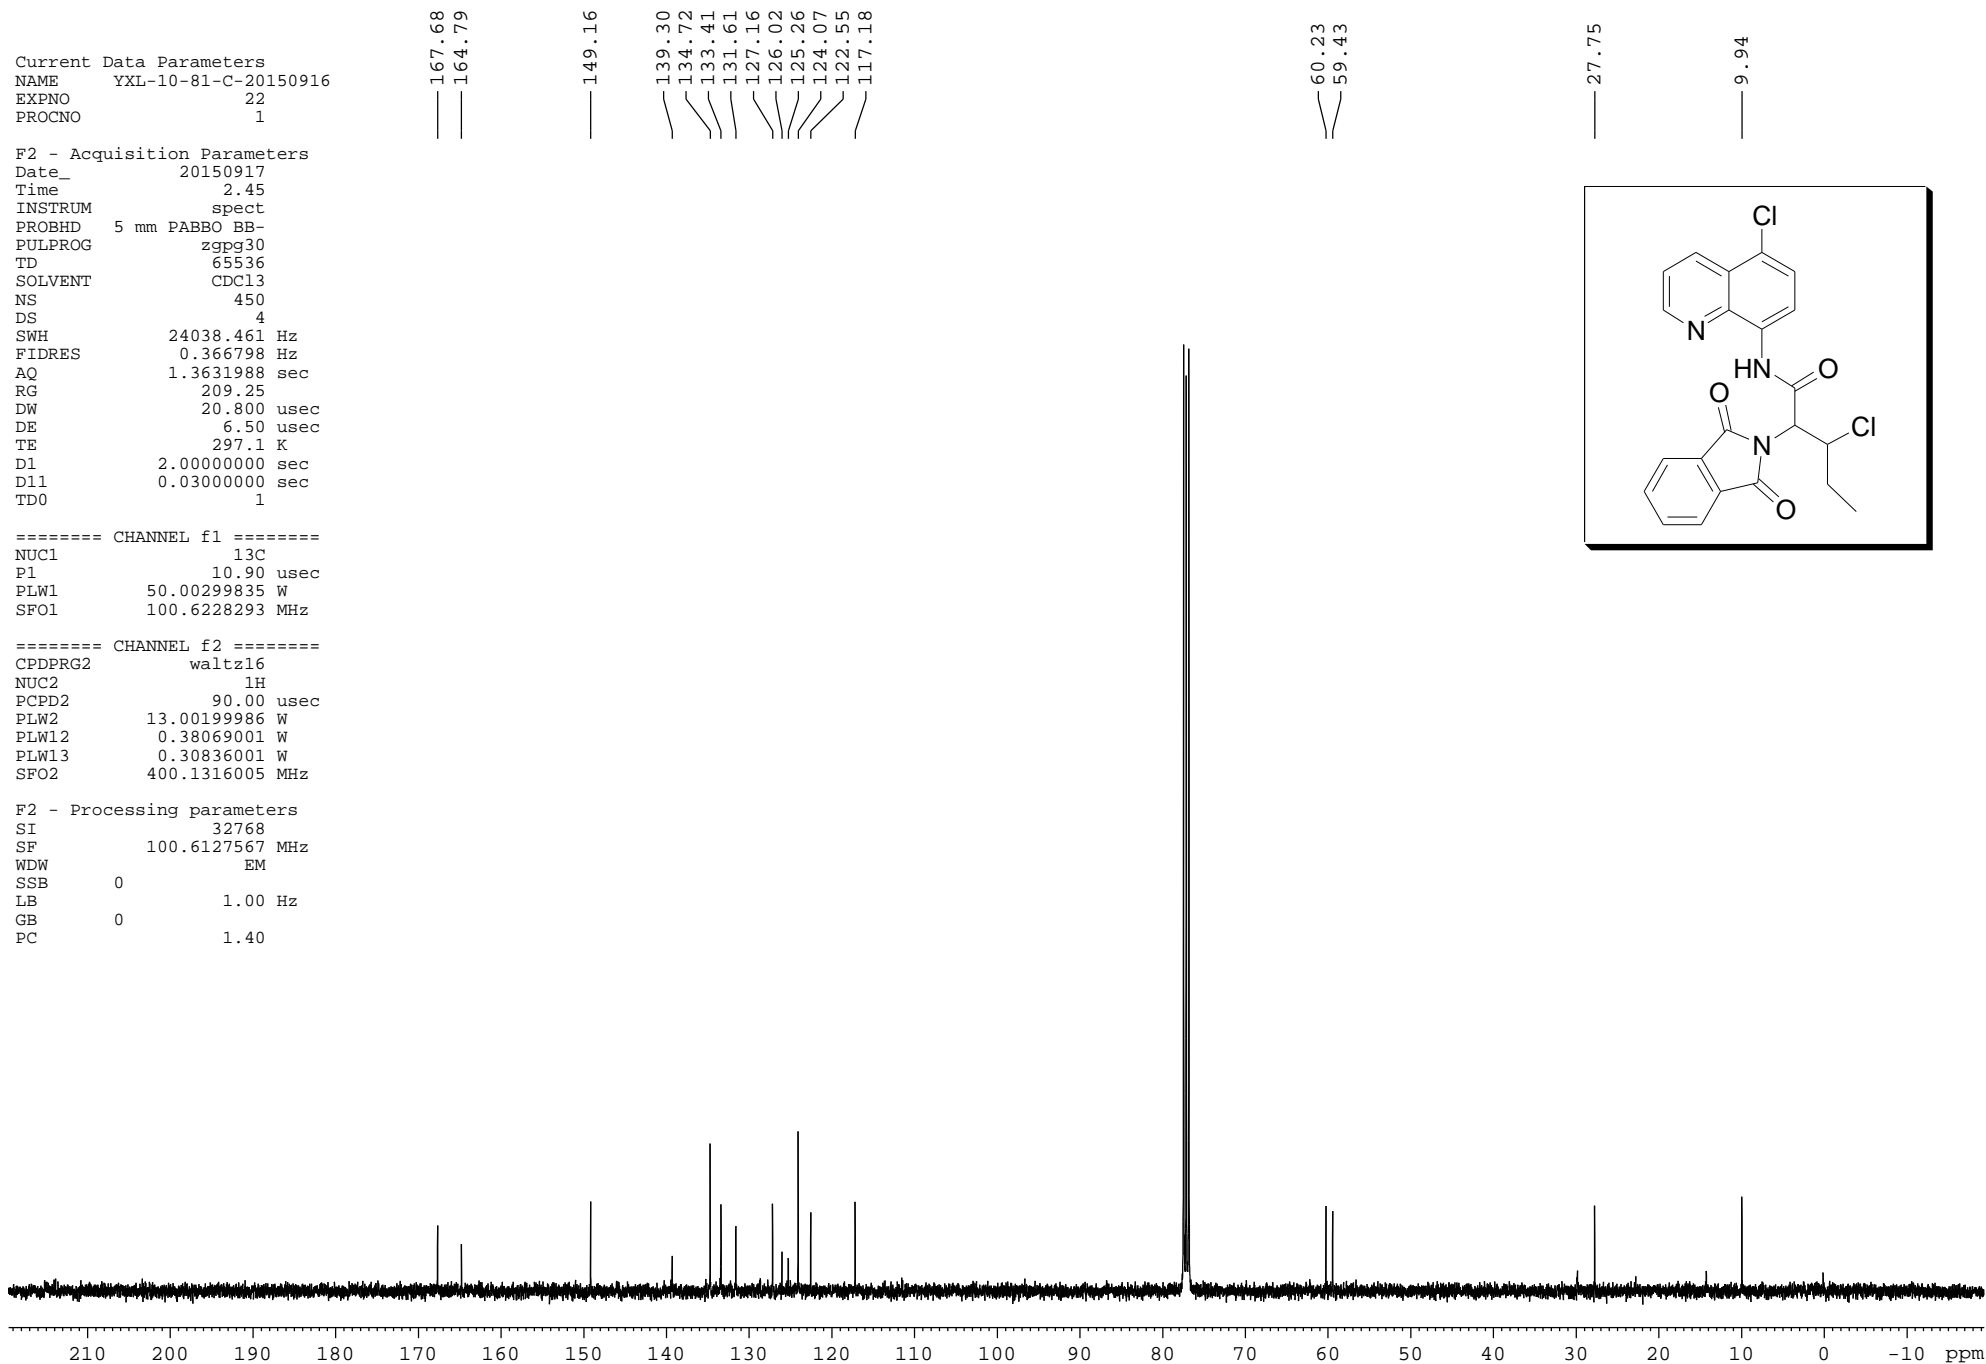

Current Data Parameters  
NAME YXL-8-299-I-H-20141229  
EXPNO 10  
PROCNO 1

F2 - Acquisition Parameters  
Date\_ 20141229  
Time 22.25  
INSTRUM spect  
PROBHD 5 mm PABBO BB-  
PULPROG zg30  
TD 65536  
SOLVENT CDCl3  
NS 16  
DS 2  
SWH 8223.685 Hz  
FIDRES 0.125483 Hz  
AQ 3.9846387 sec  
RG 209.25  
DW 60.800 usec  
DE 6.50 usec  
TE 297.7 K  
D1 1.00000000 sec  
TD0 1

==== CHANNEL f1 =====  
NUC1 1H  
P1 14.83 usec  
PLW1 13.00199986 W  
SFO1 400.1324710 MHz

F2 - Processing parameters  
SI 65536  
SF 400.1300101 MHz  
WDW EM  
SSB 0  
LB 0.30 Hz  
GB 0  
PC 1.00

9.7968

8.8581  
8.8508  
8.7346  
8.7136  
8.5916  
8.5887  
8.5704  
8.5675  
7.6182  
7.5975  
7.5906  
7.5797  
7.5691  
7.2602

3.5424  
3.5247  
3.5072  
3.2327  
3.2152  
3.1975

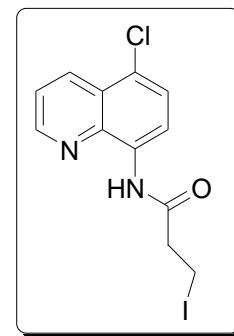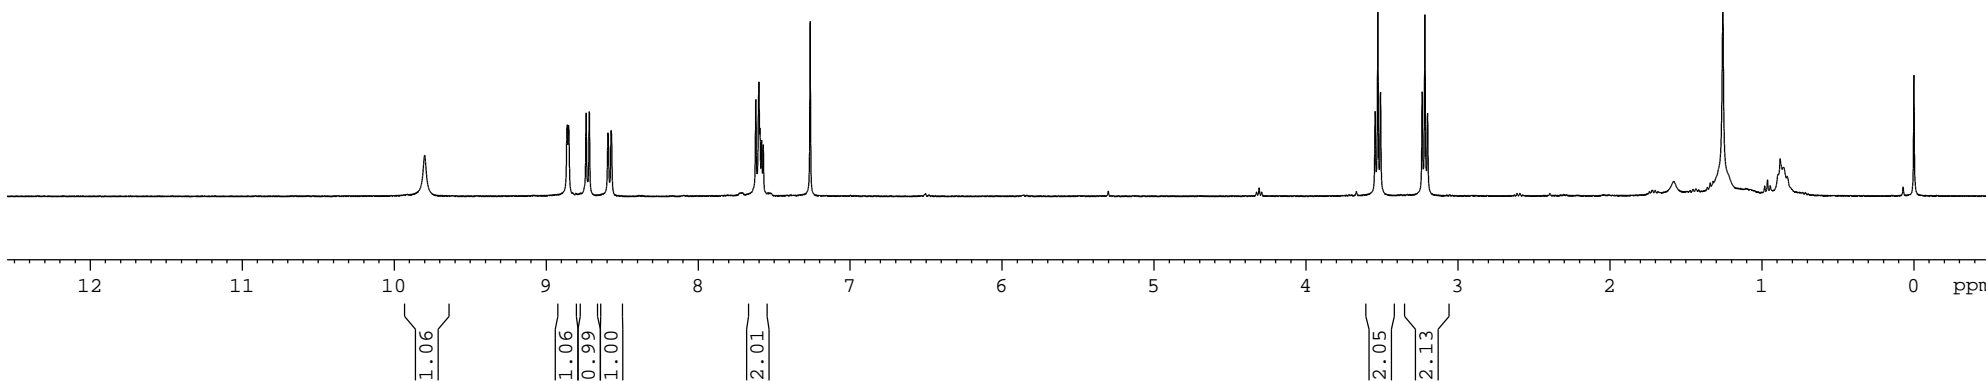

Current Data Parameters  
NAME zx-2-78-H-20150411  
EXPNO 20  
PROCNO 1

F2 - Acquisition Parameters  
Date\_ 20150411  
Time 15.16  
INSTRUM spect  
PROBHD 5 mm PABBO BB-  
PULPROG zg30  
TD 65536  
SOLVENT CDCl3  
NS 16  
DS 2  
SWH 8223.685 Hz  
FIDRES 0.125483 Hz  
AQ 3.9846387 sec  
RG 144.49  
DW 60.800 usec  
DE 6.50 usec  
TE 301.5 K  
D1 1.0000000 sec  
TD0 1

==== CHANNEL f1 =====  
NUC1 1H  
P1 14.83 usec  
PLW1 13.00199986 W  
SFO1 400.1324710 MHz

F2 - Processing parameters  
SI 65536  
SF 400.1300092 MHz  
WDW EM  
SSB 0  
LB 0.30 Hz  
GB 0  
PC 1.00

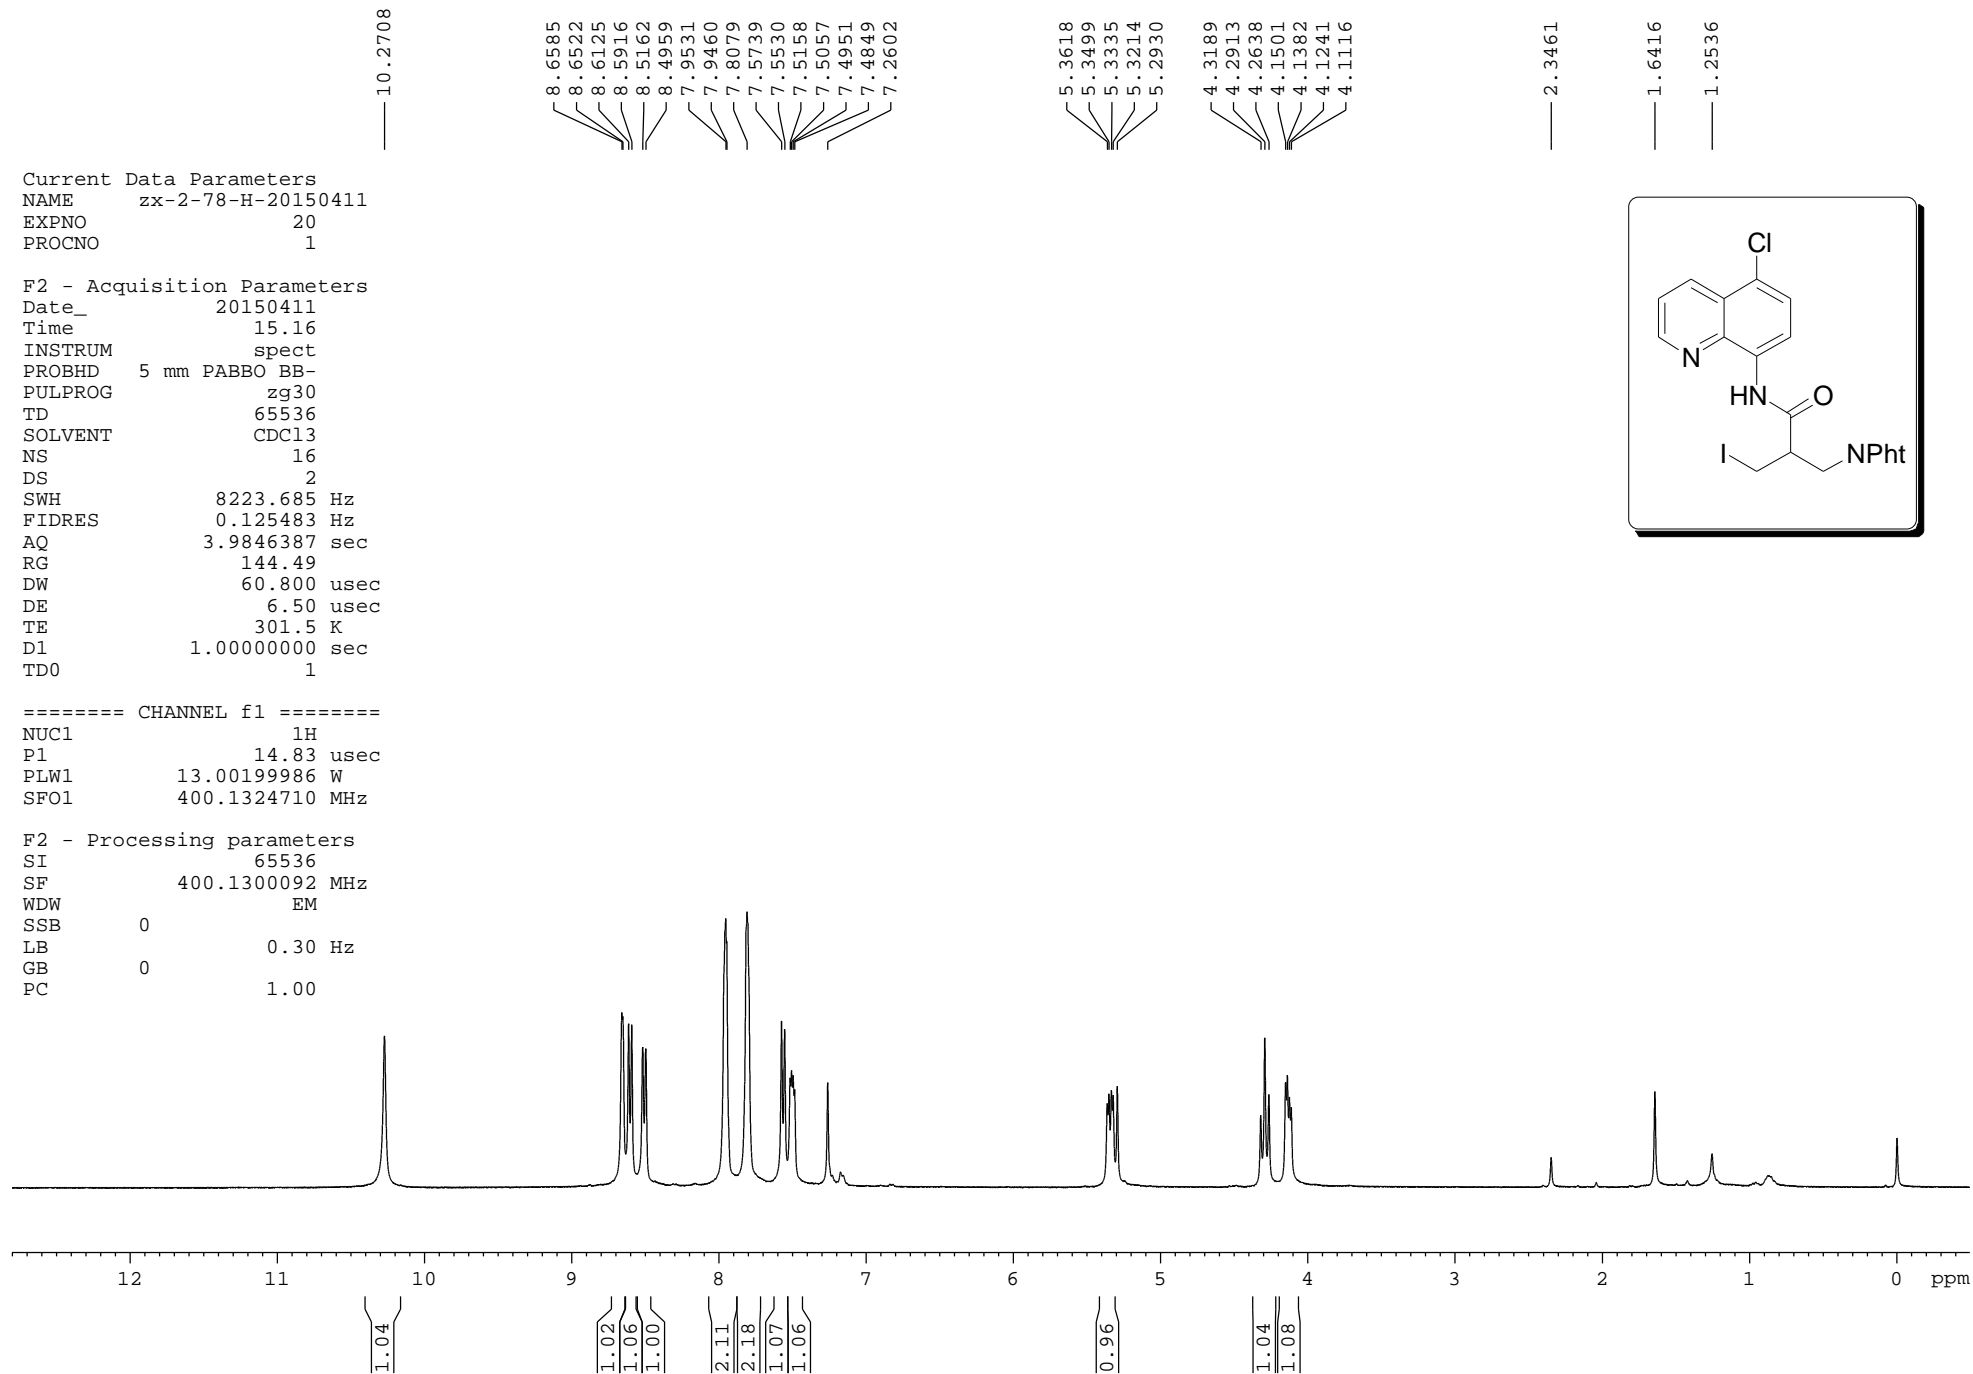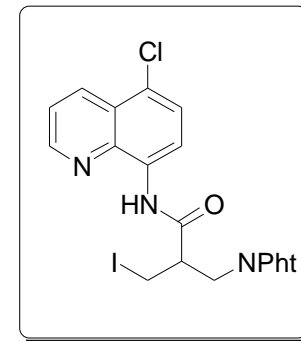

Current Data Parameters  
NAME 20150412-zx-2-78c  
EXPNO 20  
PROCNO 1

F2 - Acquisition Parameters  
Date\_ 20150412  
Time 15.16  
INSTRUM spect  
PROBHD 5 mm PABBO BB-  
PULPROG zgpg30  
TD 65536  
SOLVENT CDC13  
NS 512  
DS 4  
SWH 24038.461 Hz  
FIDRES 0.366798 Hz  
AQ 1.3631988 sec  
RG 209.25  
DW 20.800 usec  
DE 6.50 usec  
TE 302.7 K  
D1 2.00000000 sec  
D11 0.03000000 sec  
TD0 1

==== CHANNEL f1 =====  
NUC1 13C  
P1 10.59 usec  
PLW1 50.00299835 W  
SFO1 100.6228293 MHz

==== CHANNEL f2 =====  
CPDPRG2 waltz16  
NUC2 1H  
PCPD2 90.00 usec  
PLW2 13.00199986 W  
PLW12 0.35303000 W  
PLW13 0.28595001 W  
SFO2 400.1316005 MHz

F2 - Processing parameters  
SI 32768  
SF 100.6127548 MHz  
WDW EM  
SSB 0  
LB 1.00 Hz  
GB 0  
PC 1.40

167.53  
164.26  
149.08  
139.05  
134.73  
133.52  
132.89  
131.72  
127.17  
126.01  
125.42  
124.11  
122.57  
116.94

77.49  
77.17  
76.85

57.30

0.62

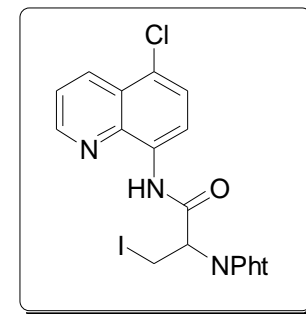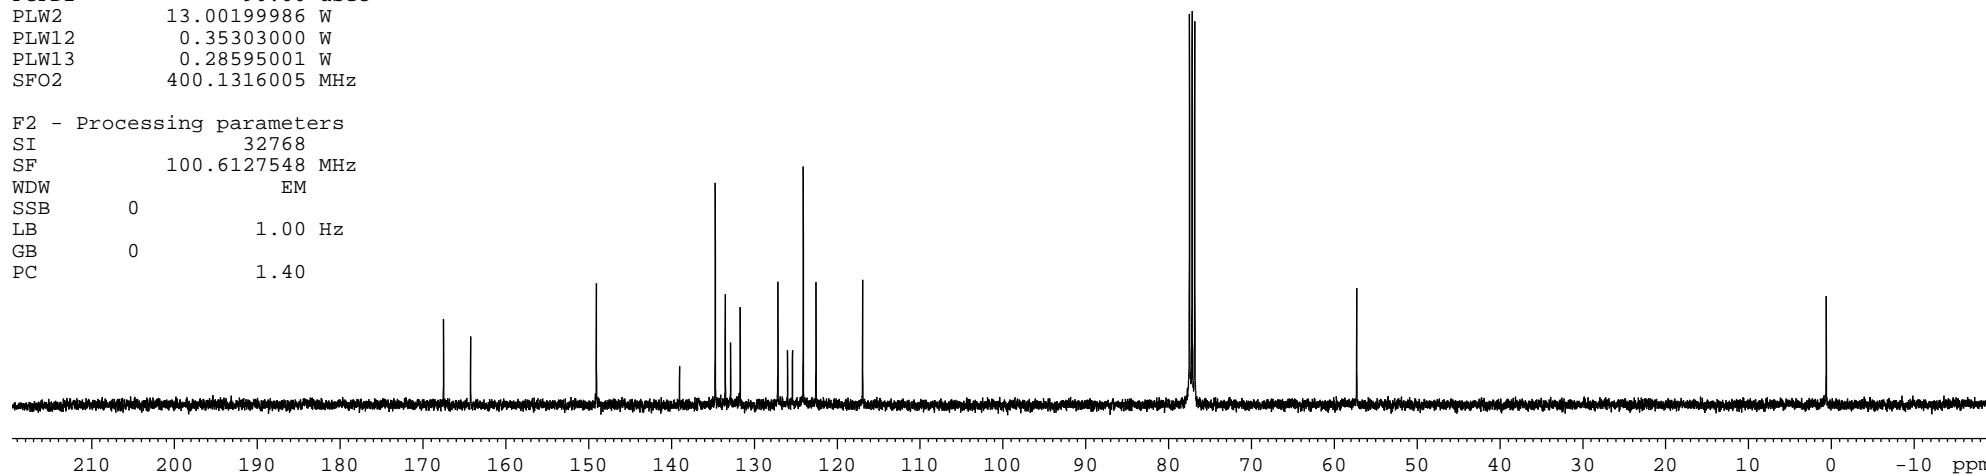

Current Data Parameters  
 NAME YXL-8-187-H-141120  
 EXPNO 10  
 PROCNO 1

F2 - Acquisition Parameters  
 Date\_ 20141120  
 Time 11.49  
 INSTRUM spect  
 PROBHD 5 mm PABBO BB/  
 PULPROG zg30  
 TD 65536  
 SOLVENT CDCl3  
 NS 16  
 DS 2  
 SWH 8012.820 Hz  
 FIDRES 0.122266 Hz  
 AQ 4.0894465 sec  
 RG 80.88  
 DW 62.400 usec  
 DE 6.50 usec  
 TE 297.0 K  
 D1 1.00000000 sec  
 TD0 1

==== CHANNEL f1 =====  
 SFO1 400.1324710 MHz  
 NUC1 1H  
 P1 8.78 usec  
 PLW1 19.00000000 W

F2 - Processing parameters  
 SI 65536  
 SF 400.1300093 MHz  
 WDW EM  
 SSB 0  
 LB 0.30 Hz  
 GB 0  
 PC 1.00

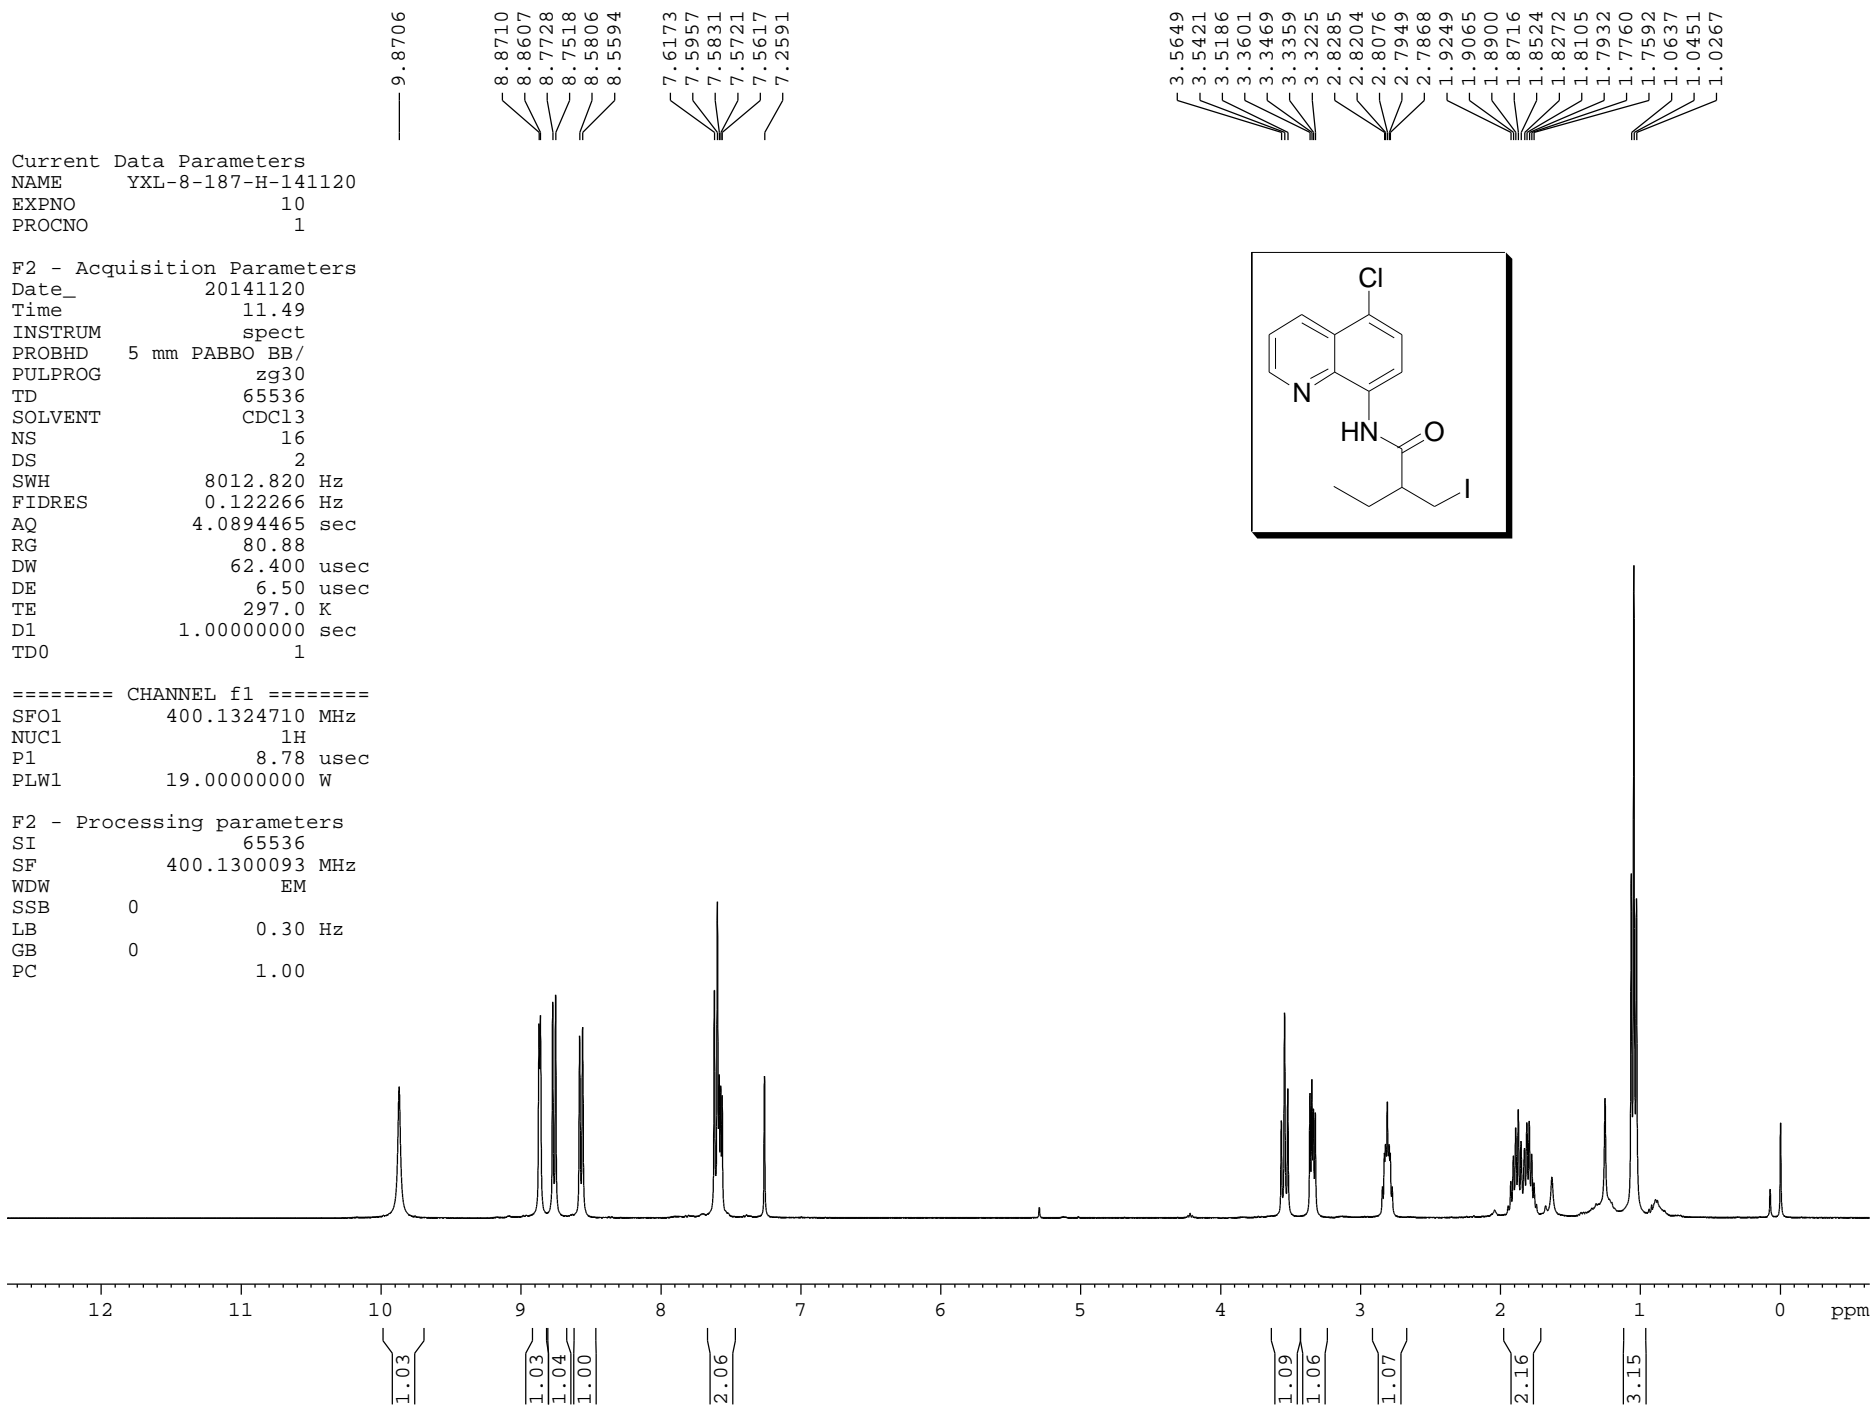

Current Data Parameters  
NAME YXL-8-187-C-141120  
EXPNO 10  
PROCNO 1

F2 - Acquisition Parameters  
Date\_ 20141121  
Time 1.30  
INSTRUM spect  
PROBHD 5 mm PABBO BB/  
PULPROG zgpg30  
TD 65536  
SOLVENT CDCl3  
NS 480  
DS 4  
SWH 24038.461 Hz  
FIDRES 0.366798 Hz  
AQ 1.3631488 sec  
RG 202.1  
DW 20.800 usec  
DE 6.50 usec  
TE 297.0 K  
D1 2.00000000 sec  
D11 0.03000000 sec  
TD0 1

==== CHANNEL f1 =====  
SFO1 100.6228293 MHz  
NUC1 13C  
P1 9.85 usec  
PLW1 65.00000000 W

==== CHANNEL f2 =====  
SFO2 400.1316005 MHz  
NUC2 1H  
CPDPRG[2] waltz16  
PCPD2 90.00 usec  
PLW2 19.00000000 W  
PLW12 0.18082000 W  
PLW13 0.14647000 W

F2 - Processing parameters  
SI 32768  
SF 100.6127561 MHz  
WDW EM  
SSB 0  
LB 1.00 Hz  
GB 0  
PC 1.40

171.77  
148.91  
139.12  
133.57  
133.41  
127.33  
126.08  
124.81  
122.53  
116.80  
77.48  
77.16  
76.85  
53.61  
27.33  
11.91  
5.50

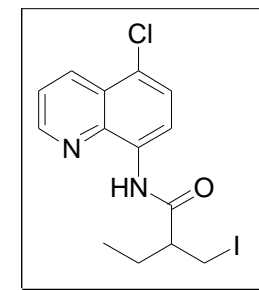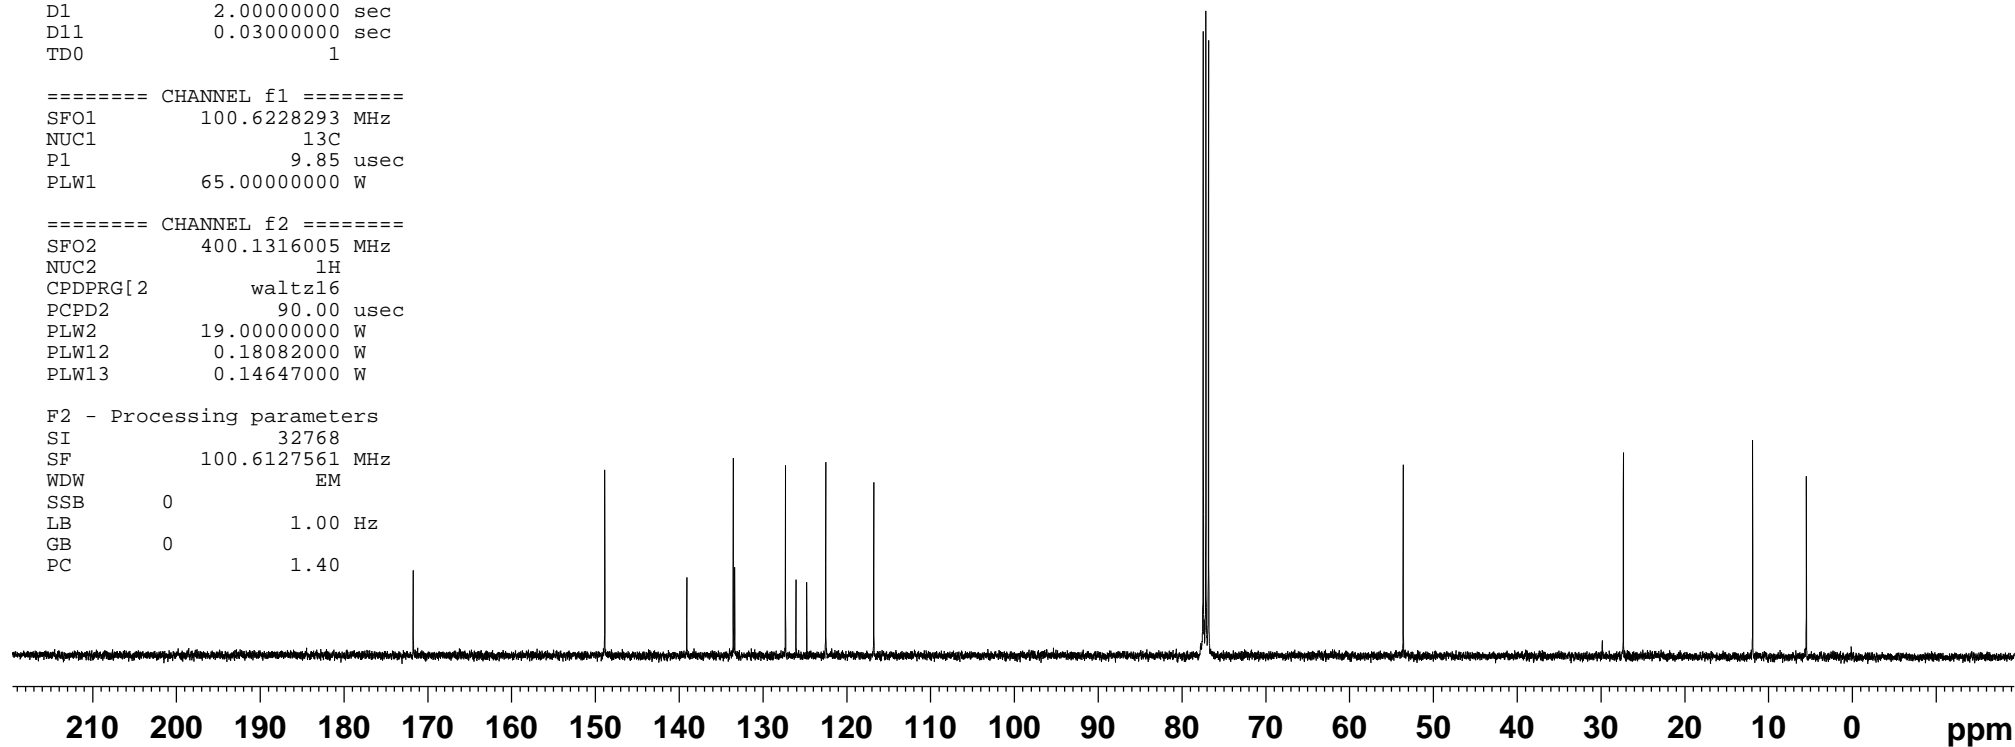

Current Data Parameters  
 NAME YXL-9-166-I-H-20150307  
 EXPNO 10  
 PROCNO 1

F2 - Acquisition Parameters  
 Date\_ 20150307  
 Time 21.06  
 INSTRUM spect  
 PROBHD 5 mm PABBO BB-  
 PULPROG zg30  
 TD 65536  
 SOLVENT CDCl3  
 NS 16  
 DS 2  
 SWH 8223.685 Hz  
 FIDRES 0.125483 Hz  
 AQ 3.9846387 sec  
 RG 85  
 DW 60.800 usec  
 DE 6.50 usec  
 TE 0 K  
 D1 1.00000000 sec  
 TD0 1

==== CHANNEL f1 =====  
 NUC1 1H  
 P1 14.83 usec  
 PLW1 13.00199986 W  
 SFO1 400.1324710 MHz

F2 - Processing parameters  
 SI 65536  
 SF 400.1300096 MHz  
 WDW EM  
 SSB 0  
 LB 0.30 Hz  
 GB 0  
 PC 1.00

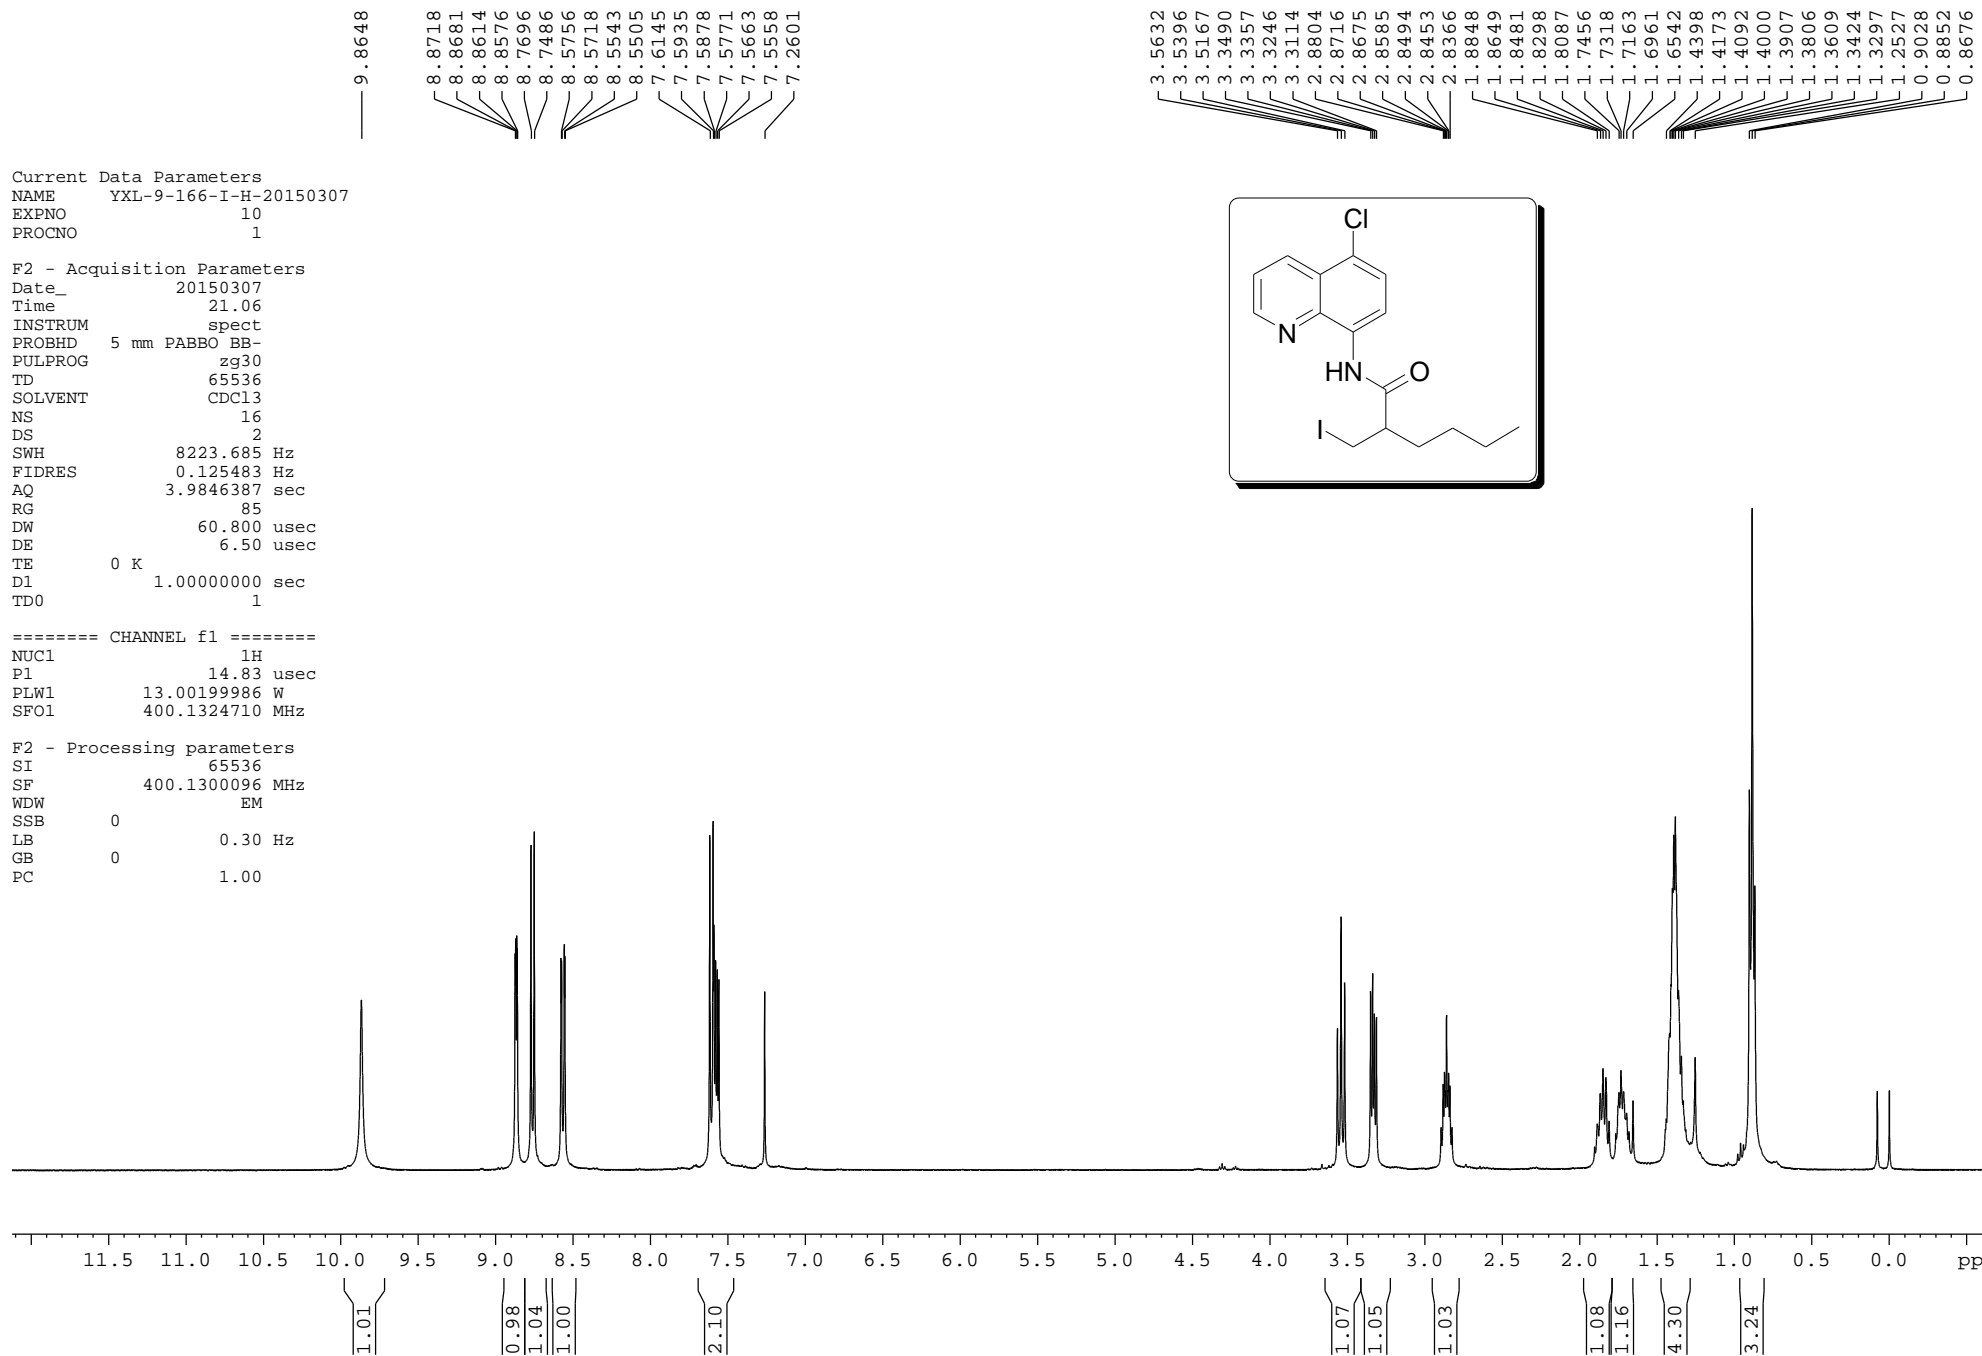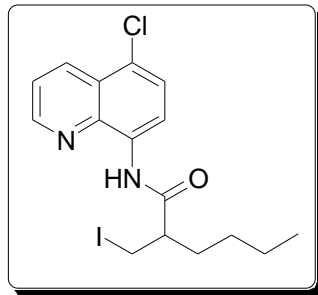



Current Data Parameters  
NAME YXL-9-166-I-C-20150307  
EXPNO 10  
PROCNO 1

F2 - Acquisition Parameters  
Date\_ 20150308  
Time 10.27  
INSTRUM spect  
PROBHD 5 mm PABBO BB-  
PULPROG zgpg30  
TD 65536  
SOLVENT CDCl3  
NS 400  
DS 4  
SWH 24038.461 Hz  
FIDRES 0.366798 Hz  
AQ 1.3631988 sec  
RG 209.25  
DW 20.800 usec  
DE 6.50 usec  
TE 0 K  
D1 2.00000000 sec  
D11 0.03000000 sec  
TD0 1

==== CHANNEL f1 =====  
NUC1 13C  
P1 10.59 usec  
PLW1 50.00299835 W  
SF01 100.6228293 MHz

==== CHANNEL f2 =====  
CPDPRG2 waltz16  
NUC2 1H  
PCPD2 90.00 usec  
PLW2 13.00199986 W  
PLW12 0.35303000 W  
PLW13 0.28595001 W  
SFO2 400.1316005 MHz

F2 - Processing parameters  
SI 32768  
SF 100.6127566 MHz  
WDW EM  
SSB 0  
LB 1.00 Hz  
GB 0  
PC 1.40

— 171.89

— 148.90

— 139.14

— 133.53

— 133.43

— 127.32

— 126.08

— 124.79

— 122.50

— 116.81

— 77.47

— 77.16

— 76.84

— 52.19

— 33.91

— 29.54

— 22.71

— 13.94

— 5.87

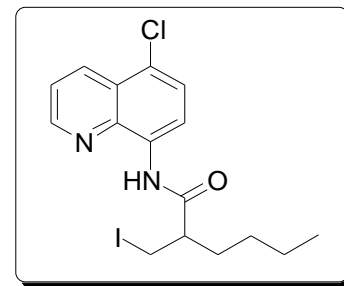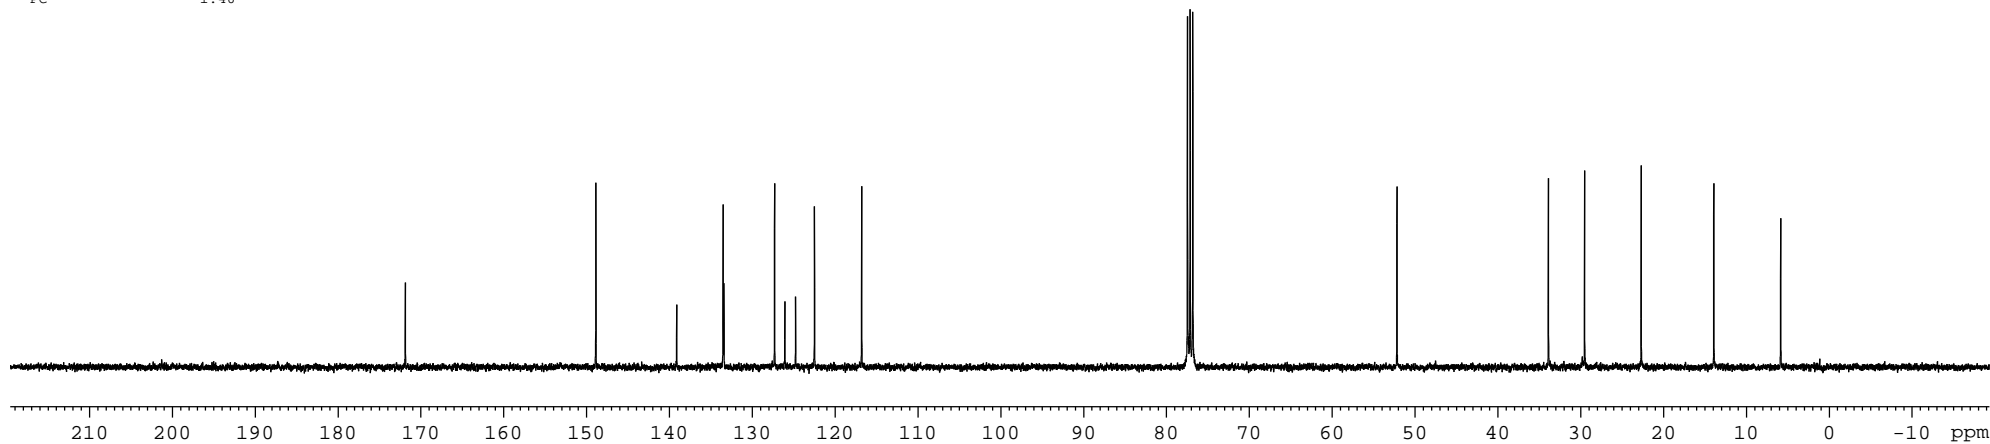

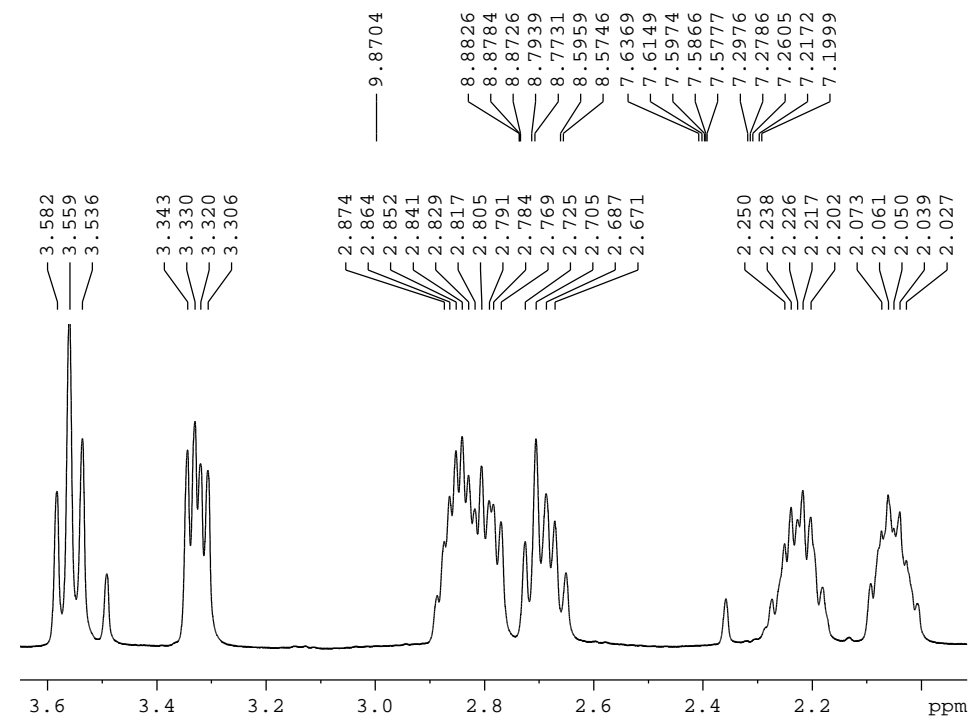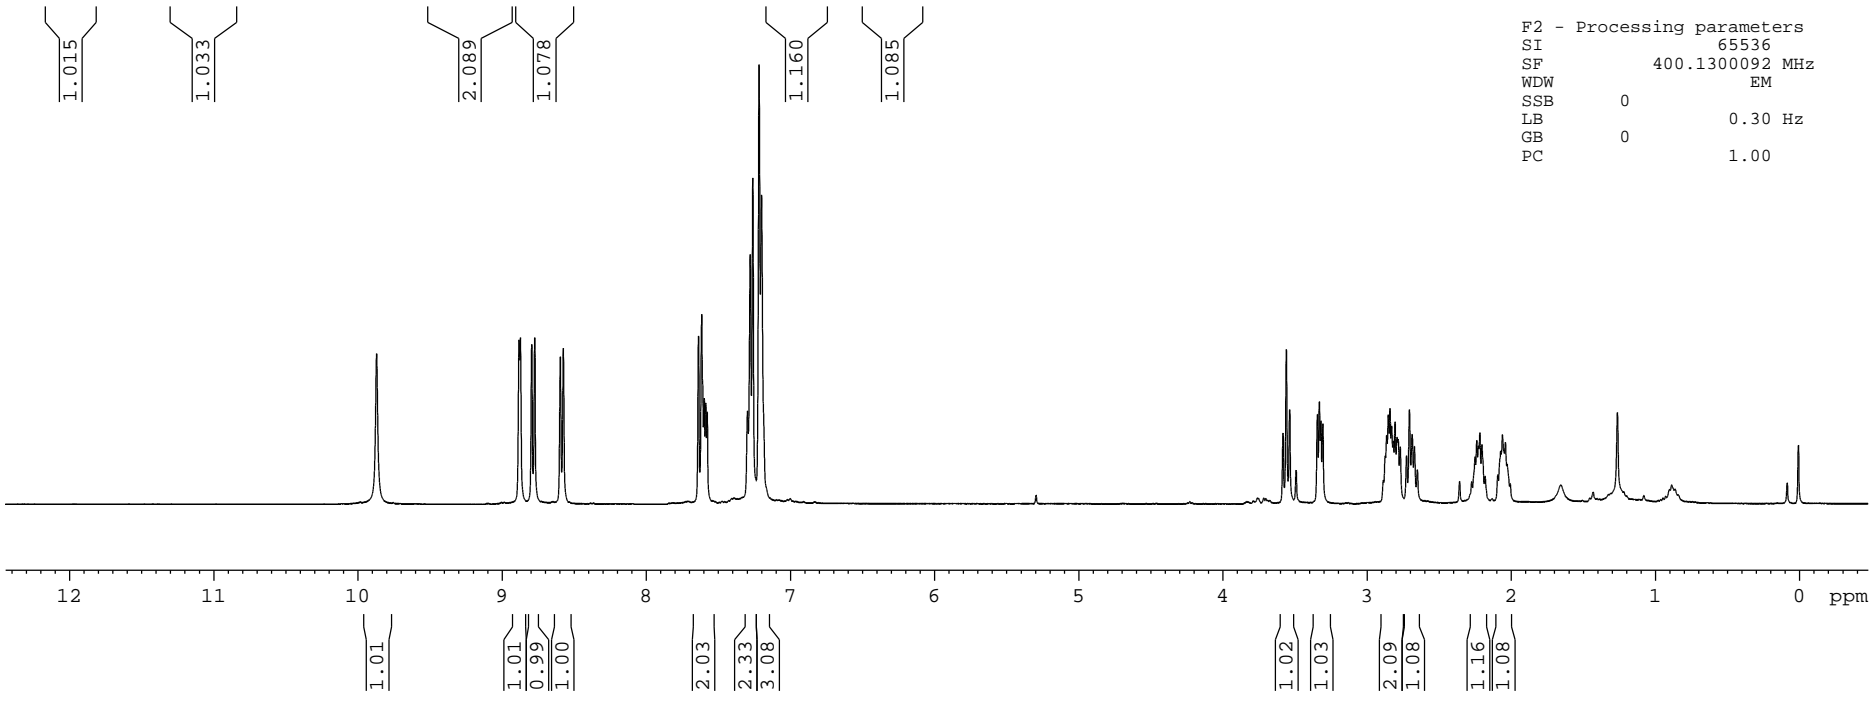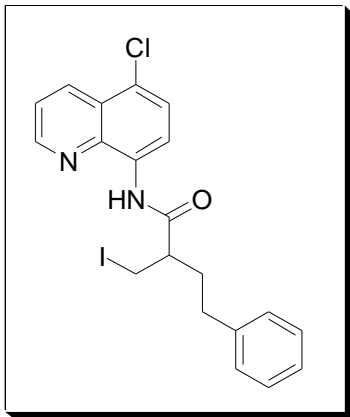

Current Data Parameters  
 NAME YXL-8-139-3-H-141030  
 EXPNO 10  
 PROCNO 1

F2 - Acquisition Parameters  
 Date\_ 20141030  
 Time 20.05  
 INSTRUM spect  
 PROBHD 5 mm PABBO BB/  
 PULPROG zg30  
 TD 65536  
 SOLVENT CDCl3  
 NS 16  
 DS 2  
 SWH 8012.820 Hz  
 FIDRES 0.122266 Hz  
 AQ 4.0894465 sec  
 RG 57.28  
 DW 62.400 usec  
 DE 6.50 usec  
 TE 297.0 K  
 D1 1.00000000 sec  
 TDO 1

==== CHANNEL f1 =====  
 SFO1 400.1324710 MHz  
 NUC1 1H  
 P1 8.78 usec  
 PLW1 19.00000000 W

F2 - Processing parameters  
 SI 65536  
 SF 400.1300092 MHz  
 WDW EM  
 SSB 0  
 LB 0.30 Hz  
 GB 0  
 PC 1.00

Current Data Parameters  
NAME YXL-8-139-3-C-141030  
EXPNO 10  
PROCNO 1

F2 - Acquisition Parameters

Date\_ 20141031  
Time 1.30  
INSTRUM spect  
PROBHD 5 mm PABBO BB/  
PULPROG zgpg30  
TD 65536  
SOLVENT CDCl3  
NS 480  
DS 4  
SWH 24038.461 Hz  
FIDRES 0.366798 Hz  
AQ 1.3631488 sec  
RG 202.1  
DW 20.800 usec  
DE 6.50 usec  
TE 297.0 K  
D1 2.00000000 sec  
D11 0.03000000 sec  
TD0 1

==== CHANNEL f1 =====  
SFO1 100.6228293 MHz  
NUC1 13C  
P1 9.85 usec  
PLW1 65.00000000 W

==== CHANNEL f2 =====  
SFO2 400.1316005 MHz  
NUC2 1H  
CPDPRG[2] waltz16  
PCPD2 90.00 usec  
PLW2 19.00000000 W  
PLW12 0.18082000 W  
PLW13 0.14647000 W

F2 - Processing parameters

SI 32768  
SF 100.6127586 MHz  
WDW EM  
SSB 0  
LB 1.00 Hz  
GB 0  
PC 1.40

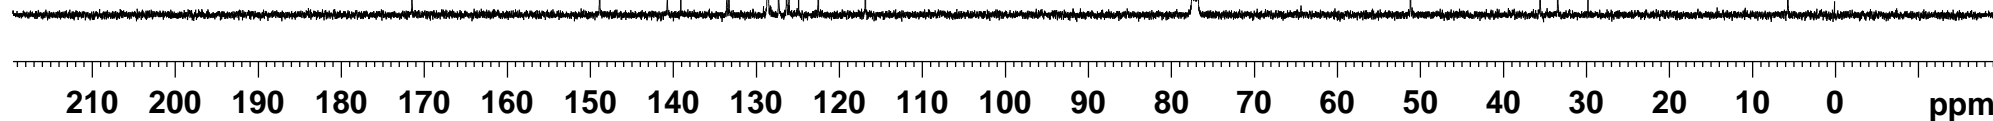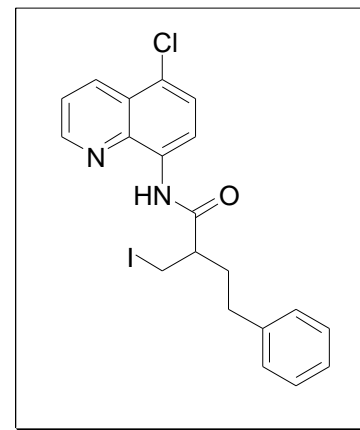

10.007  
 3.962  
 3.936  
 3.916  
 3.853  
 3.839  
 3.826  
 3.812  
 8.873  
 8.727  
 8.706  
 8.581  
 8.560  
 7.618  
 7.598  
 7.581  
 7.571  
 7.258  
 3.602  
 3.579  
 3.559  
 3.491  
 3.476  
 3.451  
 3.232  
 3.216  
 3.200  
 3.962  
 3.936  
 3.916  
 3.853  
 3.839  
 3.826  
 3.812  
 3.602  
 3.579  
 3.559  
 3.491  
 3.476  
 3.451  
 3.232  
 3.216  
 3.200

Current Data Parameters  
 NAME syh-6-241  
 EXPNO 10  
 PROCNO 1

F2 - Acquisition Parameters  
 Date\_ 20141212  
 Time 10.24  
 INSTRUM spect  
 PROBHD 5 mm PABBO BB/  
 PULPROG zg30  
 TD 65536  
 SOLVENT CDCl3

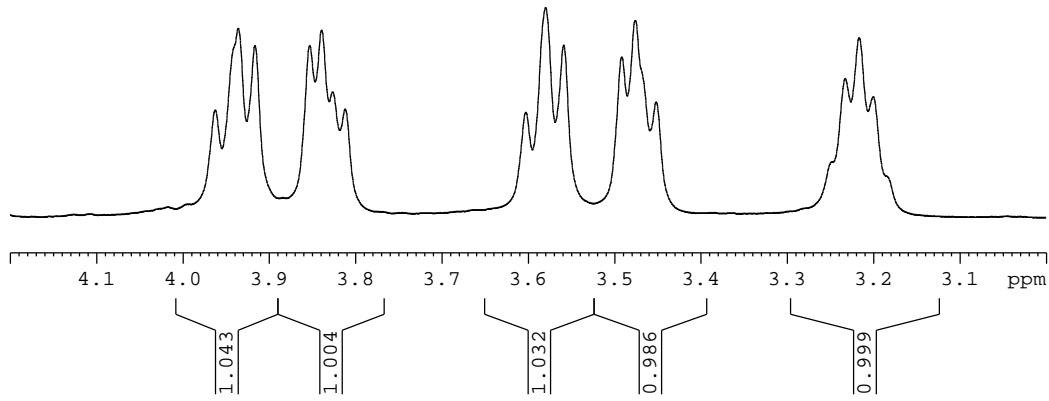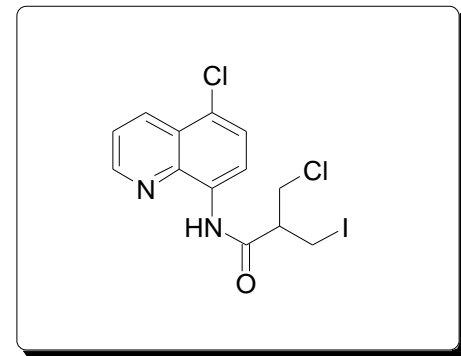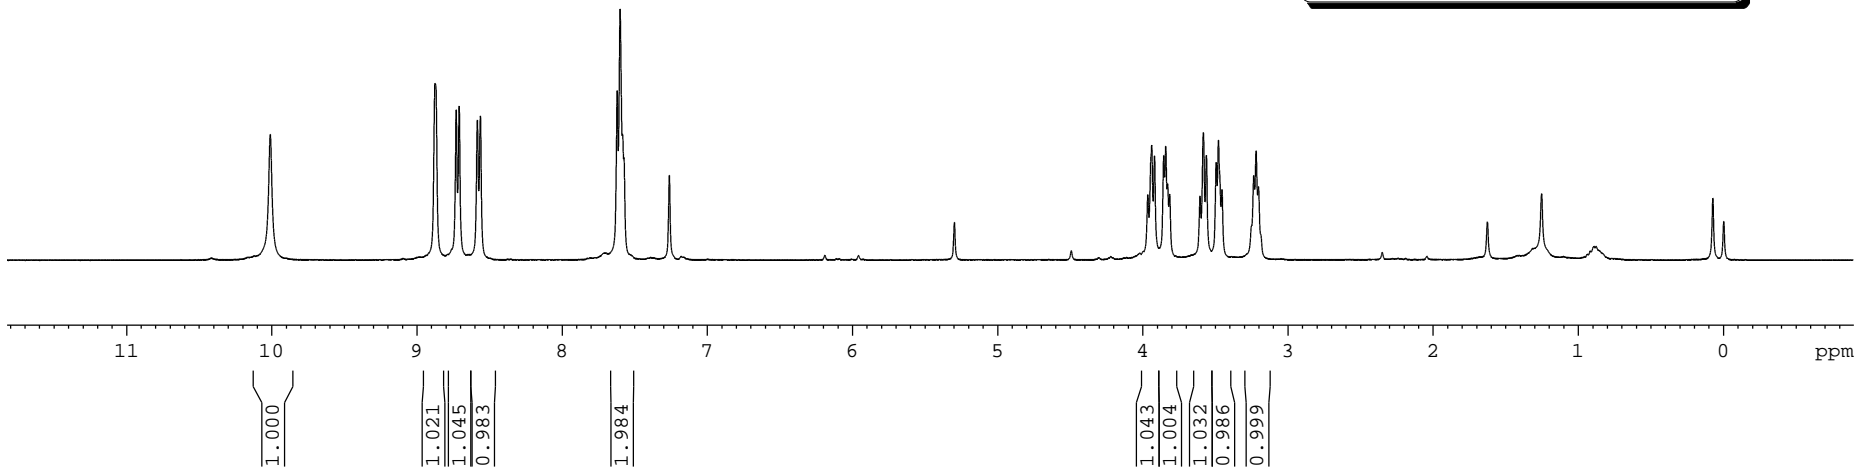

— 168.48  
— 149.04  
— 139.06  
— 133.61  
— 133.06  
— 127.25  
— 126.08  
— 125.32  
— 122.65  
— 117.00

77.48  
77.16  
76.84

— 53.58  
— 45.10

— 1.37

Current Data Parameters  
NAME syh-6-241-c  
EXPNO 10  
PROCNO 1

F2 - Acquisition Parameters  
Date\_ 20141212  
Time 13.38  
INSTRUM spect  
PROBHD 5 mm PABBO BB/  
PULPROG zgpg30  
TD 65536  
SOLVENT CDC13

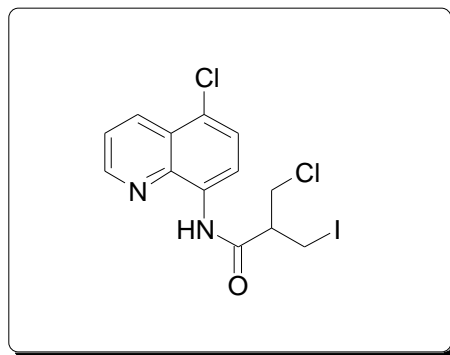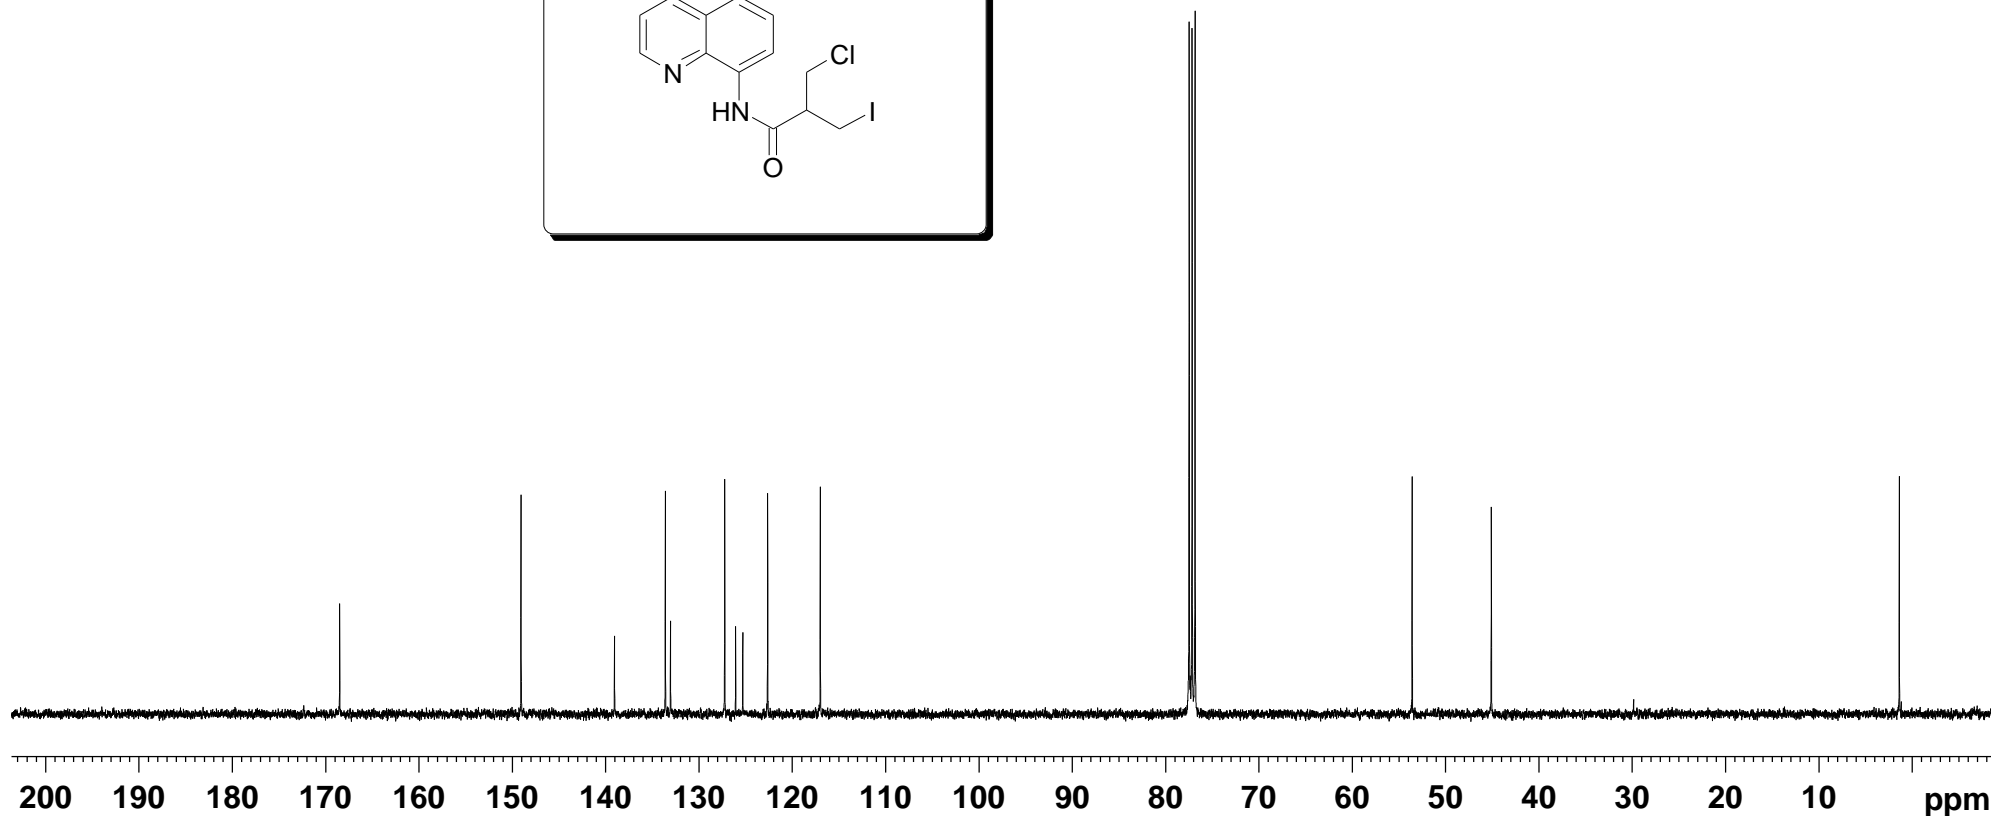

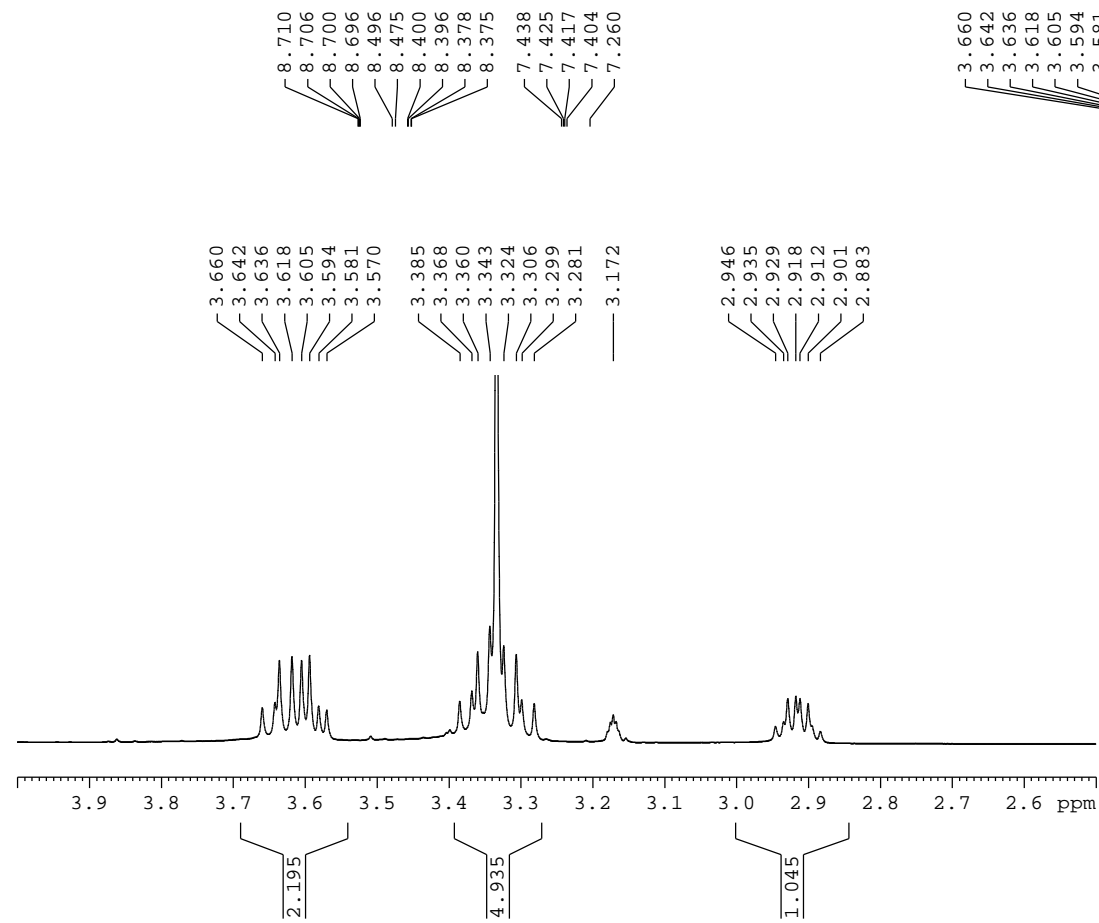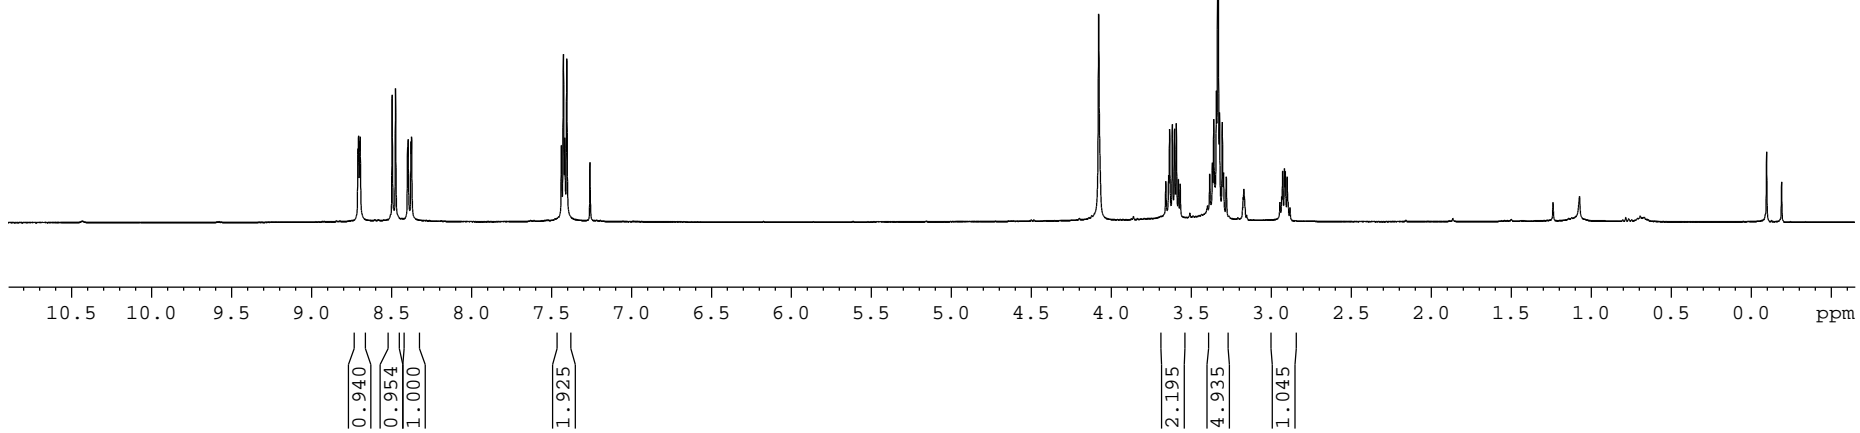

3.660  
3.642  
3.636  
3.618  
3.605  
3.594  
3.581  
3.570  
3.385  
3.368  
3.360  
3.343  
3.324  
3.306  
3.299  
3.281  
3.172  
2.946  
2.935  
2.929  
2.918  
2.912  
2.901  
2.883

Current Data Parameters  
 NAME syh-6-285-2  
 EXPNO 30  
 PROCNO 1

F2 - Acquisition Parameters  
 Date\_ 20141226  
 Time 15.14  
 INSTRUM spect  
 PROBHD 5 mm PABBO BB/  
 PULPROG zg30  
 TD 65536  
 SOLVENT MeOD

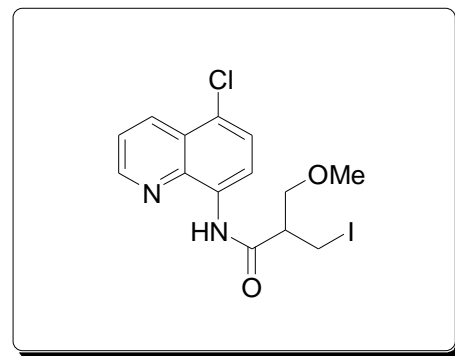

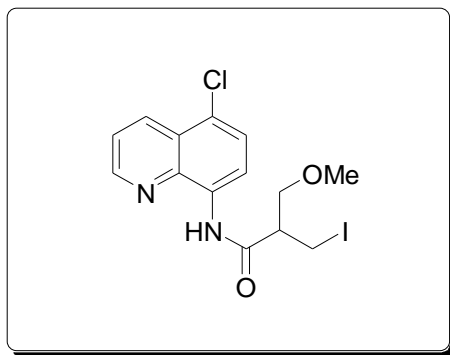

— 170.03  
 — 148.83  
 — 139.02  
 — 133.26  
 — 133.13  
 — 126.80  
 — 125.81  
 — 124.77  
 — 122.31  
 — 116.70

— 77.48  
 — 77.16  
 — 76.84  
 — 72.96  
 — 58.96  
 — 50.34  
 — 48.55

— 0.77

Current Data Parameters  
 NAME syh-6-285-2-c  
 EXPNO 30  
 PROCNO 1

F2 - Acquisition Parameters  
 Date\_ 20141227  
 Time 1.28  
 INSTRUM spect  
 PROBHD 5 mm PABBO BB/  
 PULPROG zgpg30  
 TD 65536  
 SOLVENT MeOD

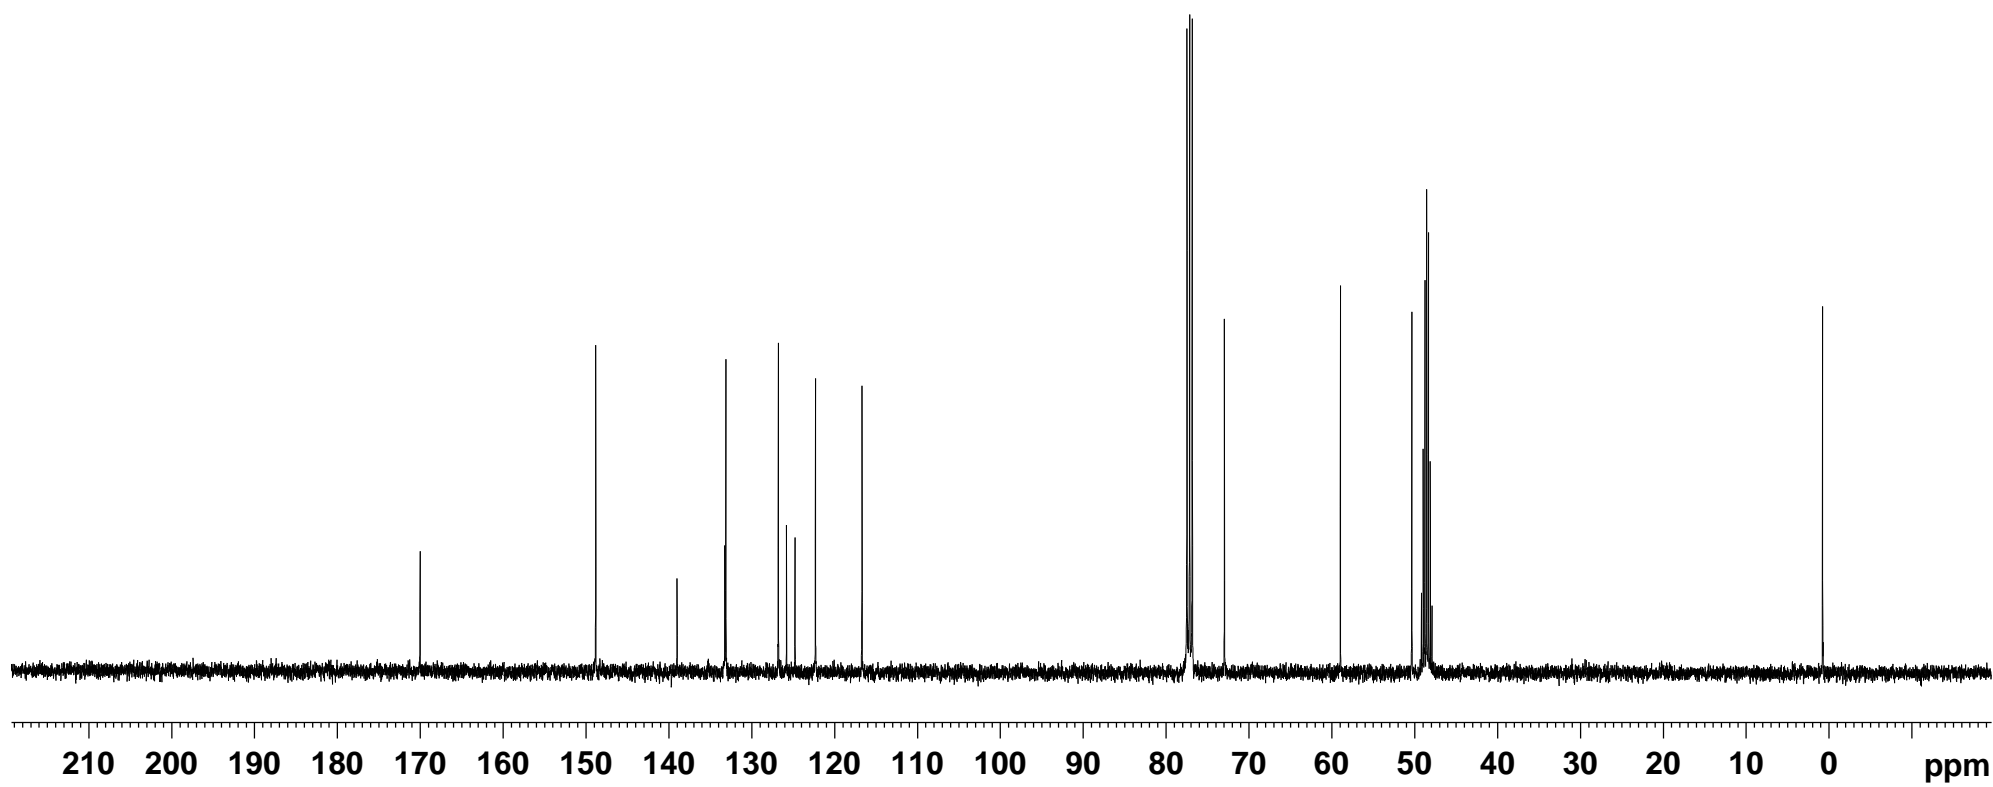

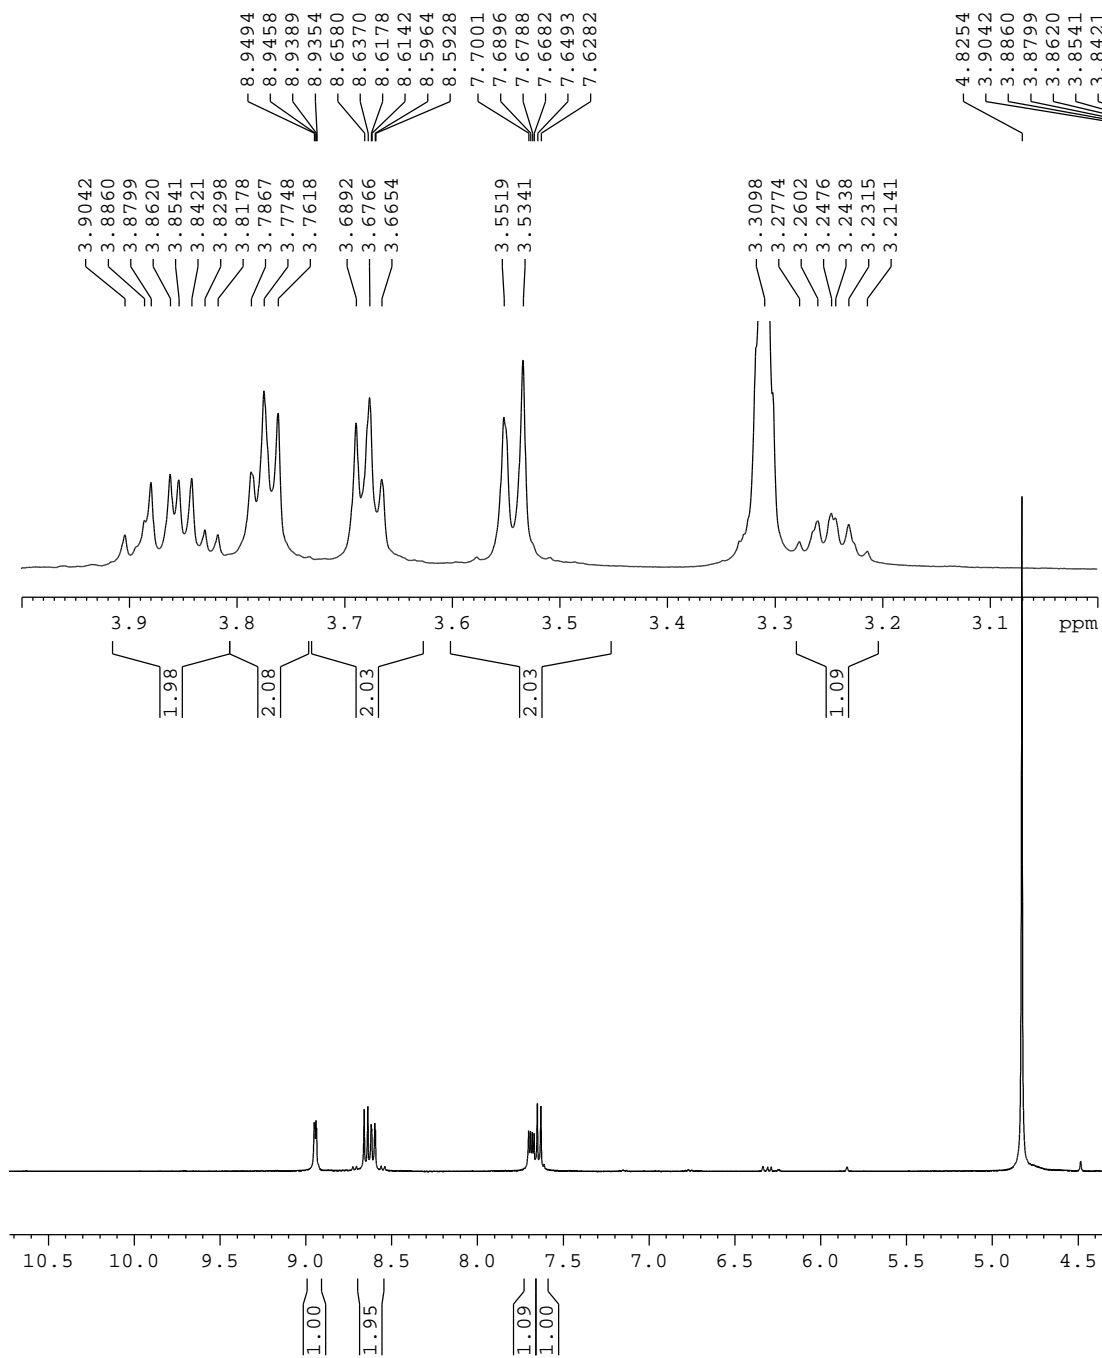

4.8254  
 3.9042  
 3.8860  
 3.8799  
 3.8620  
 3.8541  
 3.8421  
 3.8298  
 3.8178  
 3.7867  
 3.7748  
 3.7618  
 3.6892  
 3.6766  
 3.6654  
 3.5519  
 3.5341  
 3.3098  
 3.2774  
 3.2602  
 3.2476  
 3.2438  
 3.2315  
 3.2141

Current Data Parameters  
 NAME SYH-7-229  
 EXPNO 10  
 PROCNO 1

F2 - Acquisition Parameters  
 Date\_ 20150421  
 Time 17.11  
 INSTRUM spect  
 PROBHD 5 mm PABBO BB-  
 PULPROG zg30  
 TD 65536  
 SOLVENT MeOD  
 NS 16

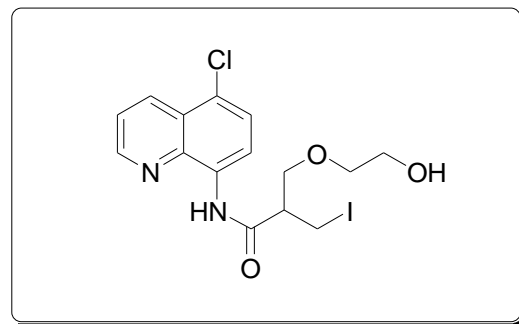



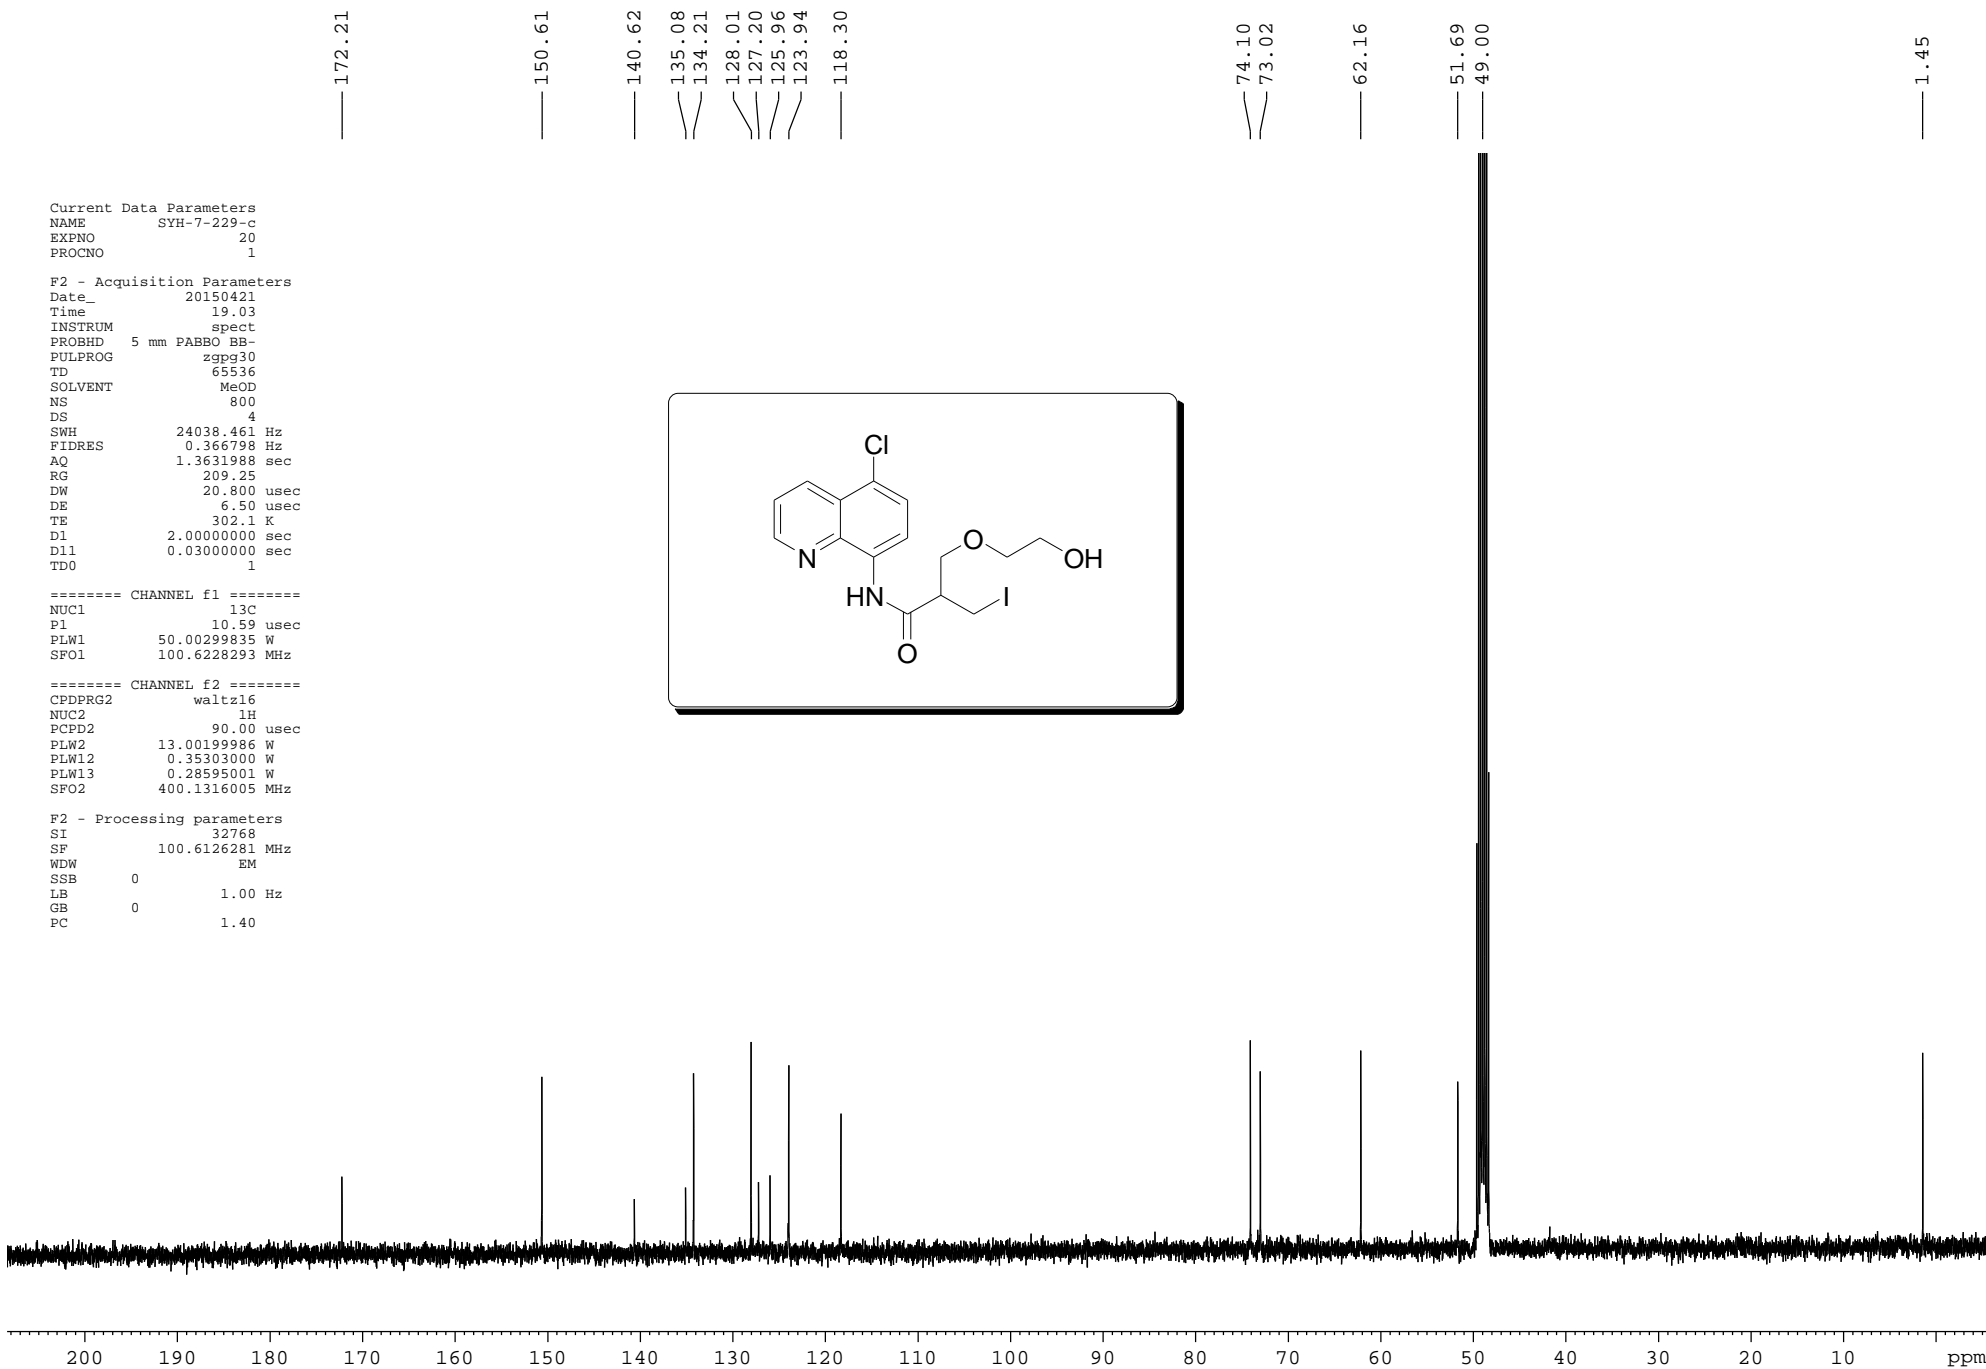

Current Data Parameters  
 NAME SYH-7-229-c  
 EXPNO 20  
 PROCNO 1

F2 - Acquisition Parameters  
 Date\_ 20150421  
 Time 19.03  
 INSTRUM spect  
 PROBHD 5 mm PABBO BB-  
 PULPROG zgpg30  
 TD 65536  
 SOLVENT MeOD  
 NS 800  
 DS 4  
 SWH 24038.461 Hz  
 FIDRES 0.366798 Hz  
 AQ 1.3631988 sec  
 RG 209.25  
 DW 20.800 usec  
 DE 6.50 usec  
 TE 302.1 K  
 D1 2.00000000 sec  
 D11 0.03000000 sec  
 TD0 1

===== CHANNEL f1 =====  
 NUC1 13C  
 P1 10.59 usec  
 PLW1 50.00299835 W  
 SFO1 100.6228293 MHz

===== CHANNEL f2 =====  
 CPDPRG2 waltz16  
 NUC2 1H  
 FCPD2 90.00 usec  
 PLW2 13.00199986 W  
 PLW12 0.35303000 W  
 PLW13 0.28595001 W  
 SFO2 400.1316005 MHz

F2 - Processing parameters  
 SI 32768  
 SF 100.6126281 MHz  
 WDW EM  
 SSB 0  
 LB 1.00 Hz  
 GB 0  
 PC 1.40

Current Data Parameters  
 NAME YXL-9-95-2-H-150124  
 EXPNO 10  
 PROCNO 1

F2 - Acquisition Parameters  
 Date\_ 20150124  
 Time 16.23  
 INSTRUM spect  
 PROBHD 5 mm PABBO BB/  
 PULPROG zg30  
 TD 65536  
 SOLVENT CDCl3  
 NS 16  
 DS 2  
 SWH 8012.820 Hz  
 FIDRES 0.122266 Hz  
 AQ 4.0894465 sec  
 RG 73.55  
 DW 62.400 usec  
 DE 6.50 usec  
 TE 298.0 K  
 D1 1.00000000 sec  
 TD0 1

==== CHANNEL f1 =====  
 SFO1 400.1324710 MHz  
 NUC1 1H  
 P1 8.78 usec  
 PLW1 19.00000000 W

F2 - Processing parameters  
 SI 65536  
 SF 400.1300099 MHz  
 WDW EM  
 SSB 0  
 LB 0.30 Hz  
 GB 0  
 PC 1.00

9.9057  
 8.7765  
 8.7733  
 8.7663  
 8.7631  
 8.7449  
 8.7240  
 8.5509  
 8.5477  
 8.5297  
 8.5265  
 7.9044  
 7.8859  
 7.6070  
 7.5860  
 7.5557  
 7.5451  
 7.5344  
 7.5239  
 7.5082  
 7.4898  
 7.4713  
 7.3855  
 7.3661  
 7.3472  
 7.2592

3.6067  
 3.5833  
 3.5602  
 3.3942  
 3.3808  
 3.3696  
 3.3562  
 3.1880  
 3.1704  
 3.1611  
 3.1440  
 3.1359  
 3.1266  
 3.1175  
 3.0996  
 3.0866  
 3.0808  
 3.0739  
 3.0660  
 3.0556  
 2.2762  
 2.2585  
 2.2413  
 2.2237

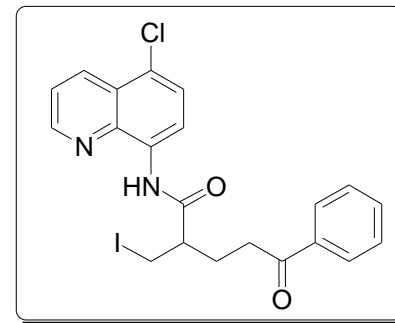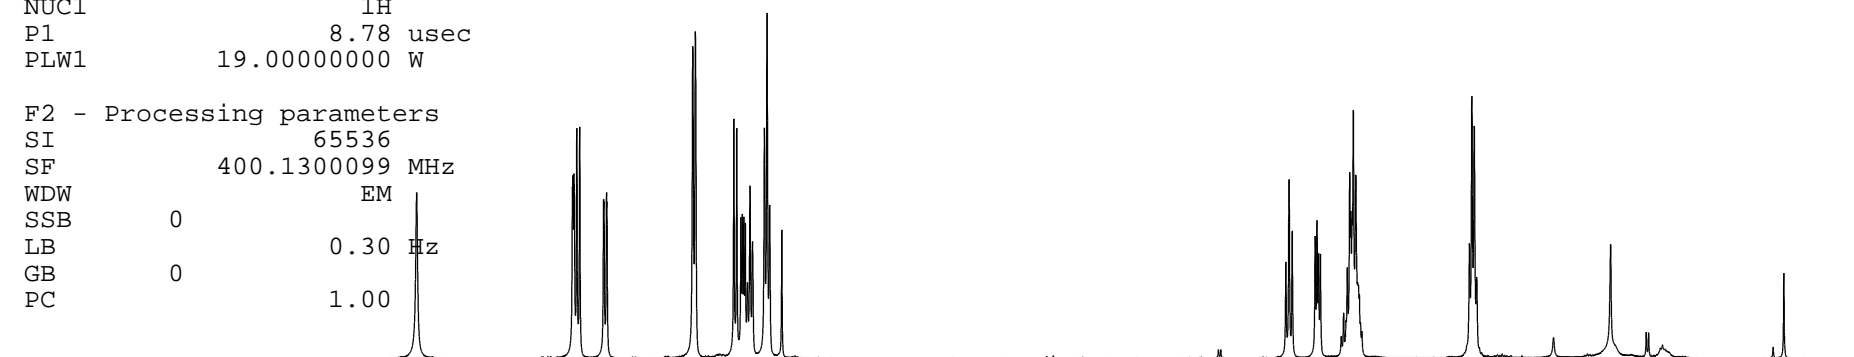

1.01  
 2.02  
 1.00  
 2.02  
 1.03  
 2.11  
 2.05  
 1.04  
 1.05  
 3.14  
 2.09

199.03

171.31

148.93

139.08  
136.68  
133.46  
133.32  
133.27  
128.67  
128.13  
127.22  
126.03  
124.99  
122.52  
116.90

77.48  
77.16  
76.84

50.69

35.49

28.31

5.06

Current Data Parameters  
NAME YXL-9-95-2-c-150124  
EXPNO 10  
PROCNO 1

F2 - Acquisition Parameters

Date\_ 20150124  
Time\_ 16.37  
INSTRUM spect  
PROBHD 5 mm PABBO BB/  
PULPROG zgpg30  
TD 65536  
SOLVENT CDCl3  
NS 95  
DS 4  
SWH 24038.461 Hz  
FIDRES 0.366798 Hz  
AQ 1.3631488 sec  
RG 202.1  
DW 20.800 usec  
DE 6.50 usec  
TE 298.1 K  
D1 2.0000000 sec  
D11 0.03000000 sec  
TD0 1

==== CHANNEL f1 =====  
SFO1 100.6228293 MHz  
NUC1 13C  
P1 9.85 usec  
PLW1 65.00000000 W

==== CHANNEL f2 =====  
SFO2 400.1316005 MHz  
NUC2 1H  
CPDPRG[2] waltz16  
PCPD2 90.00 usec  
PLW2 19.00000000 W  
PLW12 0.18082000 W  
PLW13 0.14647000 W

F2 - Processing parameters  
SI 32768  
SF 100.6127574 MHz  
WDW EM  
SSB 0  
LB 1.00 Hz  
GB 0  
PC 1.40

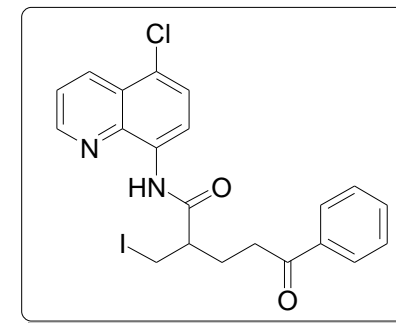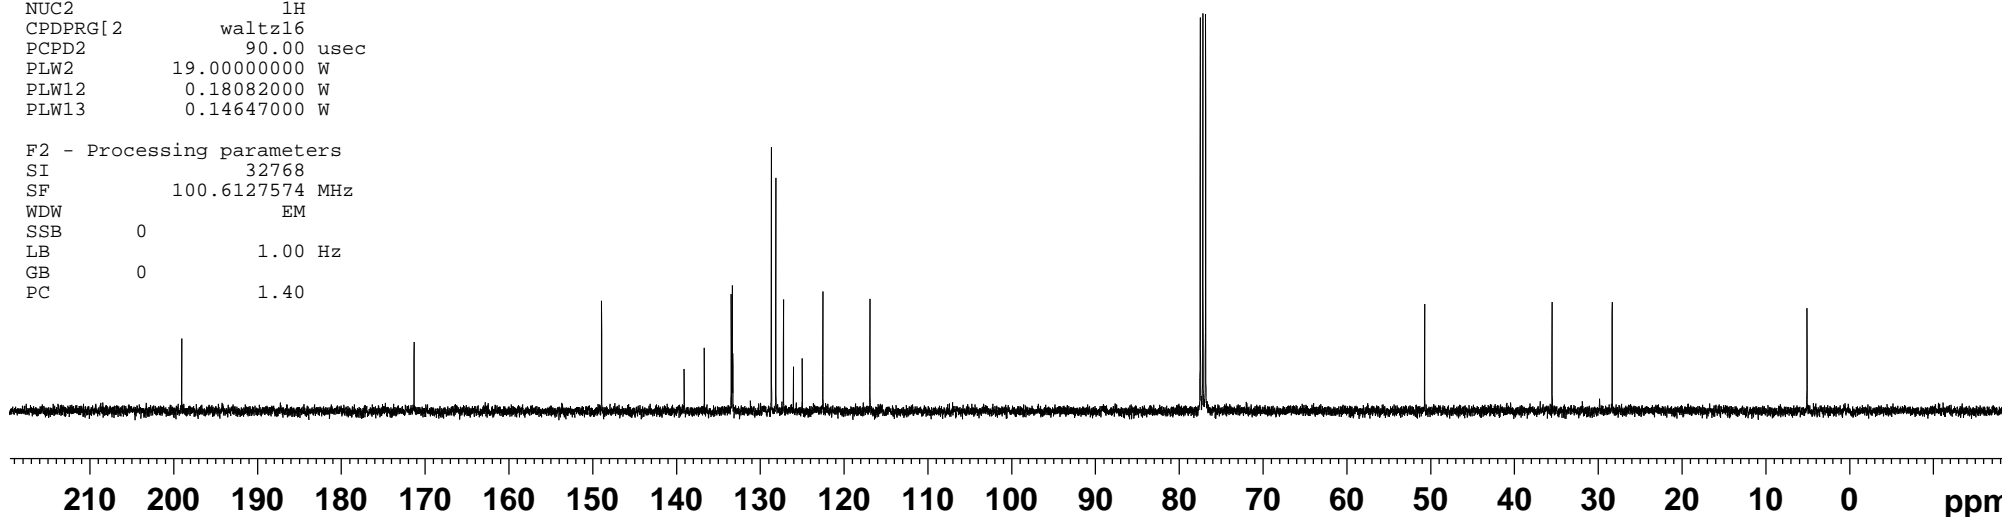

Current Data Parameters  
 NAME YXL-8-137-2-H-20141031  
 EXPNO 10  
 PROCNO 1

F2 - Acquisition Parameters

Date\_ 20141031  
 Time 22.41  
 INSTRUM spect  
 PROBHD 5 mm PABBO BB-  
 PULPROG zg30  
 TD 65536  
 SOLVENT CDCl3  
 NS 16  
 DS 2  
 SWH 8223.685 Hz  
 FIDRES 0.125483 Hz  
 AQ 3.9846387 sec  
 RG 115.38  
 DW 60.800 usec  
 DE 6.50 usec  
 TE 296.5 K  
 D1 1.00000000 sec  
 TD0 1

==== CHANNEL f1 =====  
 NUC1 1H  
 P1 14.83 usec  
 PLW1 13.00199986 W  
 SFO1 400.1324710 MHz

F2 - Processing parameters

SI 65536  
 SF 400.1300102 MHz  
 WDW EM  
 SSB 0  
 LB 0.30 Hz  
 GB 0  
 PC 1.00

9.6610  
 8.7761  
 8.7727  
 8.7657  
 8.7624  
 8.7289  
 8.7079  
 8.5417  
 8.5383  
 8.5205  
 8.5170  
 7.5983  
 7.5773  
 7.5498  
 7.5393  
 7.5285  
 7.5180  
 7.2597  
 7.2463  
 7.2383  
 7.2336  
 7.2130  
 7.1677  
 7.1607  
 7.1526  
 7.1463  
 7.1393

3.5837  
 3.5751  
 3.5626  
 3.5594  
 3.5518  
 3.5386  
 3.3683  
 3.3565  
 3.3436  
 3.3320  
 3.1872  
 3.1684  
 3.1560  
 3.1432  
 3.1312  
 3.1194  
 3.1123  
 3.0732  
 3.0568  
 3.0471  
 3.0308  
 3.0218  
 2.3559  
 2.1776  
 2.1716  
 1.6482  
 1.2595

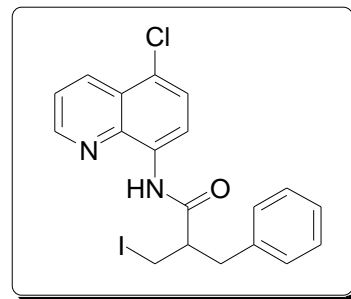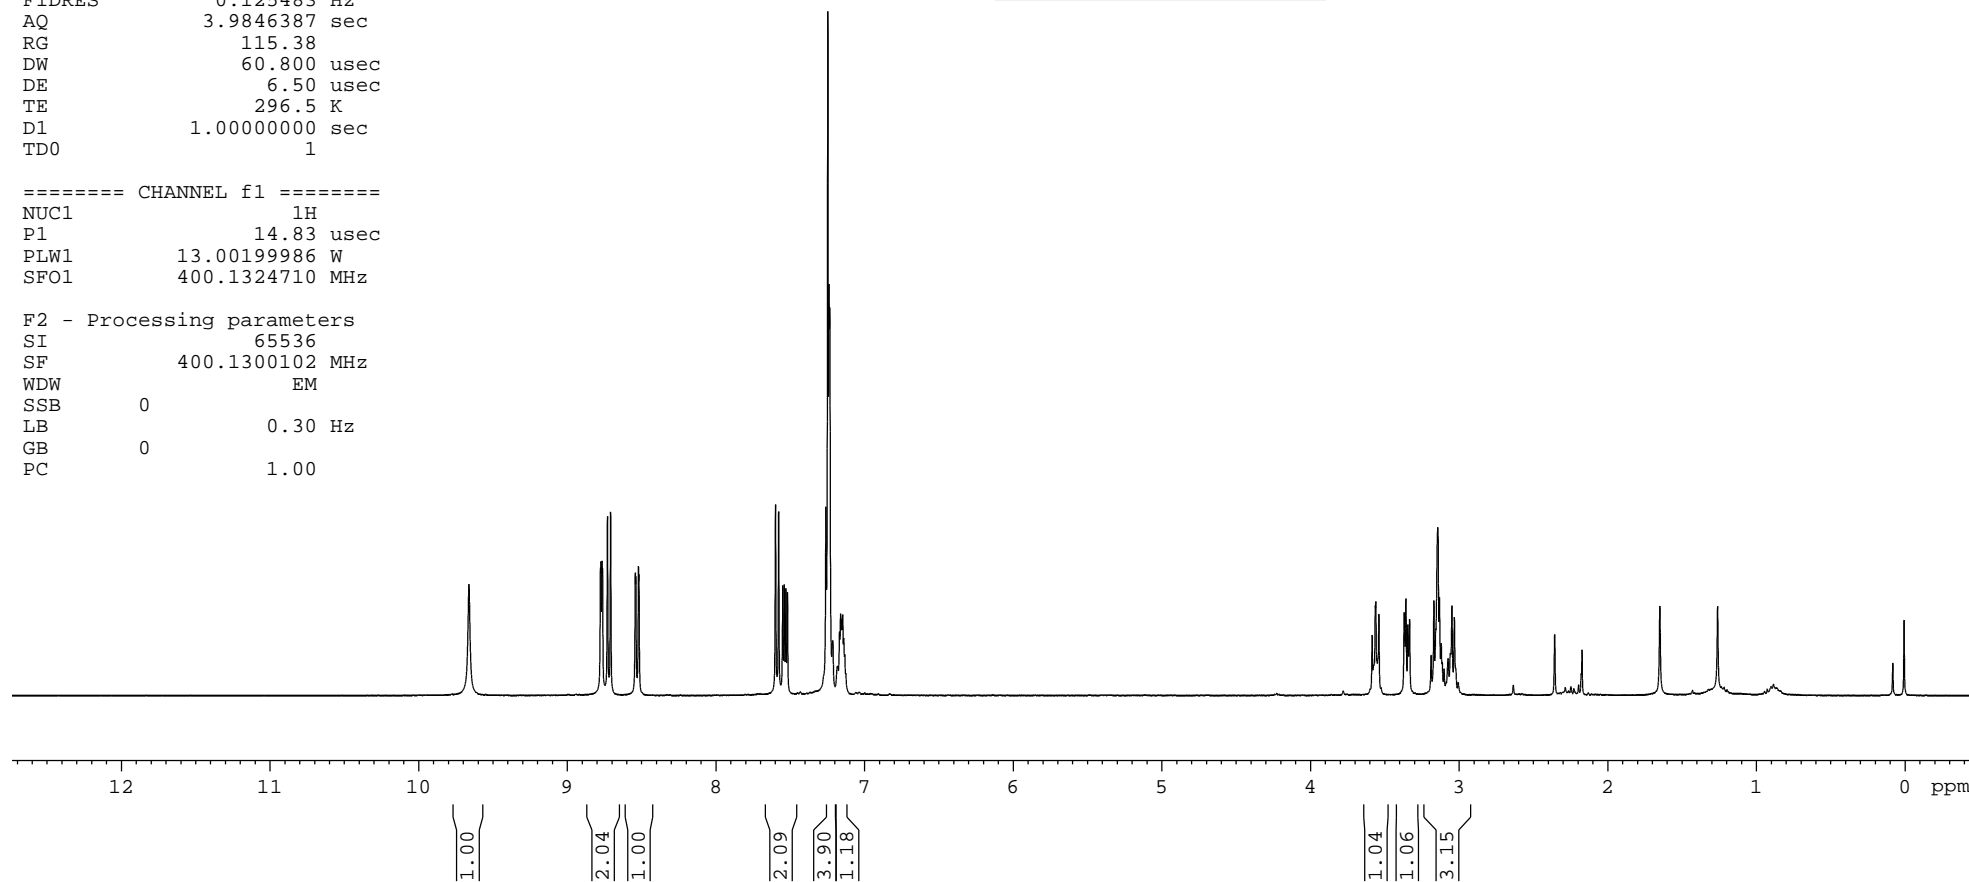

Current Data Parameters  
 NAME YXL-8-137-2-C-20141031  
 EXPNO 20  
 PROCNO 1

F2 - Acquisition Parameters  
 Date\_ 20141101  
 Time 9.04  
 INSTRUM spect  
 PROBHD 5 mm PABBO BB-  
 PULPROG zgpg30  
 TD 65536  
 SOLVENT CDCl3  
 NS 480  
 DS 4  
 SWH 24038.461 Hz  
 FIDRES 0.366798 Hz  
 AQ 1.3631988 sec  
 RG 209.25  
 DW 20.800 usec  
 DE 6.50 usec  
 TE 298.1 K  
 D1 2.00000000 sec  
 D11 0.03000000 sec  
 TD0 1

==== CHANNEL f1 =====  
 NUC1 13C  
 P1 10.59 usec  
 PLW1 50.00299835 W  
 SFO1 100.6228293 MHz

==== CHANNEL f2 =====  
 CPDPRG2 waltz16  
 NUC2 1H  
 PCPD2 90.00 usec  
 PLW2 13.00199986 W  
 PLW12 0.35303000 W  
 PLW13 0.28595001 W  
 SFO2 400.1316005 MHz

F2 - Processing parameters  
 SI 32768  
 SF 100.6127569 MHz  
 WDW EM  
 SSB 0  
 LB 1.00 Hz  
 GB 0  
 PC 1.40

171.02

148.75  
 139.01  
 137.94  
 133.43  
 133.26  
 129.03  
 128.84  
 127.27  
 126.96  
 125.98  
 124.81  
 122.45  
 116.76

77.48  
 77.17  
 76.85

53.83

39.93

5.29

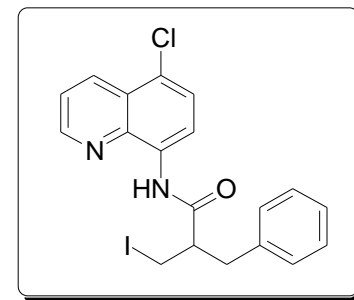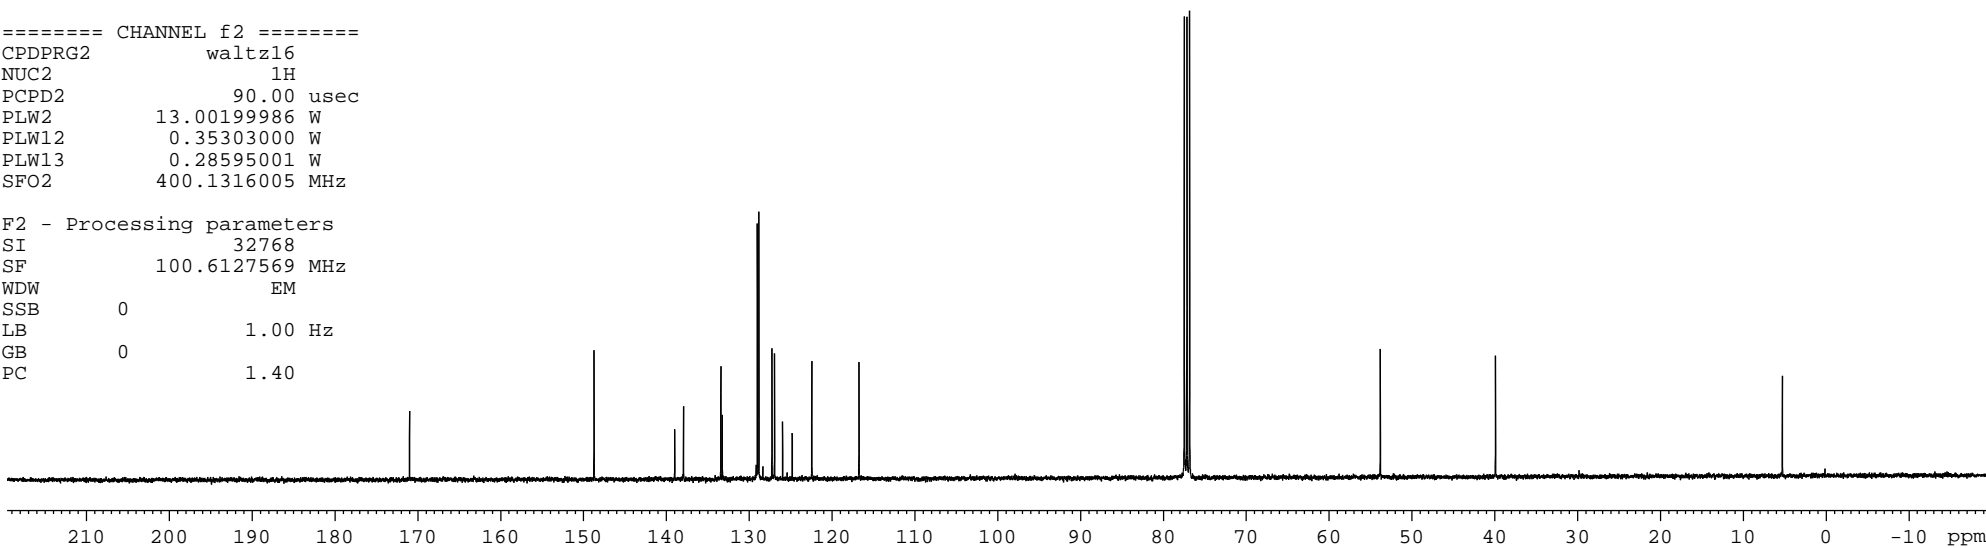

Current Data Parameters  
 NAME YXL-8-215-H-141202  
 EXPNO 10  
 PROCNO 1

F2 - Acquisition Parameters  
 Date\_ 20141202  
 Time 12.17  
 INSTRUM spect  
 PROBHD 5 mm PABBO BB/  
 PULPROG zg30  
 TD 65536  
 SOLVENT DMSO  
 NS 16  
 DS 2  
 SWH 8012.820 Hz  
 FIDRES 0.122266 Hz  
 AQ 4.0894465 sec  
 RG 112.9  
 DW 62.400 usec  
 DE 6.50 usec  
 TE 297.0 K  
 D1 1.00000000 sec  
 TD0 1

==== CHANNEL f1 =====  
 SF01 400.1324710 MHz  
 NUC1 1H  
 P1 8.78 usec  
 PLW1 19.00000000 W

F2 - Processing parameters  
 SI 65536  
 SF 400.1300024 MHz  
 WDW EM  
 SSB 0  
 LB 0.30 Hz  
 GB 0  
 PC 1.00

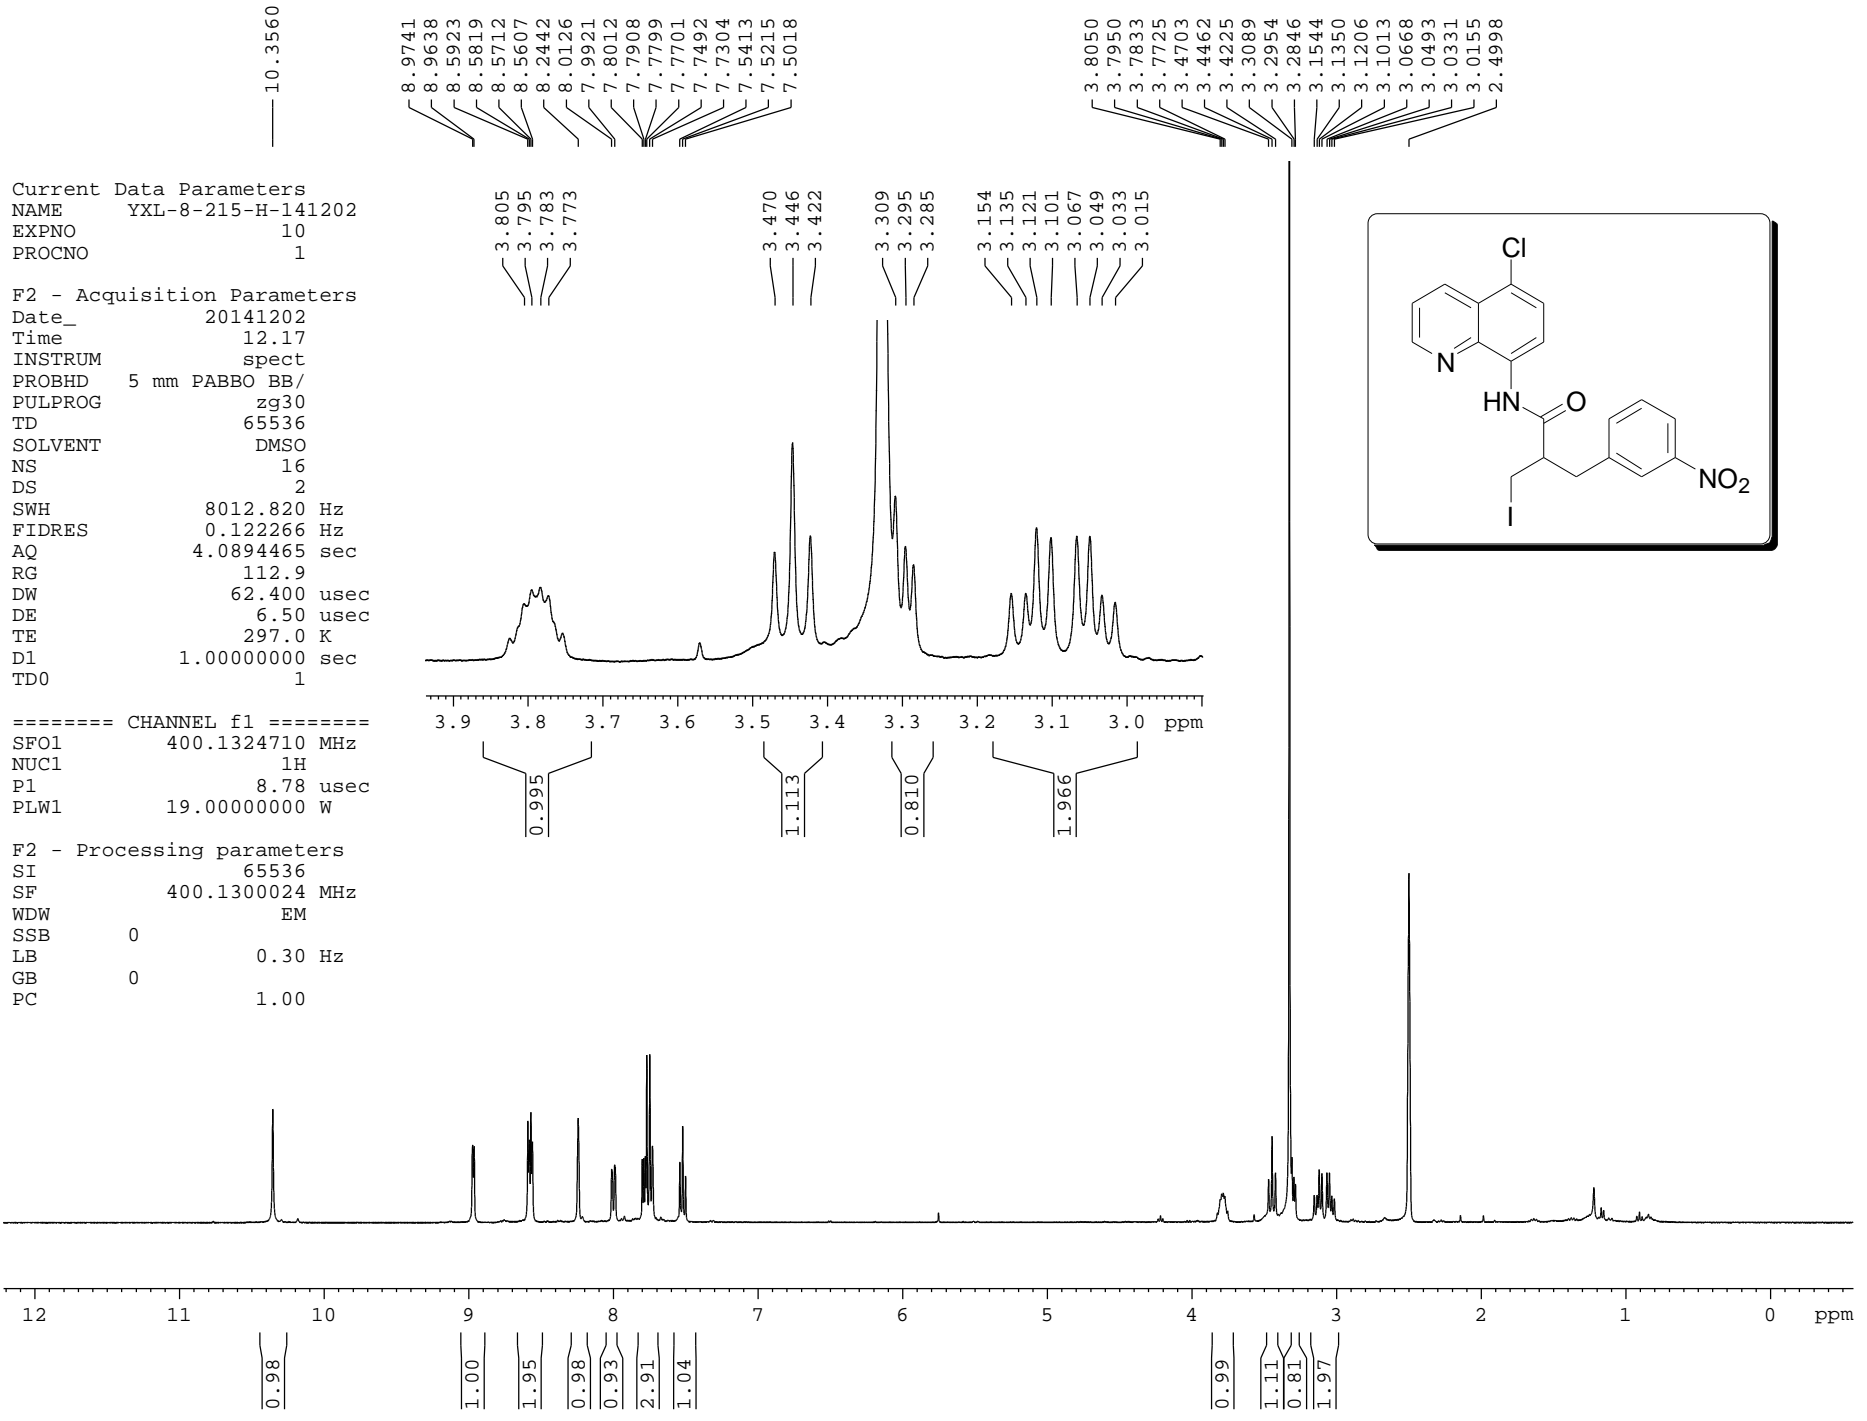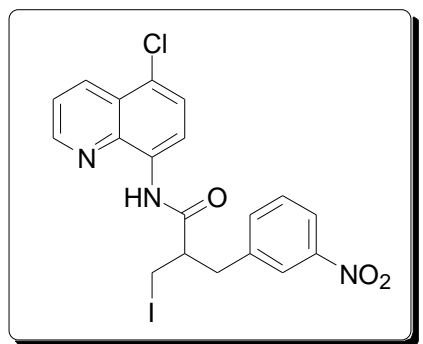

Current Data Parameters  
NAME YXL-8-215-C-141202  
EXPNO 10  
PROCNO 1

F2 - Acquisition Parameters  
Date\_ 20141203  
Time 4.50  
INSTRUM spect  
PROBHD 5 mm PABBO BB/  
PULPROG zgpg30  
TD 65536  
SOLVENT DMSO  
NS 1000  
DS 4  
SWH 24038.461 Hz  
FIDRES 0.366798 Hz  
AQ 1.3631488 sec  
RG 202.1  
DW 20.800 usec  
DE 6.50 usec  
TE 297.0 K  
D1 2.00000000 sec  
D11 0.03000000 sec  
TD0 1

===== CHANNEL f1 =====  
SFO1 100.6228293 MHz  
NUC1 13C  
P1 9.85 usec  
PLW1 65.00000000 W

===== CHANNEL f2 =====  
SFO2 400.1316005 MHz  
NUC2 1H  
CPDPRG[2] waltz16  
PCPD2 90.00 usec  
PLW2 19.00000000 W  
PLW12 0.18082000 W  
PLW13 0.14647000 W

F2 - Processing parameters  
SI 32768  
SF 100.6128156 MHz  
WDW EM  
SSB 0  
LB 1.00 Hz  
GB 0  
PC 1.40

171.39

149.62  
147.79  
140.58  
138.99  
136.05  
133.82  
132.83  
129.70  
127.00  
125.32  
123.77  
123.56  
123.30  
121.49  
117.55

50.05

38.55

6.33

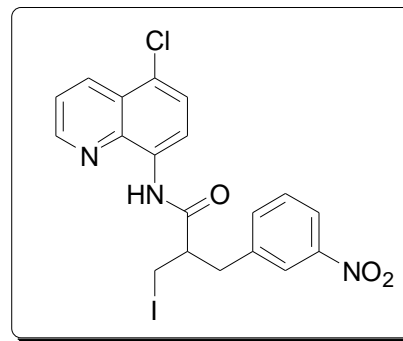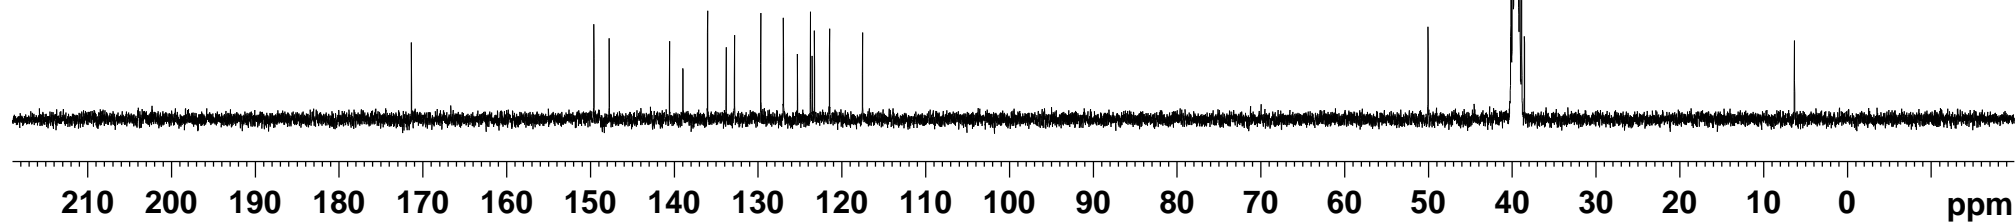

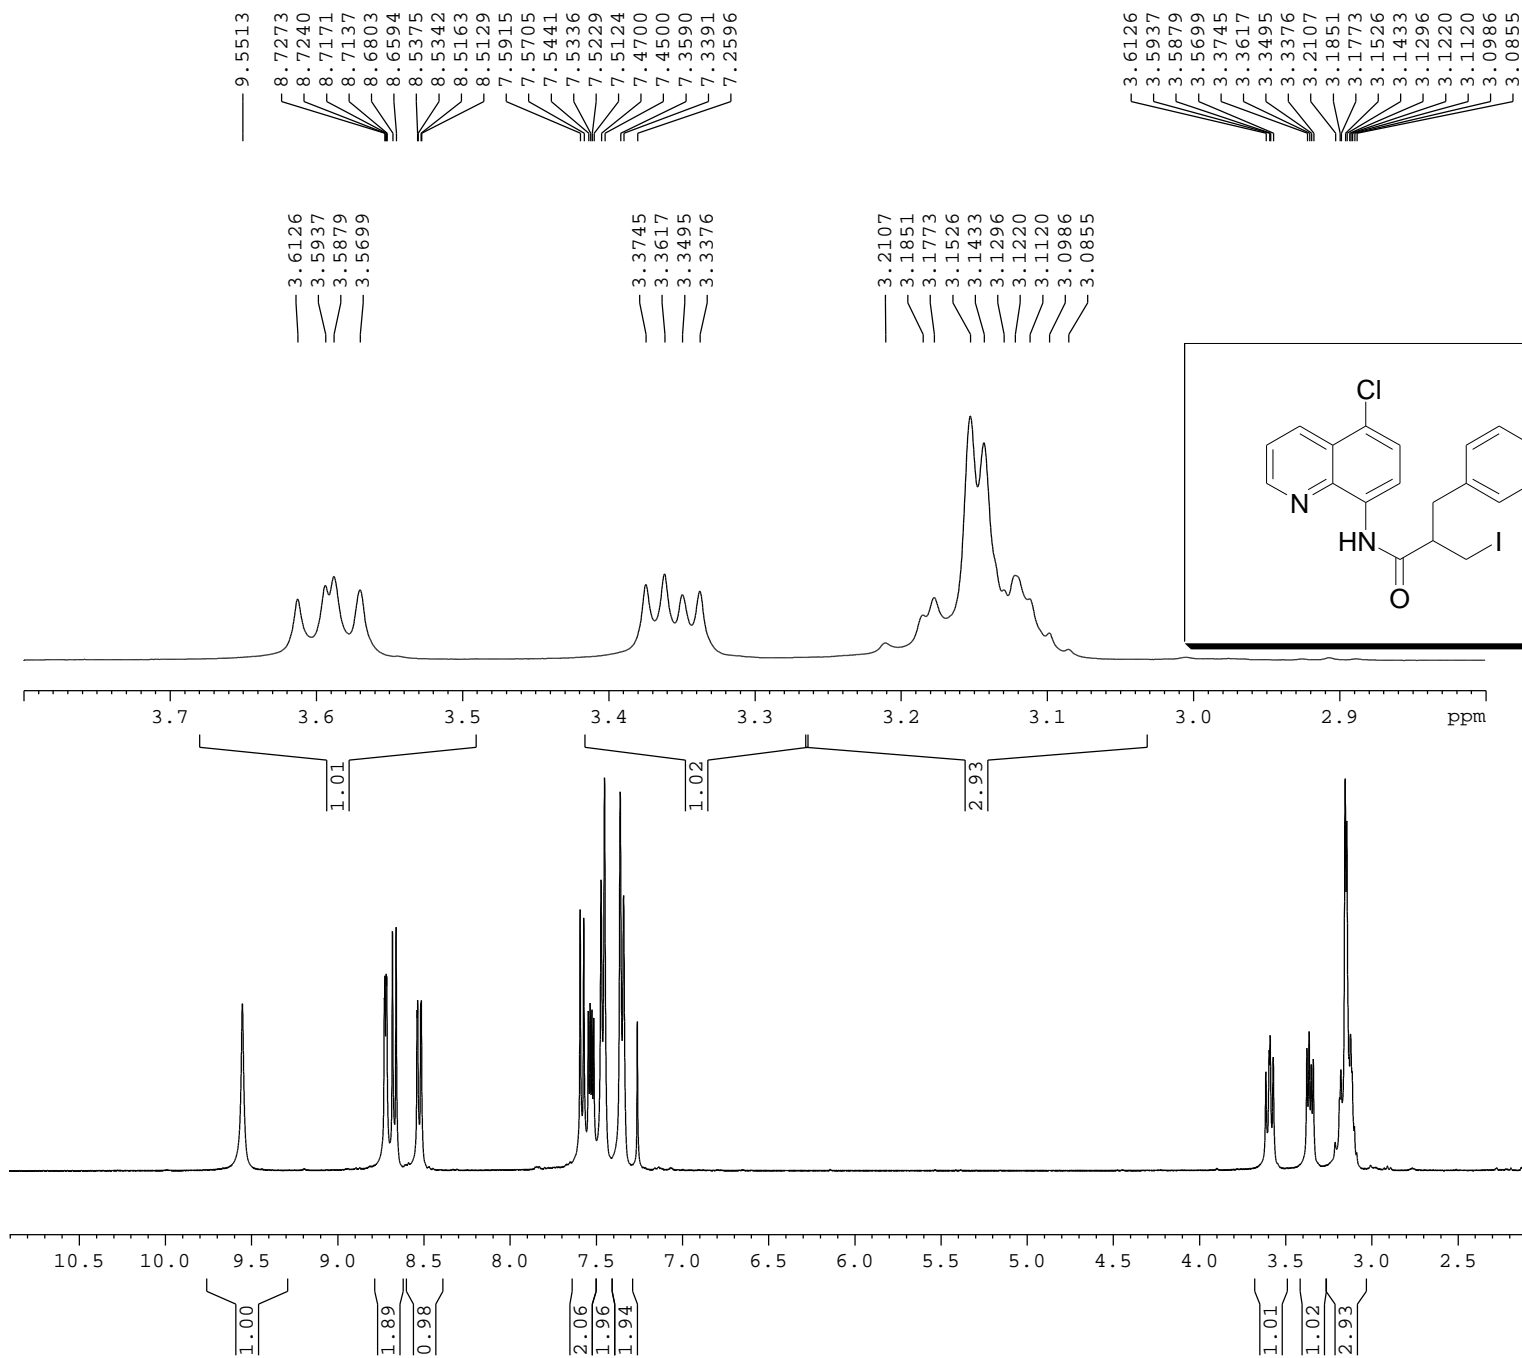

Current Data Parameters  
 NAME syh-7-233-2  
 EXPNO 10  
 PROCNO 1

F2 - Acquisition Parameters  
 Date\_ 20150427  
 Time 11.19  
 INSTRUM spect  
 PROBHD 5 mm PABBO BB-  
 PULPROG zg30  
 TD 65536  
 SOLVENT CDC13  
 NS 16



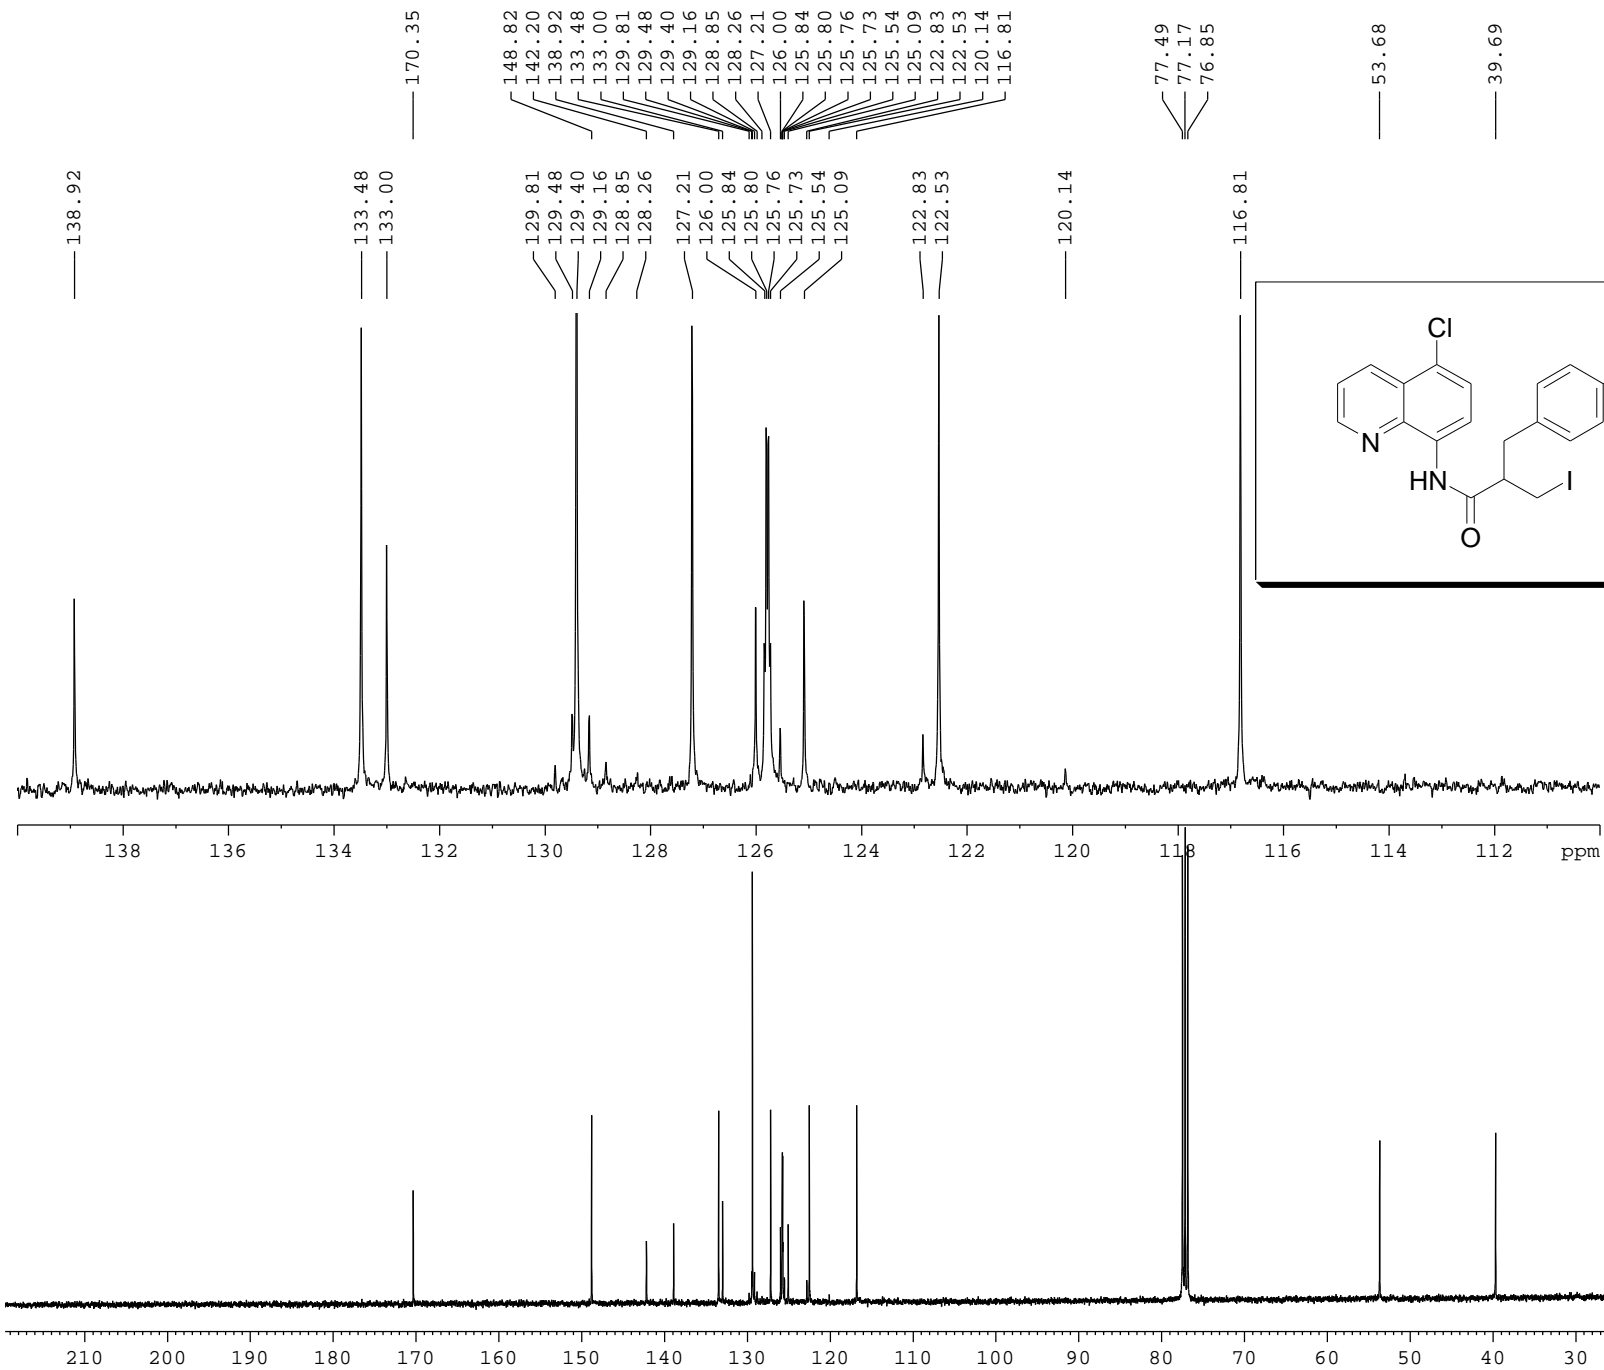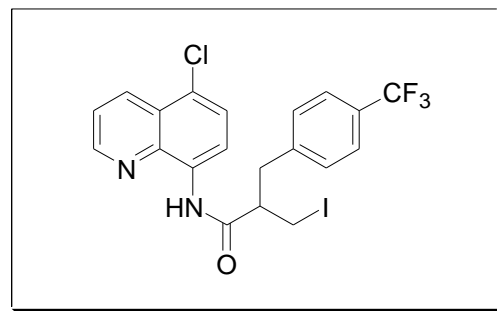

```

Current Data Parameters
NAME      ayh-7-233-2-c
EXPNO    20
PROCNO    1

F2 - Acquisition Parameters
Date_     20150428
Time      2.24
INSTRUM   spect
PROBHD    5 mm PABBO BB-
PULPROG   zgpg30
TD         65536
SOLVENT   CDCl3
NS         1024
DS         4
SWH        24038.461 Hz
FIRRES     0.366798 Hz
AQ         1.3631988 sec
RG         209.25
DW         20.800 usec
DE         6.50 usec
TE         300.2 K
D1         2.0000000 sec
d11        0.0300000 sec
TDO        1

===== CHANNEL f1 =====
NUC1       13C
P1         10.59 usec
PLM1       50.00299835 W
SFO1       100.6228293 MHz

===== CHANNEL f2 =====
CPDPRG2    waltz16
NUC2        1H
PCPD2       90.00 usec
PLW2        13.00199986 W
PLM2        0.35303000 W
PLM3        0.28595001 W
SFO2        400.1316005 MHz

F2 - Processing parameters
SI          32768
SF          100.6127545 MHz
WDW         EM
SSB         0
LB          1.00 Hz
GB          0
PC          1.40
  
```

Current Data Parameters  
NAME YXL-9-231-H-20150330  
EXPNO 10  
PROCNO 1

9.9521  
8.7742  
8.7665  
8.6593  
8.6384  
8.5503  
8.5294  
8.1316  
8.1091  
8.0896  
7.6359  
7.6135  
7.5800  
7.5696  
7.5589  
7.5476  
7.5408  
7.5198  
7.2601

3.5661  
3.5430  
3.5200  
3.3579  
3.3437  
3.3332  
3.3189  
3.1022  
3.0915  
3.0810  
2.6016  
2.5849  
2.5744  
2.5568  
2.5366  
2.3118  
2.2965  
2.2779  
2.2665  
2.2486  
2.2276  
2.2110  
2.1881  
2.1722  
2.1538

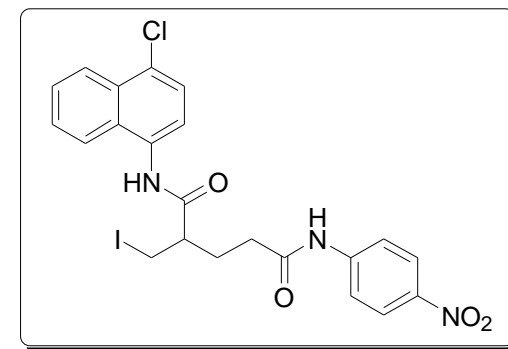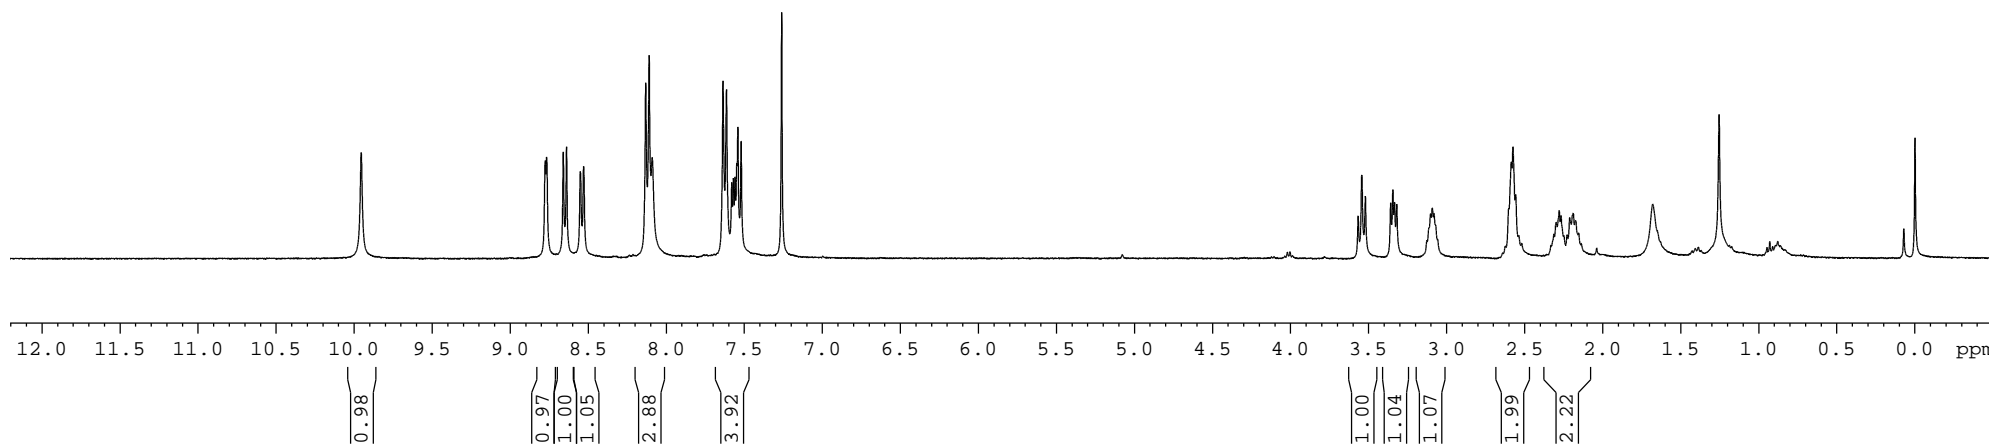

Current Data Parameters  
NAME YXL-9-231-C-150330  
EXPNO 10  
PROCNO 1

F2 - Acquisition Parameters  
Date\_ 20150331  
Time 1.01  
INSTRUM spect  
PROBHD 5 mm PABBO BB/  
PULPROG zgpg30  
TD 65536  
SOLVENT CDCl3  
NS 1024  
DS 4  
SWH 24038.461 Hz  
FIDRES 0.366798 Hz  
AQ 1.3631488 sec  
RG 202.1  
DW 20.800 usec  
DE 6.50 usec  
TE 297.3 K  
D1 2.0000000 sec  
D11 0.03000000 sec  
TD0 1

=====  
SFO1 100.6228293 MHz  
NUC1 13C  
P1 9.85 usec  
PLW1 65.00000000 W

=====  
SFO2 400.1316005 MHz  
NUC2 1H  
CPDPRG[2] waltz16  
PCPD2 90.00 usec  
PLW2 19.00000000 W  
PLW12 0.18082000 W  
PLW13 0.14647000 W

F2 - Processing parameters  
SI 32768  
SF 100.6127557 MHz  
WDW EM  
SSB 0  
LB 1.00 Hz  
GB 0  
PC 1.40

171.31  
170.61

149.12  
143.76  
143.54  
139.02  
133.69  
132.87  
127.08  
126.10  
125.56  
125.11  
122.73  
119.08  
117.01

77.48  
77.16  
76.84

50.63

34.86

29.33

4.47

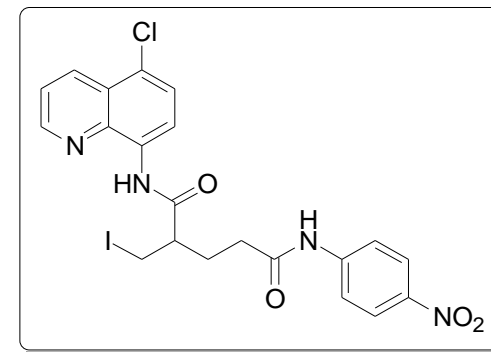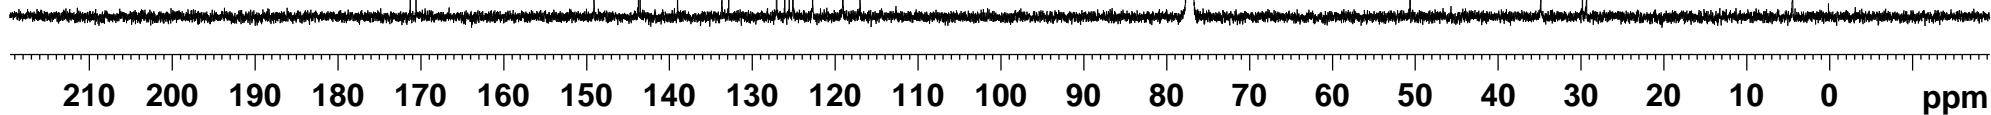

9.9320  
 8.8537  
 8.8498  
 8.8431  
 8.8392  
 8.7317  
 8.7107  
 8.5546  
 8.5506  
 8.5333  
 8.5293  
 7.8214  
 7.8004  
 7.5980  
 7.5897  
 7.5874  
 7.5766  
 7.5661  
 7.2599

3.7806  
 3.7584  
 3.7557  
 3.7336  
 3.5647  
 3.5518  
 3.5396  
 3.5268  
 2.8803  
 2.8720  
 2.8587  
 2.8454  
 2.8370  
 1.9345  
 1.9159  
 1.9136  
 1.9001  
 1.8949  
 1.8814  
 1.8792  
 1.8750  
 1.8604  
 1.8276  
 1.8136  
 1.8090  
 1.7948  
 1.7793  
 1.7750  
 1.7608  
 1.0729  
 1.0543  
 1.0356

Current Data Parameters  
 NAME YXL-9-287-1-H-150410  
 EXPNO 10  
 PROCNO 1

F2 - Acquisition Parameters  
 Date\_ 20150410  
 Time 13.08  
 INSTRUM spect  
 PROBHD 5 mm PABBO BB/  
 PULPROG zg30  
 TD 65536  
 SOLVENT CDC13

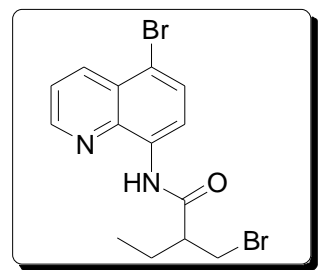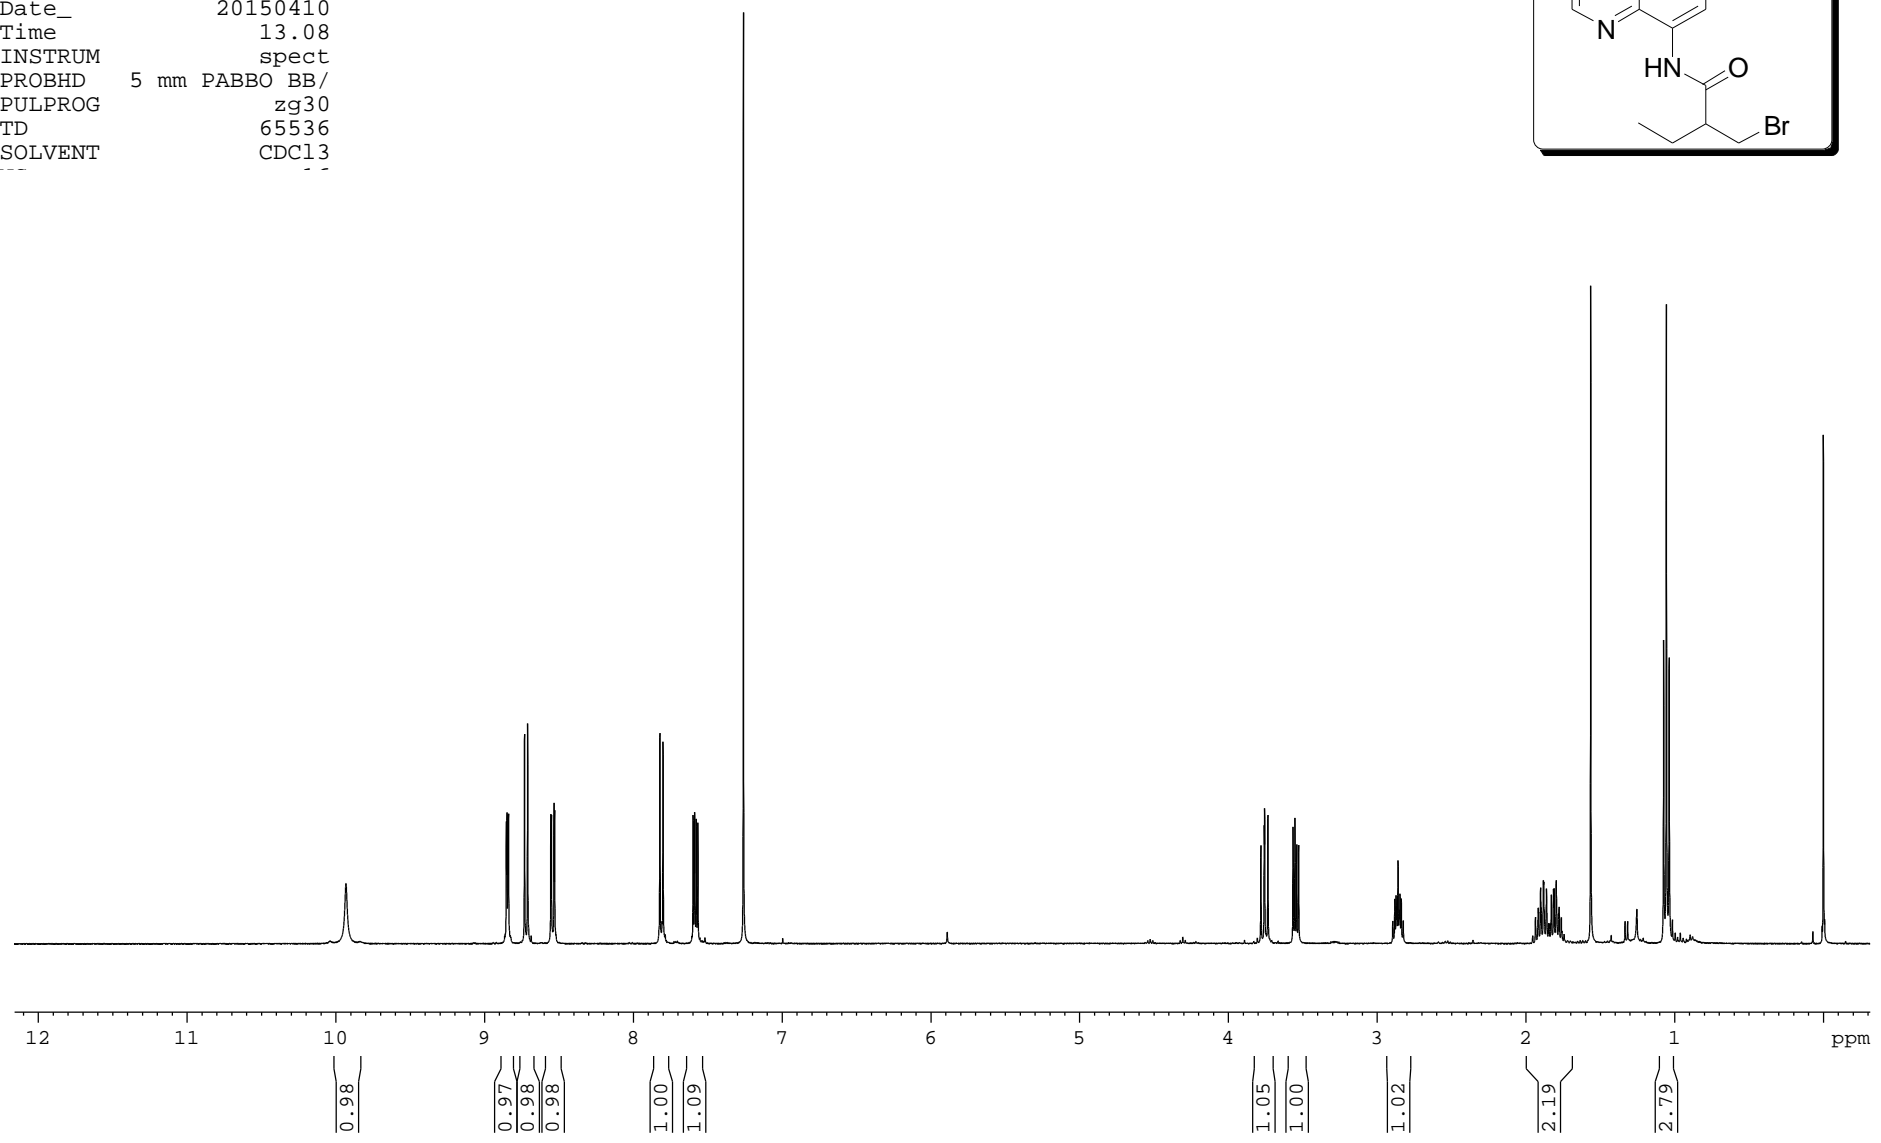

— 171.62

— 148.95

— 139.27

— 136.17

— 134.11

— 131.03

— 127.37

— 122.88

— 117.39

— 114.78

— 53.29

— 32.93

— 25.64

— 11.87

Current Data Parameters  
NAME 4N1-H  
EXPNO 10  
PROCNO 1

F2 - Acquisition Parameters  
Date\_ 20150412  
Time 20.37  
INSTRUM spect  
PROBHD 5 mm PABBO BB/  
PULPROG zgpg30  
TD 65536  
SOLVENT CDC13  
NS 1024  
DS 4  
SWH 24038.461 Hz  
FIDRES 0.366798 Hz  
AQ 1.3631988 sec  
RG 202.1  
DW 20.800 usec  
DE 6.50 usec  
TE 297.0 K  
D1 2.00000000 sec  
d11 0.03000000 sec  
DELTA 1.89999998 sec  
TD0 1  
NUC1 13C  
P1 9.85 usec  
PLW1 65.00000000 W  
SFO1 100.6228293 MHz  
CPDPRG2  
NUC2 1H  
PLW2 19.00000000 W  
PLW12 0.18082000 W  
PLW13 0.14647000 W  
SFO2 400.1316005 MHz

F2 - Processing parameters  
SI 32768  
SF 100.6127548 MHz  
WDW EM  
SSB 0  
LB 1.00 Hz  
GB 0  
PC 1.40

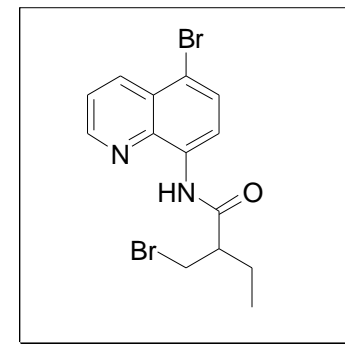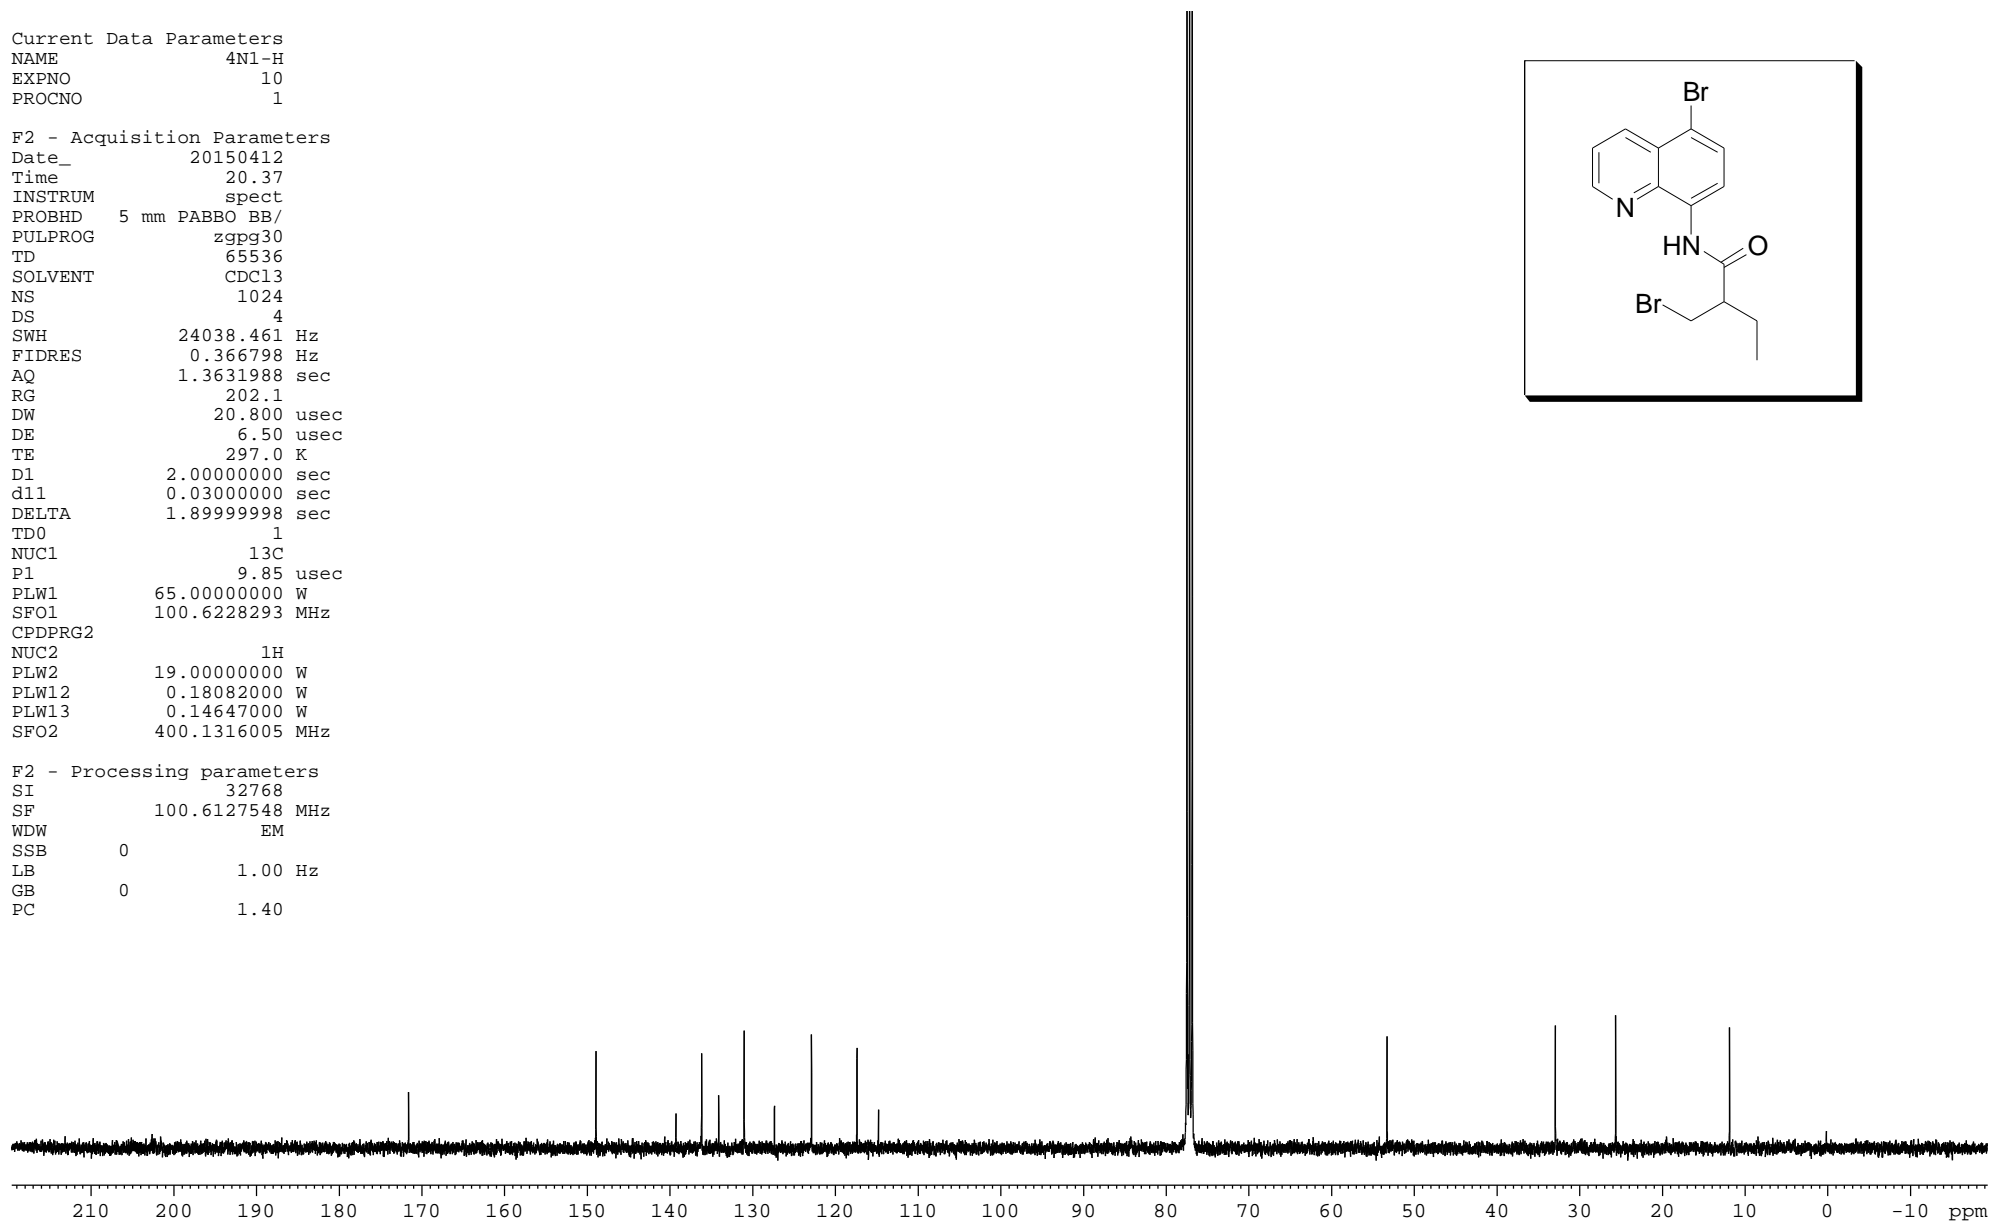

Current Data Parameters  
 NAME YXL-9-287-2-H-20150411  
 EXPNO 10  
 PROCNO 1

F2 - Acquisition Parameters  
 Date\_ 20150411  
 Time 11.11  
 INSTRUM spect  
 PROBHD 5 mm PABBO BB-  
 PULPROG zg30  
 TD 65536  
 SOLVENT CDCl3  
 NS 16  
 DS 2  
 SWH 8223.685 Hz  
 FIDRES 0.125483 Hz  
 AQ 3.9846387 sec  
 RG 209.25  
 DW 60.800 usec  
 DE 6.50 usec  
 TE 299.8 K  
 D1 1.00000000 sec  
 TD0 1

==== CHANNEL f1 =====  
 NUC1 1H  
 P1 14.83 usec  
 PLW1 13.00199986 W  
 SFO1 400.1324710 MHz

F2 - Processing parameters  
 SI 65536  
 SF 400.1300096 MHz  
 WDW EM  
 SSB 0  
 LB 0.30 Hz  
 GB 0  
 PC 1.00

8.876  
8.872  
8.865  
8.493  
8.489  
8.472  
8.468  
8.380  
8.061  
7.570  
7.559  
7.549  
7.538  
7.260

3.801  
3.780  
3.776  
3.756  
3.563  
3.549  
3.538  
3.524  
2.913  
2.907  
2.893  
2.879  
2.873  
1.969  
1.950  
1.934  
1.916  
1.896  
1.881  
1.867  
1.863  
1.849  
1.830  
1.815  
1.179  
1.161  
1.142

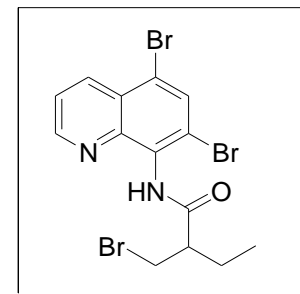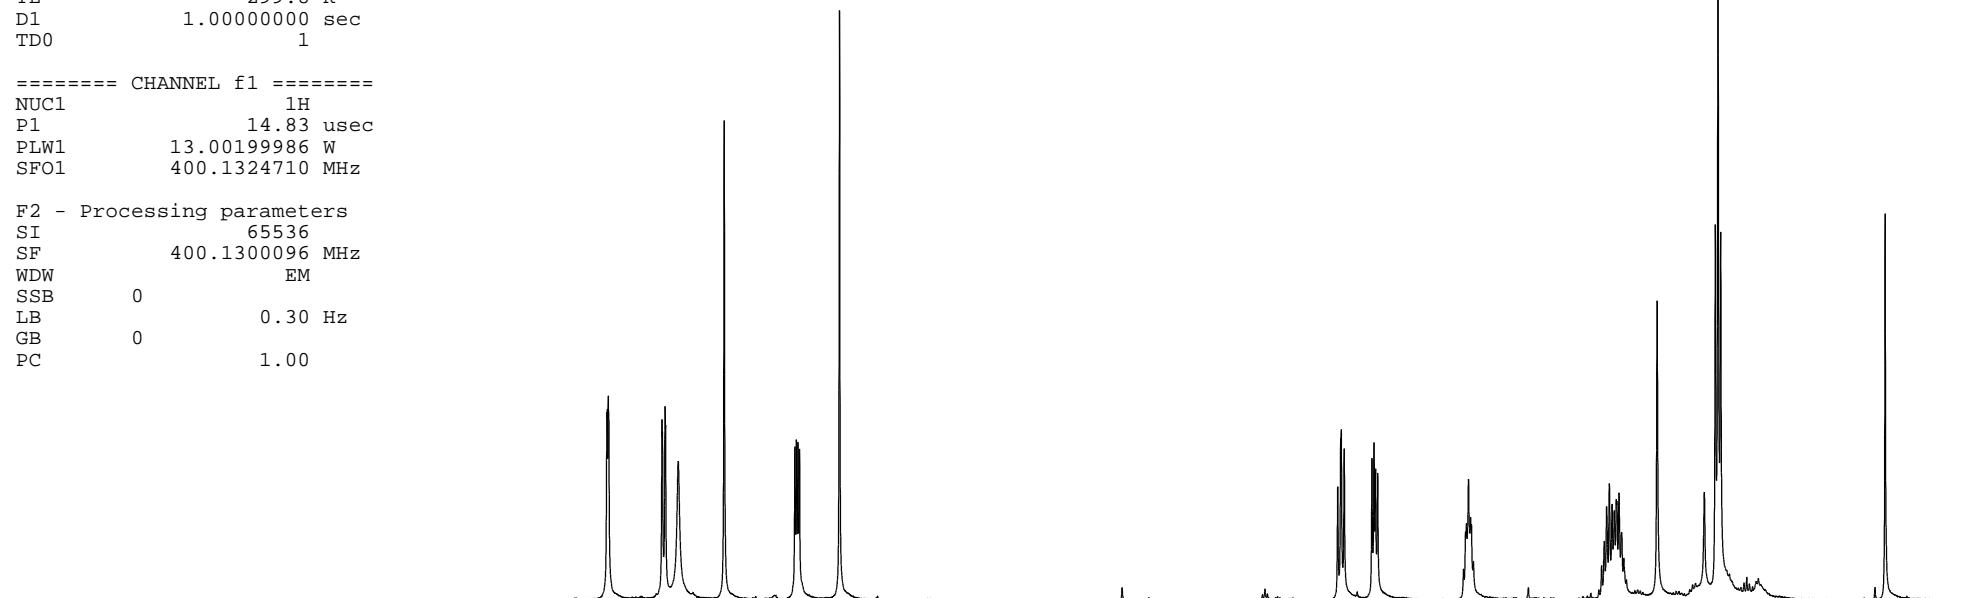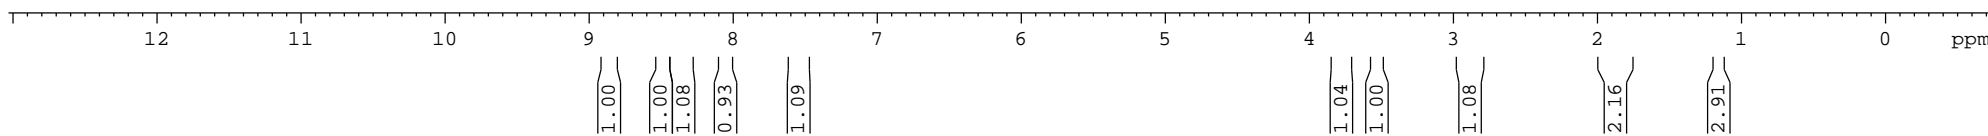

— 171.08  
 — 150.88  
 — 143.97  
 136.00  
 134.37  
 133.59  
 — 126.97  
 — 122.94  
 — 120.42  
 — 119.39  
 — 52.35  
 — 32.87  
 — 25.56  
 — 11.84

Current Data Parameters  
 NAME 4N2-H  
 EXPNO 11  
 PROCNO 1

F2 - Acquisition Parameters  
 Date\_ 20150423  
 Time 0.40  
 INSTRUM spect  
 PROBHD 5 mm PABBO BB/  
 PULPROG zgpg30  
 TD 65536  
 SOLVENT CDC13  
 NS 1700  
 DS 4  
 SWH 24038.461 Hz  
 FIDRES 0.366798 Hz  
 AQ 1.3631988 sec  
 RG 202.1  
 DW 20.800 usec  
 DE 6.50 usec  
 TE 297.5 K  
 D1 2.00000000 sec  
 d11 0.03000000 sec  
 DELTA 1.89999998 sec  
 TD0 1  
 NUC1 13C  
 P1 9.85 usec  
 PLW1 65.00000000 W  
 SFO1 100.6228293 MHz  
 CPDPRG2  
 NUC2 1H  
 PLW2 19.00000000 W  
 PLW12 0.18082000 W  
 PLW13 0.14647000 W  
 SFO2 400.1316005 MHz

F2 - Processing parameters  
 SI 32768  
 SF 100.6127551 MHz  
 WDW EM  
 SSB 0  
 LB 1.00 Hz  
 GB 0  
 PC 1.40

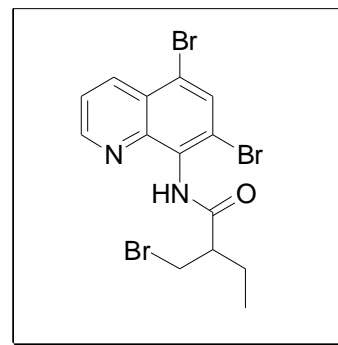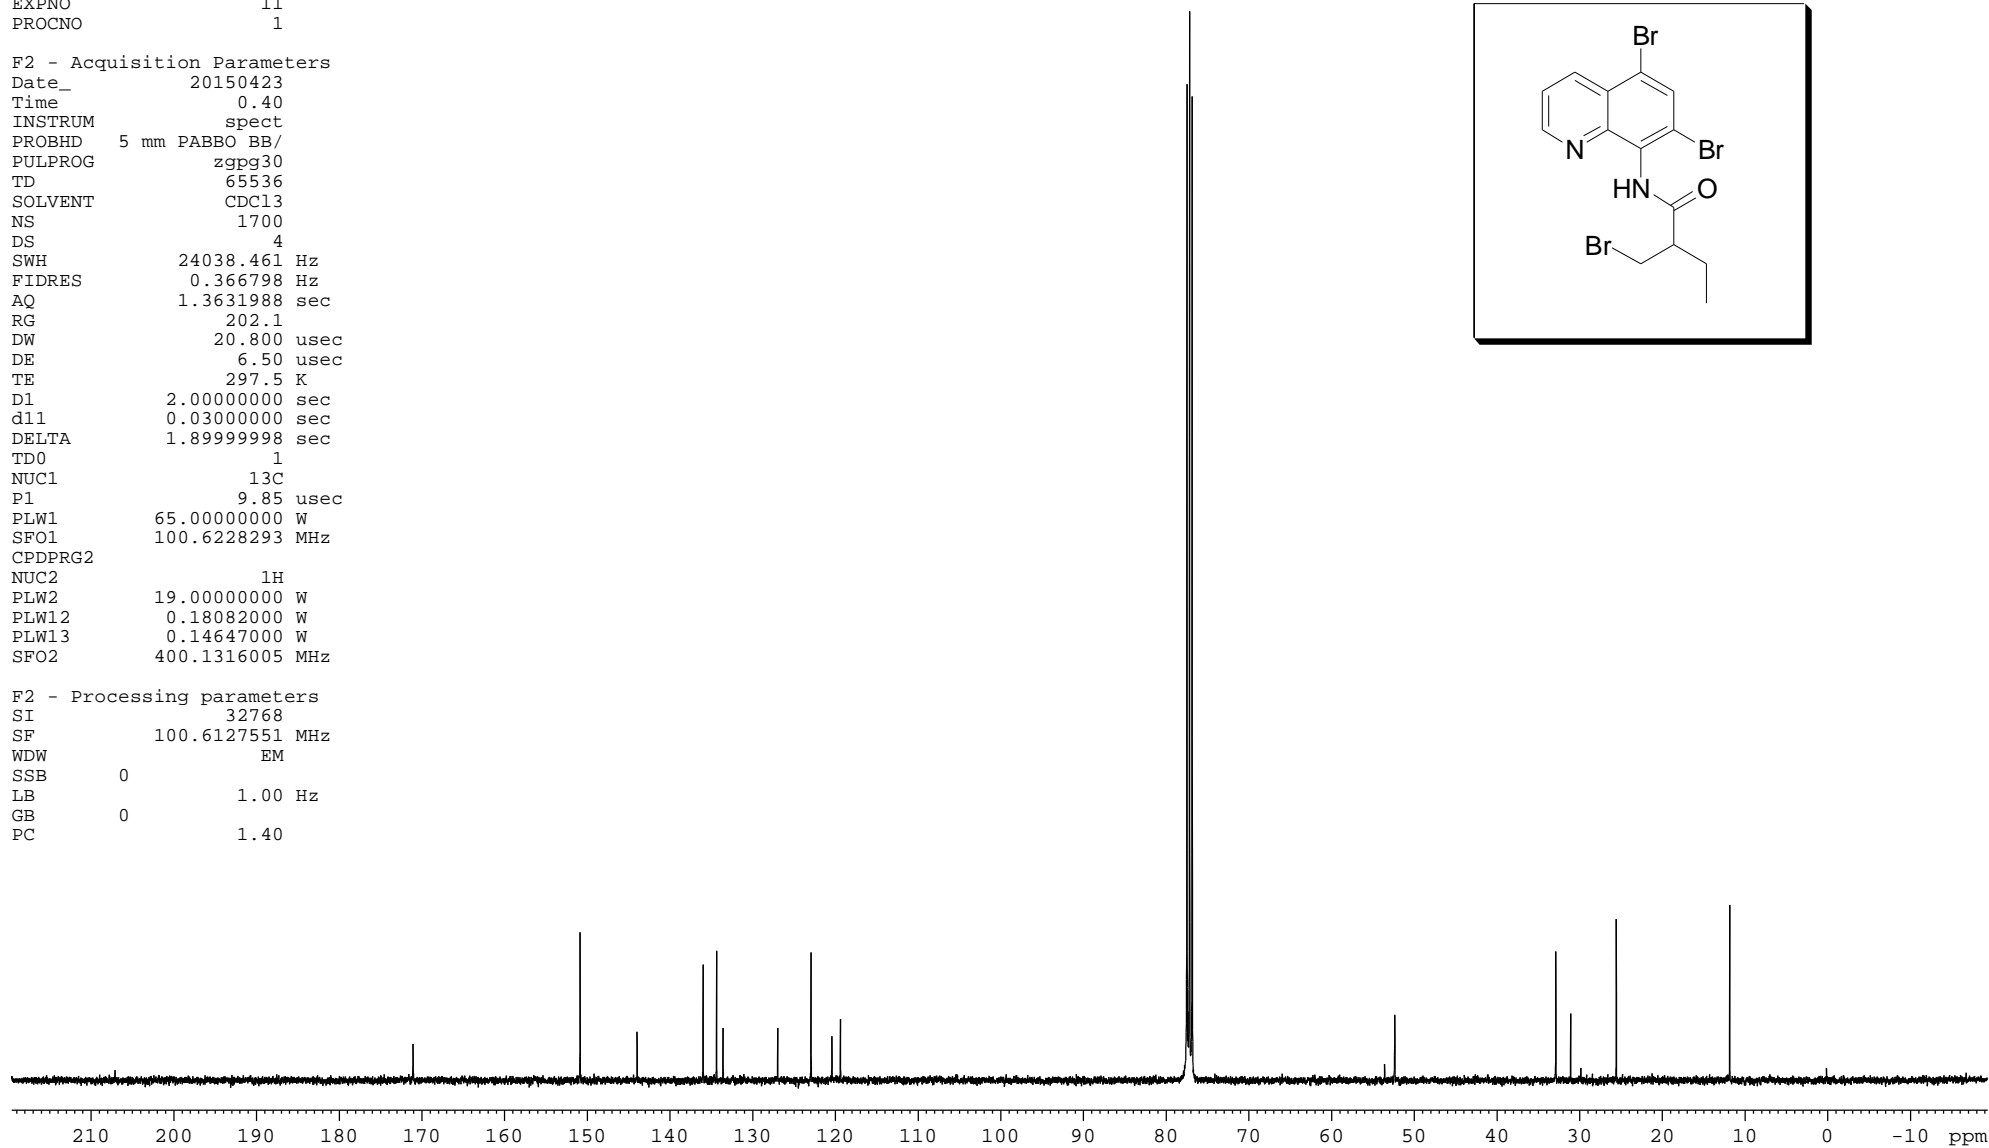

Current Data Parameters  
 NAME YXL-9-294-1--H-20150418  
 EXPNO 20  
 PROCNO 1

F2 - Acquisition Parameters  
 Date\_ 20150418  
 Time 19.55  
 INSTRUM spect  
 PROBHD 5 mm PABBO BB-  
 PULPROG zg30  
 TD 65536  
 SOLVENT CDCl3  
 NS 16  
 DS 2  
 SWH 8223.685 Hz  
 FIDRES 0.125483 Hz  
 AQ 3.9846387 sec  
 RG 130.81  
 DW 60.800 usec  
 DE 6.50 usec  
 TE 301.3 K  
 D1 1.00000000 sec  
 TD0 1

==== CHANNEL f1 =====  
 NUC1 1H  
 P1 14.83 usec  
 PLW1 13.00199986 W  
 SFO1 400.1324710 MHz

F2 - Processing parameters  
 SI 65536  
 SF 400.1300092 MHz  
 WDW EM  
 SSB 0  
 LB 0.30 Hz  
 GB 0  
 PC 1.00

9.6570  
 8.6780  
 8.6571  
 8.5416  
 8.5379  
 8.5311  
 8.5274  
 8.5063  
 8.5025  
 8.4850  
 8.4812  
 7.9221  
 7.7315  
 7.6008  
 7.5798  
 7.4789  
 7.4683  
 7.4576  
 7.4470  
 7.2600

5.1216  
 5.1081  
 5.0982  
 5.0847  
 4.2379  
 4.2244  
 4.2118  
 4.1983  
 4.0820  
 4.0582  
 4.0324

2.4332  
 2.4150  
 1.9683  
 1.9515  
 1.9345  
 1.9176  
 1.9007  
 1.8838  
 1.8667  
 0.9720  
 0.9676  
 0.9556  
 0.9512

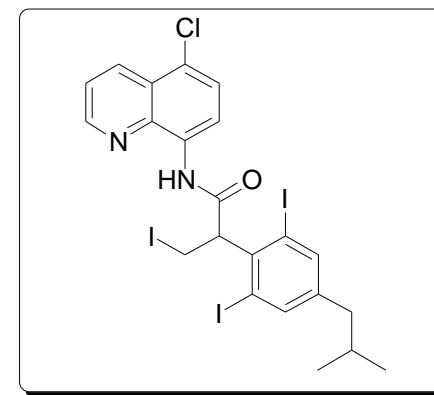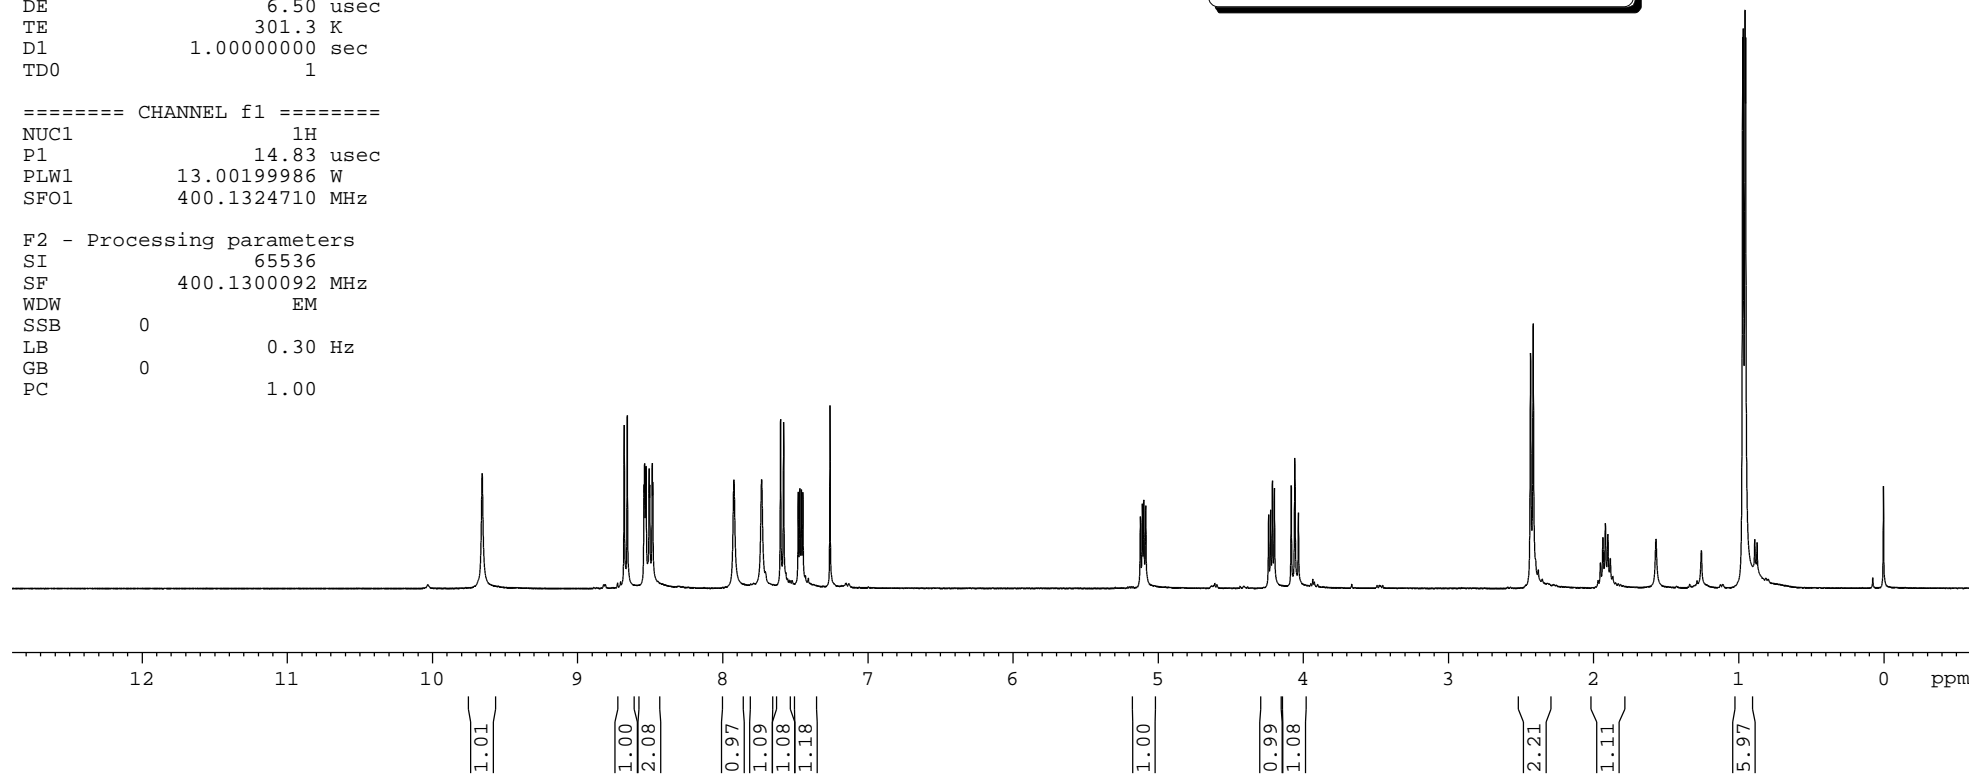



Current Data Parameters  
 NAME YXL-9-294-1--c-20150418  
 EXPNO 22  
 PROCNO 1

F2 - Acquisition Parameters

Date\_ 20150419  
 Time 11.16  
 INSTRUM spect  
 PROBHD 5 mm PABBO BB-  
 PULPROG zgpg30  
 TD 65536  
 SOLVENT CDCl3  
 NS 1000  
 DS 4  
 SWH 24038.461 Hz  
 FIDRES 0.366798 Hz  
 AQ 1.3631988 sec  
 RG 209.25  
 DW 20.800 usec  
 DE 6.50 usec  
 TE 302.2 K  
 D1 2.00000000 sec  
 D11 0.03000000 sec  
 TD0 1

==== CHANNEL f1 =====  
 NUC1 13C  
 P1 10.59 usec  
 PLW1 50.00299835 W  
 SFO1 100.6228293 MHz

==== CHANNEL f2 =====  
 CPDPRG2 waltz16  
 NUC2 1H  
 PCPD2 90.00 usec  
 PLW2 13.00199986 W  
 PLW12 0.35303000 W  
 PLW13 0.28595001 W  
 SFO2 400.1316005 MHz

F2 - Processing parameters  
 SI 32768  
 SF 100.6127547 MHz  
 WDW EM  
 SSB 0  
 LB 1.00 Hz  
 GB 0  
 PC 1.40

167.66  
 148.76  
 145.69  
 143.44  
 141.39  
 139.17  
 138.82  
 133.70  
 133.33  
 127.29  
 126.02  
 124.70  
 122.38  
 116.36  
 106.32  
 94.87  
 77.48  
 77.16  
 76.84  
 62.62  
 43.68  
 30.15  
 22.38  
 22.33  
 2.30

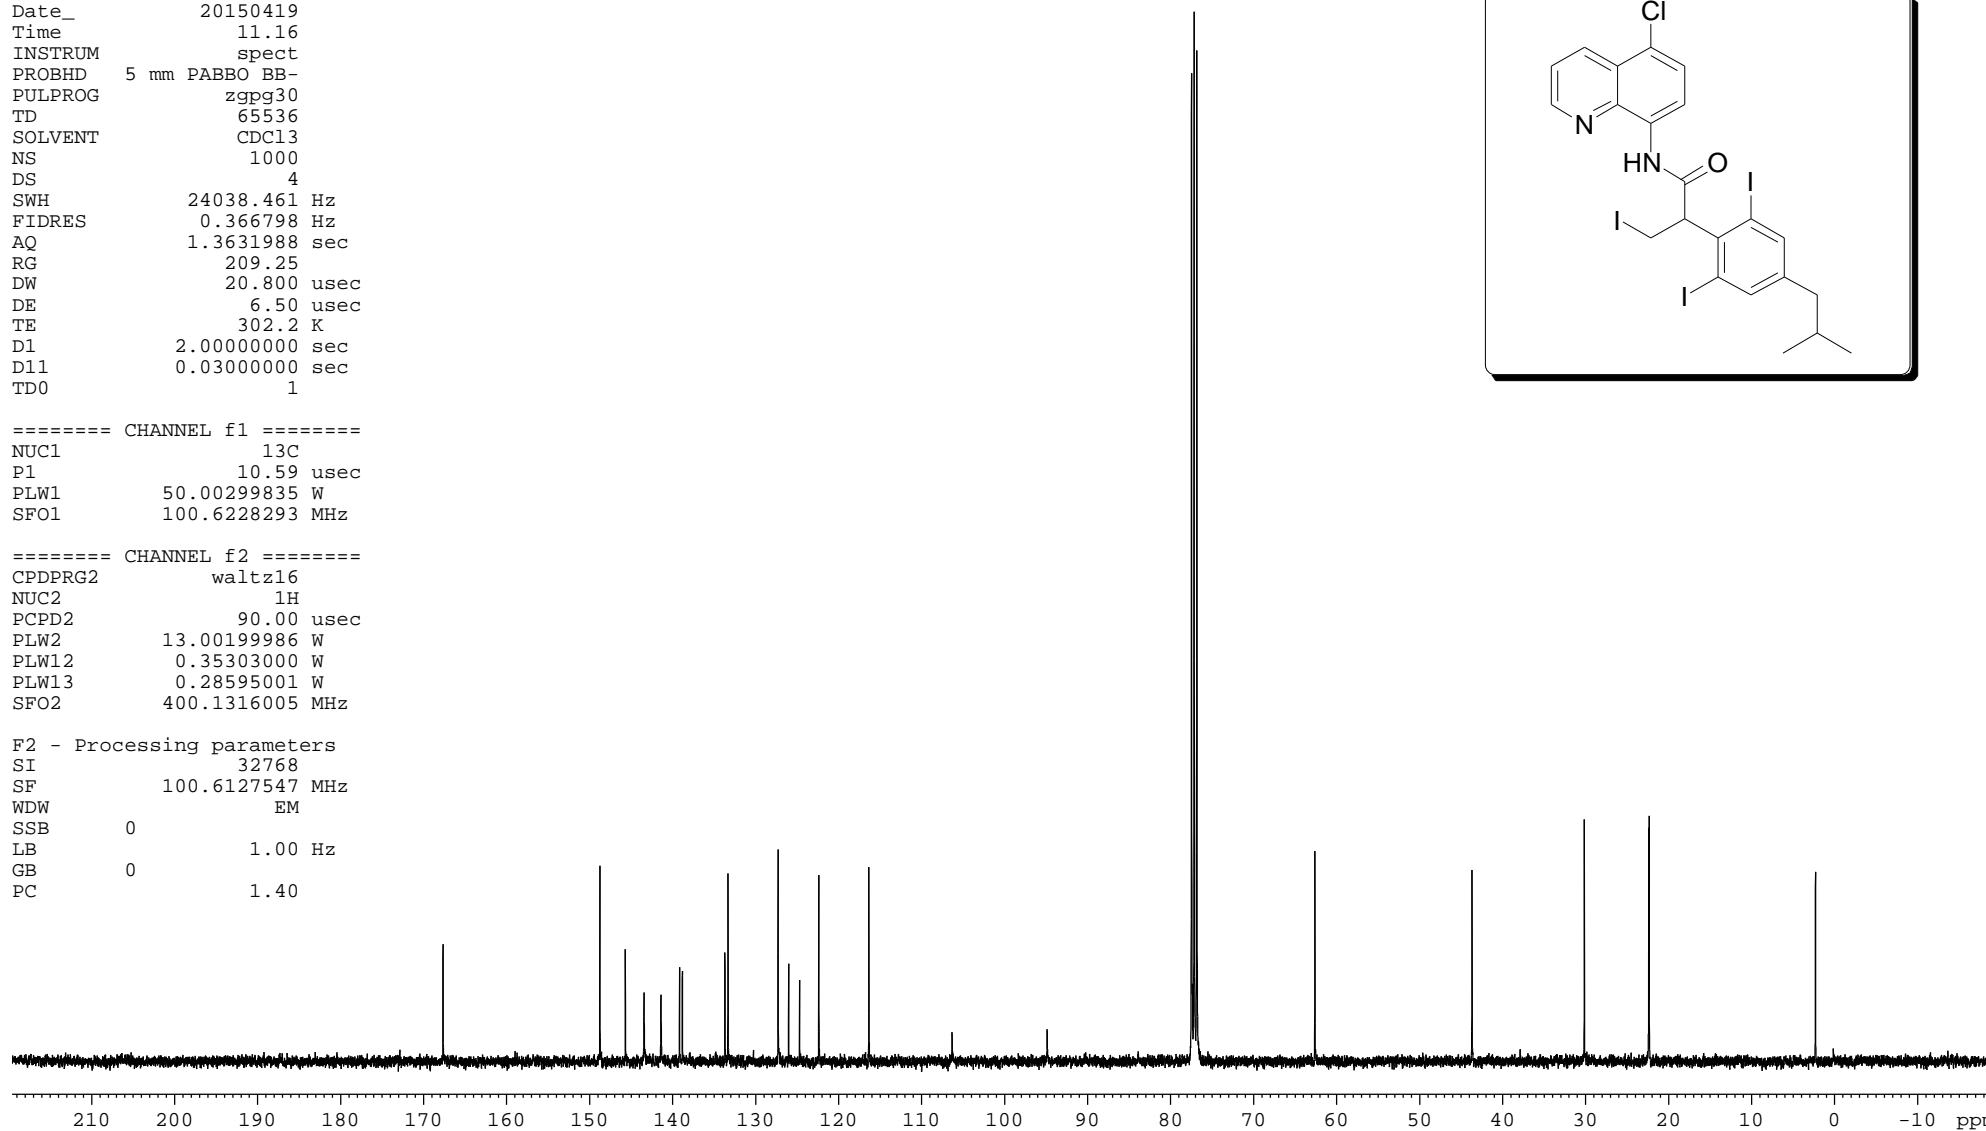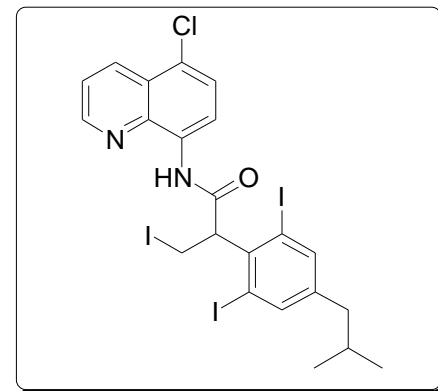

Current Data Parameters  
NAME YXL-9-294-1--HMBC-20150418  
EXPNO 24  
PROCNO 1

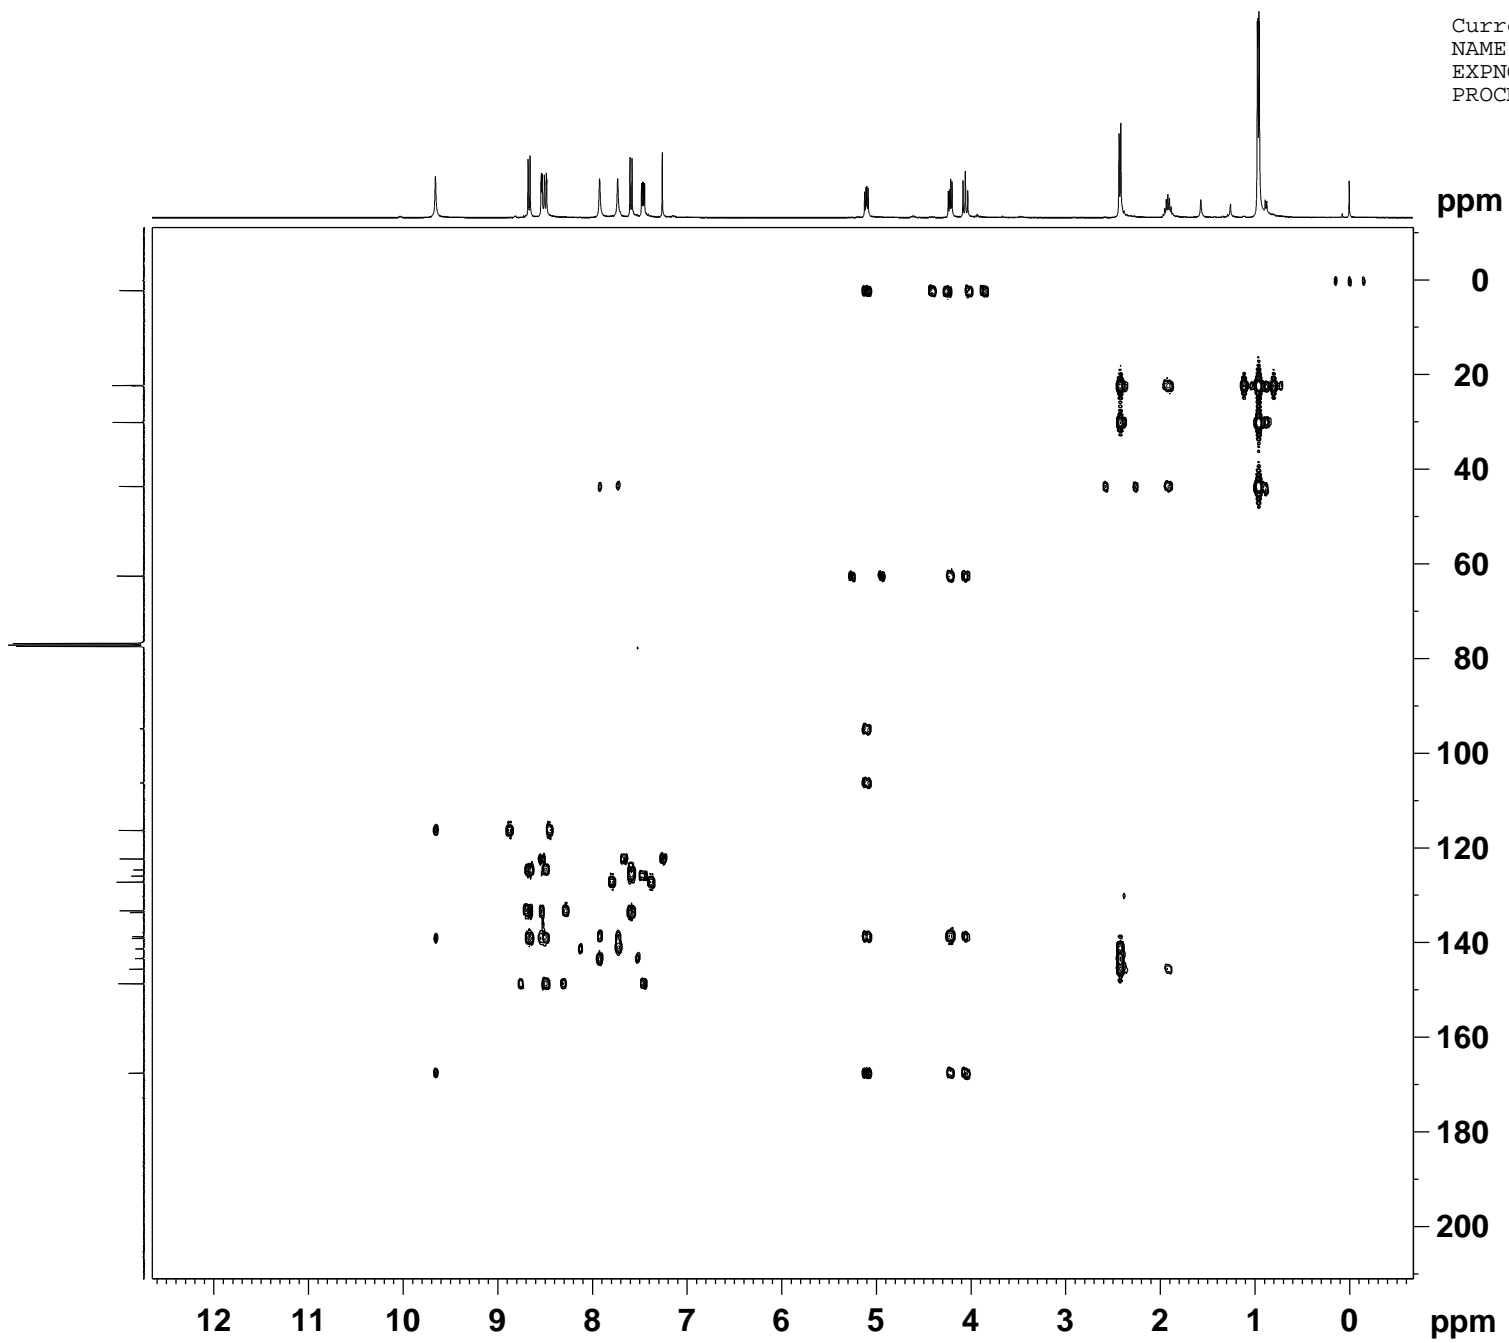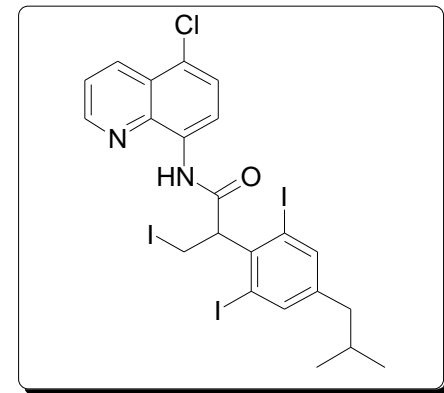

Current Data Parameters  
 NAME YXL-9-139-2-1-H-20150210  
 EXPNO 10  
 PROCNO 1

F2 - Acquisition Parameters

Date\_ 20150210  
 Time 11.54  
 INSTRUM spect  
 PROBHD 5 mm PABBO BB-  
 PULPROG zg30  
 TD 65536  
 SOLVENT CDC13  
 NS 16  
 DS 2  
 SWH 8223.685 Hz  
 FIDRES 0.125483 Hz  
 AQ 3.9846387 sec  
 RG 85  
 DW 60.800 usec  
 DE 6.50 usec  
 TE 294.2 K  
 D1 1.00000000 sec  
 TD0 1

==== CHANNEL f1 =====  
 NUC1 1H  
 P1 14.83 usec  
 PLW1 13.00199986 W  
 SFO1 400.1324710 MHz

F2 - Processing parameters

SI 65536  
 SF 400.1300092 MHz  
 WDW EM  
 SSB 0  
 LB 0.30 Hz  
 GB 0  
 PC 1.00

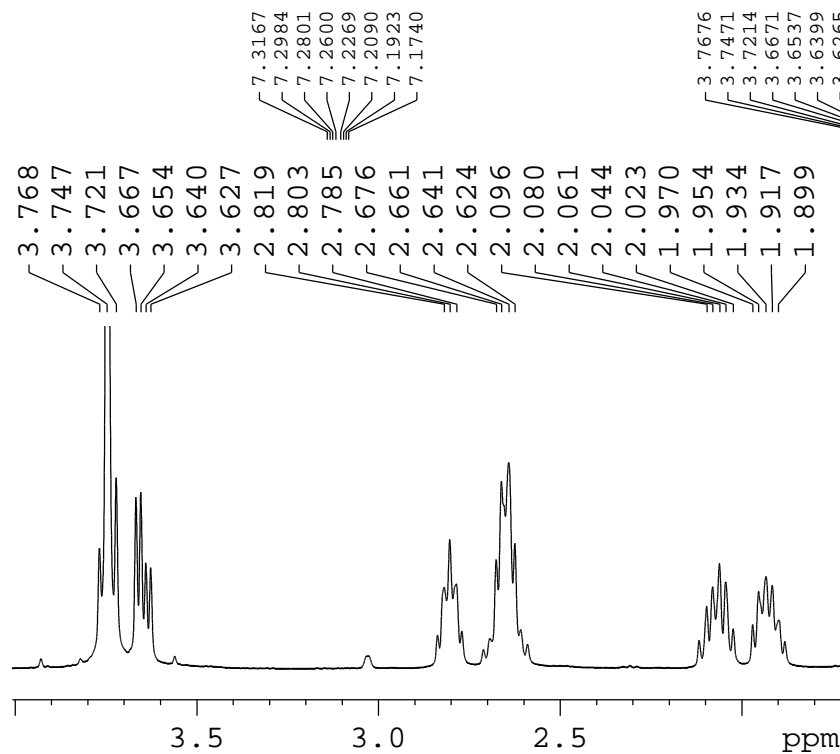

7.3167  
7.2984  
7.2801  
7.2600  
7.2269  
7.2090  
7.1923  
7.1740

3.7676  
3.7471  
3.7214  
3.6671  
3.6537  
3.6399  
3.6265  
2.8370  
2.8189  
2.8033  
2.7849  
2.7701  
2.6931  
2.6755  
2.6610  
2.6408  
2.6242  
2.6078  
2.1170  
2.0962  
2.0798  
2.0611  
2.0438  
2.0233  
1.9704  
1.9539  
1.9338  
1.9166  
1.8993

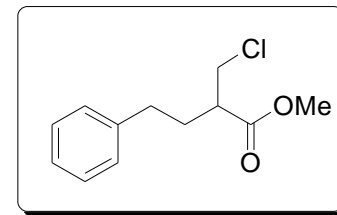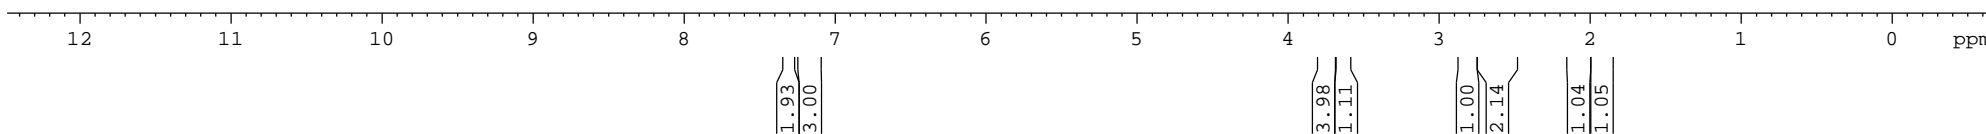

Current Data Parameters  
NAME YXL-9-51-2-H-150115  
EXPNO 10  
PROCNO 1

F2 - Acquisition Parameters

Date\_ 20150115  
Time 15.29  
INSTRUM spect  
PROBHD 5 mm PABBO BB/  
PULPROG zgpg30  
TD 65536  
SOLVENT CDCl3  
NS 200  
DS 4  
SWH 24038.461 Hz  
FIDRES 0.366798 Hz  
AQ 1.3631488 sec  
RG 202.1  
DW 20.800 usec  
DE 6.50 usec  
TE 298.0 K  
D1 2.00000000 sec  
D11 0.03000000 sec  
TD0 1

==== CHANNEL f1 =====  
SFO1 100.6228293 MHz  
NUC1 13C  
P1 9.85 usec  
PLW1 65.00000000 W

==== CHANNEL f2 =====  
SFO2 400.1316005 MHz  
NUC2 1H  
CPDPRG[2] waltz16  
PCPD2 90.00 usec  
PLW2 19.00000000 W  
PLW12 0.18082000 W  
PLW13 0.14647000 W

F2 - Processing parameters

SI 32768  
SF 100.6127575 MHz  
WDW EM  
SSB 0  
LB 1.00 Hz  
GB 0  
PC 1.40

173.44

140.88

128.64  
128.52  
126.35

77.48  
77.16  
76.84

52.16  
47.48  
44.55

33.15  
31.60

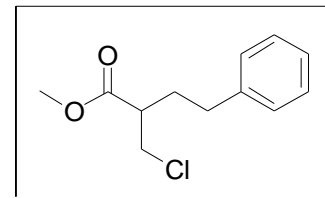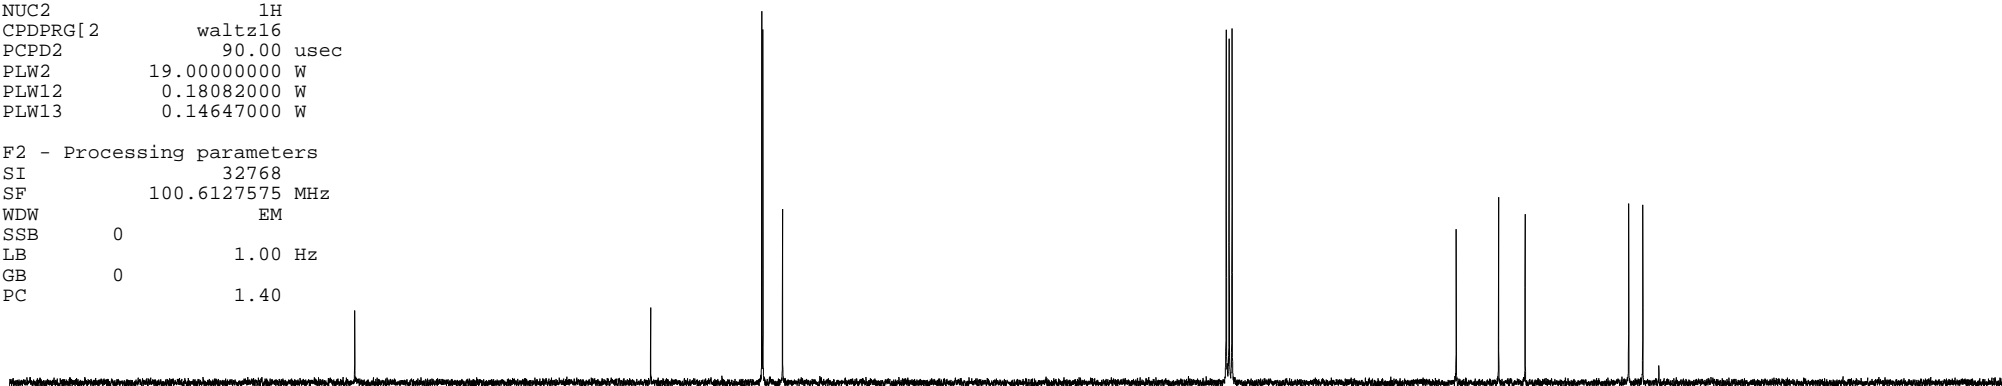

200 190 180 170 160 150 140 130 120 110 100 90 80 70 60 50 40 30 20 10 ppm

Current Data Parameters  
NAME YXL-9-51-1-1-1-H-20150114  
EXPNO 12  
PROCNO 1

F2 - Acquisition Parameters

Date\_ 20150114  
Time 10.16  
INSTRUM spect  
PROBHD 5 mm PABBO BB-  
PULPROG zg30  
TD 65536  
SOLVENT CDC13  
NS 16  
DS 2  
SWH 8223.685 Hz  
FIDRES 0.125483 Hz  
AQ 3.9846387 sec  
RG 93.19  
DW 60.800 usec  
DE 6.50 usec  
TE 298.0 K  
D1 1.00000000 sec  
TD0 1

==== CHANNEL f1 =====  
NUC1 1H  
P1 14.83 usec  
PLW1 13.00199986 W  
SFO1 400.1324710 MHz

F2 - Processing parameters  
SI 65536  
SF 400.1300107 MHz  
WDW EM  
SSB 0  
LB 0.30 Hz  
GB 0  
PC 1.00

7.3131  
7.2953  
7.2765  
7.2579  
7.2236  
7.2055  
7.1996  
7.1886  
7.1705

3.7444  
3.3917  
3.3719  
3.3670  
3.3475  
3.3146  
3.3011  
3.2898  
3.2763  
2.7795  
2.7658  
2.7597  
2.7459  
2.7397  
2.7321  
2.7260  
2.7123  
2.6729  
2.6548  
2.6511  
2.6327  
2.6154  
2.1165  
2.0960  
2.0818  
2.0780  
2.0611  
2.0440  
1.9434  
1.9290  
1.9257  
1.9207  
1.9112  
1.9087  
1.8946  
1.8897  
1.8764  
1.8732  
1.8689  
1.8547

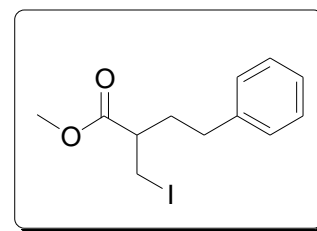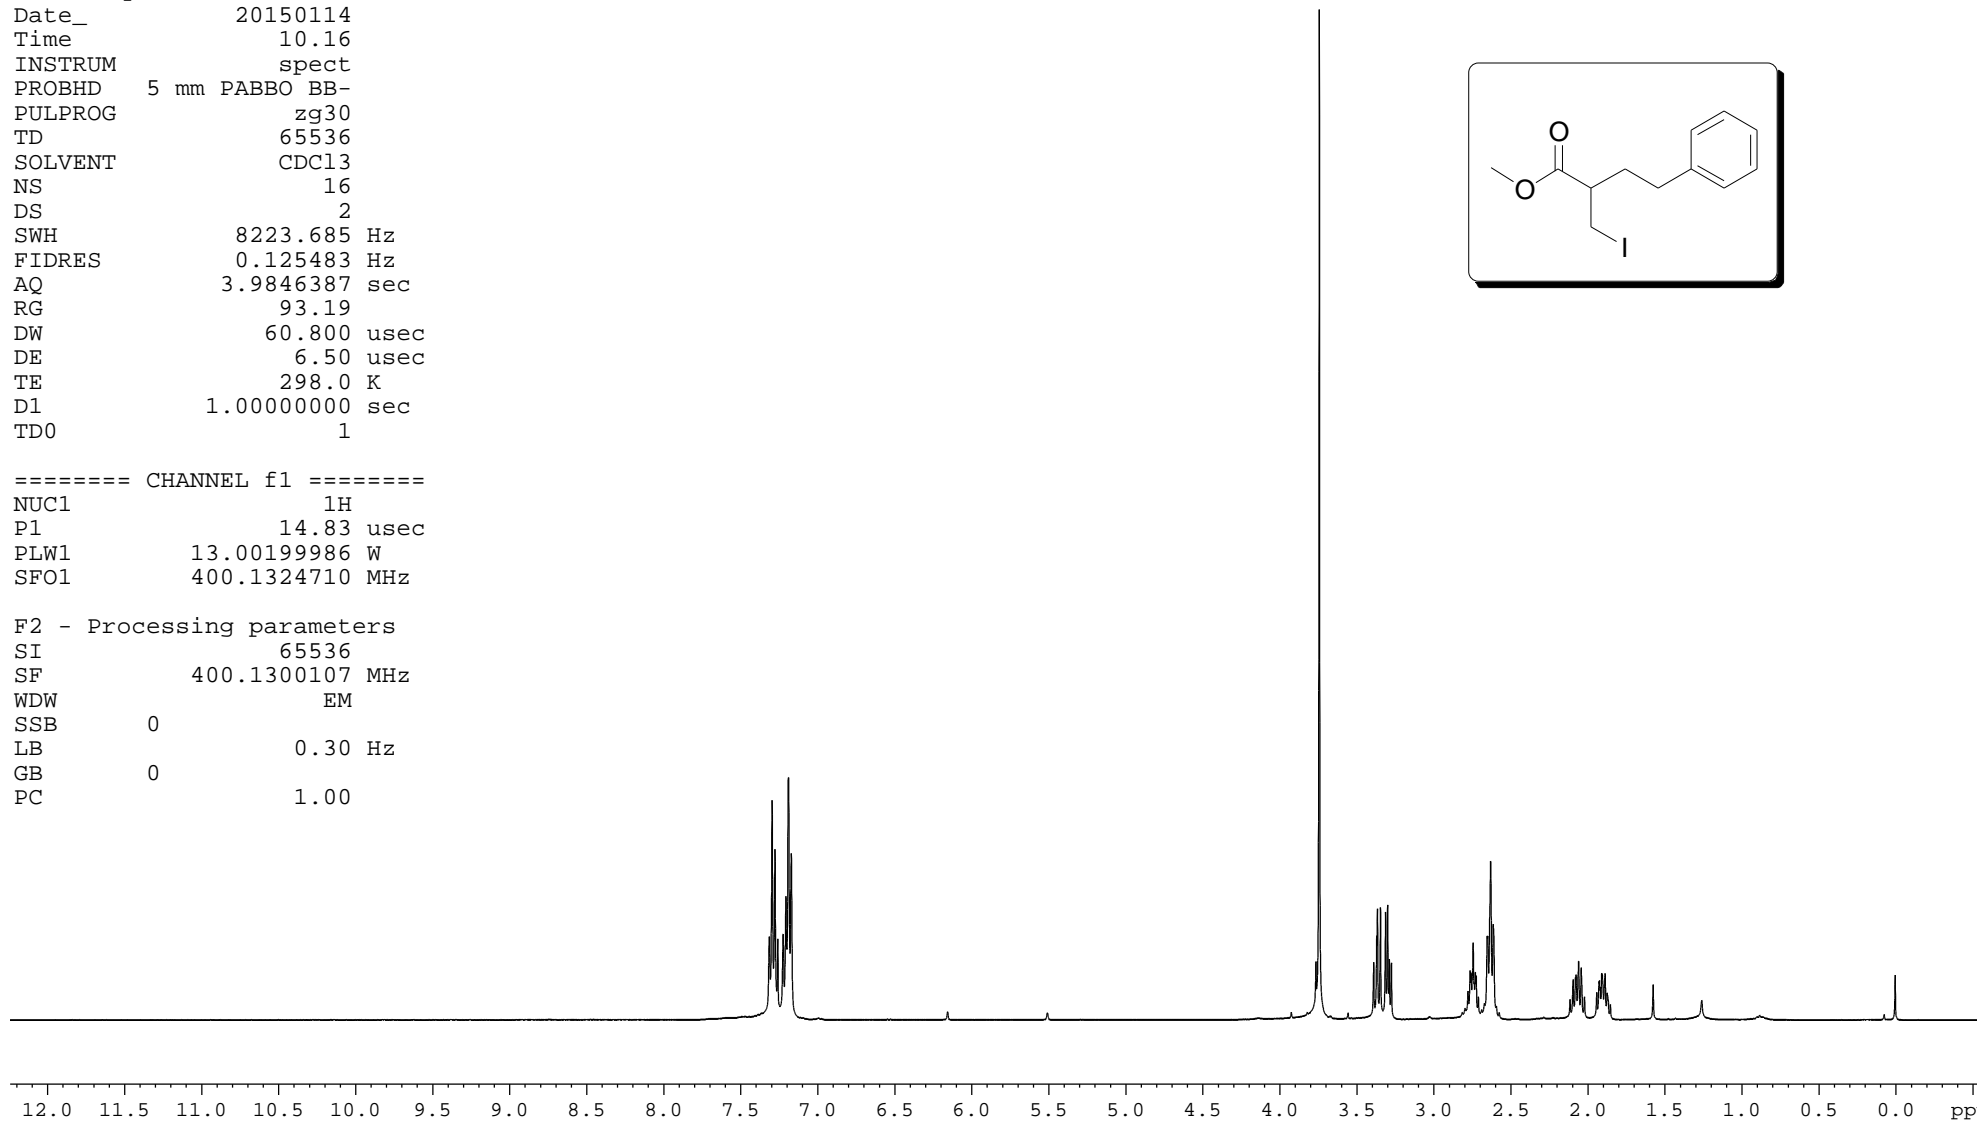

2.19  
2.90

2.98

1.91

1.12  
1.96

1.00  
0.96

— 173.54

— 140.87

128.65  
128.54  
126.36

— 52.19

— 47.50

34.68  
33.17

— 4.94

Current Data Parameters  
NAME 5B-C  
EXPNO 20  
PROCNO 1

F2 - Acquisition Parameters  
Date\_ 20141230  
Time 2.34  
INSTRUM spect  
PROBHD 5 mm PABBO BB-  
PULPROG zgpg30  
TD 65536  
SOLVENT CDCl3  
NS 500  
DS 4  
SWH 24038.461 Hz  
FIDRES 0.366798 Hz  
AQ 1.3631988 sec  
RG 209.25  
DW 20.800 usec  
DE 6.50 usec  
TE 299.2 K  
D1 2.00000000 sec  
D11 0.03000000 sec  
TD0 1

==== CHANNEL f1 =====  
NUC1 13C  
P1 10.59 usec  
PLW1 50.00299835 W  
SFO1 100.6228293 MHz

==== CHANNEL f2 =====  
CPDPRG2 waltz16  
NUC2 1H  
PCPD2 90.00 usec  
PLW2 13.00199986 W  
PLW12 0.35303000 W  
PLW13 0.28595001 W  
SFO2 400.1316005 MHz

F2 - Processing parameters  
SI 32768  
SF 100.6127551 MHz  
WDW EM  
SSB 0  
LB 1.00 Hz  
GB 0  
PC 1.40

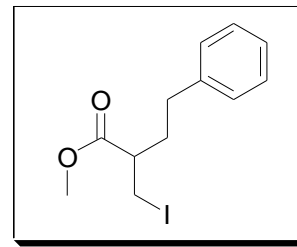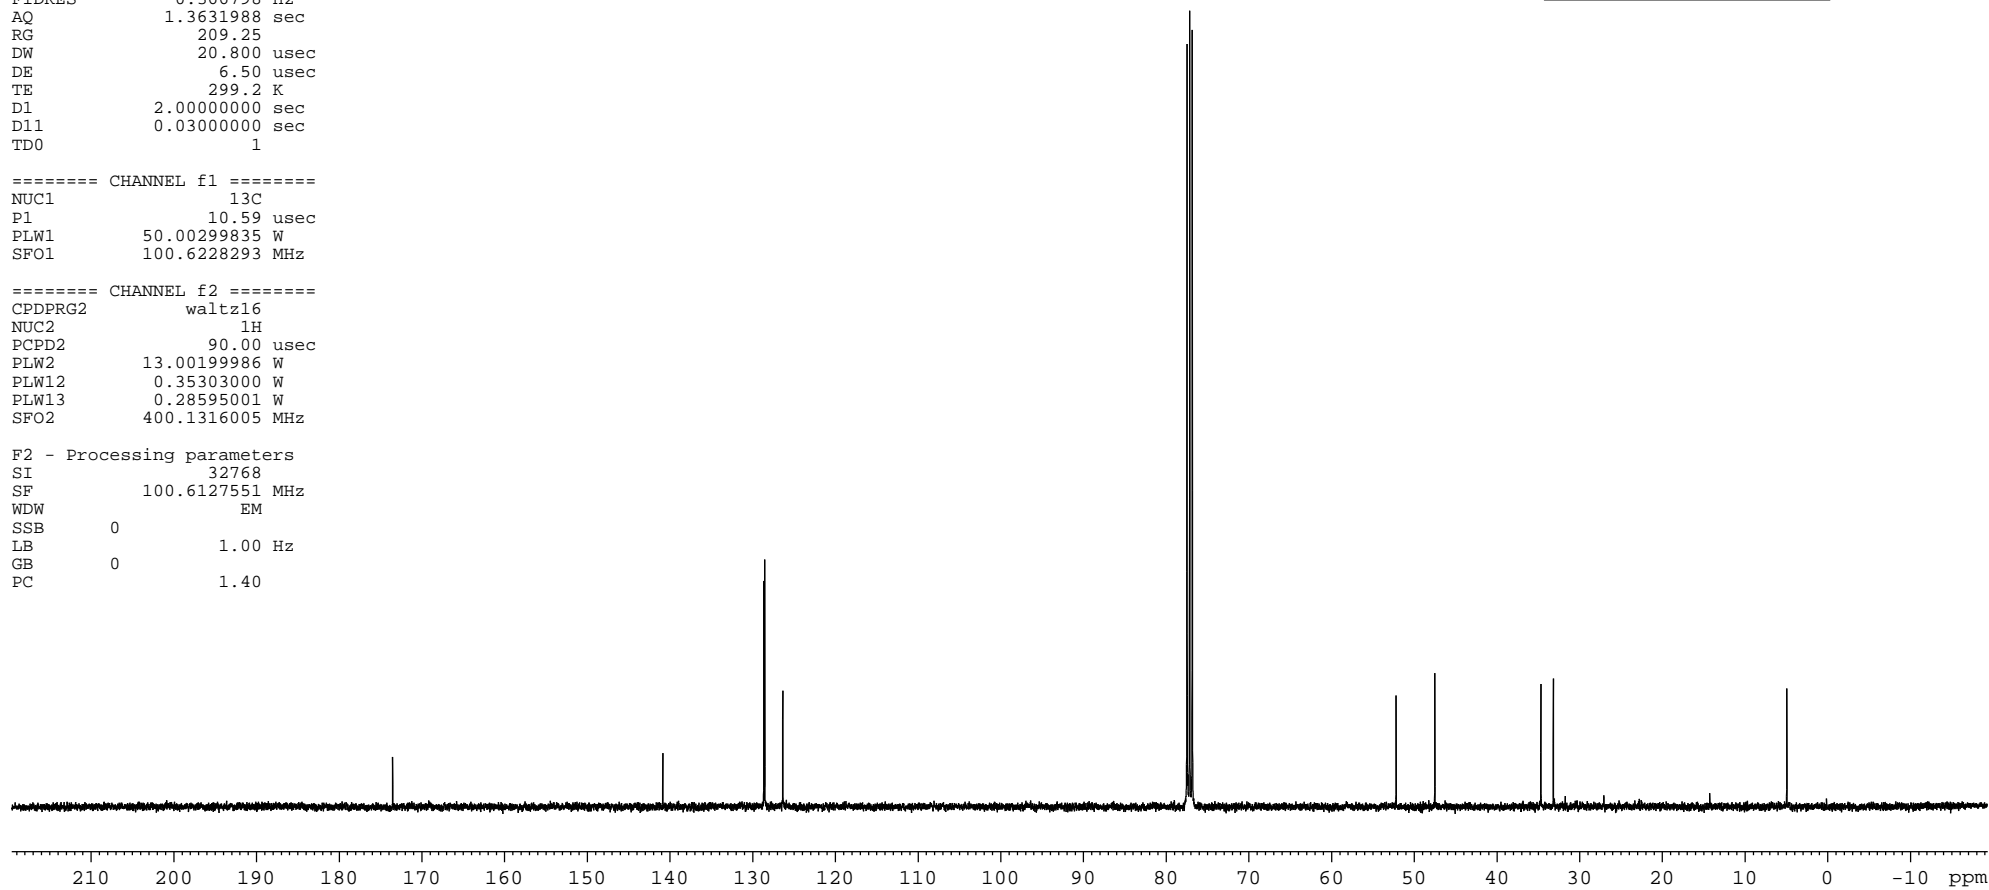

Current Data Parameters  
 NAME YXL-9-139-1-2-H-20150213  
 EXPNO 10  
 PROCNO 1

F2 - Acquisition Parameters  
 Date\_ 20150213  
 Time 21.45  
 INSTRUM spect  
 PROBHD 5 mm PABBO BB-  
 PULPROG zg30  
 TD 65536  
 SOLVENT CDC13  
 NS 16  
 DS 2  
 SWH 8223.685 Hz  
 FIDRES 0.125483 Hz  
 AQ 3.9846387 sec  
 RG 165.63  
 DW 60.800 usec  
 DE 6.50 usec  
 TE 295.4 K  
 D1 1.00000000 sec  
 TD0 1

==== CHANNEL f1 =====  
 NUC1 1H  
 P1 14.83 usec  
 PLW1 13.00199986 W  
 SFO1 400.1324710 MHz

F2 - Processing parameters  
 SI 65536  
 SF 400.1300098 MHz  
 WDW EM  
 SSB 0  
 LB 0.30 Hz  
 GB 0  
 PC 1.00

8.7968  
 8.7867  
 8.4764  
 8.4552  
 7.4983  
 7.4880  
 7.4771  
 7.4667  
 7.3979  
 7.3776  
 7.2599  
 6.8411  
 6.8208

5.0176

8.797  
 8.787

8.476  
 8.455

7.498  
 7.488  
 7.477  
 7.467  
 7.398  
 7.378  
 7.260

6.841  
 6.821

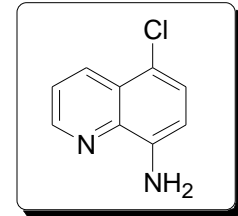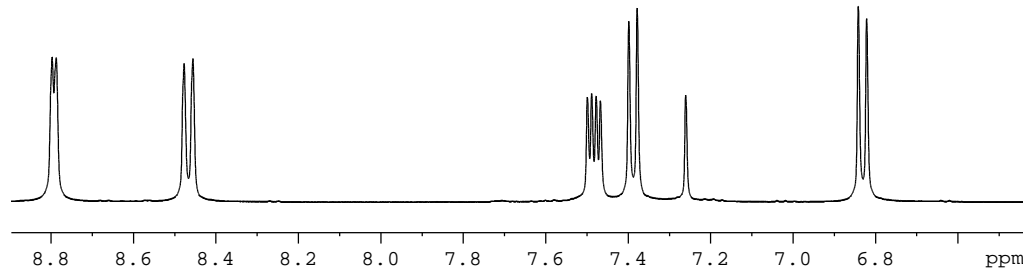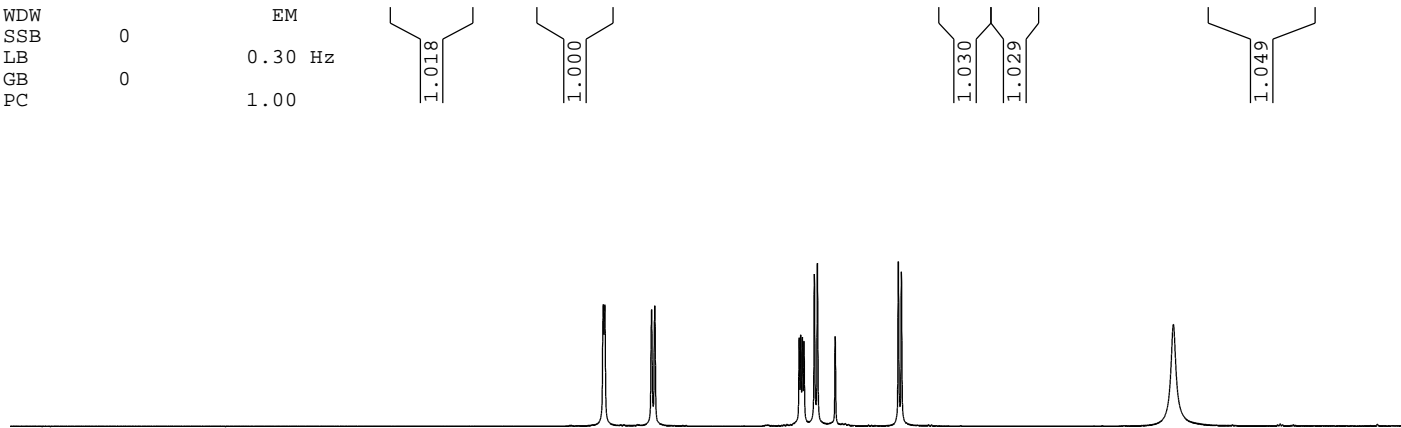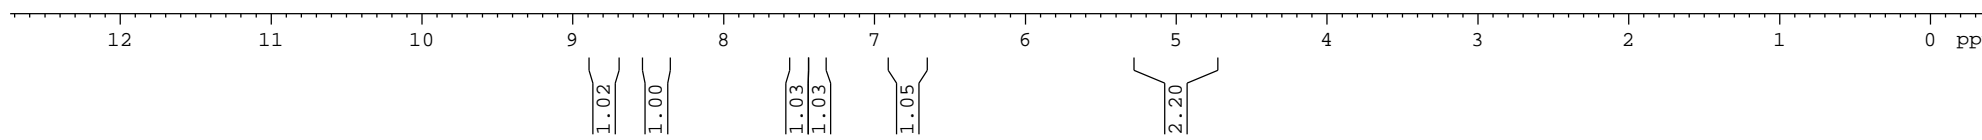

Current Data Parameters  
NAME YXL-9-139-1-2-C-20150213  
EXPNO 20  
PROCNO 1

F2 - Acquisition Parameters  
Date\_ 20150213  
Time 22.03  
INSTRUM spect  
PROBHD 5 mm PABBO BB-  
PULPROG zgpg30  
TD 65536  
SOLVENT CDCl3  
NS 200  
DS 4  
SWH 24038.461 Hz  
FIDRES 0.366798 Hz  
AQ 1.3631988 sec  
RG 209.25  
DW 20.800 usec  
DE 6.50 usec  
TE 296.1 K  
D1 2.00000000 sec  
D11 0.03000000 sec  
TD0 1

— 147.91  
— 143.43  
— 138.90  
— 133.02  
— 127.36  
— 126.66  
— 122.21  
— 118.17  
— 109.59

77.47  
77.16  
76.84

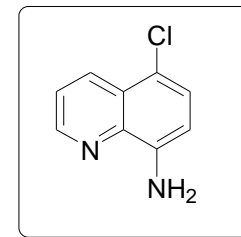

=====  
CHANNEL f1  
NUC1 13C  
P1 10.59 usec  
PLW1 50.00299835 W  
SFO1 100.6228293 MHz

=====  
CHANNEL f2  
CPDPRG2 waltz16  
NUC2 1H  
PCPD2 90.00 usec  
PLW2 13.00199986 W  
PLW12 0.35303000 W  
PLW13 0.28595001 W  
SFO2 400.1316005 MHz

F2 - Processing parameters  
SI 32768  
SF 100.6127570 MHz  
WDW EM  
SSB 0  
LB 1.00 Hz  
GB 0  
PC 1.40

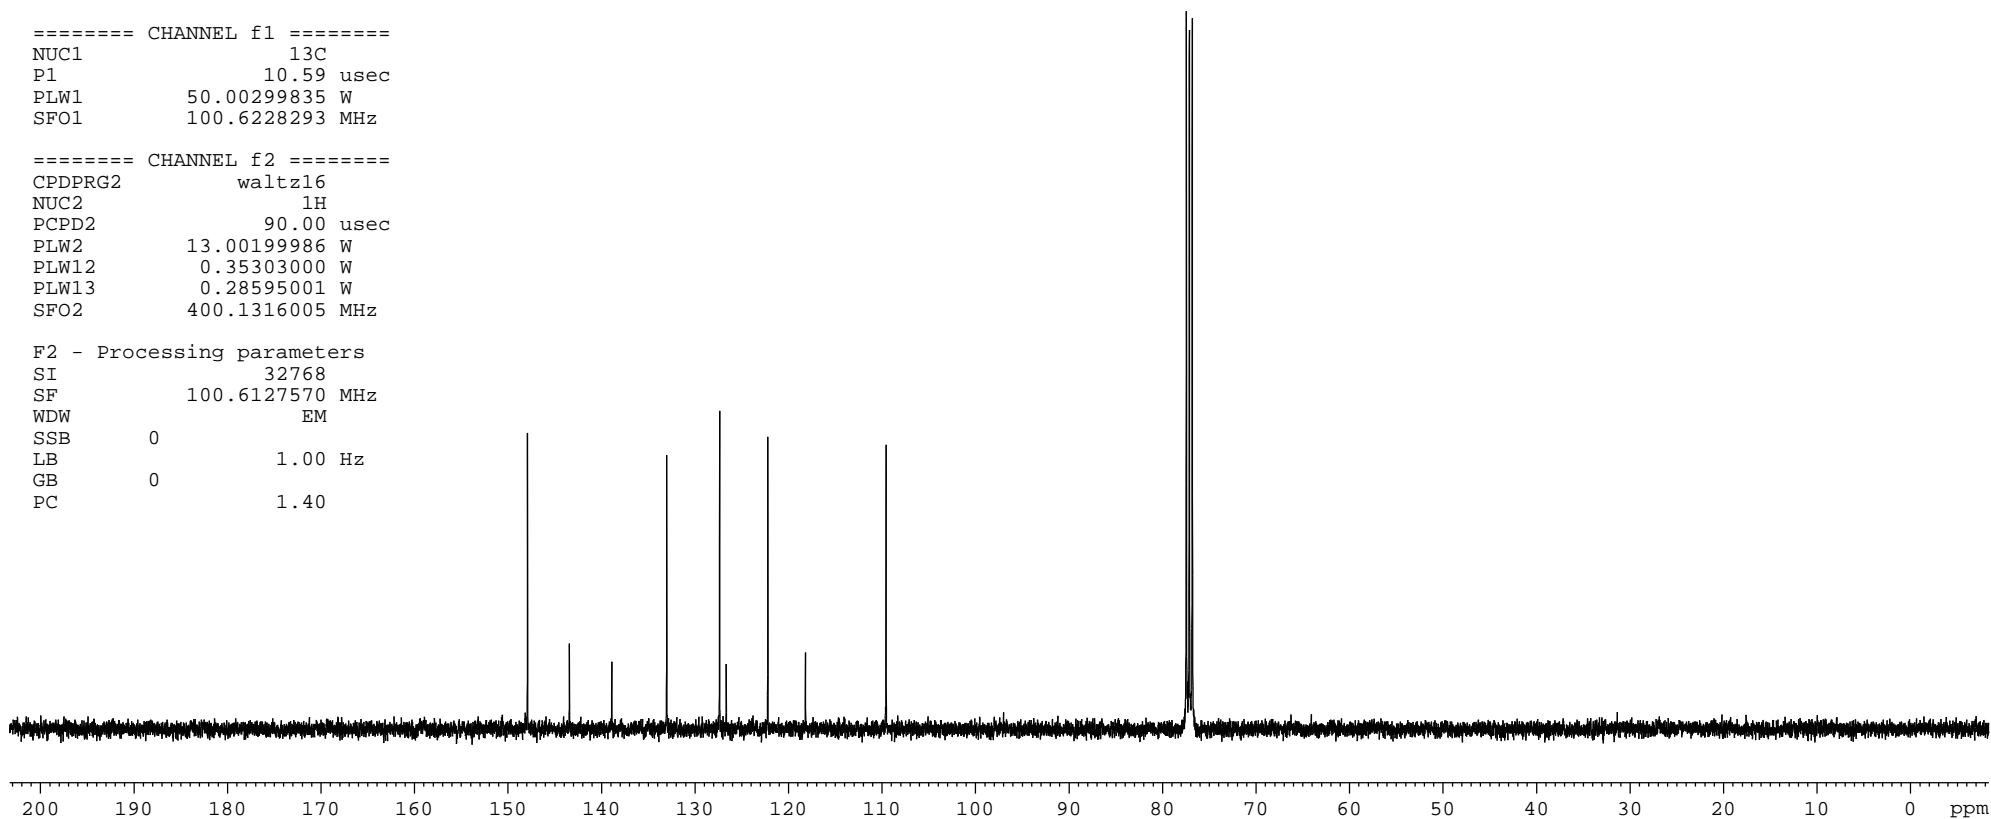



10.2827

8.8385  
8.8298  
8.7690  
8.7481  
8.5526  
8.5316  
7.6065  
7.5856  
7.5616  
7.5515  
7.5408  
7.5306  
7.3054  
7.2868  
7.2690  
7.2039  
7.1876

5.9842

5.4967

2.9316  
2.9146  
2.8945  
2.8330  
2.8132  
2.7961

Current Data Parameters  
NAME YXL-9-ELIMINATED-20150122  
EXPNO 10  
PROCNO 1

F2 - Acquisition Parameters

Date\_ 20150122  
Time 9.30  
INSTRUM spect  
PROBHD 5 mm PABBO BB-  
PULPROG zg30  
TD 65536  
SOLVENT CDCl3  
NS 16  
DS 2  
SWH 8223.685 Hz  
FIDRES 0.125483 Hz  
AQ 3.9846387 sec  
RG 63.51  
DW 60.800 usec  
DE 6.50 usec  
TE 299.0 K  
D1 1.0000000 sec  
TD0 1

==== CHANNEL f1 =====  
NUC1 1H  
P1 14.83 usec  
PLW1 13.0019986 W  
SFO1 400.1324710 MHz

F2 - Processing parameters  
SI 65536  
SF 400.1300172 MHz  
WDW EM  
SSB 0  
LB 0.30 Hz  
GB 0  
PC 1.00

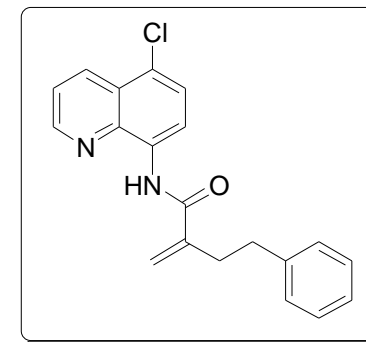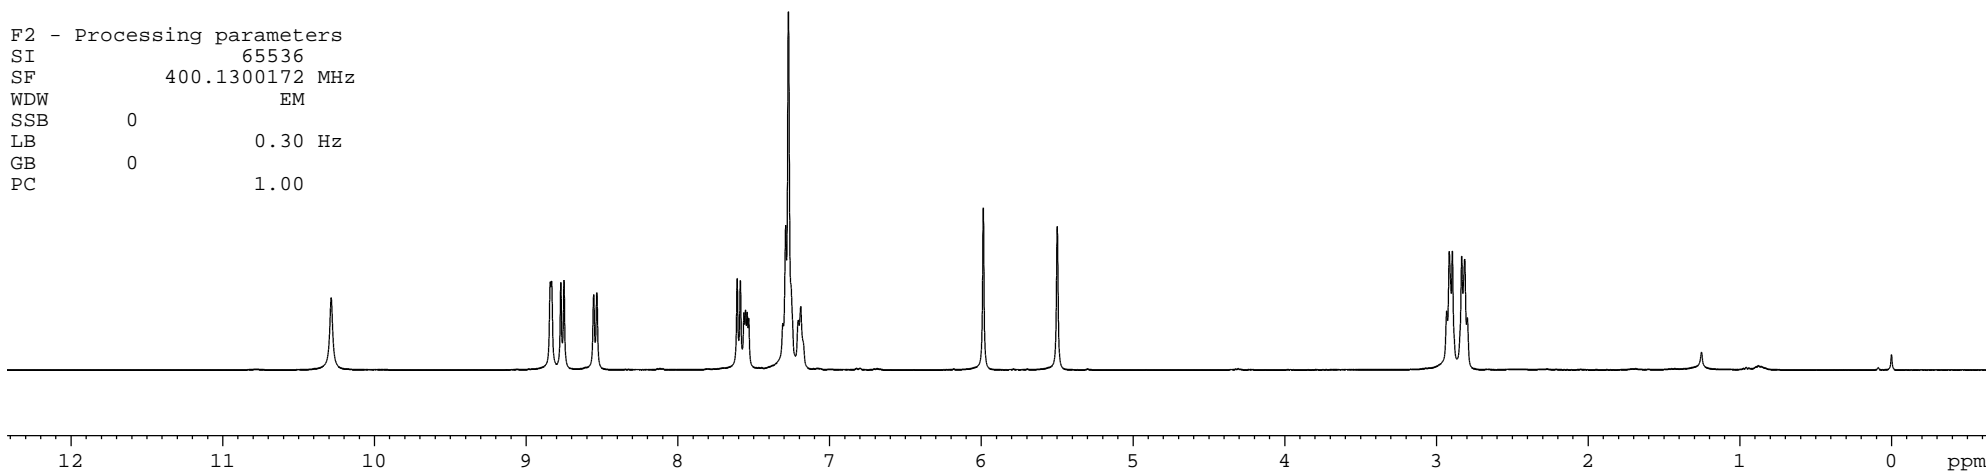

0.99

1.04  
1.00  
0.97

2.05  
4.21  
0.99

1.00

0.99

2.17  
2.03

Current Data Parameters  
NAME YXL-9-ELIMINATED-C-20150122  
EXPNO 20  
PROCNO 1

F2 - Acquisition Parameters  
Date\_ 20150122  
Time 9.35  
INSTRUM spect  
PROBHD 5 mm PABBO BB-  
PULPROG zgpg30  
TD 65536  
SOLVENT CDC13  
NS 63  
DS 4  
SWH 24038.461 Hz  
FIDRES 0.366798 Hz  
AQ 1.3631988 sec  
RG 209.25  
DW 20.800 usec  
DE 6.50 usec  
TE 299.7 K  
D1 2.00000000 sec  
D11 0.03000000 sec  
TD0 1

==== CHANNEL f1 =====  
NUC1 13C  
P1 10.59 usec  
PLW1 50.00299835 W  
SFO1 100.6228293 MHz

==== CHANNEL f2 =====  
CPDPRG2 waltz16  
NUC2 1H  
PCPD2 90.00 usec  
PLW2 13.00199986 W  
PLW12 0.35303000 W  
PLW13 0.28595001 W  
SFO2 400.1316005 MHz

F2 - Processing parameters  
SI 32768  
SF 100.6127603 MHz  
WDW EM  
SSB 0  
LB 1.00 Hz  
GB 0  
PC 1.40

166.53

148.80  
145.06  
141.36  
139.27  
133.84  
133.52  
128.65  
128.51  
127.36  
126.15  
126.05  
124.51  
122.46  
119.94  
116.51

77.48  
77.16  
76.84

35.01  
34.55

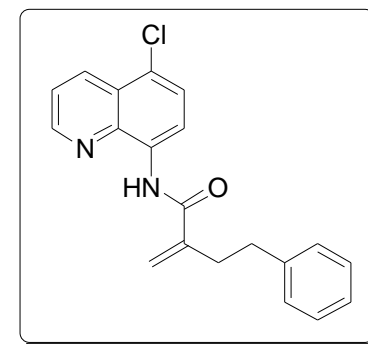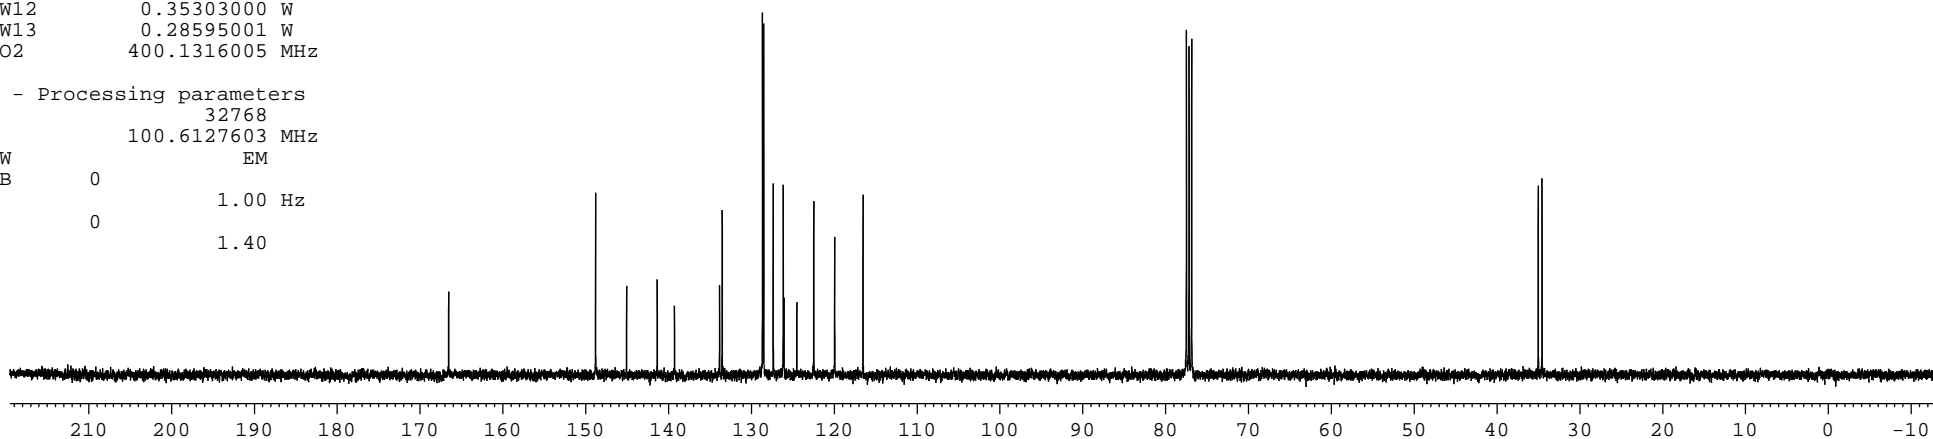

Current Data Parameters  
 NAME YXL-9-75-H-20150117  
 EXPNO 20  
 PROCNO 1

F2 - Acquisition Parameters  
 Date\_ 20150117  
 Time 20.55  
 INSTRUM spect  
 PROBHD 5 mm PABBO BB-  
 PULPROG zg30  
 TD 65536  
 SOLVENT CDCl3  
 NS 16  
 DS 2  
 SWH 8223.685 Hz  
 FIDRES 0.125483 Hz  
 AQ 3.9846387 sec  
 RG 93.19  
 DW 60.800 usec  
 DE 6.50 usec  
 TE 297.8 K  
 D1 1.00000000 sec  
 TD0 1

==== CHANNEL f1 =====  
 NUC1 1H  
 P1 14.83 usec  
 PLW1 13.00199986 W  
 SFO1 400.1324710 MHz

F2 - Processing parameters  
 SI 65536  
 SF 400.1300105 MHz  
 WDW EM  
 SSB 0  
 LB 0.30 Hz  
 GB 0  
 PC 1.00

9.9344  
 8.8843  
 8.8809  
 8.8740  
 8.8706  
 8.7812  
 8.7602  
 8.5942  
 8.5907  
 8.5729  
 8.5695  
 7.6315  
 7.6104  
 7.6062  
 7.5952  
 7.5844  
 7.5739  
 7.3017  
 7.2815  
 7.2647  
 7.2596  
 7.2205  
 7.2025

3.8082  
 3.7863  
 3.7780  
 3.7561  
 3.5386  
 3.5255  
 3.5083  
 3.4953  
 2.8402  
 2.8262  
 2.8173  
 2.8048  
 2.7916  
 2.7828  
 2.7688  
 2.7495  
 2.7366  
 2.7276  
 2.7126  
 2.6917  
 2.6757  
 2.6538  
 2.2361  
 2.2220  
 2.2136  
 2.2004  
 2.1885  
 2.1790  
 2.1653  
 2.1568  
 2.1427  
 1.9848  
 1.9723  
 1.9663  
 1.9622  
 1.9502  
 1.9437  
 1.9385  
 1.9317  
 1.9199  
 1.9157  
 1.9098  
 1.8971

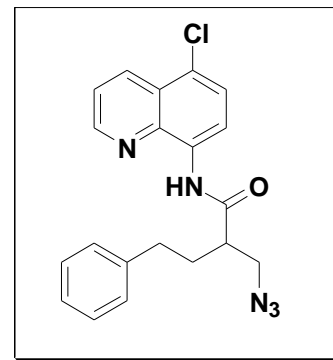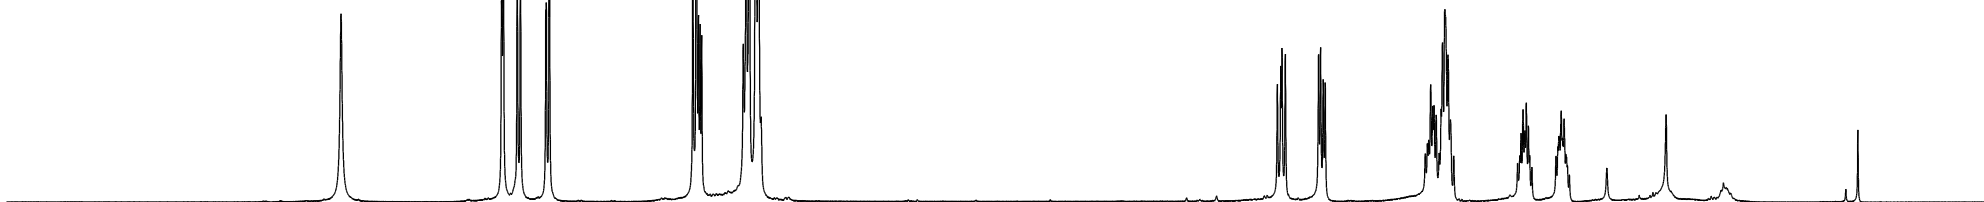

12 11 10 9 8 7 6 5 4 3 2 1 0 ppm

0.99  
 1.02  
 1.04  
 1.00  
 2.10  
 5.33  
 1.03  
 1.00  
 3.14  
 1.06  
 1.02

Current Data Parameters  
NAME YXL-9-75-C-20150117  
EXPNO 22  
PROCNO 1

171.61

148.91  
140.86  
139.12  
133.55  
133.48  
128.70  
128.58  
127.32  
126.37  
126.08  
124.88  
122.55  
116.87

77.48  
77.16  
76.84

53.45  
48.02

33.32  
31.99

F2 - Acquisition Parameters

Date\_ 20150118  
Time 1.45  
INSTRUM spect  
PROBHD 5 mm PABBO BB-  
PULPROG zgpg30  
TD 65536  
SOLVENT CDC13  
NS 200  
DS 4  
SWH 24038.461 Hz  
FIDRES 0.366798 Hz  
AQ 1.3631988 sec  
RG 209.25  
DW 20.800 usec  
DE 6.50 usec  
TE 299.0 K  
D1 2.00000000 sec  
D11 0.03000000 sec  
TD0 1

=====  
CHANNEL f1  
NUC1 13C  
P1 10.59 usec  
PLW1 50.00299835 W  
SFO1 100.6228293 MHz

=====  
CHANNEL f2  
CPDPRG2 waltz16  
NUC2 1H  
PCPD2 90.00 usec  
PLW2 13.00199986 W  
PLW12 0.35303000 W  
PLW13 0.28595001 W  
SFO2 400.1316005 MHz

F2 - Processing parameters  
SI 32768  
SF 100.6127579 MHz  
WDW EM  
SSB 0  
LB 1.00 Hz  
GB 0  
PC 1.40

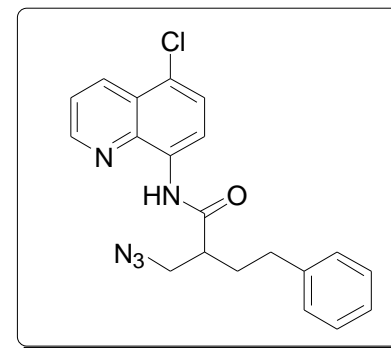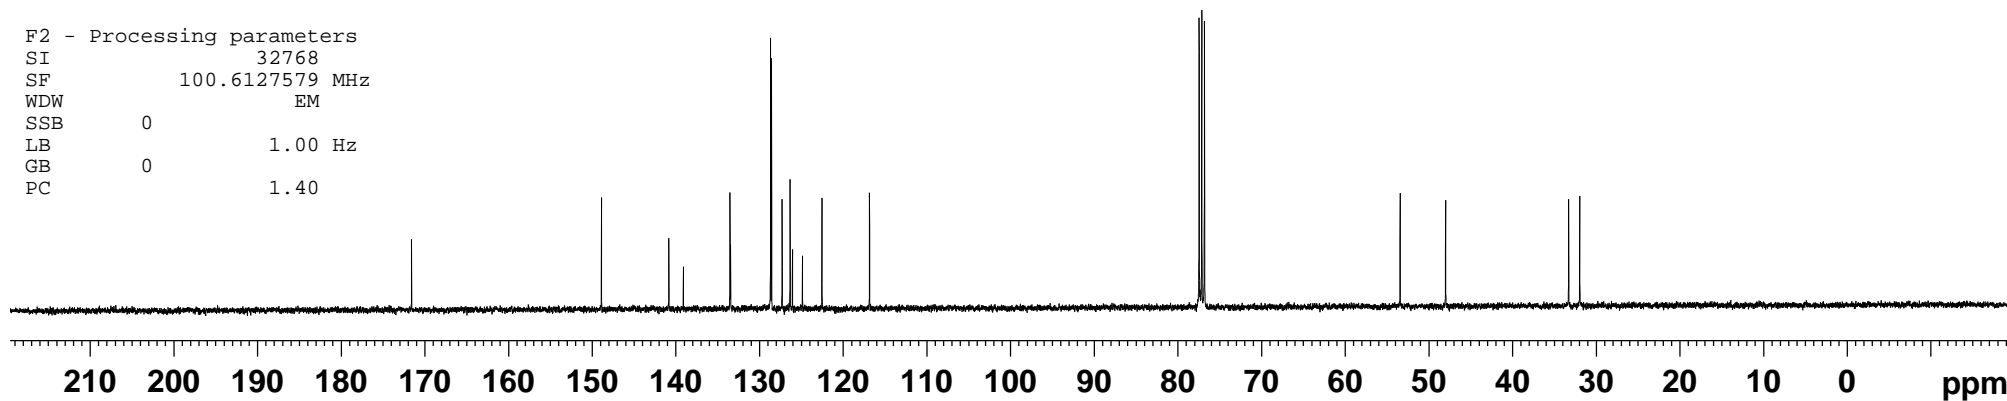

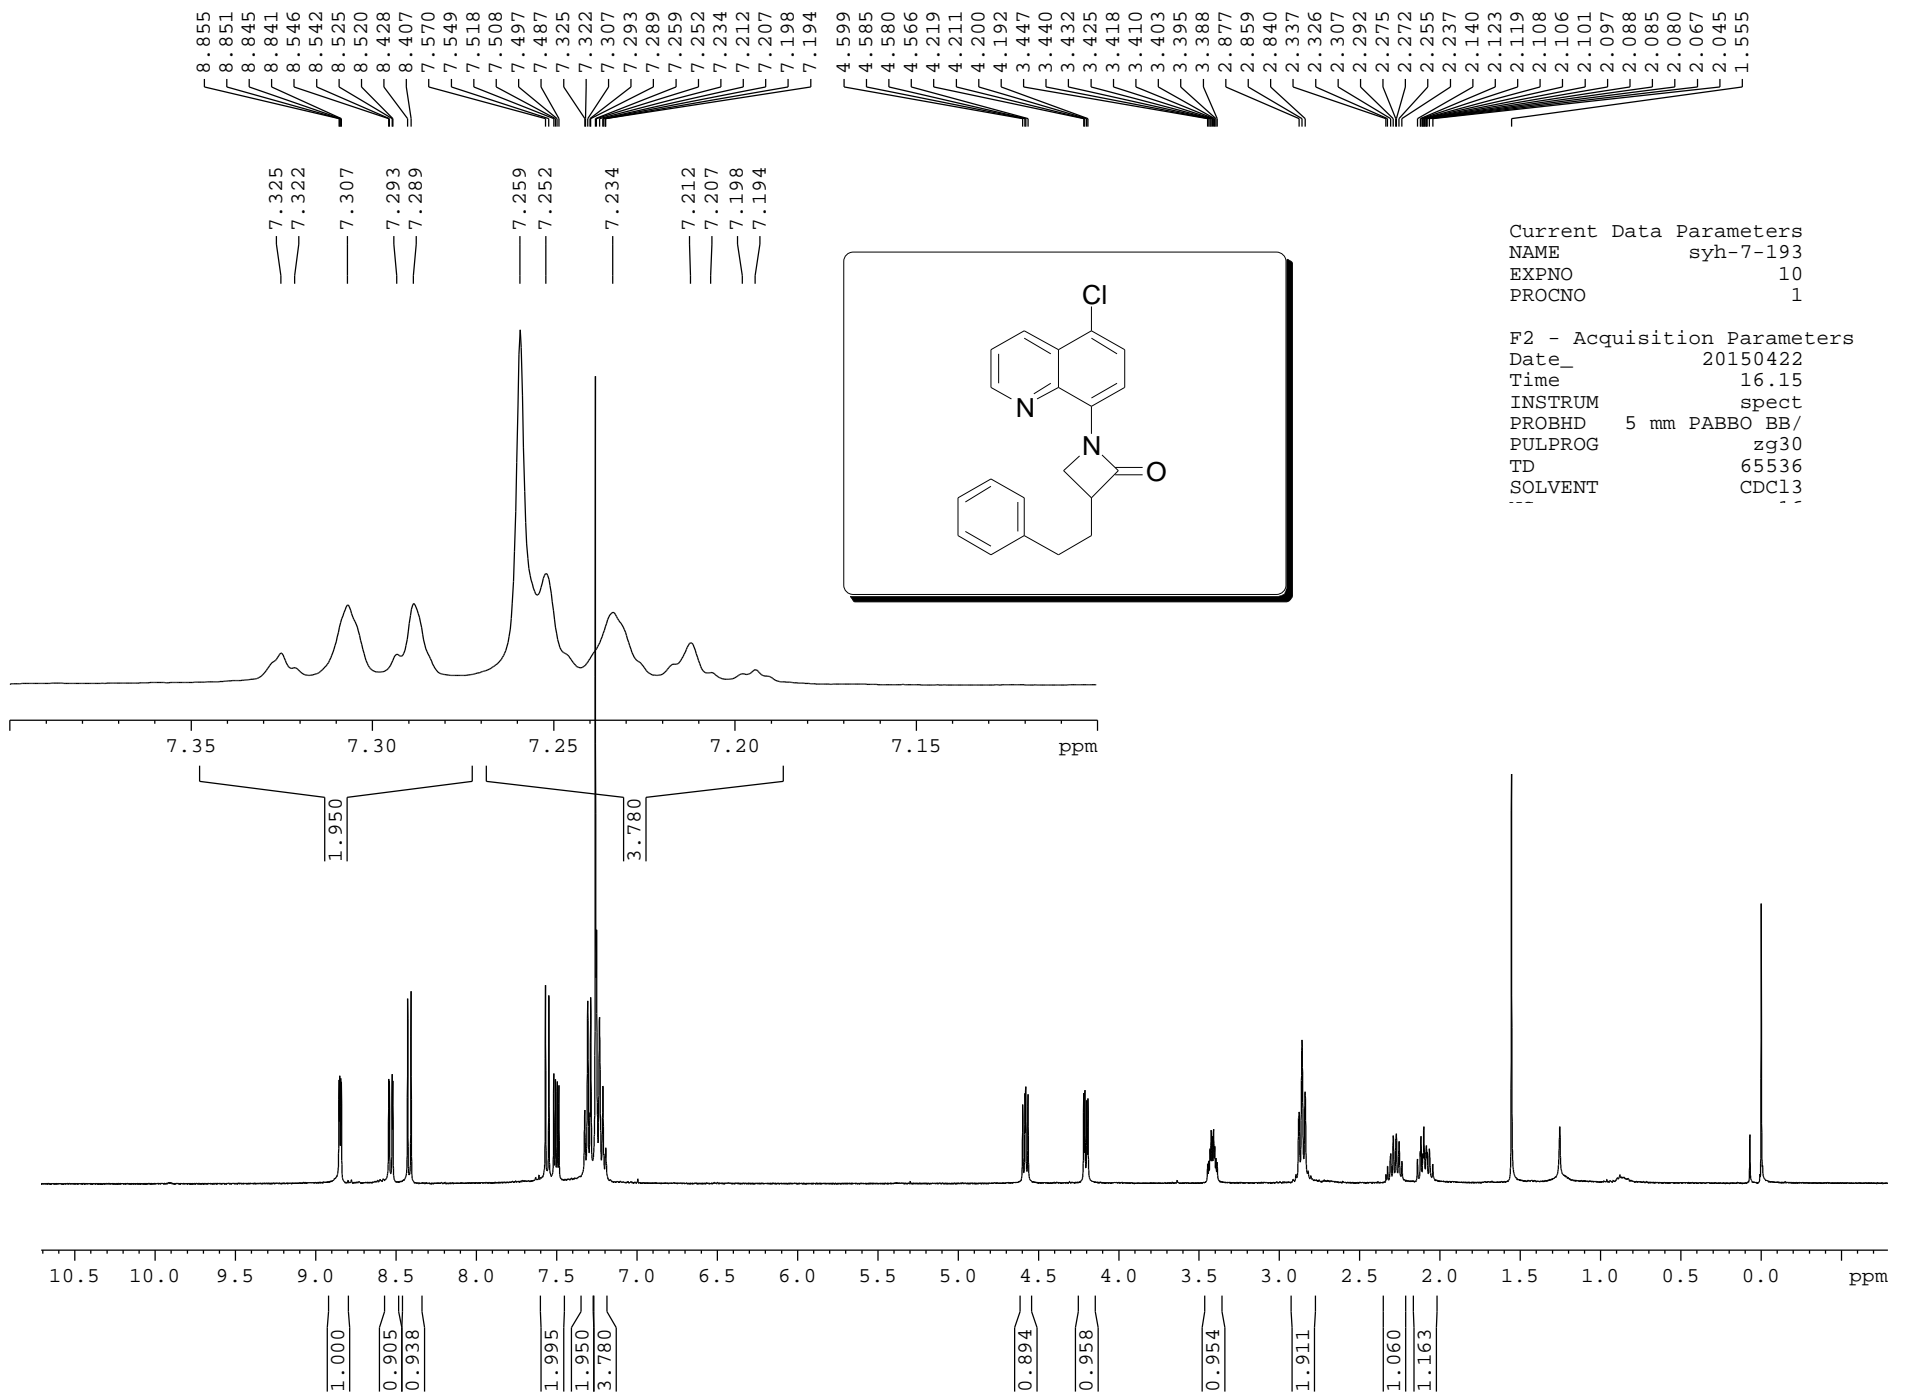

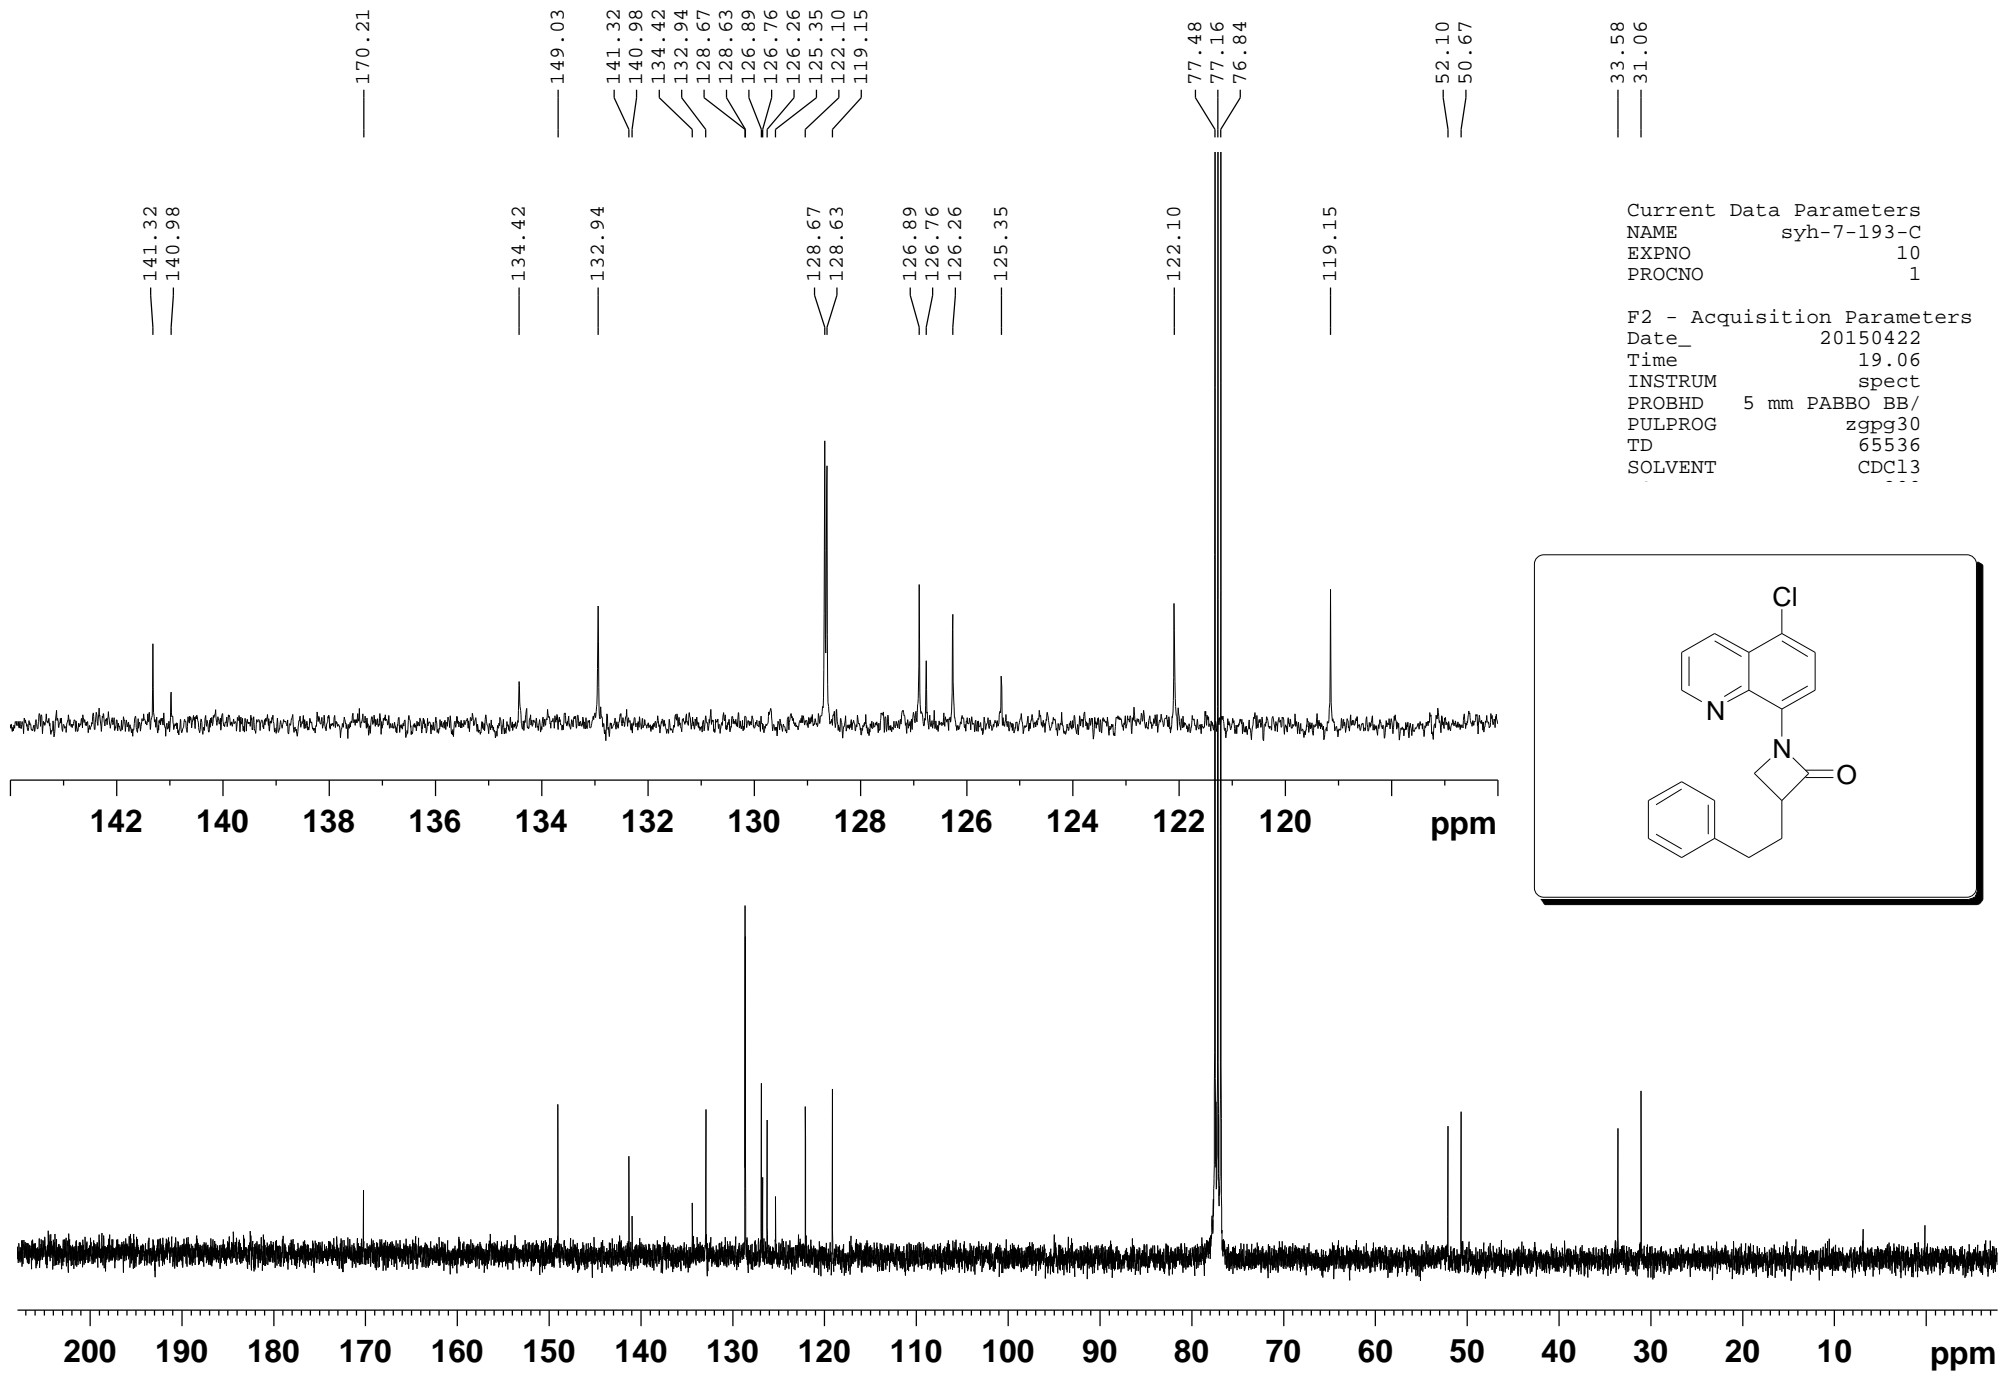

Current Data Parameters  
 NAME syh-7-193-C  
 EXPNO 10  
 PROCNO 1

F2 - Acquisition Parameters  
 Date\_ 20150422  
 Time 19.06  
 INSTRUM spect  
 PROBHD 5 mm PABBO BB/  
 PULPROG zgpg30  
 TD 65536  
 SOLVENT CDC13

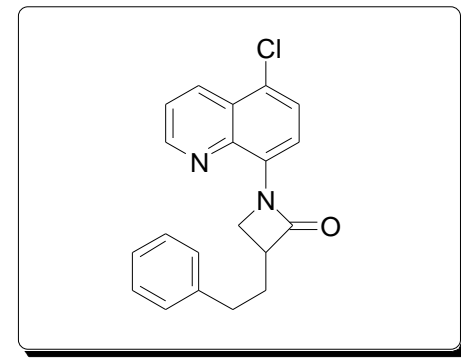

Current Data Parameters

NAME 6D-H  
EXPNO 10  
PROCNO 1

F2 - Acquisition Parameters

Date\_ 20150519  
Time 9.47  
INSTRUM spect  
PROBHD 5 mm PABBO BB/  
PULPROG zg30  
TD 65536  
SOLVENT CDCl3  
NS 16  
DS 2  
SWH 8012.820 Hz  
FIDRES 0.122266 Hz  
AQ 4.0894966 sec  
RG 80.88  
DW 62.400 usec  
DE 6.50 usec  
TE 297.0 K  
D1 1.00000000 sec  
TD0 1

==== CHANNEL f1 =====  
SFO1 400.1324710 MHz  
NUC1 1H  
P1 8.78 usec  
PLW1 19.00000000 W

F2 - Processing parameters

SI 65536  
SF 400.1300102 MHz  
WDW EM  
SSB 0  
LB 0.30 Hz  
GB 0  
PC 1.00

9.715  
8.832  
8.829  
8.822  
8.818  
8.683  
8.662  
8.567  
8.564  
8.546  
8.543  
7.600  
7.589  
7.579  
7.568  
7.557  
7.396  
7.282  
7.259  
7.245  
7.205  
7.192  
7.173  
4.733  
4.709  
4.699  
4.676  
4.589  
4.577  
4.555  
4.543  
3.747  
3.235  
3.224  
3.212  
3.201  
3.190  
2.864  
2.850  
2.841  
2.829  
2.816  
2.807  
2.791  
2.774  
2.761  
2.741  
2.721  
2.707  
2.686  
2.607  
2.520  
2.504  
2.480  
2.268  
2.253  
2.245  
2.232  
2.220  
2.211  
2.197  
2.189  
2.175  
2.011  
1.993  
1.988  
1.977  
1.958

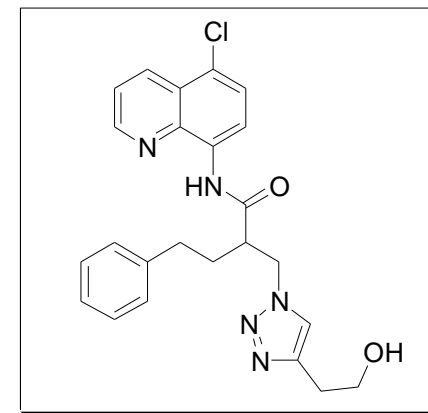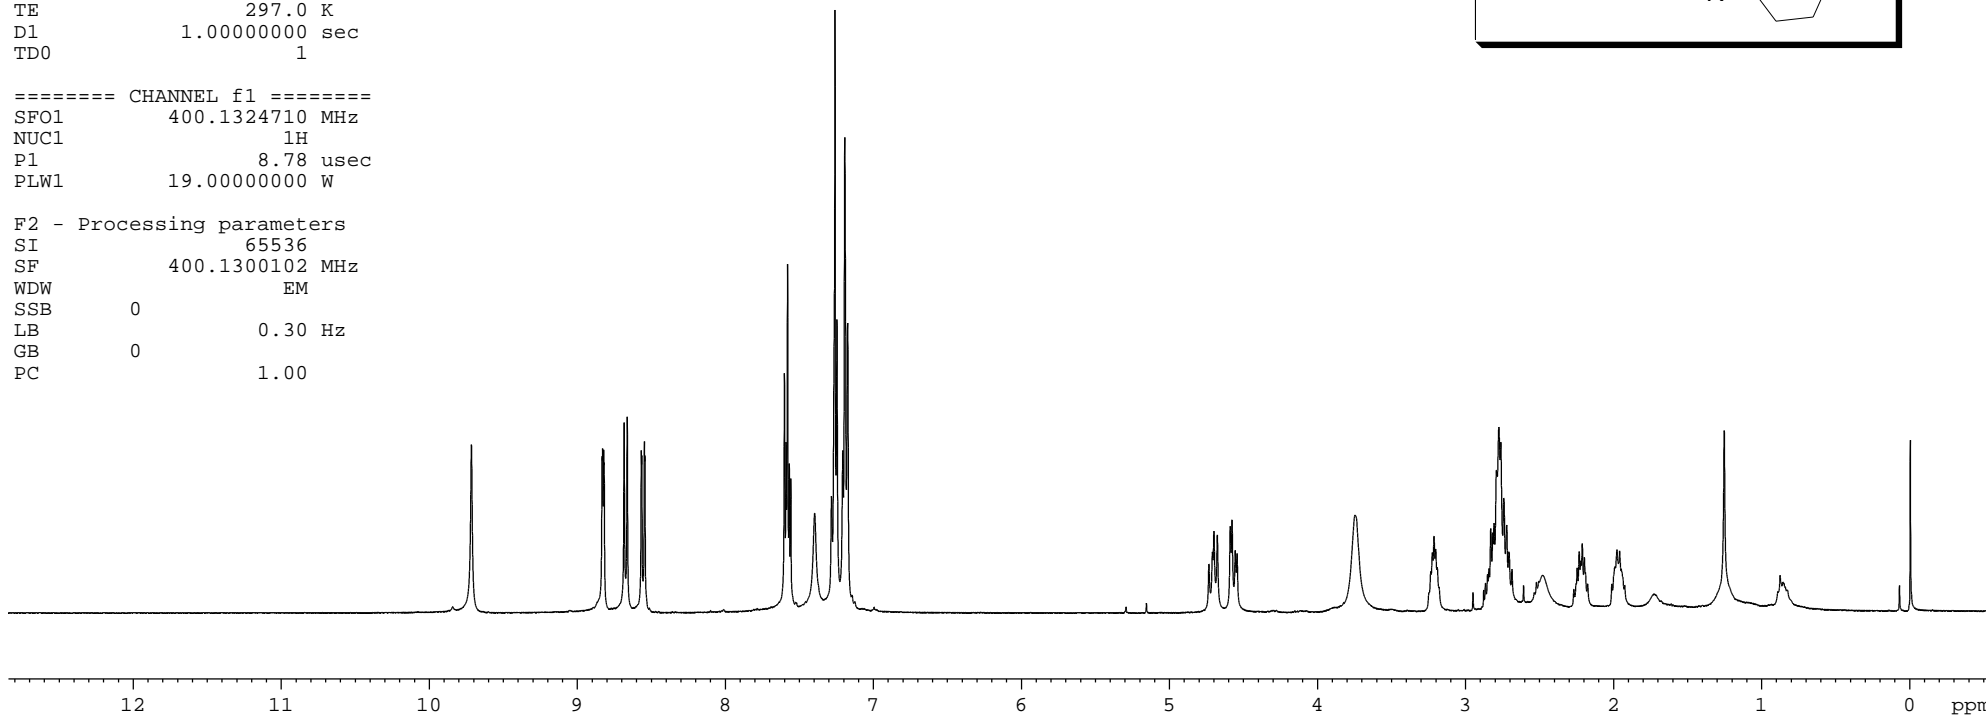

— 171.16  
 — 149.04  
 140.45  
 138.92  
 133.52  
 133.08  
 128.76  
 128.54  
 127.11  
 126.50  
 126.04  
 125.23  
 122.69  
 116.73

77.48  
 77.16  
 76.84

— 61.66

— 51.83  
 — 48.99

33.18  
 32.38  
 — 28.59

Current Data Parameters  
 NAME 6D-C  
 EXPNO 10  
 PROCNO 1

F2 - Acquisition Parameters

Date\_ 20150519  
 Time 21.50  
 INSTRUM spect  
 PROBHD 5 mm PABBO BB/  
 PULPROG zgpg30  
 TD 65536  
 SOLVENT CDC13  
 NS 520  
 DS 4  
 SWH 24038.461 Hz  
 FIDRES 0.366798 Hz  
 AQ 1.3631988 sec  
 RG 202.1  
 DW 20.800 usec  
 DE 6.50 usec  
 TE 297.0 K  
 D1 2.00000000 sec  
 d11 0.03000000 sec  
 DELTA 1.89999998 sec  
 TD0 1  
 NUC1 13C  
 P1 9.85 usec  
 PLW1 65.00000000 W  
 SFO1 100.6228293 MHz  
 CPDPRG2  
 NUC2 1H  
 PLW2 19.00000000 W  
 PLW12 0.18082000 W  
 PLW13 0.14647000 W  
 SFO2 400.1316005 MHz

F2 - Processing parameters

SI 32768  
 SF 100.6127577 MHz  
 WDW EM  
 SSB 0  
 LB 1.00 Hz  
 GB 0  
 PC 1.40

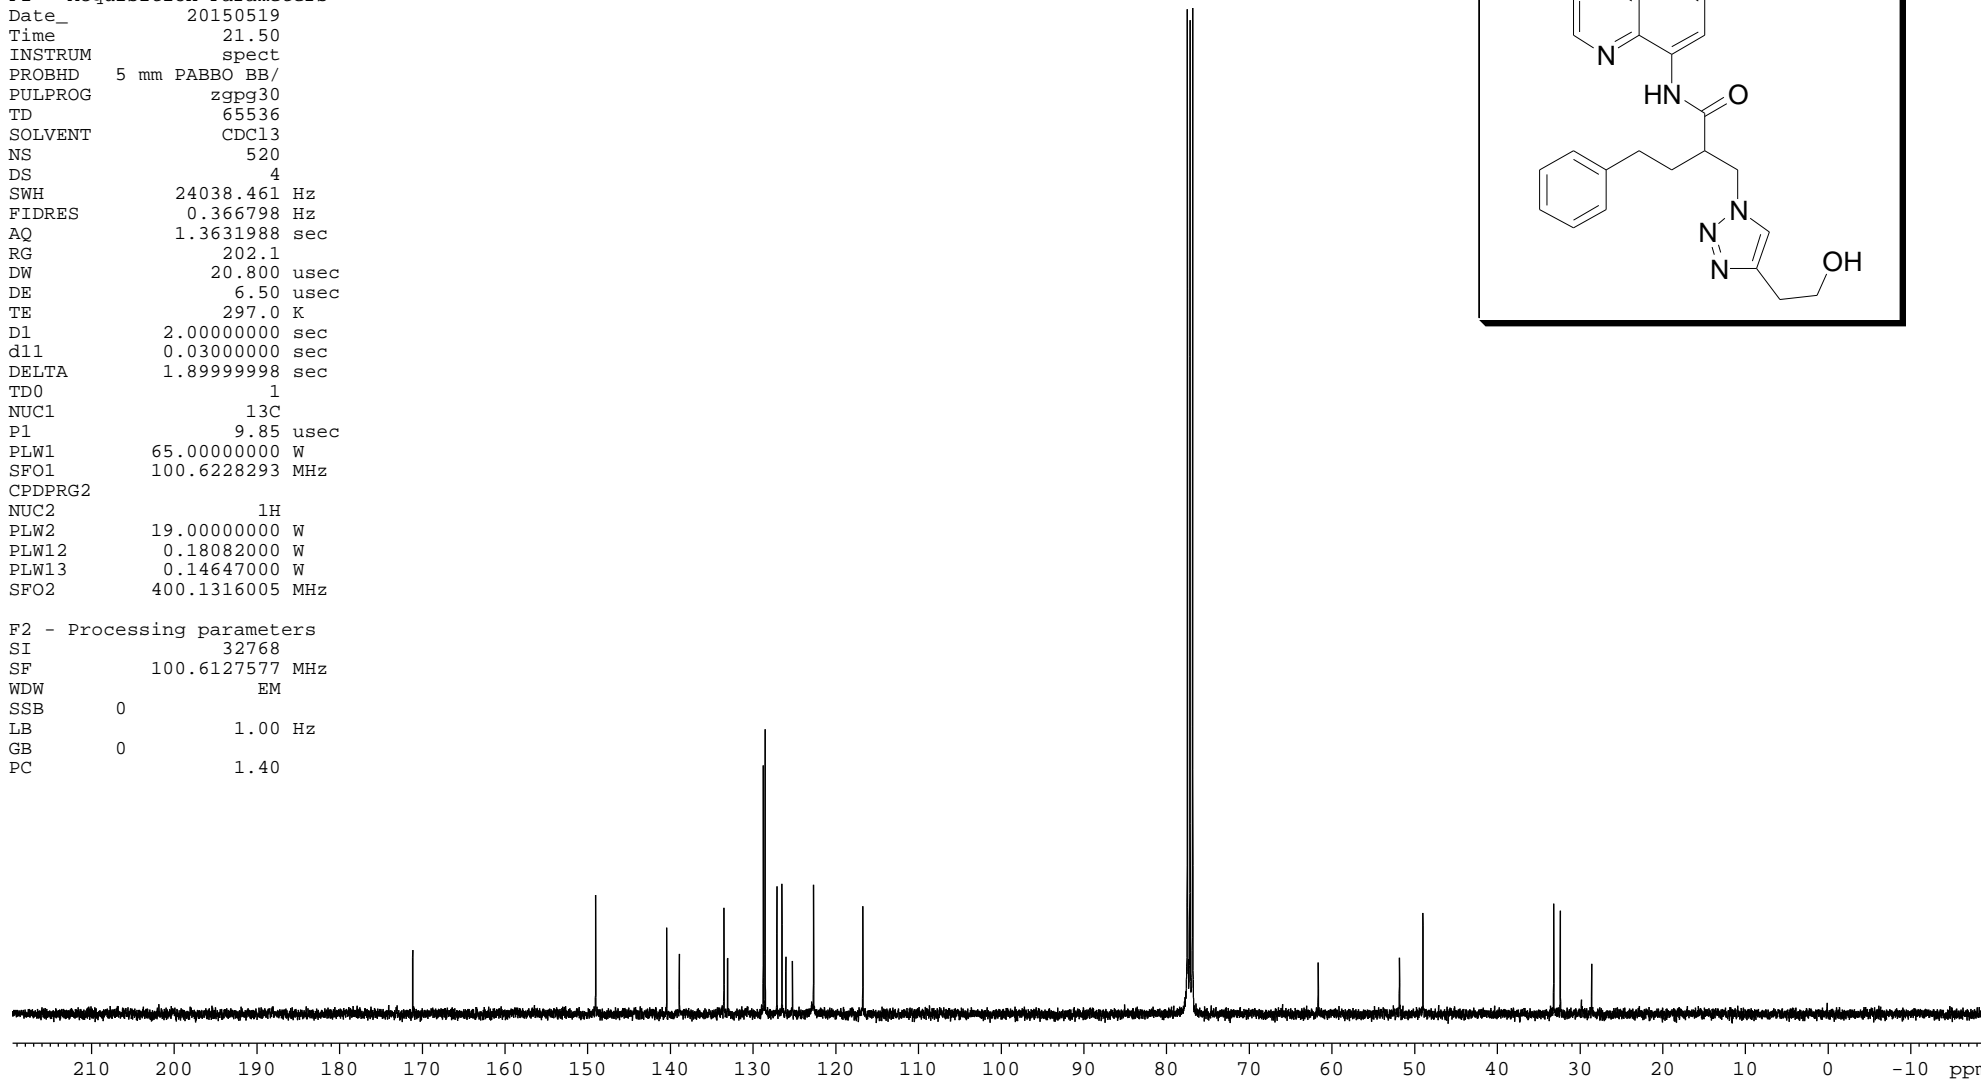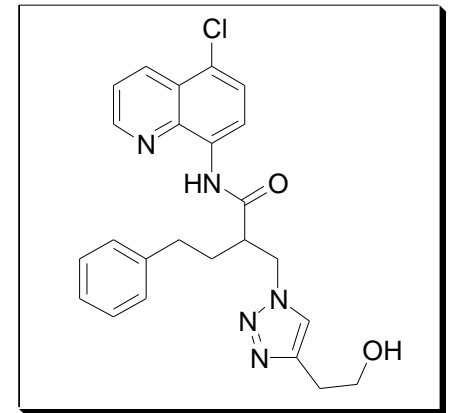



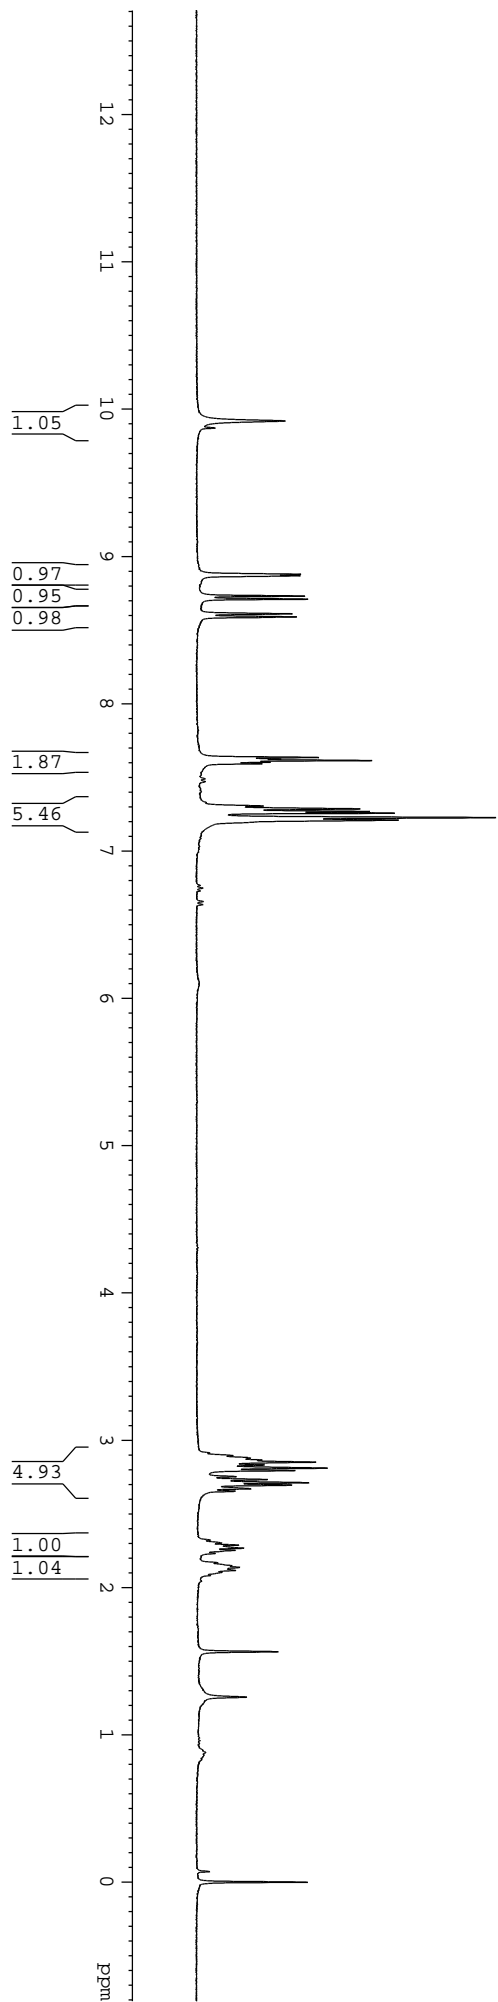

9.9215

8.8809  
8.8772  
8.8707  
8.7324  
8.7115  
8.6125  
8.5912  
7.6366  
7.6256  
7.6157  
7.6049  
7.5946  
7.3076  
7.2880  
7.2700  
7.2581  
7.2288  
7.2114

2.9154  
2.8976  
2.8795  
2.8674  
2.8526  
2.8337  
2.8119  
2.7956  
2.7544  
2.7347  
2.7130  
2.6969  
2.6718  
2.6557  
2.3237  
2.3036  
2.2894  
2.2684  
2.2539  
2.2328  
2.1700  
2.1503  
2.1385  
2.1286  
2.1174  
2.1045  
2.0830

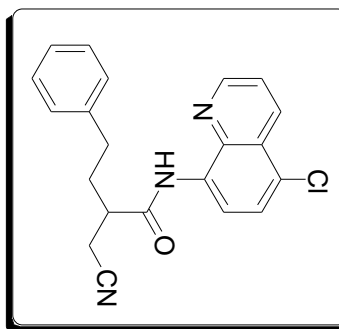

Current Data Parameters  
NAME YXL-9-93-C-20150122  
EXPNO 20  
PROCNO 1

F2 - Acquisition Parameters  
Date\_ 20150122  
Time 19.22  
INSTRUM spect  
PROBHD 5 mm PABBO BB-  
PULPROG zgpg30  
TD 65536  
SOLVENT CDC13  
NS 250  
DS 4  
SWH 24038.461 Hz  
FIDRES 0.366798 Hz  
AQ 1.3631988 sec  
RG 209.25  
DW 20.800 usec  
DE 6.50 usec  
TE 299.7 K  
D1 2.00000000 sec  
D11 0.03000000 sec  
TD0 1

==== CHANNEL f1 =====  
NUC1 13C  
P1 10.59 usec  
PLW1 50.00299835 W  
SFO1 100.6228293 MHz

==== CHANNEL f2 =====  
CPDPRG2 waltz16  
NUC2 1H  
PCPD2 90.00 usec  
PLW2 13.00199986 W  
PLW12 0.35303000 W  
PLW13 0.28595001 W  
SFO2 400.1316005 MHz

F2 - Processing parameters  
SI 32768  
SF 100.6127547 MHz  
WDW EM  
SSB 0  
LB 1.00 Hz  
GB 0  
PC 1.40

170.50  
149.00  
140.21  
139.08  
133.68  
133.13  
128.84  
128.59  
127.30  
126.59  
126.14  
125.30  
122.70  
118.03  
117.00

44.07  
34.03  
33.00  
20.53

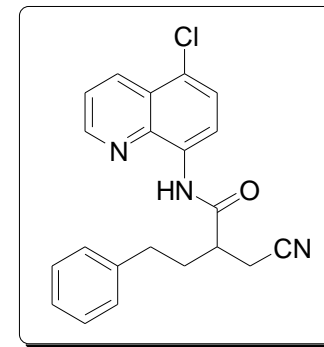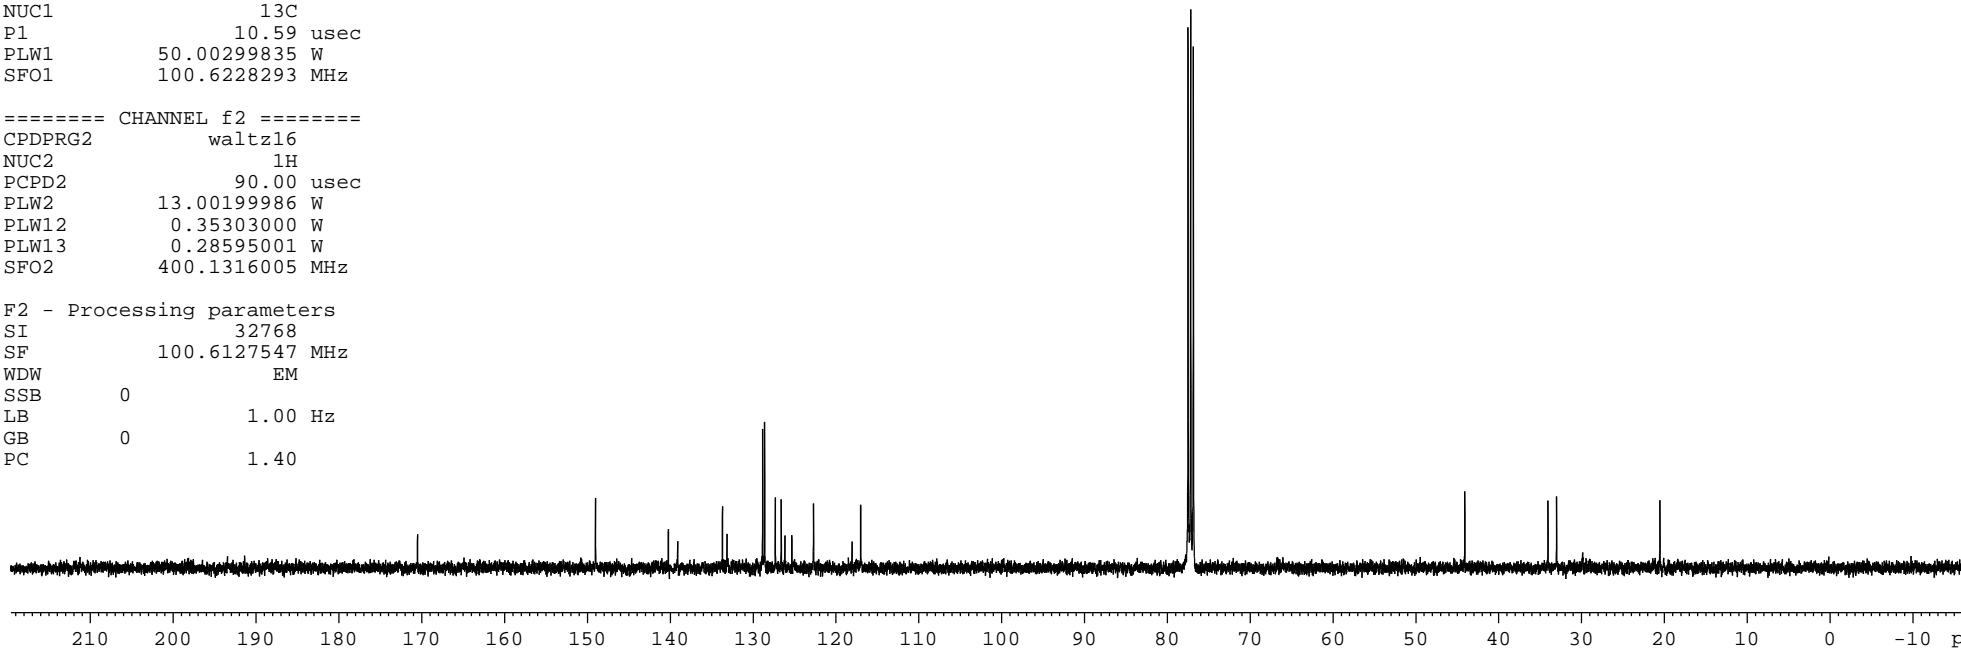

Current Data Parameters  
 NAME 6F-H  
 EXPNO 10  
 PROCNO 1

F2 - Acquisition Parameters

Date\_ 20150119  
 Time 21.52  
 INSTRUM spect  
 PROBHD 5 mm PABBO BB/  
 PULPROG zg30  
 TD 65536  
 SOLVENT CDCl3  
 NS 16  
 DS 2  
 SWH 8012.820 Hz  
 FIDRES 0.122266 Hz  
 AQ 4.0894966 sec  
 RG 112.9  
 DW 62.400 usec  
 DE 6.50 usec  
 TE 298.0 K  
 D1 1.00000000 sec  
 TD0 1

==== CHANNEL f1 =====  
 SFO1 400.1324710 MHz  
 NUC1 1H  
 P1 8.78 usec  
 PLW1 19.00000000 W

F2 - Processing parameters

SI 65536  
 SF 400.1300124 MHz  
 WDW EM  
 SSB 0  
 LB 0.30 Hz  
 GB 0  
 PC 1.00

9.894  
 8.877  
 8.870  
 8.867  
 8.738  
 8.717  
 8.604  
 8.583  
 7.634  
 7.611  
 7.599  
 7.589  
 7.302  
 7.282  
 7.264  
 7.258  
 7.215  
 7.197

4.870  
 4.845  
 4.822  
 4.605  
 4.593  
 4.579  
 4.566  
 2.940  
 2.927  
 2.917  
 2.906  
 2.894  
 2.884  
 2.869  
 2.853  
 2.845  
 2.832  
 2.818  
 2.811  
 2.796  
 2.757  
 2.737  
 2.718  
 2.702  
 2.682  
 2.277  
 2.255  
 2.241  
 2.229  
 2.219  
 2.206  
 2.183  
 2.041  
 2.019  
 2.006  
 1.985  
 1.972  
 1.953

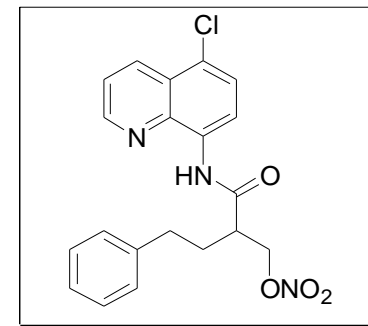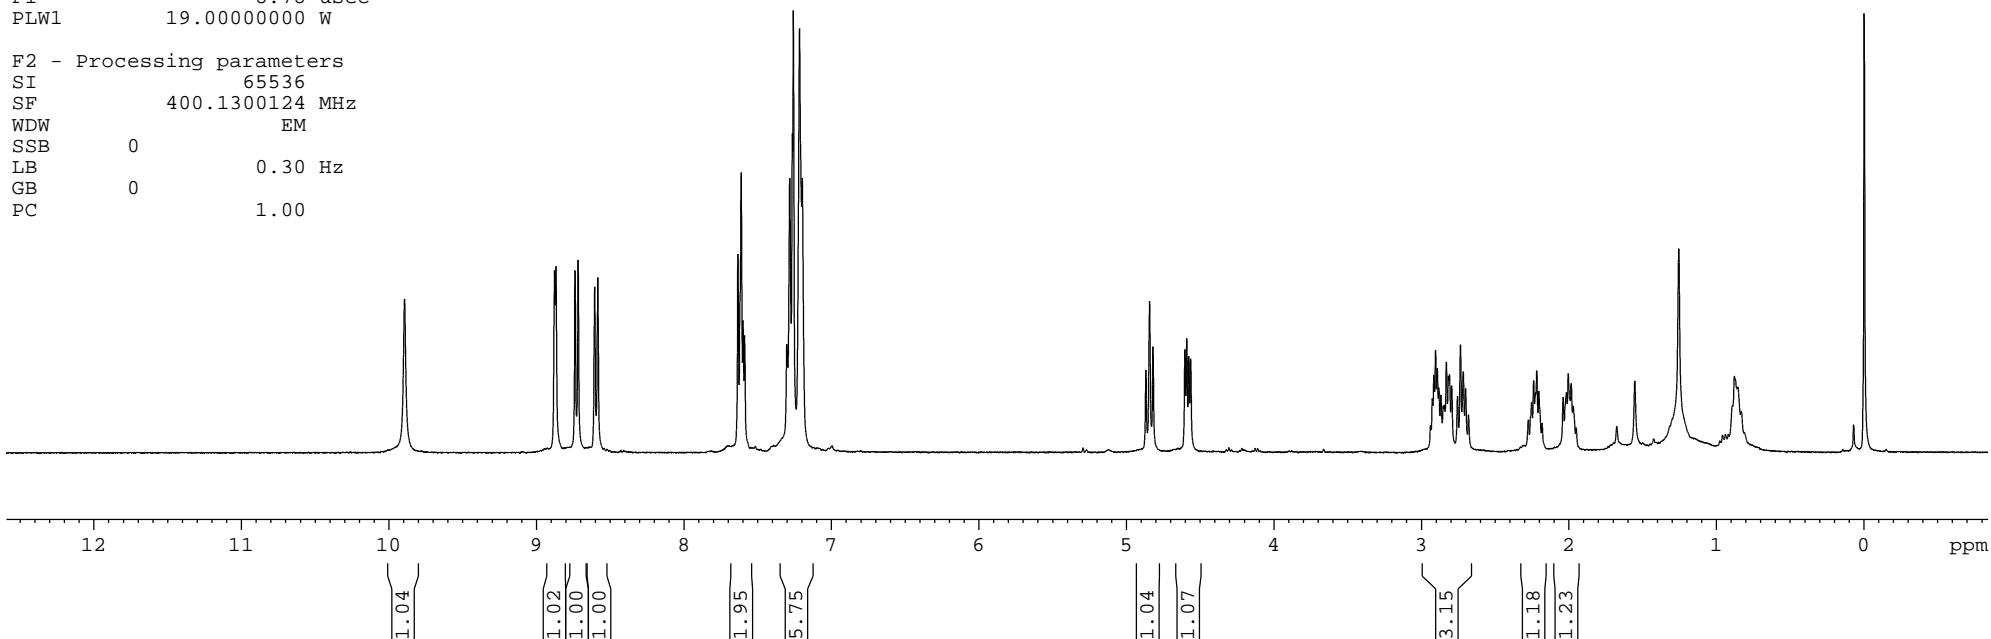

Current Data Parameters  
NAME YXL-8-81-3-C-150119  
EXPNO 11  
PROCNO 1

F2 - Acquisition Parameters  
Date\_ 20150121  
Time 3.46  
INSTRUM spect  
PROBHD 5 mm PABBO BB/  
PULPROG zgpg30  
TD 65536  
SOLVENT CDCl3  
NS 750  
DS 4  
SWH 24038.461 Hz  
FIDRES 0.366798 Hz  
AQ 1.3631488 sec  
RG 202.1  
DW 20.800 usec  
DE 6.50 usec  
TE 298.0 K  
D1 2.00000000 sec  
D11 0.03000000 sec  
TD0 1

=====  
SFO1 100.6228293 MHz  
NUC1 13C  
P1 9.85 usec  
PLW1 65.00000000 W

=====  
SFO2 400.1316005 MHz  
NUC2 1H  
CPDPRG[2] waltz16  
PCPD2 90.00 usec  
PLW2 19.00000000 W  
PLW12 0.18082000 W  
PLW13 0.14647000 W

F2 - Processing parameters  
SI 32768  
SF 100.6127560 MHz  
WDW EM  
SSB 0  
LB 1.00 Hz  
GB 0  
PC 1.40

170.17

148.98  
140.40  
139.06  
133.63  
133.25  
128.80  
128.58  
127.28  
126.55  
126.12  
125.18  
122.65  
116.94

77.47  
77.15  
76.83  
73.34

45.53

33.12  
31.10

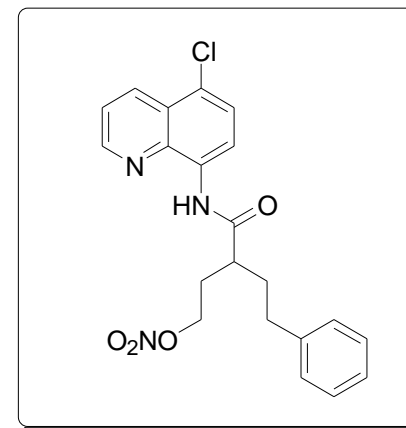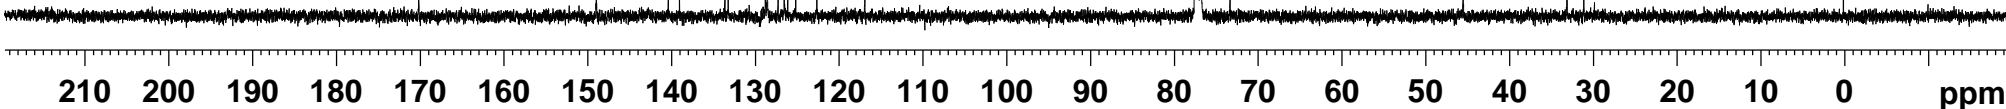

9.9068  
 8.8766  
 8.8731  
 8.8662  
 8.8626  
 8.7748  
 8.7538  
 8.6079  
 8.6043  
 8.5866  
 8.5830  
 8.0340  
 7.6354  
 7.6148  
 7.6059  
 7.5951  
 7.5845  
 7.2952  
 7.2752  
 7.2589  
 7.2159  
 7.1975

4.4944  
 4.4673  
 4.4454  
 4.4354  
 4.4225  
 4.4080  
 4.3954  
 2.9060  
 2.8949  
 2.8834  
 2.8715  
 2.8610  
 2.8488  
 2.8405  
 2.8317  
 2.8186  
 2.8056  
 2.7969  
 2.7826  
 2.7489  
 2.7279  
 2.7090  
 2.6933  
 2.2400  
 2.2317  
 2.2180  
 2.2063  
 2.1972  
 2.1833  
 2.1749  
 2.1604  
 2.0446  
 1.9896  
 1.9770  
 1.9717  
 1.9669  
 1.9550  
 1.9490  
 1.9432  
 1.9367  
 1.9249  
 1.9202  
 1.9148  
 1.5601

Current Data Parameters  
 NAME YXL-9-61-H-20150115  
 EXPNO 10  
 PROCNO 1

F2 - Acquisition Parameters  
 Date\_ 20150115  
 Time 16.20  
 INSTRUM spect  
 PROBHD 5 mm PABBO BB-  
 PULPROG zg30  
 TD 65536  
 SOLVENT CDCl3  
 NS 16  
 DS 2  
 SWH 8223.685 Hz  
 FIDRES 0.125483 Hz  
 AQ 3.9846387 sec  
 RG 209.25  
 DW 60.800 usec  
 DE 6.50 usec  
 TE 297.6 K  
 D1 1.00000000 sec  
 TD0 1

==== CHANNEL f1 =====  
 NUC1 1H  
 P1 14.83 usec  
 PLW1 13.00199986 W  
 SFO1 400.1324710 MHz

F2 - Processing parameters  
 SI 65536  
 SF 400.1300105 MHz  
 WDW EM  
 SSB 0  
 LB 0.30 Hz  
 GB 0  
 PC 1.00

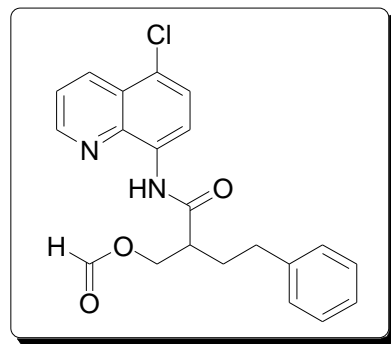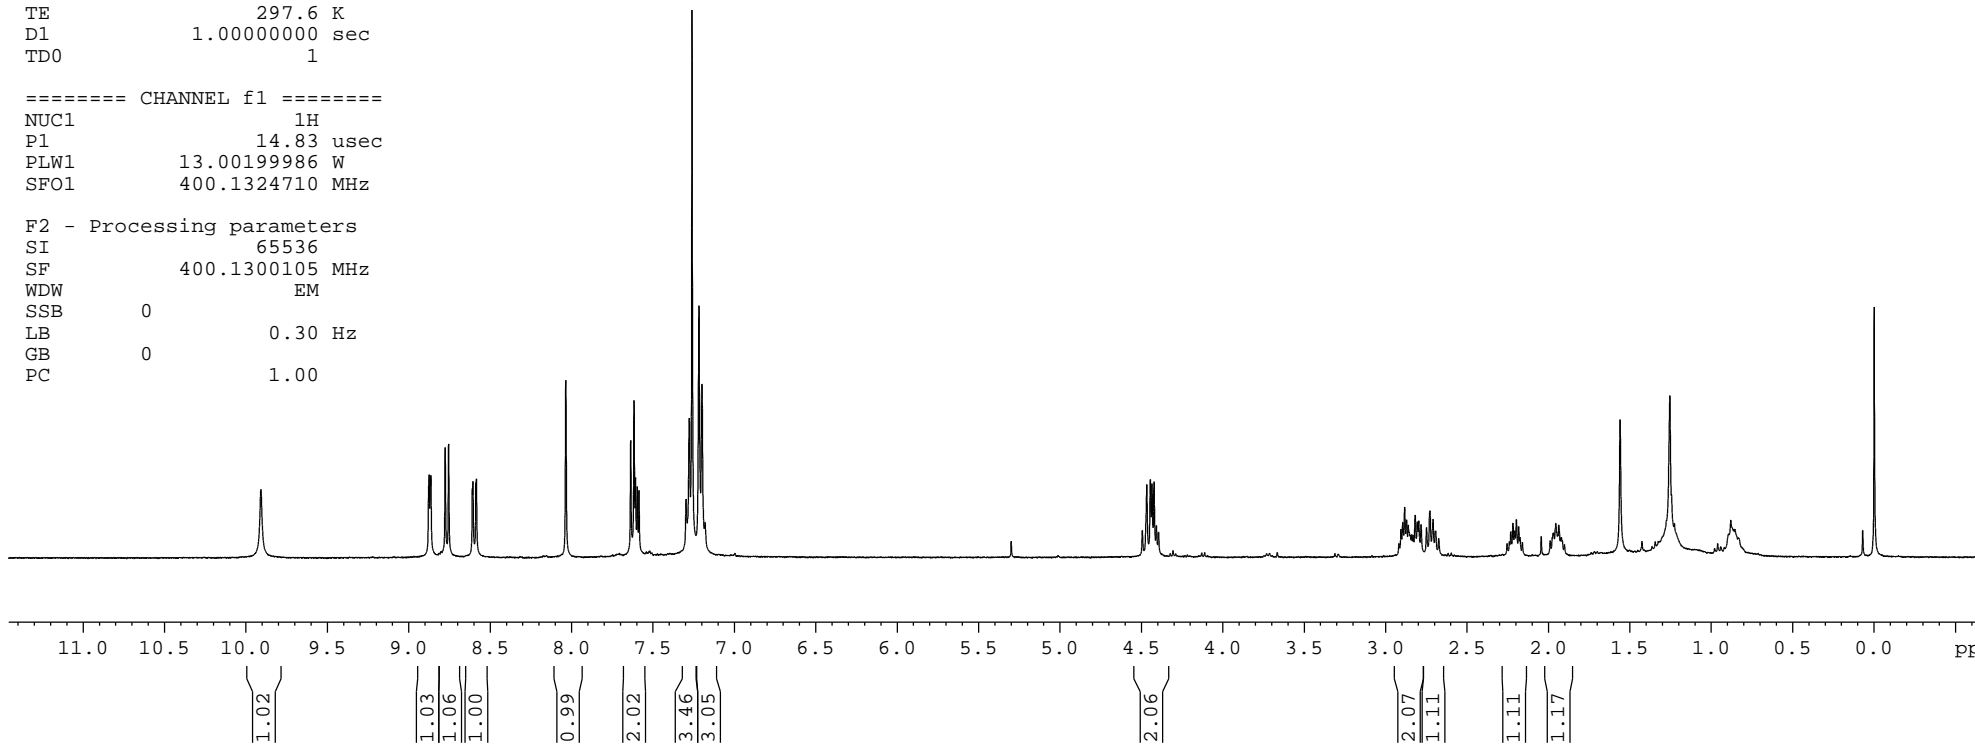

Current Data Parameters  
NAME YXL-9-99-1-C-20150123  
EXPNO 22  
PROCNO 1

F2 - Acquisition Parameters  
Date\_ 20150123  
Time 13.32  
INSTRUM spect  
PROBHD 5 mm PABBO BB-  
PULPROG zgpg30  
TD 65536  
SOLVENT CDCl3  
NS 480  
DS 4  
SWH 24038.461 Hz  
FIDRES 0.366798 Hz  
AQ 1.3631988 sec  
RG 209.25  
DW 20.800 usec  
DE 6.50 usec  
TE 300.0 K  
D1 2.00000000 sec  
D11 0.03000000 sec  
TD0 1

==== CHANNEL f1 =====  
NUC1 13C  
P1 10.59 usec  
PLW1 50.00299835 W  
SFO1 100.6228293 MHz

==== CHANNEL f2 =====  
CPDPRG2 waltz16  
NUC2 1H  
PCPD2 90.00 usec  
PLW2 13.00199986 W  
PLW12 0.35303000 W  
PLW13 0.28595001 W  
SFO2 400.1316005 MHz

F2 - Processing parameters  
SI 32768  
SF 100.6127544 MHz  
WDW EM  
SSB 0  
LB 1.00 Hz  
GB 0  
PC 1.40

171.27  
160.73  
148.91  
140.86  
139.13  
133.63  
133.53  
128.72  
128.61  
127.36  
126.40  
126.13  
124.91  
122.58  
116.87

77.48  
77.16  
76.84

64.80

47.19

33.31  
30.93

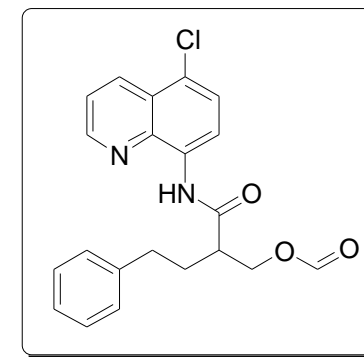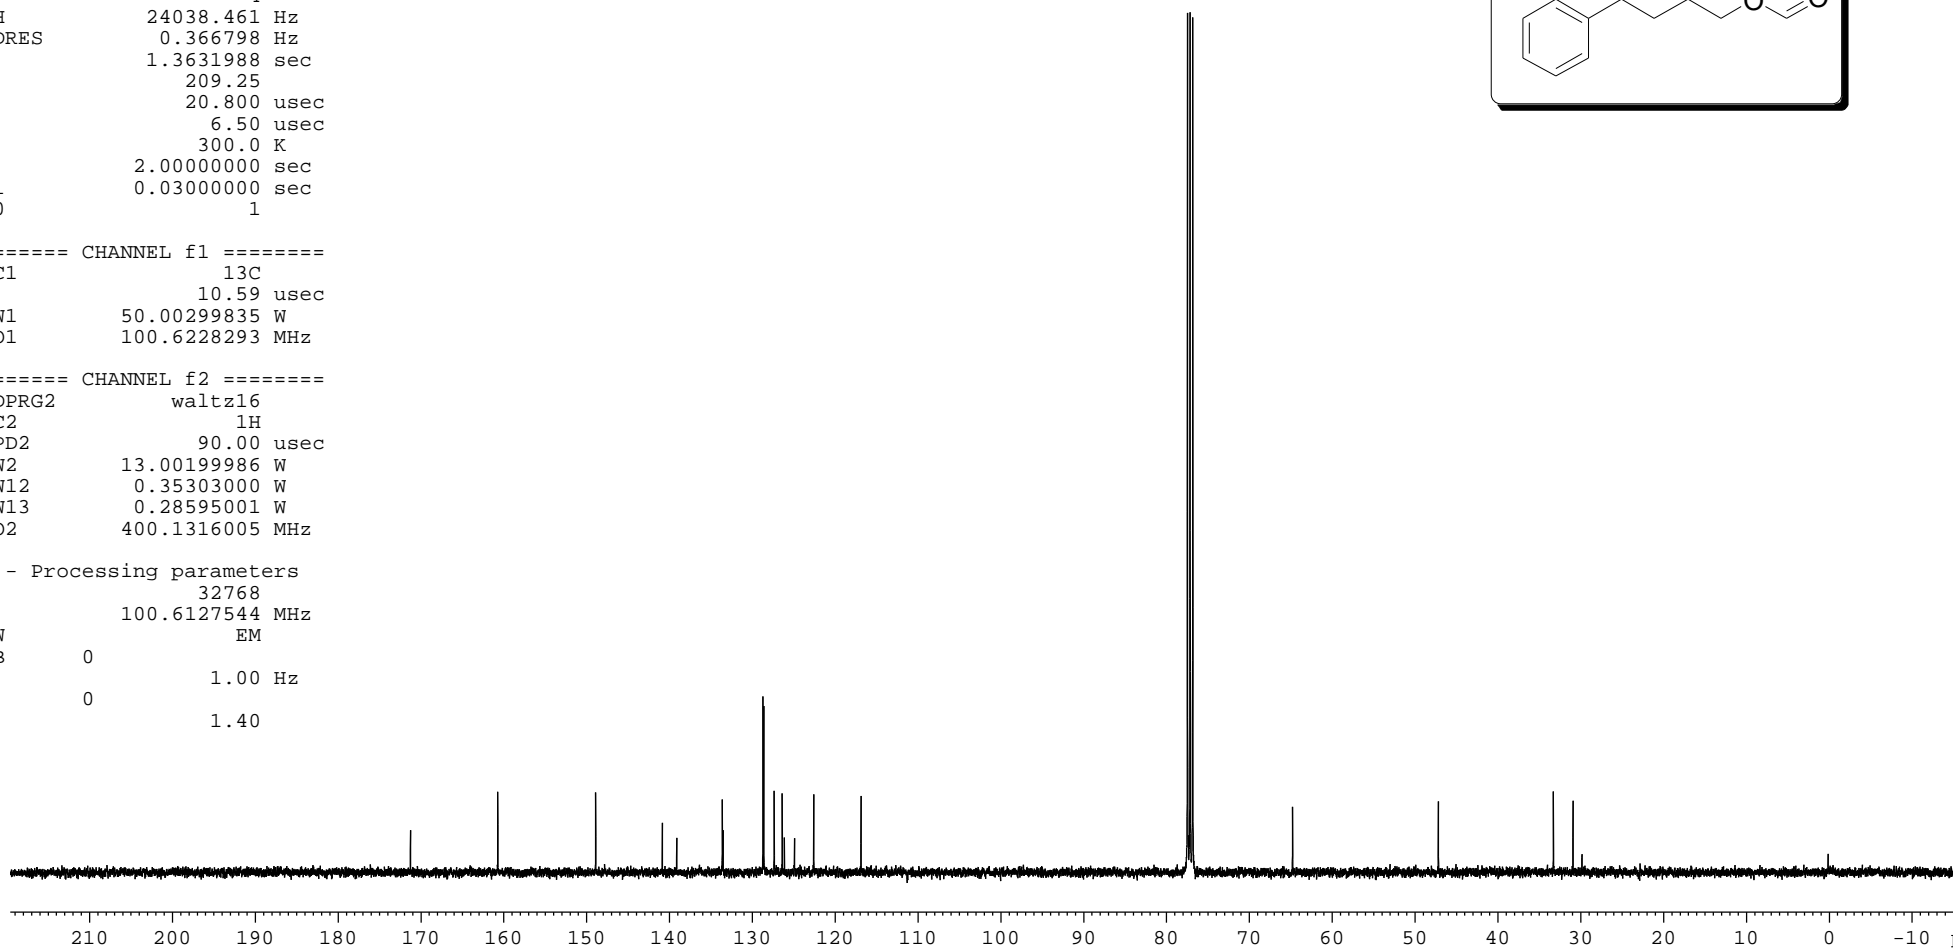

Current Data Parameters  
NAME YXL-9-47-H-20150117  
EXPNO 10  
PROCNO 1

F2 - Acquisition Parameters  
Date\_ 20150117  
Time 20.49  
INSTRUM spect  
PROBHD 5 mm PABBO BB-  
PULPROG zg30  
TD 65536  
SOLVENT CDCl3  
NS 16  
DS 2  
SWH 8223.685 Hz  
FIDRES 0.125483 Hz  
AQ 3.9846387 sec  
RG 115.38  
DW 60.800 usec  
DE 6.50 usec  
TE 297.9 K  
D1 1.00000000 sec  
TD0 1

==== CHANNEL f1 =====  
NUC1 1H  
P1 14.83 usec  
PLW1 13.00199986 W  
SFO1 400.1324710 MHz

F2 - Processing parameters  
SI 65536  
SF 400.1300103 MHz  
WDW EM  
SSB 0  
LB 0.30 Hz  
GB 0  
PC 1.00

9.9100

8.8816  
8.8714  
8.8033  
8.7824  
8.5944  
8.5732  
7.6307  
7.6085  
7.5950  
7.5842  
7.5737  
7.2901  
7.2712  
7.2583  
7.2531  
7.2204  
7.2034  
7.1888  
7.1716

3.0029  
2.9825  
2.9714  
2.9513  
2.7984  
2.7855  
2.7716  
2.7574  
2.7263  
2.7169  
2.7061  
2.6952  
2.6826  
2.6756  
2.6611  
2.2594  
2.2371  
2.2244  
2.2131  
2.2028  
2.1898  
2.1815  
2.1671  
2.1121  
2.0772  
2.0655  
2.0437  
2.0358  
2.0243

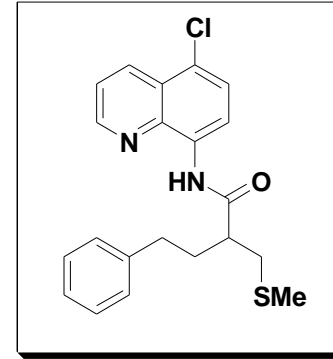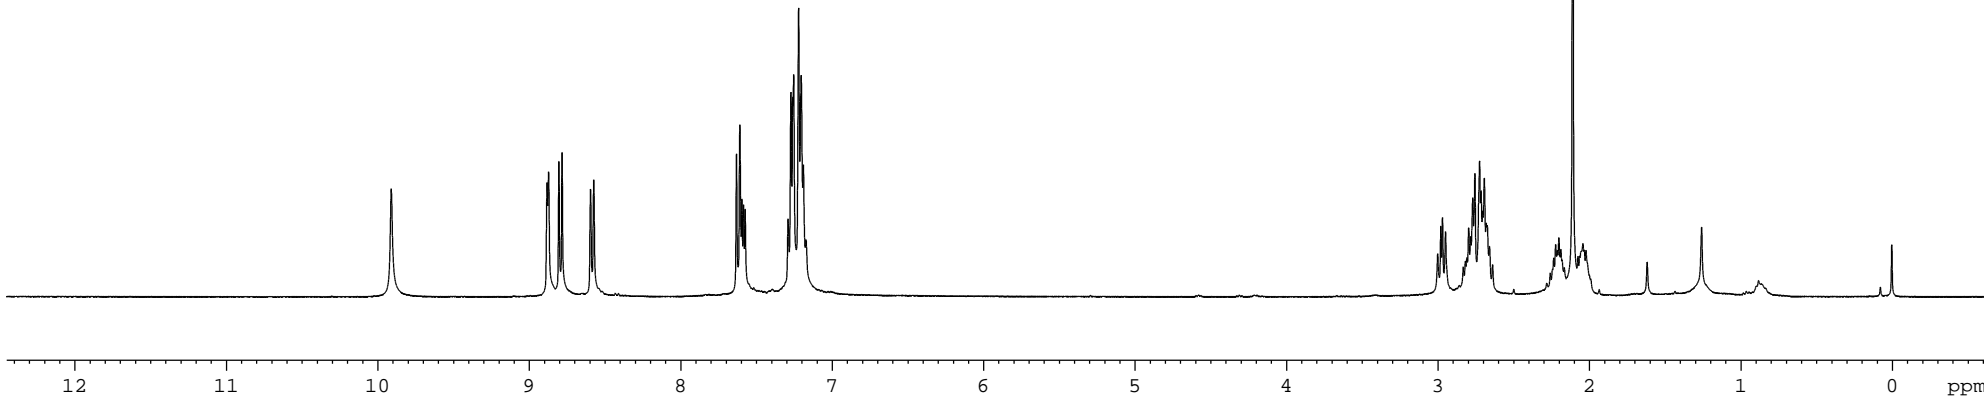

0.97

2.06

1.03

2.03

5.69

1.09

4.18

1.31

2.82

1.15

ppm

Current Data Parameters  
NAME YXL-9-47-C-20150117  
EXPNO 20  
PROCNO 1

F2 - Acquisition Parameters  
Date\_ 20150118  
Time 1.30  
INSTRUM spect  
PROBHD 5 mm PABBO BB-  
PULPROG zgpg30  
TD 65536  
SOLVENT CDCl3  
NS 450  
DS 4  
SWH 24038.461 Hz  
FIDRES 0.366798 Hz  
AQ 1.3631988 sec  
RG 184.16  
DW 20.800 usec  
DE 6.50 usec  
TE 299.0 K  
D1 2.00000000 sec  
D11 0.03000000 sec  
TD0 1

==== CHANNEL f1 =====  
NUC1 13C  
P1 10.59 usec  
PLW1 50.00299835 W  
SFO1 100.6228293 MHz

==== CHANNEL f2 =====  
CPDPRG2 waltz16  
NUC2 1H  
PCPD2 90.00 usec  
PLW2 13.00199986 W  
PLW12 0.35303000 W  
PLW13 0.28595001 W  
SFO2 400.1316005 MHz

F2 - Processing parameters  
SI 32768  
SF 100.6127577 MHz  
WDW EM  
SSB 0  
LB 1.00 Hz  
GB 0  
PC 1.40

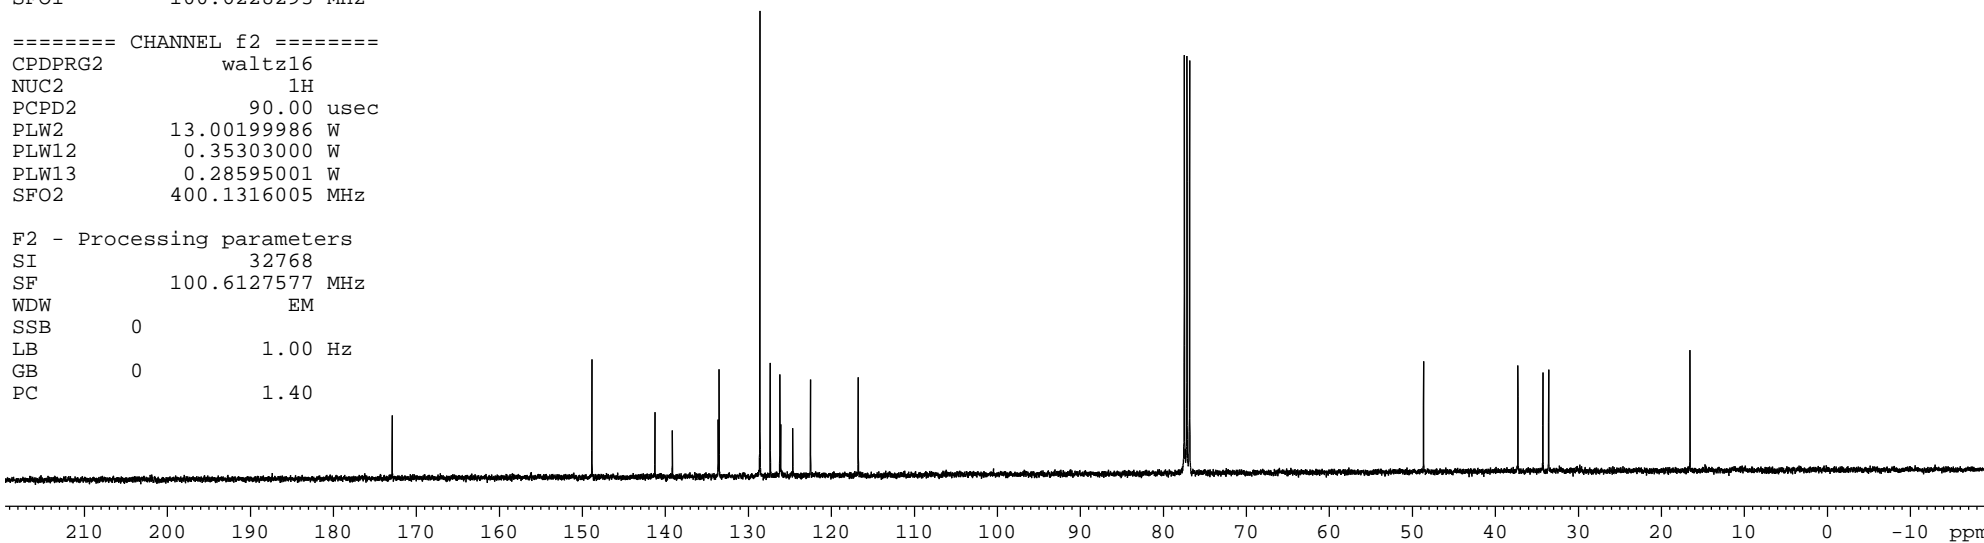

172.91

148.84

141.24

139.16

133.65

133.53

128.60

127.36

126.20

126.09

124.65

122.50

116.76

77.47

77.35

77.15

76.83

48.64

37.28

34.26

33.57

16.54

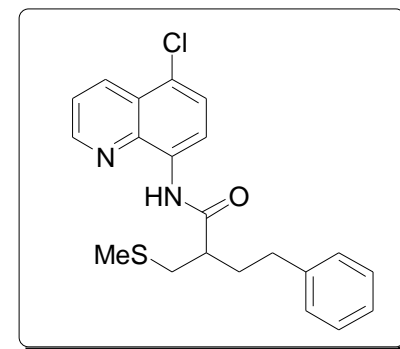



Current Data Parameters  
 NAME YXL-9-78-H-20150121  
 EXPNO 10  
 PROCNO 1

F2 - Acquisition Parameters  
 Date\_ 20150121  
 Time 9.41  
 INSTRUM spect  
 PROBHD 5 mm PABBO BB-  
 PULPROG zg30  
 TD 65536  
 SOLVENT CDCl3  
 NS 16  
 DS 2  
 SWH 8223.685 Hz  
 FIDRES 0.125483 Hz  
 AQ 3.9846387 sec  
 RG 130.81  
 DW 60.800 usec  
 DE 6.50 usec  
 TE 299.0 K  
 D1 1.00000000 sec  
 TD0 1

==== CHANNEL f1 =====  
 NUC1 1H  
 P1 14.83 usec  
 PLW1 13.00199986 W  
 SFO1 400.1324710 MHz

F2 - Processing parameters  
 SI 65536  
 SF 400.1300099 MHz  
 WDW EM  
 SSB 0  
 LB 0.30 Hz  
 GB 0  
 PC 1.00

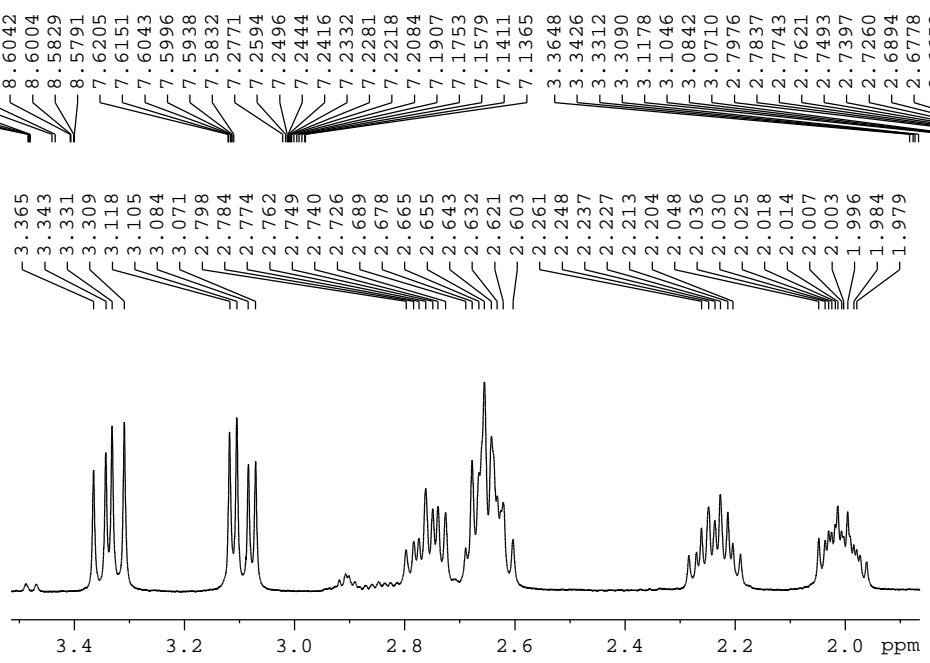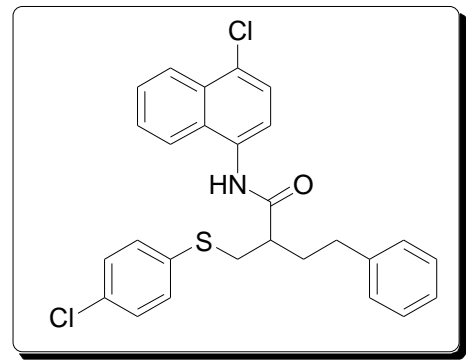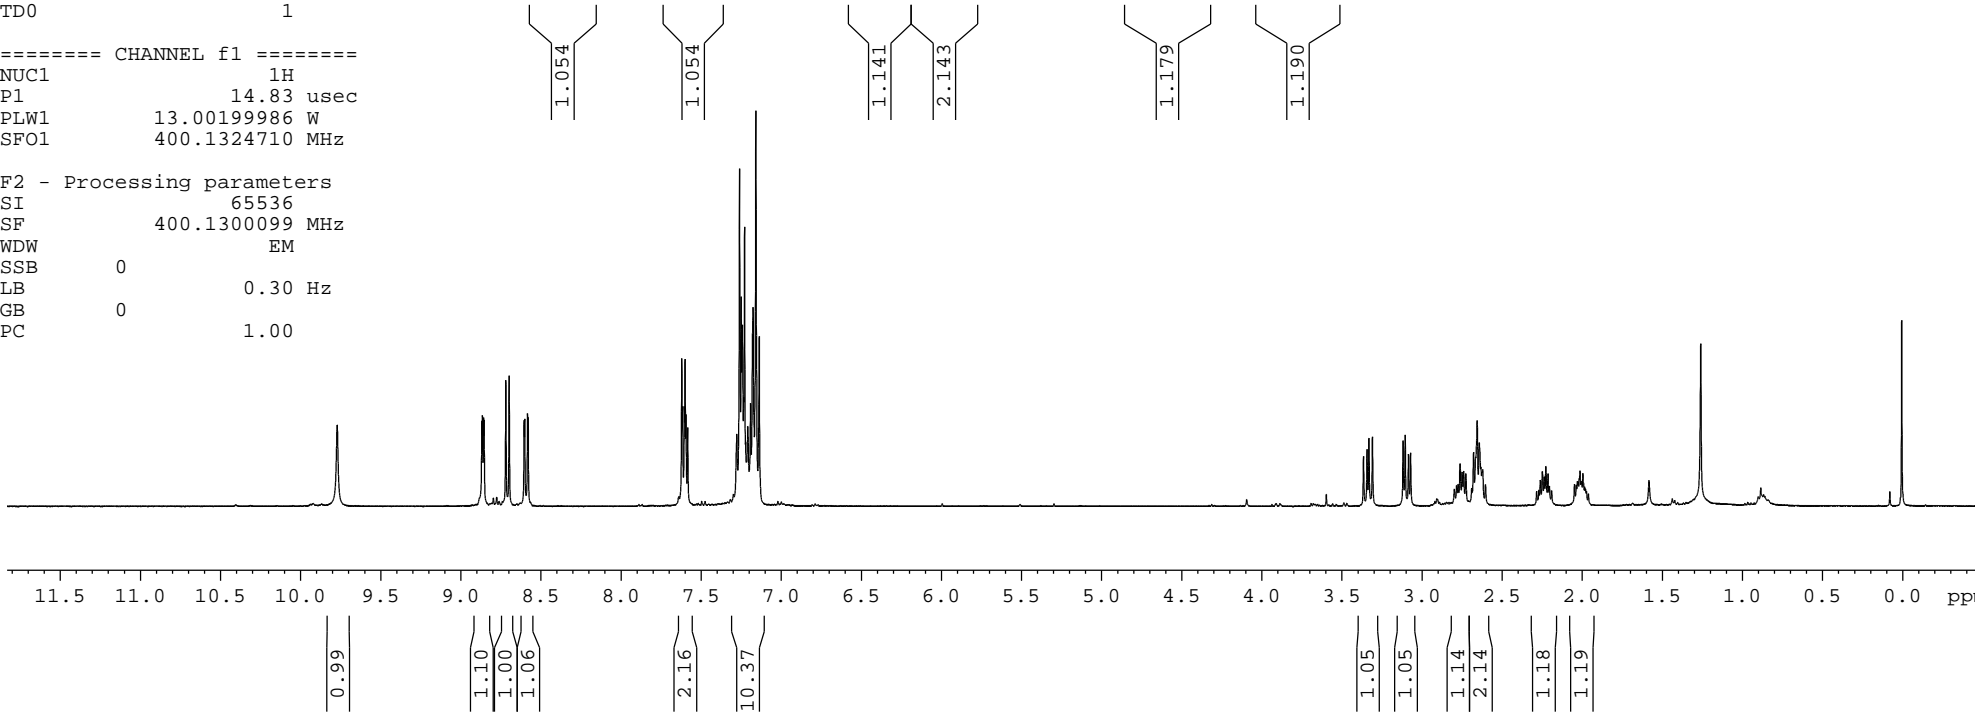

9.7712  
8.8681  
8.8644  
8.8577  
8.8539  
8.7186  
8.6976  
8.6042  
8.6004  
8.5829  
8.5791  
7.6205  
7.6151  
7.6043  
7.5996  
7.5938  
7.5832  
7.2771  
7.2594  
7.2496  
7.2444  
7.2416  
7.2332  
7.2281  
7.2218  
7.2084  
7.1907  
7.1753  
7.1579  
7.1411  
7.1365  
3.3648  
3.3426  
3.3312  
3.3090  
3.1178  
3.1046  
3.0842  
3.0710  
2.7976  
2.7837  
2.7743  
2.7621  
2.7493  
2.7397  
2.7260  
2.6894  
2.6778  
2.6653  
2.6554  
2.6426  
2.6322  
2.6211  
2.6035  
2.2841  
2.2701  
2.2612  
2.2481  
2.2368  
2.2269  
2.2132  
2.2042  
2.1903  
2.0480  
2.0364  
2.0301  
2.0247  
2.0182  
2.0136  
2.0067  
1.9956  
1.9845  
1.9792

3.365  
3.343  
3.331  
3.309  
3.118  
3.105  
3.084  
3.071  
2.798  
2.784  
2.774  
2.762  
2.749  
2.740  
2.726  
2.689  
2.678  
2.665  
2.655  
2.643  
2.632  
2.621  
2.603  
2.261  
2.248  
2.237  
2.227  
2.213  
2.204  
2.048  
2.036  
2.030  
2.025  
2.018  
2.014  
2.007  
2.003  
1.996  
1.984  
1.979

1.054  
1.054  
1.141  
2.143  
1.179  
1.190

0.99  
1.10  
1.00  
1.06  
2.16  
10.37  
1.05  
1.05  
1.14  
2.14  
1.18  
1.19

Current Data Parameters  
NAME YXL-9-78-C-150120  
EXPNO 10  
PROCNO 1

F2 - Acquisition Parameters  
Date\_ 20150121  
Time 3.00  
INSTRUM spect  
PROBHD 5 mm PABBO BB/  
PULPROG zgpg30  
TD 65536  
SOLVENT CDCl3  
NS 750  
DS 4  
SWH 24038.461 Hz  
FIDRES 0.366798 Hz  
AQ 1.3631488 sec  
RG 202.1  
DW 20.800 usec  
DE 6.50 usec  
TE 298.0 K  
D1 2.00000000 sec  
D11 0.03000000 sec  
TD0 1

==== CHANNEL f1 =====  
SFO1 100.6228293 MHz  
NUC1 13C  
P1 9.85 usec  
PLW1 65.00000000 W

==== CHANNEL f2 =====  
SFO2 400.1316005 MHz  
NUC2 1H  
CPDPRG[2] waltz16  
PCPD2 90.00 usec  
PLW2 19.00000000 W  
PLW12 0.18082000 W  
PLW13 0.14647000 W

F2 - Processing parameters

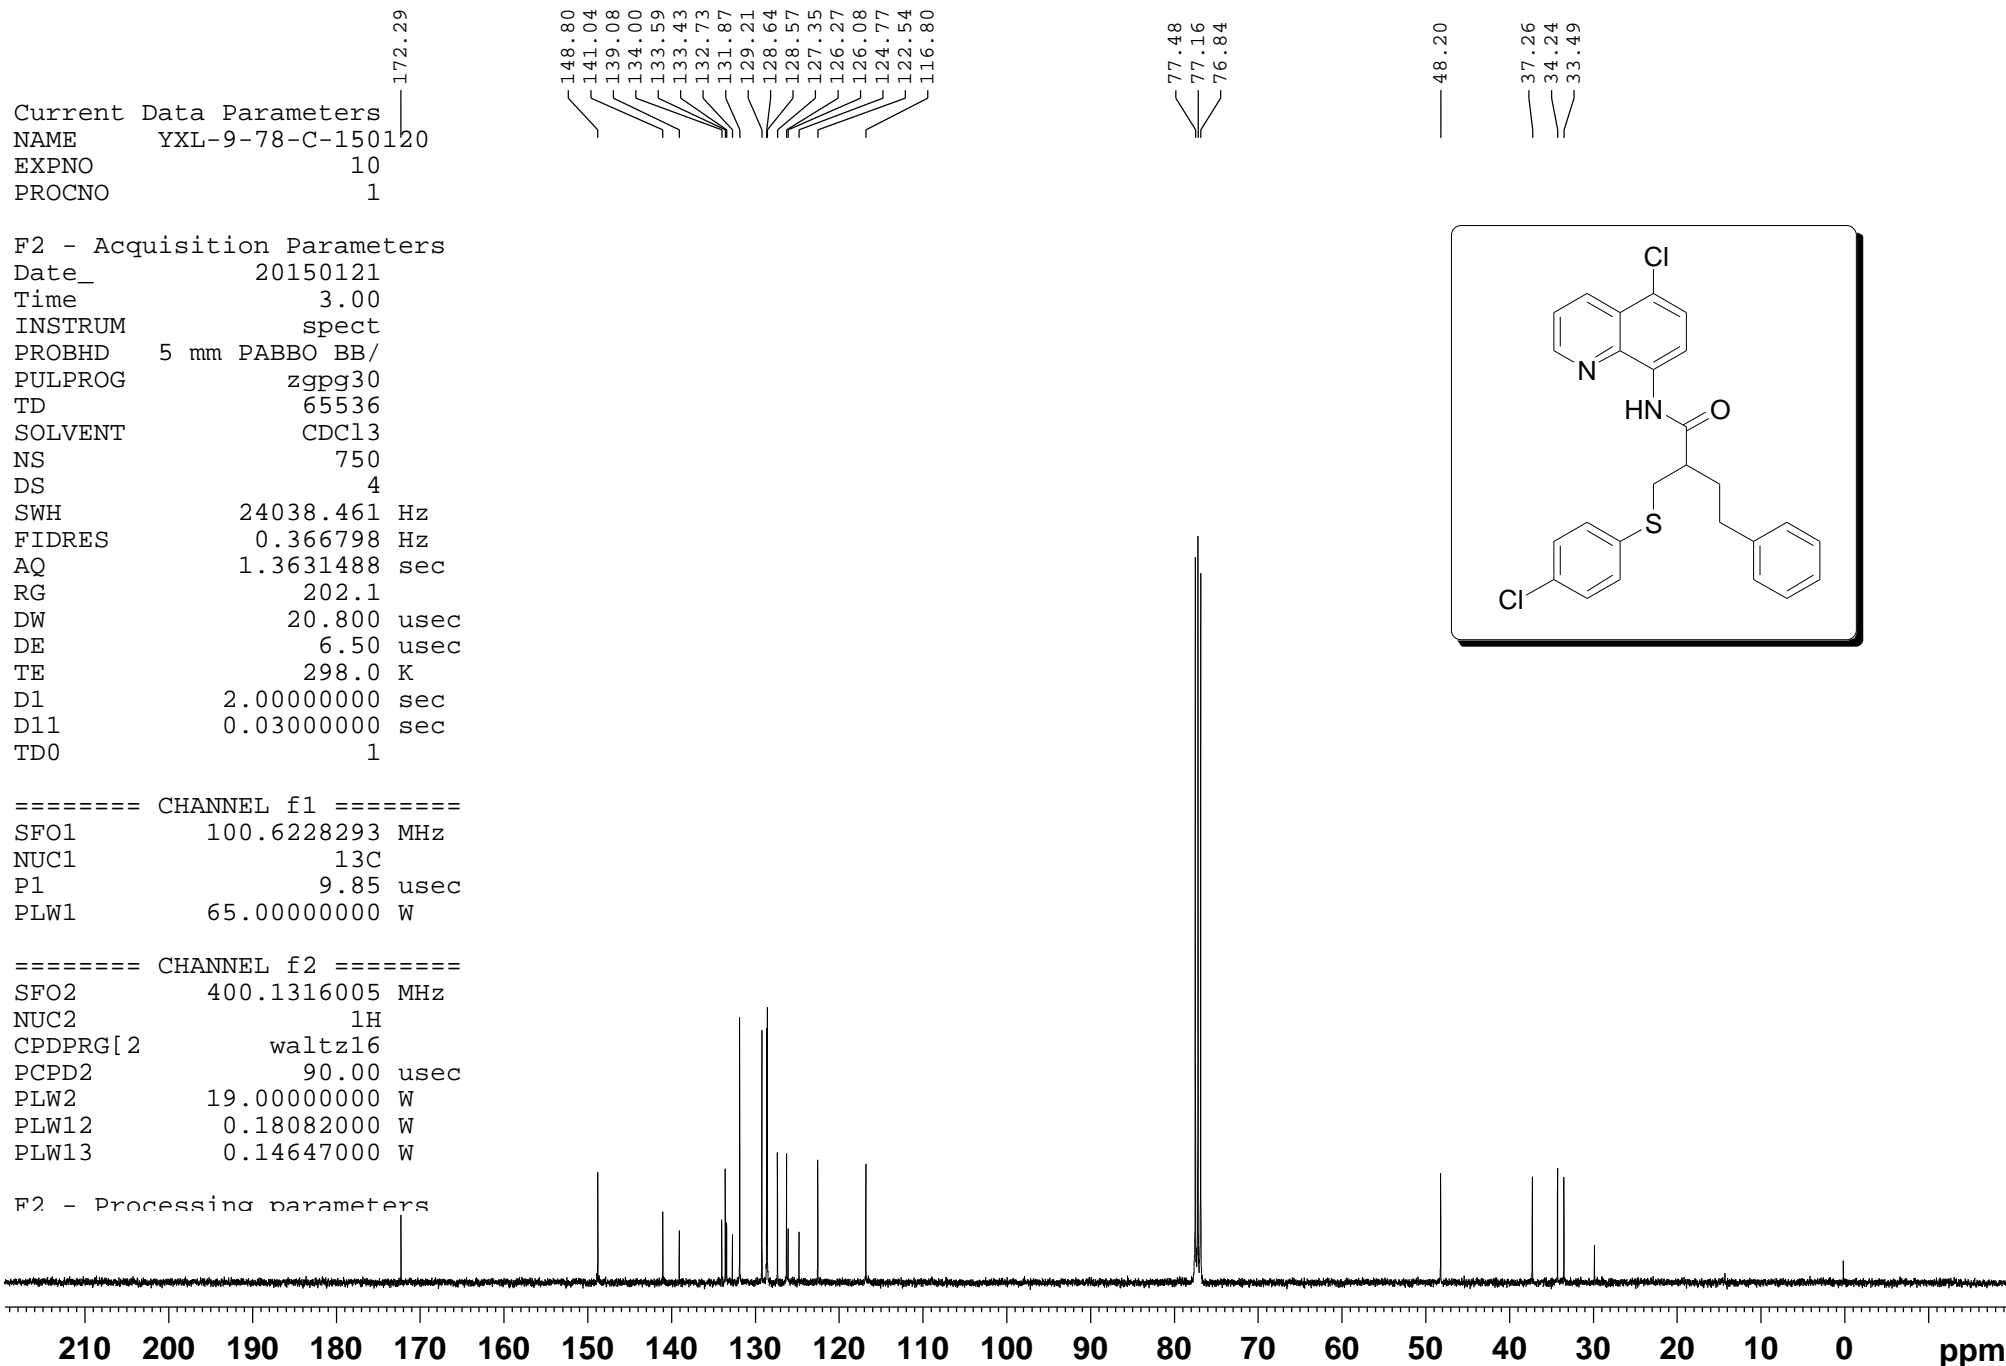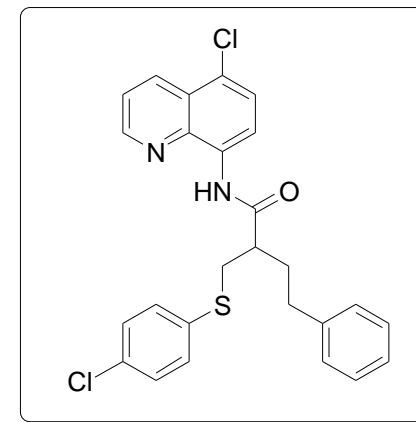

Current Data Parameters  
 NAME YXL-10-153-H-20151105  
 EXPNO 10  
 PROCNO 1

F2 - Acquisition Parameters  
 Date\_ 20151105  
 Time 22.38  
 INSTRUM spect  
 PROBHD 5 mm PABBO BB-  
 PULPROG zg30  
 TD 65536  
 SOLVENT CDCl3  
 NS 16  
 DS 2  
 SWH 8223.685 Hz  
 FIDRES 0.125483 Hz  
 AQ 3.9846387 sec  
 RG 85  
 DW 60.800 usec  
 DE 6.50 usec  
 TE 296.5 K  
 D1 1.00000000 sec  
 TD0 1

==== CHANNEL f1 =====  
 NUC1 1H  
 P1 14.80 usec  
 PLW1 13.00199986 W  
 SFO1 400.1324710 MHz

F2 - Processing parameters  
 SI 65536  
 SF 400.1300084 MHz  
 WDW EM  
 SSB 0  
 LB 0.30 Hz  
 GB 0  
 PC 1.00

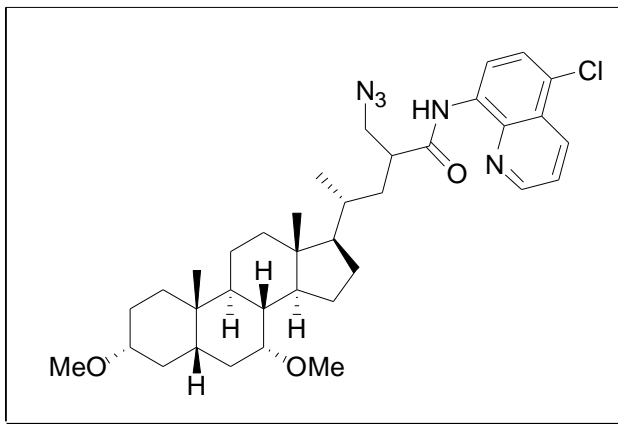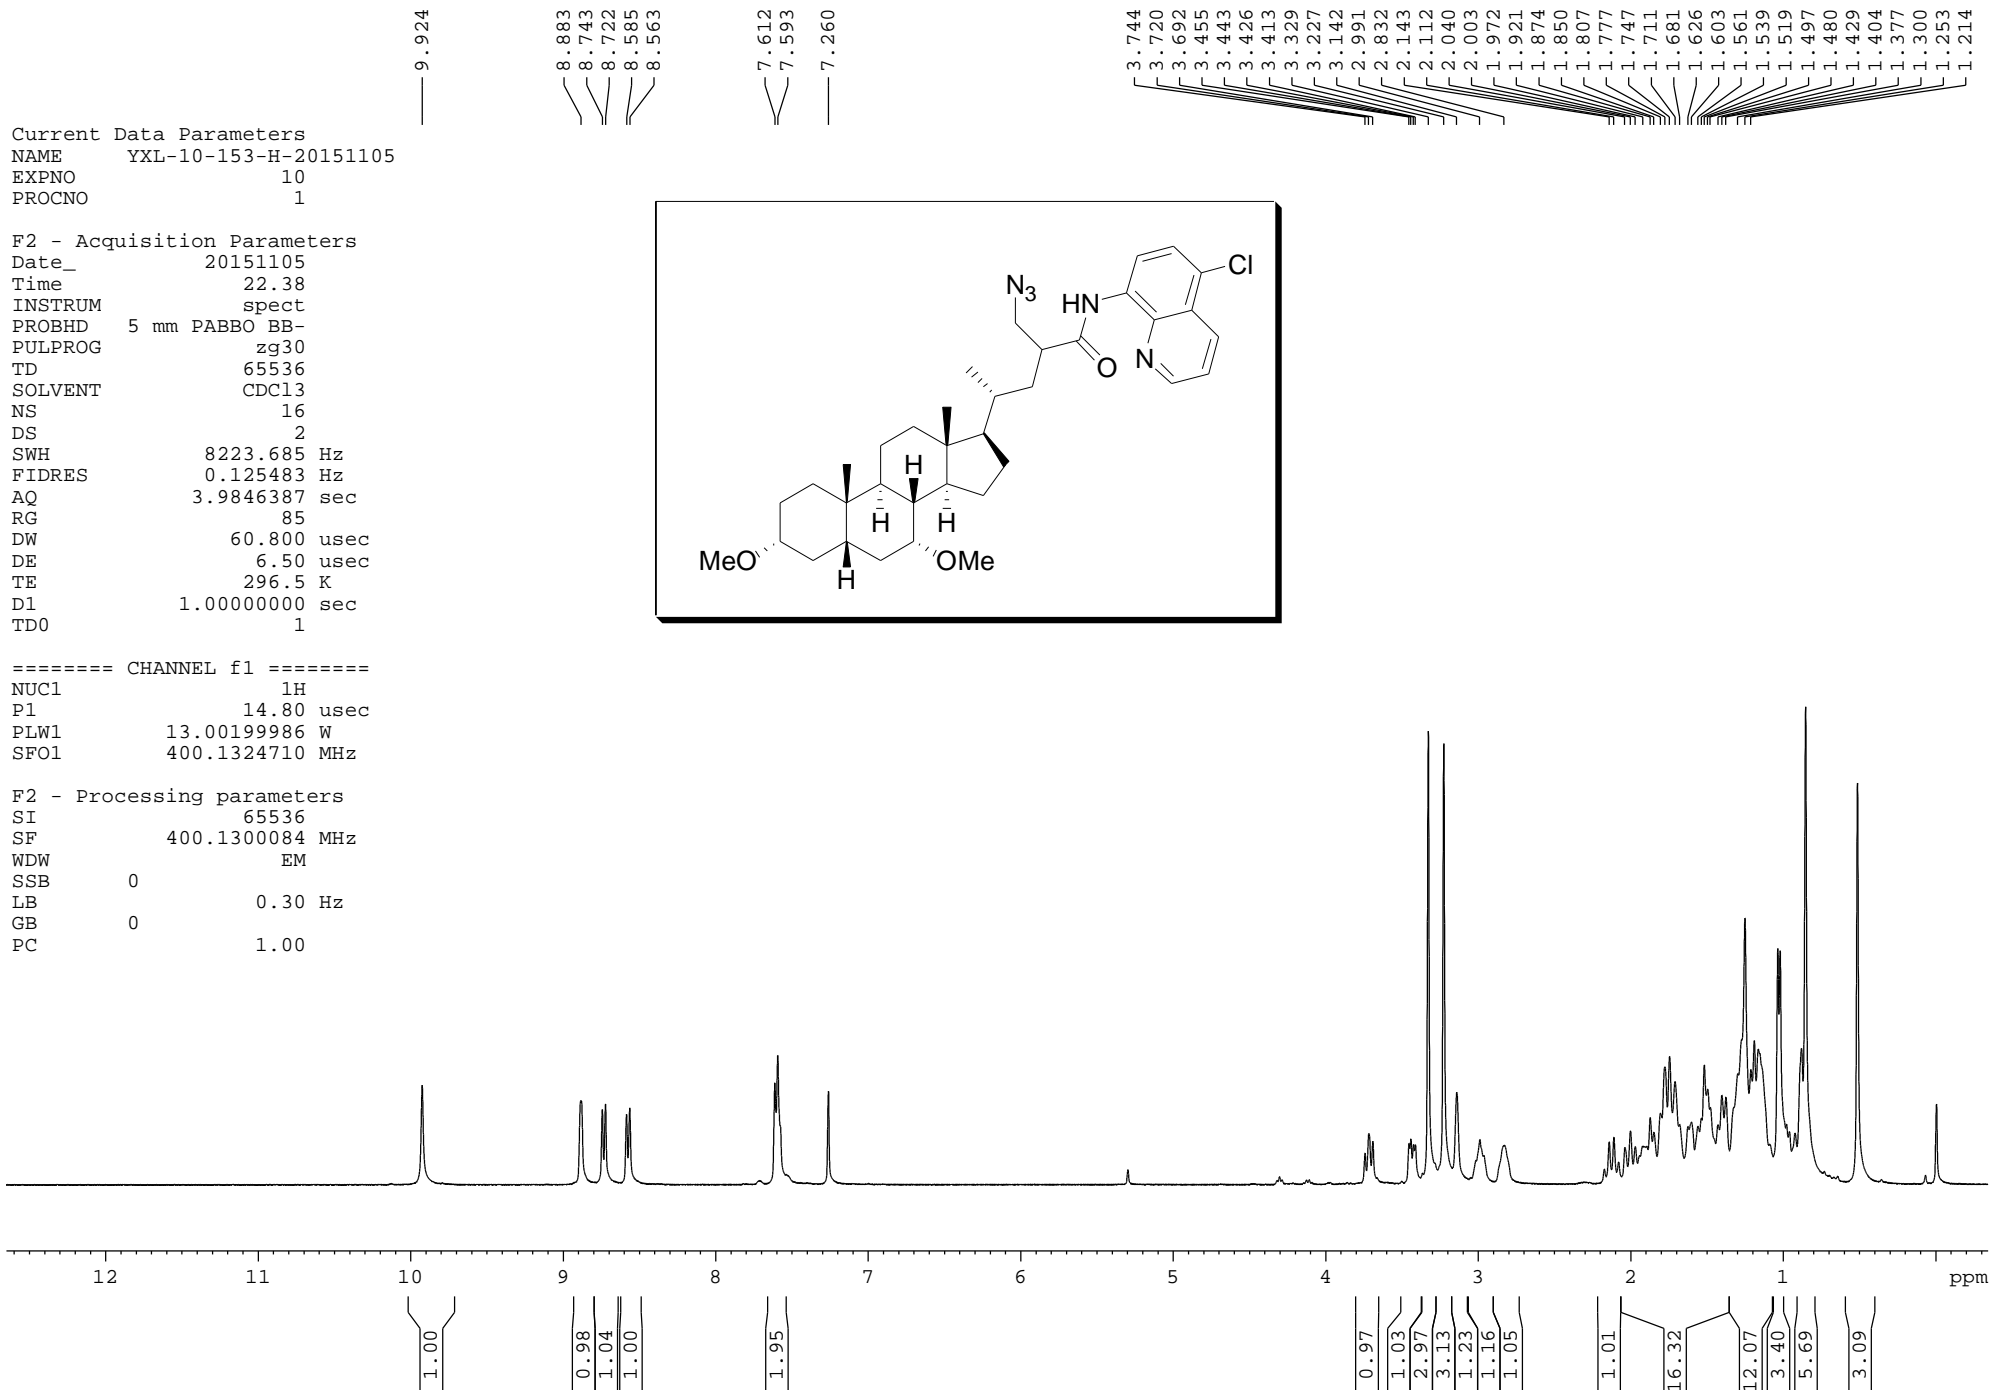

Current Data Parameters  
 NAME YXL-10-153-C-20151105  
 EXPNO 10  
 PROCNO 1

F2 - Acquisition Parameters  
 Date\_ 20151106  
 Time 6.29  
 INSTRUM spect  
 PROBHD 5 mm PABBO BB-  
 PULPROG zgpg30  
 TD 65536  
 SOLVENT CDCl3  
 NS 450  
 DS 4  
 SWH 24038.461 Hz  
 FIDRES 0.366798 Hz  
 AQ 1.3631988 sec  
 RG 209.25  
 DW 20.800 usec  
 DE 6.50 usec  
 TE 297.1 K  
 D1 2.00000000 sec  
 D11 0.03000000 sec  
 TD0 1

==== CHANNEL f1 =====  
 NUC1 13C  
 P1 10.90 usec  
 PLW1 50.00299835 W  
 SFO1 100.6228293 MHz

==== CHANNEL f2 =====  
 CPDPRG2 waltz16  
 NUC2 1H  
 PCPD2 90.00 usec  
 PLW2 13.00199986 W  
 PLW12 0.38069001 W  
 PLW13 0.30836001 W  
 SFO2 400.1316005 MHz

F2 - Processing parameters  
 SI 32768  
 SF 100.6127551 MHz  
 WDW EM  
 SSB 0  
 LB 1.00 Hz  
 GB 0  
 PC 1.40

— 172.00  
 — 149.00  
 — 139.16  
 — 133.56  
 — 133.52  
 — 127.33  
 — 126.09  
 — 124.74  
 — 122.56  
 — 116.88

80.78  
 77.48  
 77.42  
 77.16  
 76.84  
 56.54  
 56.00  
 55.52  
 54.71  
 50.32  
 46.35  
 42.64  
 42.03  
 39.71  
 39.53  
 36.91  
 35.43  
 35.35  
 34.76  
 34.37  
 33.76  
 29.84  
 28.40  
 28.03  
 26.85  
 23.77  
 23.05  
 20.92  
 18.92  
 14.26  
 11.78

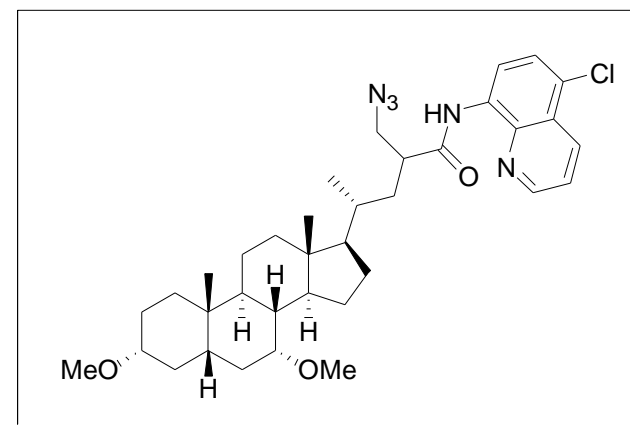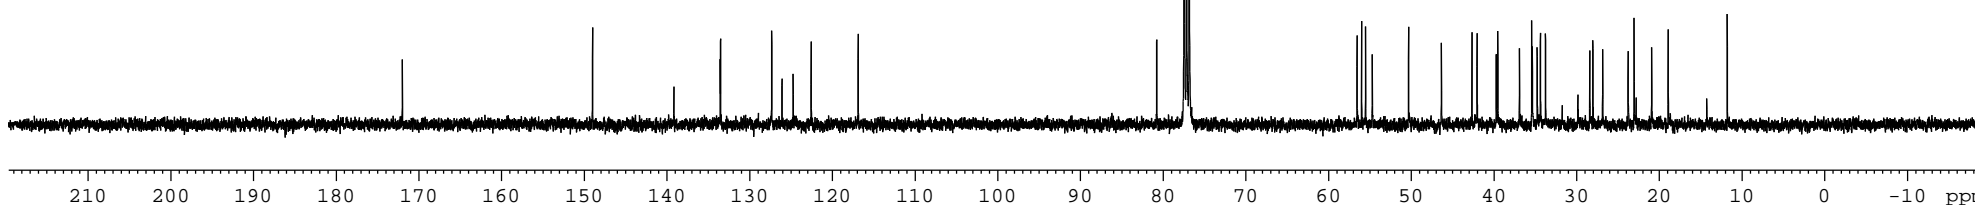

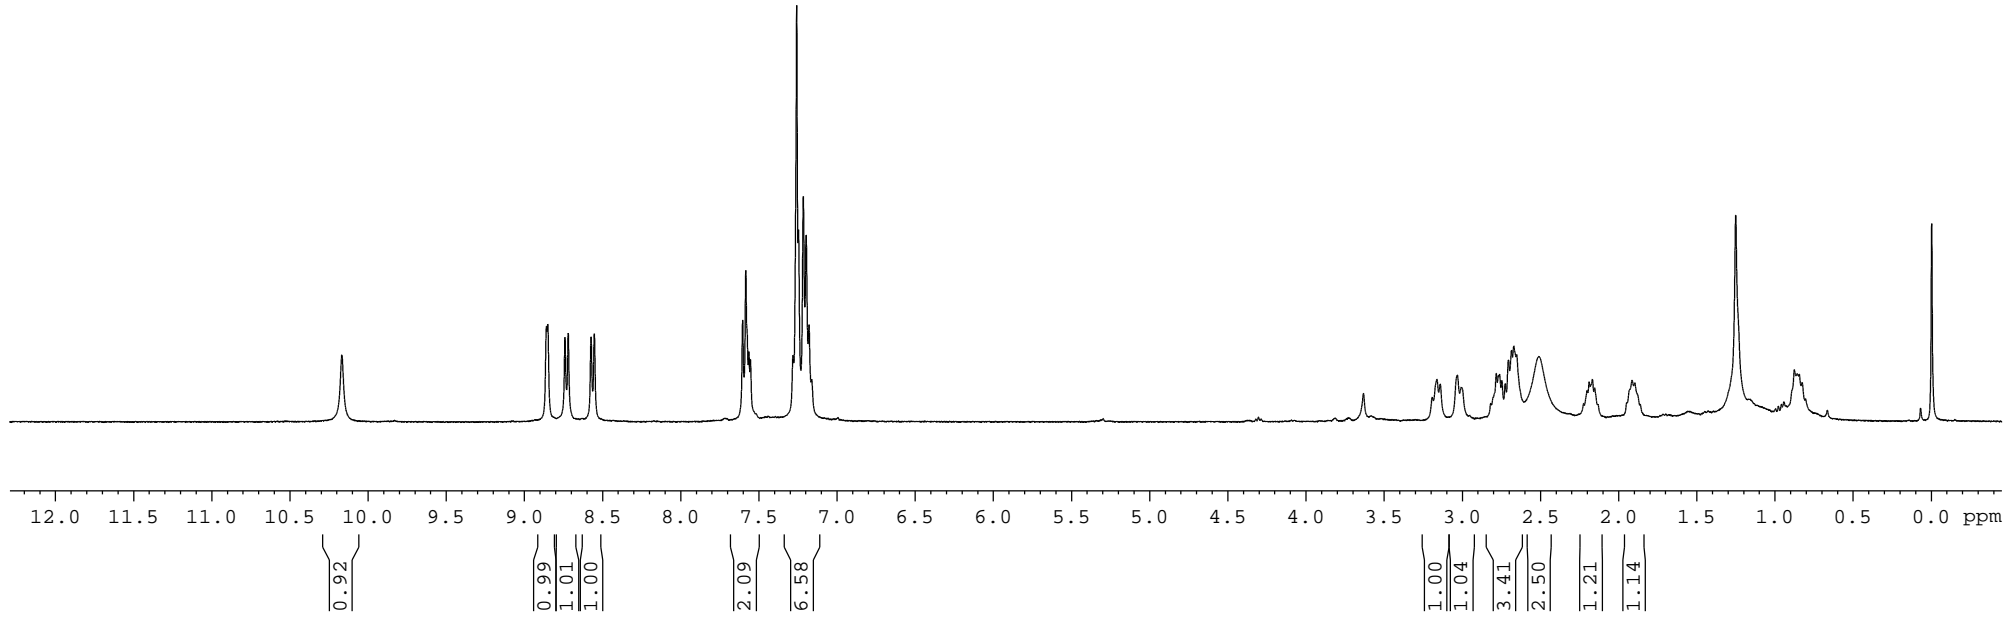

— 10.1699

8.8610  
8.8526  
8.7423  
8.7214  
8.5752  
8.5543

7.6056  
7.5853  
7.5657  
7.5554  
7.2833  
7.2596  
7.2480  
7.2171  
7.1990  
7.1808

3.1633  
3.1419  
3.0323  
3.0082  
2.7832  
2.7695  
2.7619  
2.7480  
2.7259  
2.7062  
2.6858  
2.6719  
2.6526  
2.5088  
2.2031  
2.1892  
2.1684  
2.1534  
1.9145  
1.8970

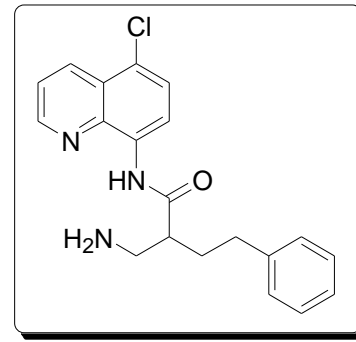

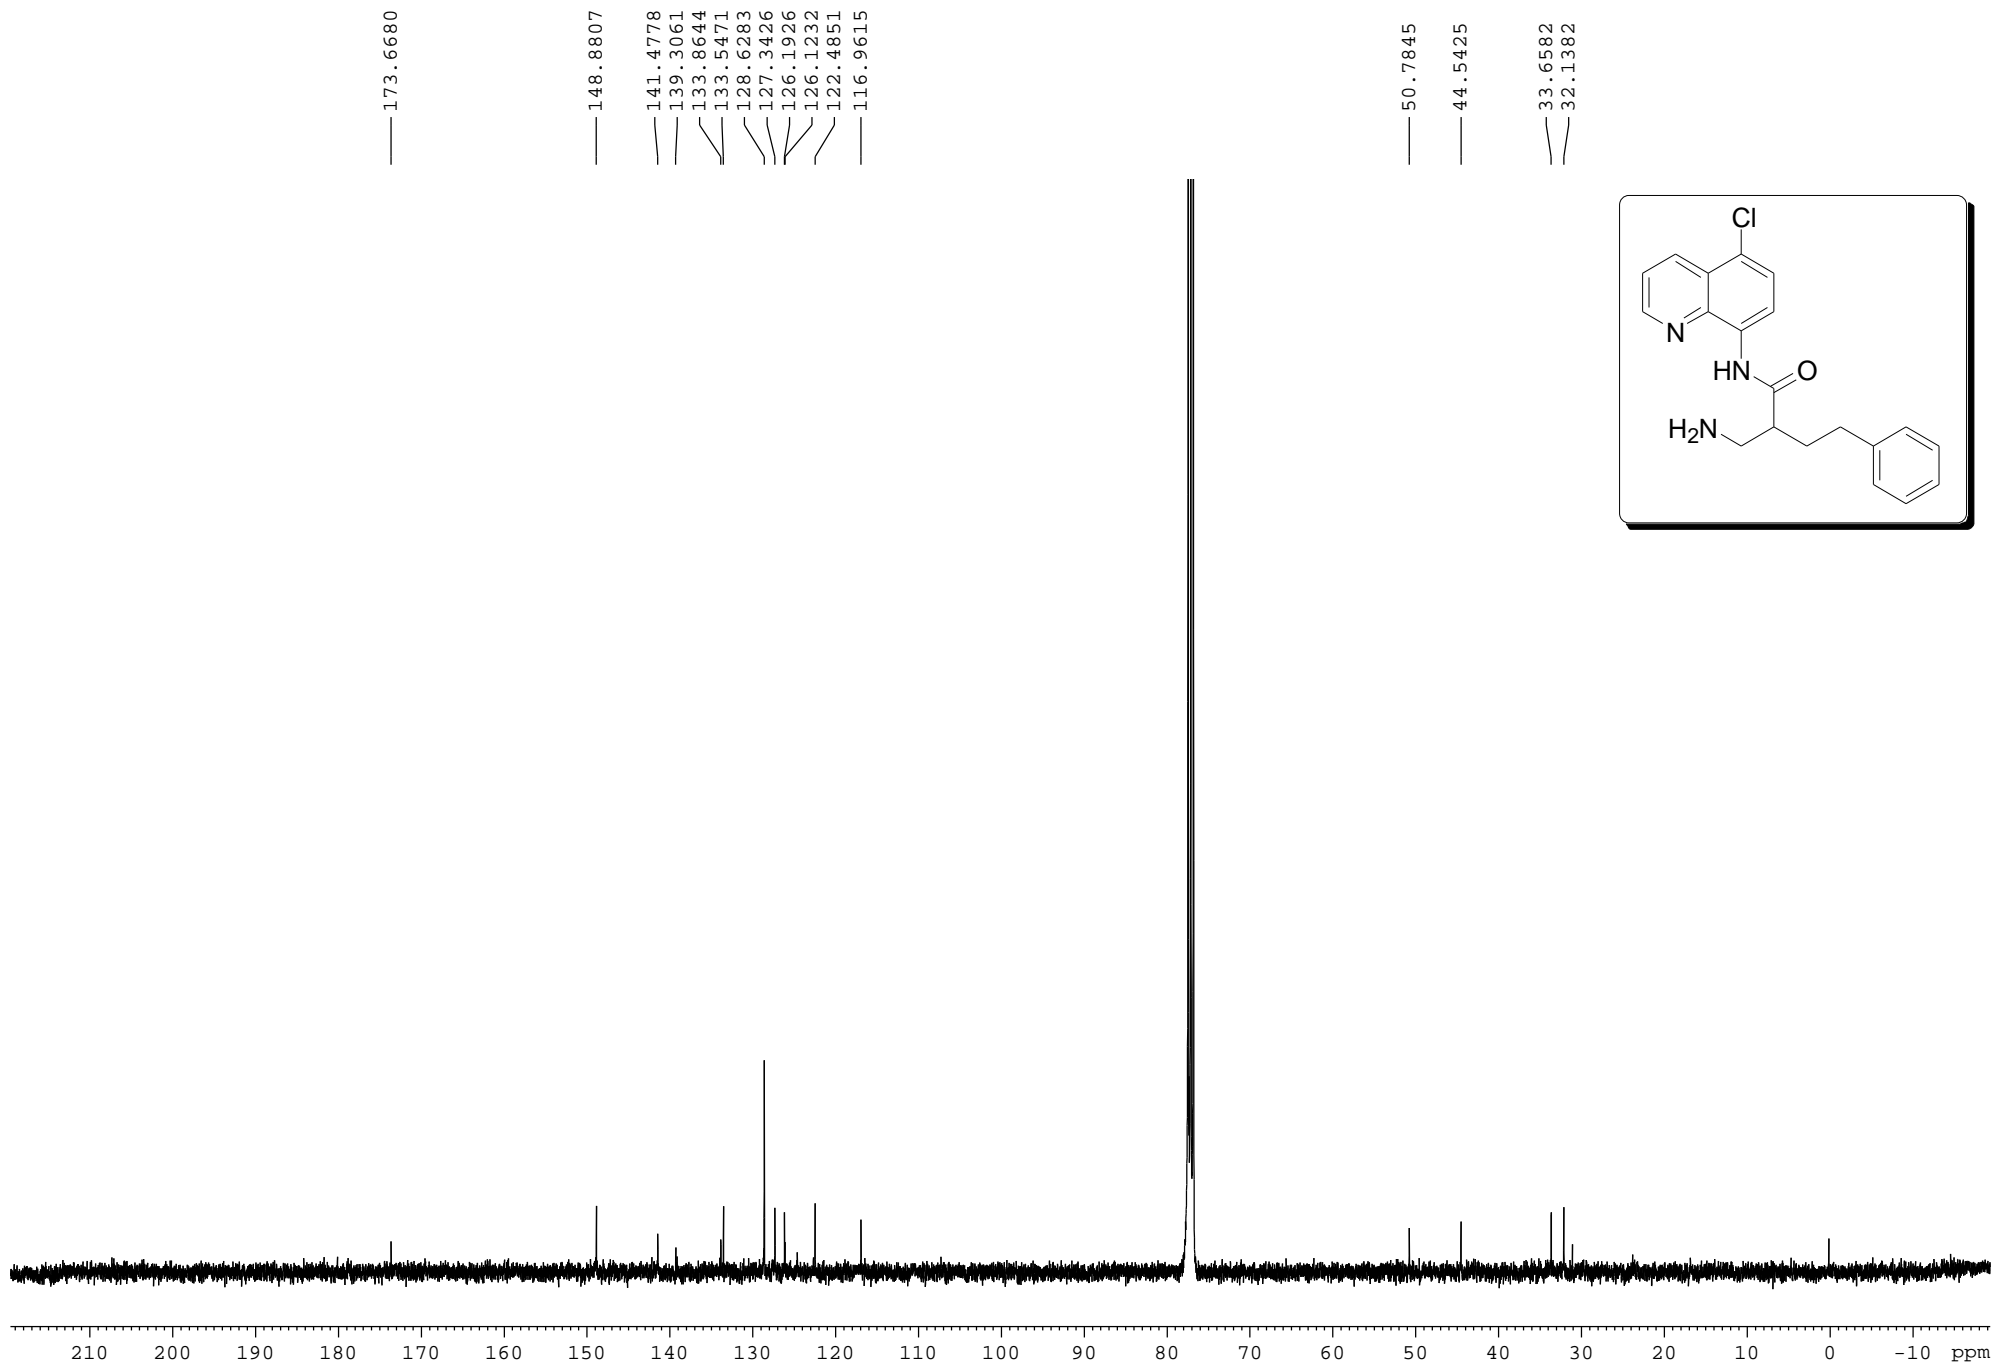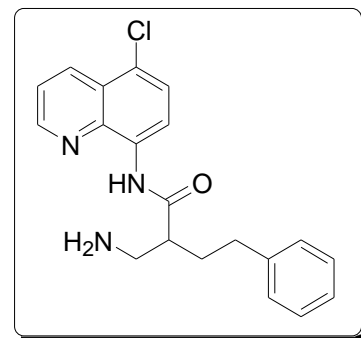

Current Data Parameters  
 NAME YXL-8-293-H-20141222  
 EXPNO 10  
 PROCNO 1

F2 - Acquisition Parameters  
 Date\_ 20141222  
 Time 21.10  
 INSTRUM spect  
 PROBHD 5 mm PABBO BB-  
 PULPROG zg30  
 TD 65536  
 SOLVENT CDCl3  
 NS 16  
 DS 2  
 SWH 8223.685 Hz  
 FIDRES 0.125483 Hz  
 AQ 3.9846387 sec  
 RG 144.49  
 DW 60.800 usec  
 DE 6.50 usec  
 TE 297.0 K  
 D1 1.00000000 sec  
 TD0 1

==== CHANNEL f1 =====  
 NUC1 1H  
 P1 14.83 usec  
 PLW1 13.00199986 W  
 SFO1 400.1324710 MHz

F2 - Processing parameters  
 SI 65536  
 SF 400.1300098 MHz  
 WDW EM  
 SSB 0  
 LB 0.30 Hz  
 GB 0  
 PC 1.00

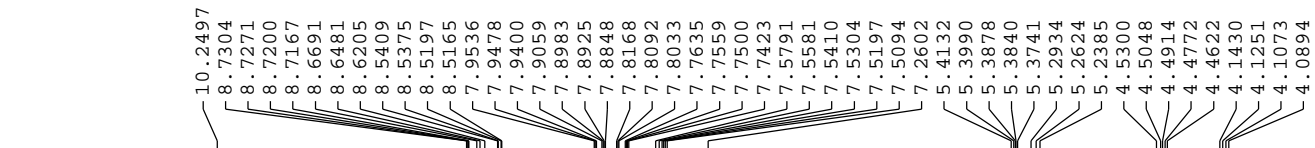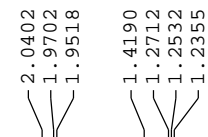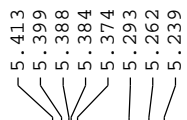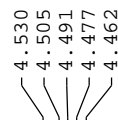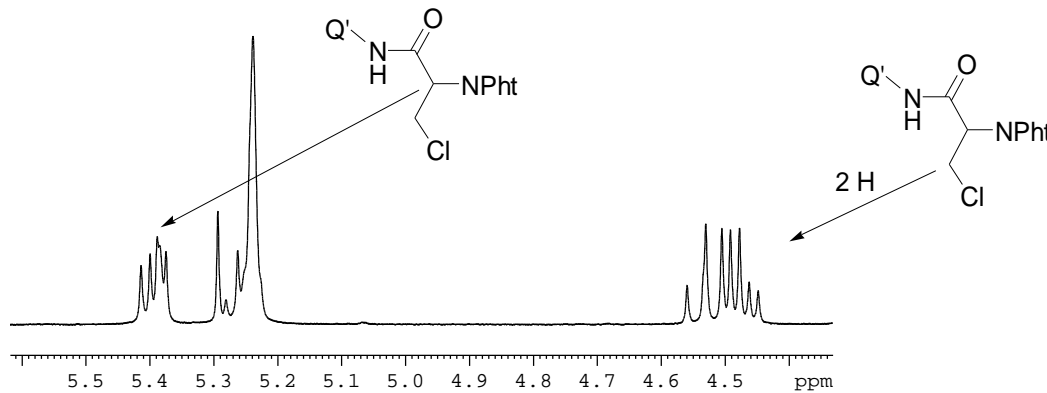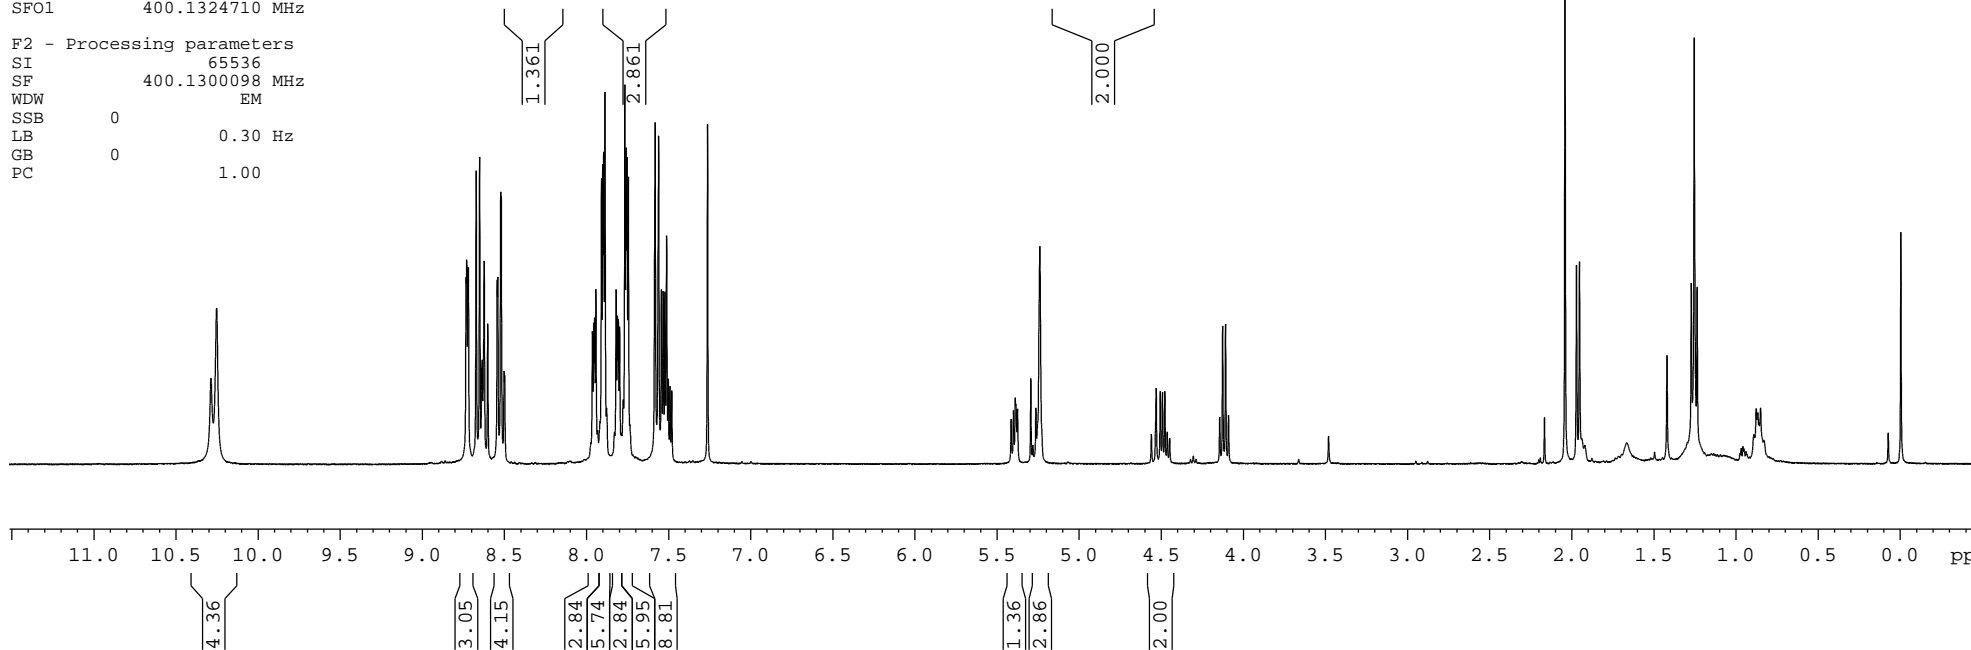

Current Data Parameters  
NAME YXL-8-278-3h-H-20141216  
EXPNO 20  
PROCNO 1

F2 - Acquisition Parameters  
Date\_ 20141216  
Time 20.20  
INSTRUM spect  
PROBHD 5 mm PABBO BB-  
PULPROG zg30  
TD 65536  
SOLVENT CDCl3  
NS 16  
DS 2  
SWH 8223.685 Hz  
FIDRES 0.125483 Hz  
AQ 3.9846387 sec  
RG 130.81  
DW 60.800 usec  
DE 6.50 usec  
TE 297.1 K  
D1 1.00000000 sec  
TD0 1

==== CHANNEL f1 =====  
NUC1 1H  
P1 14.83 usec  
PLW1 13.00199986 W  
SFO1 400.1324710 MHz

F2 - Processing parameters  
SI 65536  
SF 400.1300098 MHz  
WDW EM  
SSB 0  
LB 0.30 Hz  
GB 0  
PC 1.00

10.281  
10.151  
8.660  
8.638  
8.628  
8.613  
8.592  
8.523  
8.504  
8.396  
8.375  
8.078  
8.057  
7.959  
7.951  
7.946  
7.938  
7.902  
7.895  
7.889  
7.881  
7.821  
7.813  
7.807  
7.800  
7.766  
7.759  
7.753  
7.745  
7.583  
7.562  
7.516  
7.506  
7.495  
7.484  
7.260  
5.403  
5.389  
5.378  
5.364  
5.292  
5.270  
5.252  
5.234  
5.216  
4.547  
4.518  
4.493  
4.482  
4.468  
4.453  
4.439

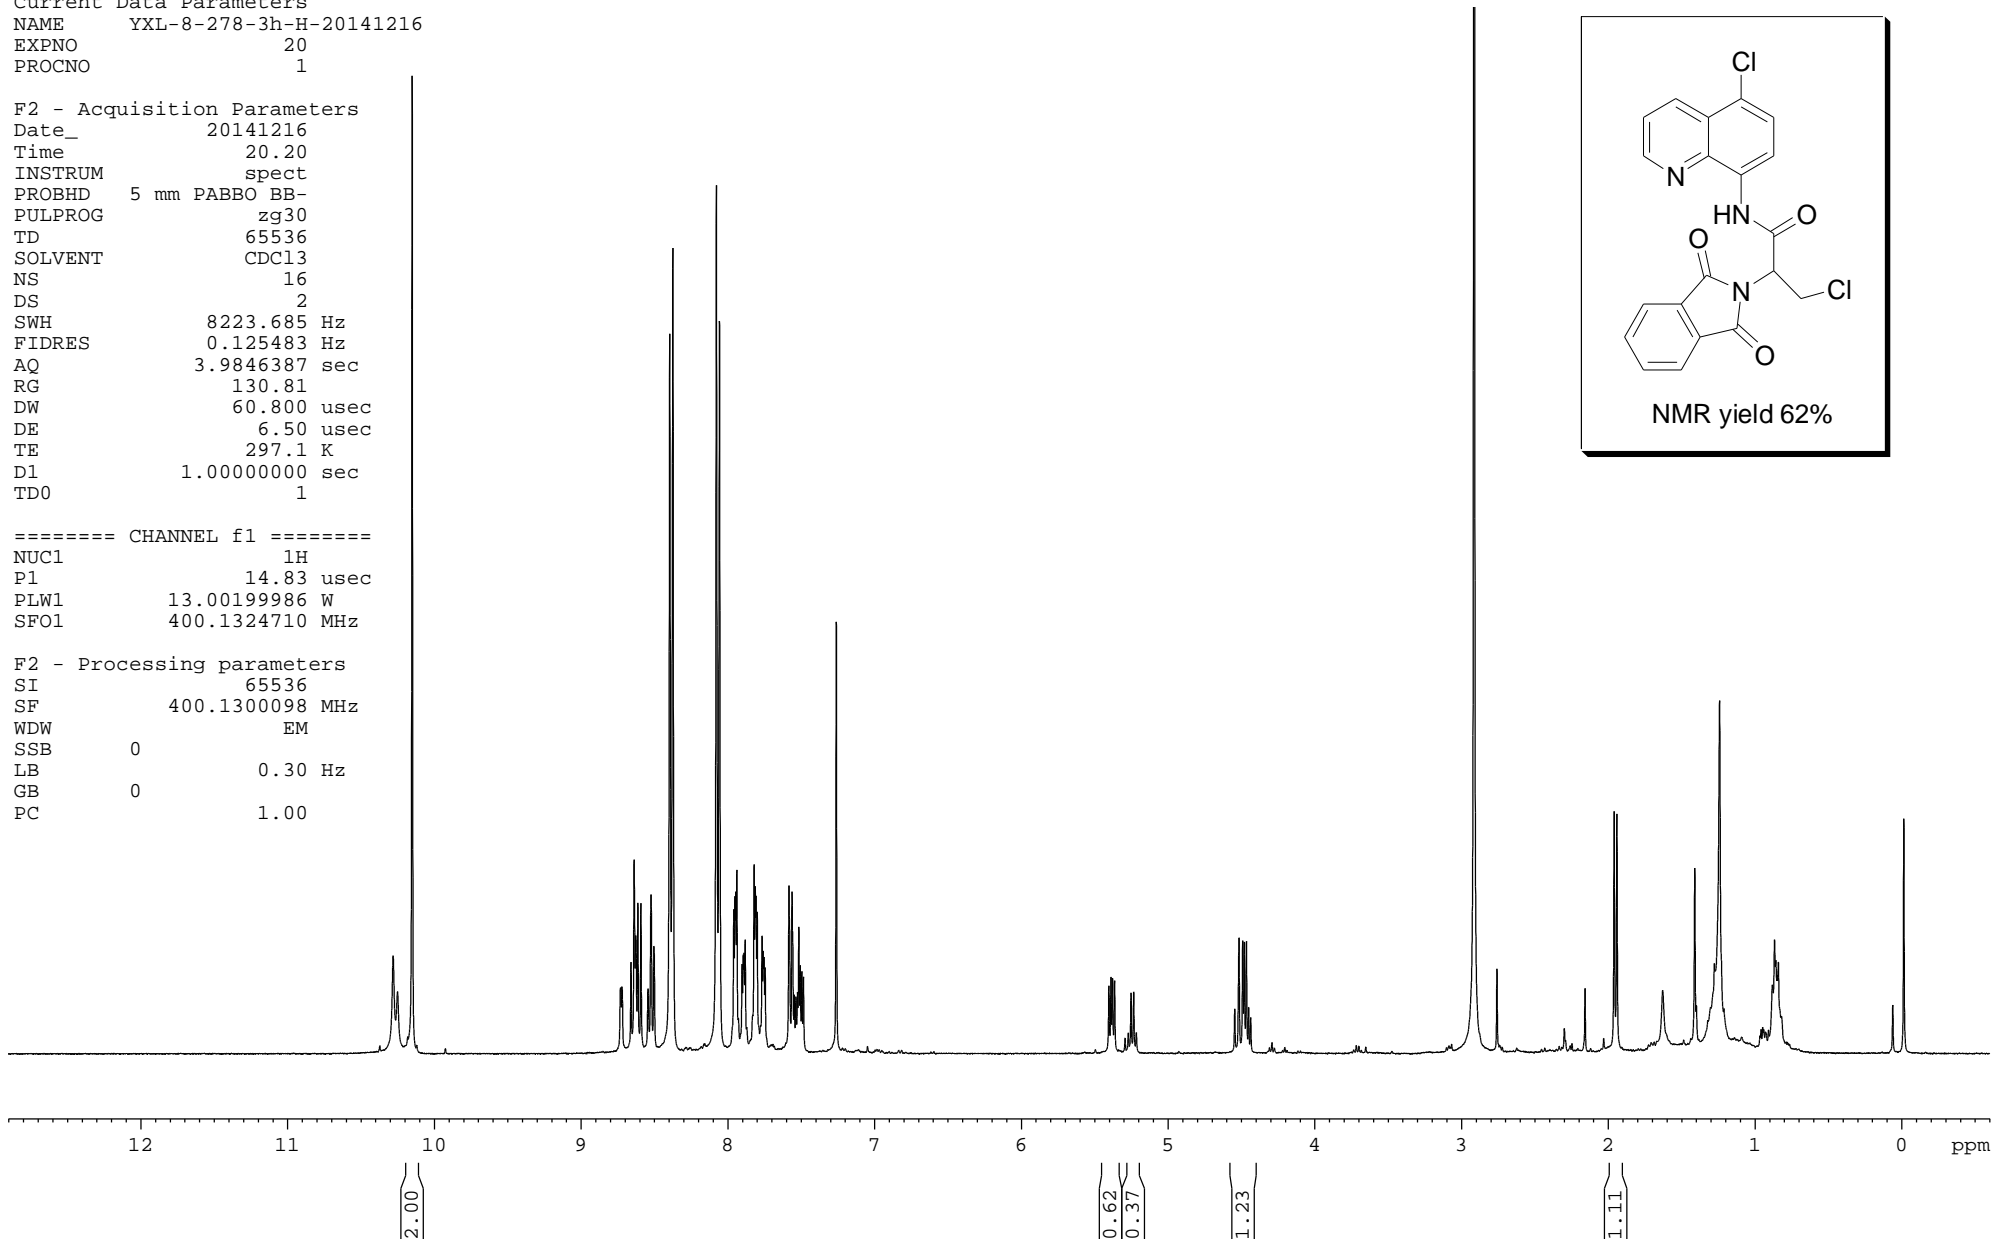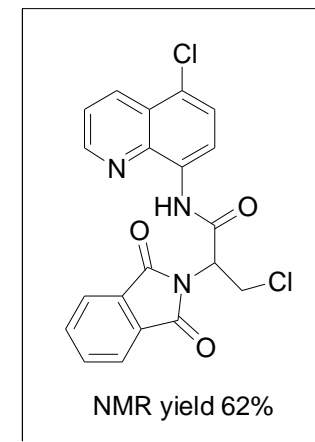



10.250  
 10.154  
 8.732  
 8.725  
 8.667  
 8.646  
 8.550  
 8.547  
 8.528  
 8.400  
 8.378  
 8.080  
 8.059  
 7.942  
 7.907  
 7.899  
 7.893  
 7.885  
 7.822  
 7.768  
 7.761  
 7.755  
 7.747  
 7.583  
 7.562  
 7.549  
 7.538  
 7.527  
 7.517  
 7.260

5.377  
 5.232

Current Data Parameters  
 NAME YXL-8-278-3h-D-20141216  
 EXPNO 10  
 PROCNO 1

F2 - Acquisition Parameters  
 Date\_ 20141216  
 Time 20.25  
 INSTRUM spect  
 PROBHD 5 mm PABBO BB-  
 PULPROG zg30  
 TD 65536  
 SOLVENT CDCl3  
 NS 16  
 DS 2  
 SWH 8223.685 Hz  
 FIDRES 0.125483 Hz  
 AQ 3.9846387 sec  
 RG 165.63  
 DW 60.800 usec  
 DE 6.50 usec  
 TE 297.1 K  
 D1 1.00000000 sec  
 TD0 1

===== CHANNEL f1 =====  
 NUC1 1H  
 P1 14.83 usec  
 PLW1 13.00199986 W  
 SFO1 400.1324710 MHz

F2 - Processing parameters  
 SI 65536  
 SF 400.1300101 MHz  
 WDW EM  
 SSB 0  
 LB 0.30 Hz  
 GB 0  
 PC 1.00

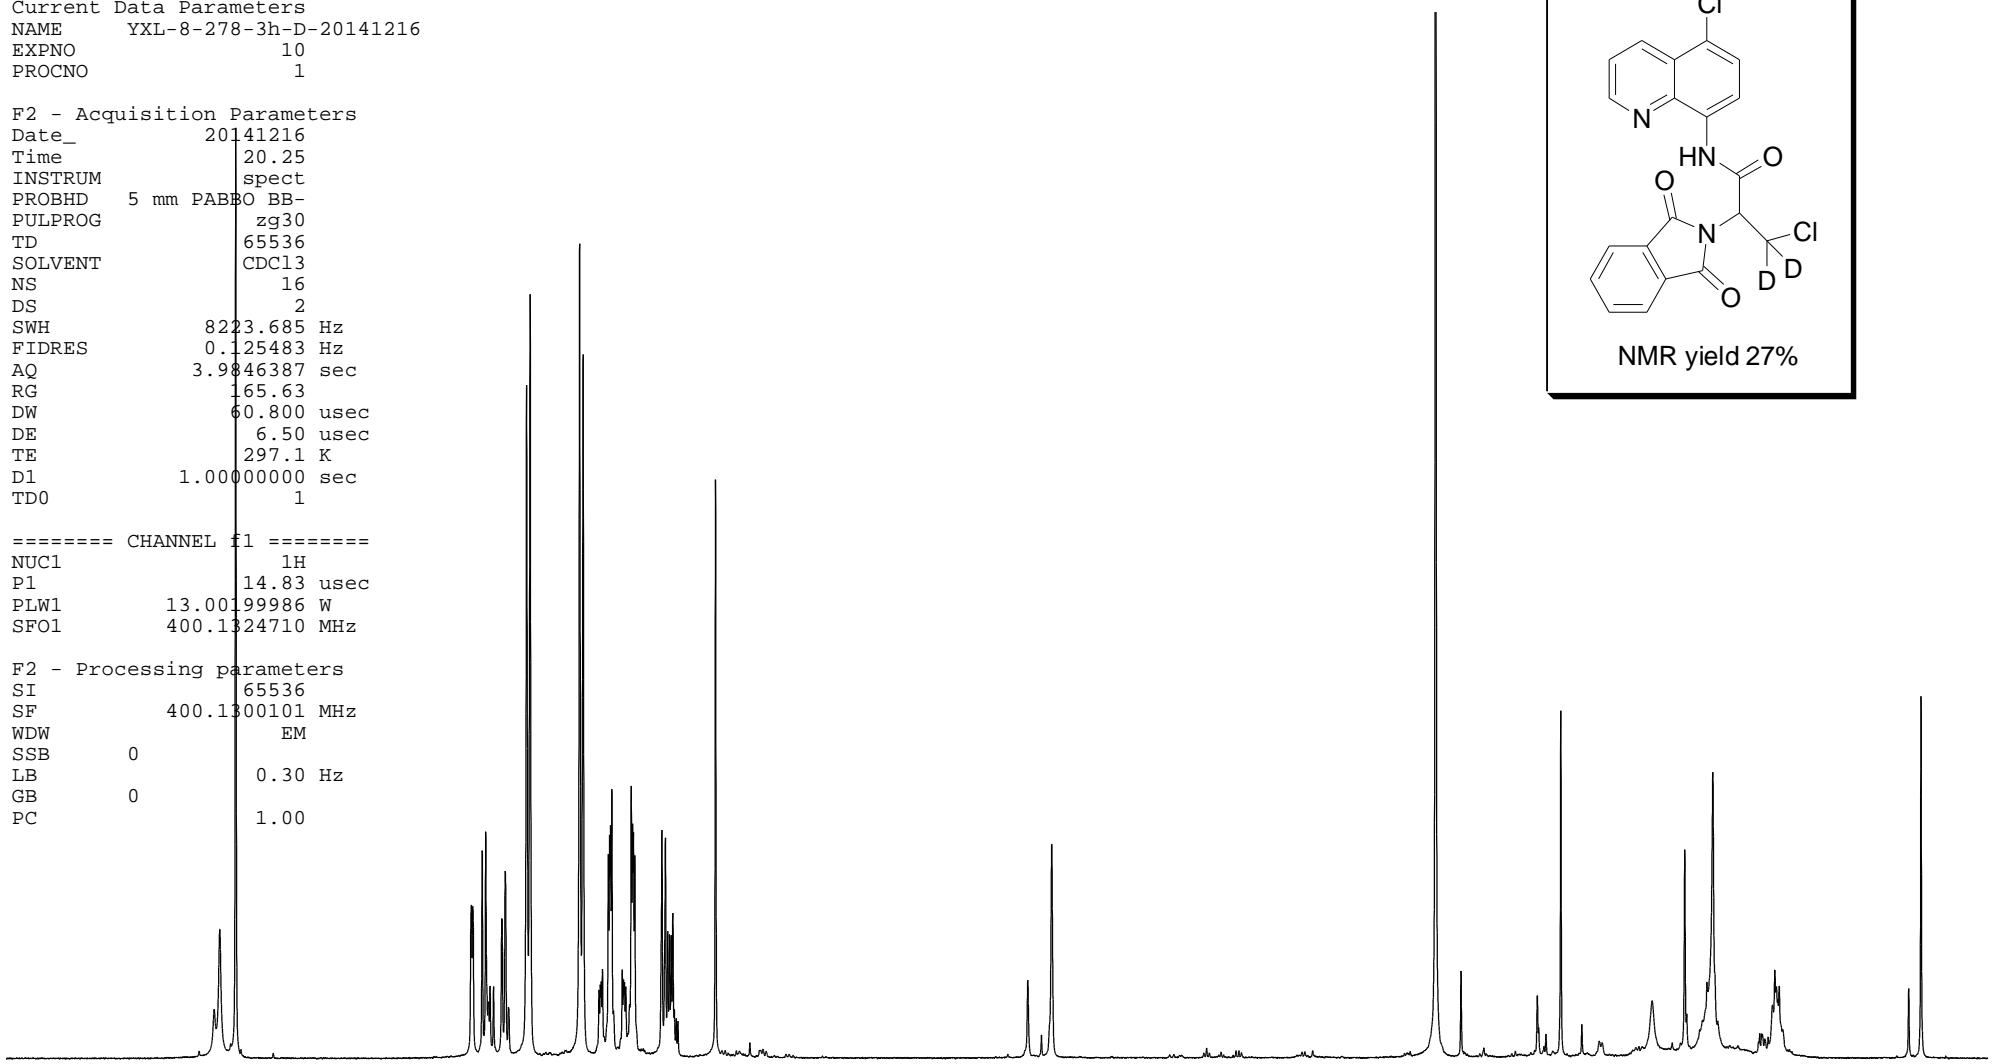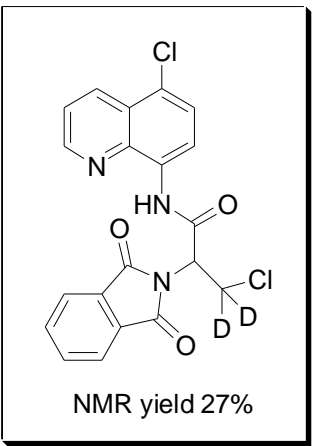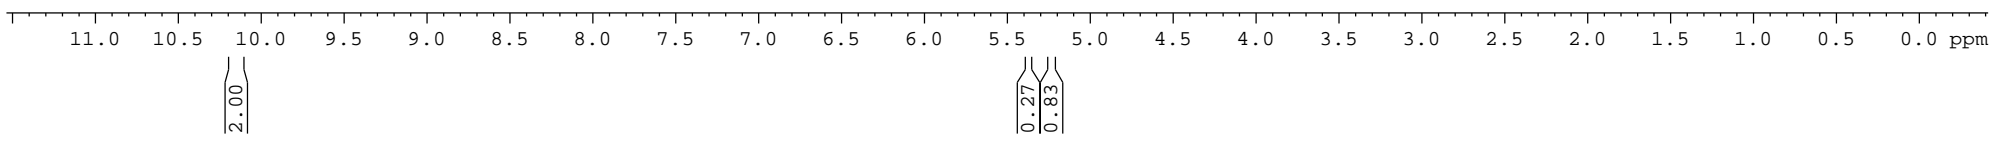

Current Data Parameters  
 NAME YXL-9-257-H-20150401  
 EXPNO 10  
 PROCNO 1

F2 - Acquisition Parameters  
 Date\_ 20150401  
 Time 21.04  
 INSTRUM spect  
 PROBHD 5 mm PABBO BB-  
 PULPROG zg30  
 TD 65536  
 SOLVENT CDCl3  
 NS 16  
 DS 2  
 SWH 8223.685 Hz  
 FIDRES 0.125483 Hz  
 AQ 3.9846387 sec  
 RG 209.25  
 DW 60.800 usec  
 DE 6.50 usec  
 TE 299.4 K  
 D1 1.0000000 sec  
 TD0 1

==== CHANNEL f1 =====  
 NUC1 1H  
 P1 14.83 usec  
 PLW1 13.00199986 W  
 SFO1 400.1324710 MHz

F2 - Processing parameters  
 SI 65536  
 SF 400.1300098 MHz  
 WDW EM  
 SSB 0  
 LB 0.30 Hz  
 GB 0  
 PC 1.00

9.1237  
 9.1021  
 8.8287  
 8.8166  
 8.5873  
 8.5840  
 8.5663  
 7.9354  
 7.9315  
 7.9292  
 7.9253  
 7.9058  
 7.8866  
 7.5686  
 7.5470  
 7.5074  
 7.4914  
 7.4886  
 7.4727  
 7.3889  
 7.3776  
 7.3725  
 7.3677  
 7.3611  
 7.3565  
 7.2598

2.9070  
 2.8885  
 2.8699  
 2.8513  
 1.9266  
 1.9059  
 1.8842  
 1.5969  
 1.5776  
 1.5557  
 1.2784  
 1.2607

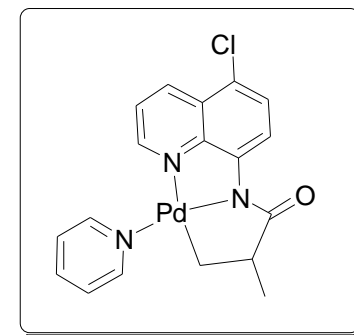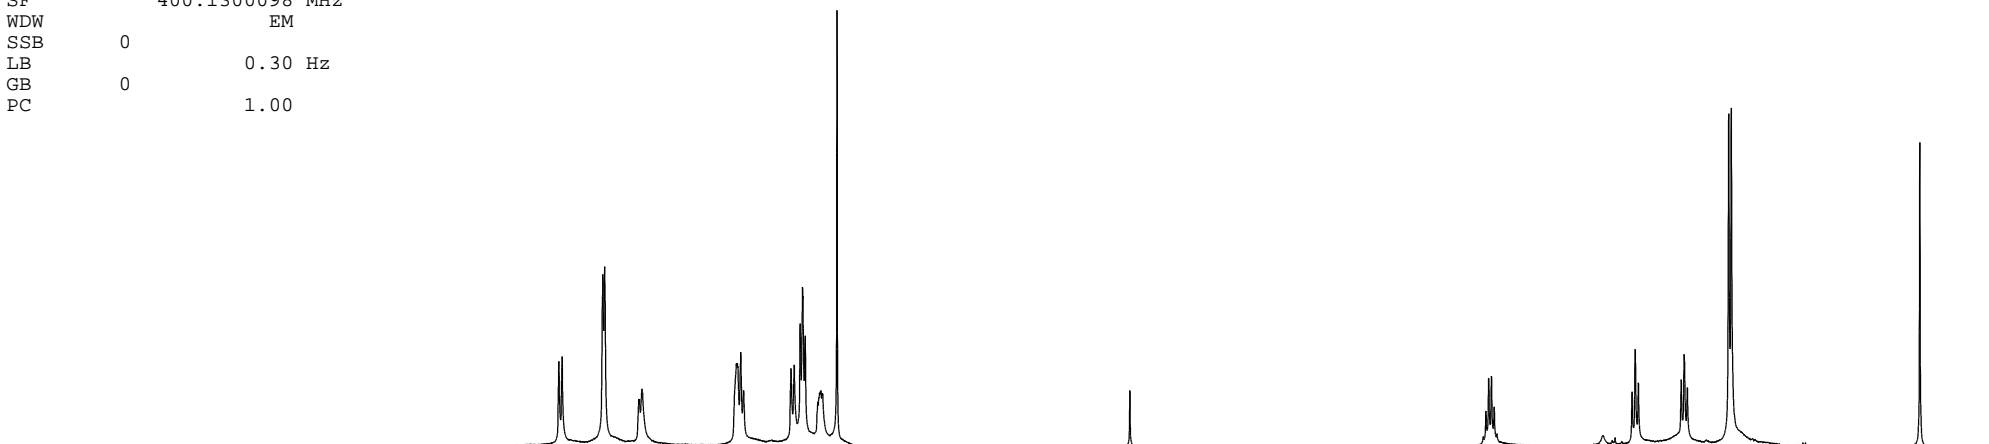

12

11

10

1.00

2.14

1.04

2.00

2.91

1.14

1.02

1.01

1.18

3.10

0 ppm

— 187.90

— 152.34  
— 146.47  
— 145.92  
— 145.39  
— 137.63  
— 134.89  
— 129.15  
— 127.51  
— 125.82  
— 121.26  
— 120.32  
— 120.21

— 77.48  
— 77.16  
— 76.84

— 47.34

— 21.34  
— 19.21

Current Data Parameters  
NAME YXL-9-193-S-C-150315  
EXPNO 10  
PROCNO 1

F2 - Acquisition Parameters  
Date\_ 20150315  
Time 8.33  
INSTRUM spect  
PROBHD 5 mm PABBO BB/  
PULPROG zgpg30  
TD 65536  
SOLVENT CDC13  
NS 700  
DS 4  
SWH 24038.461 Hz  
FIDRES 0.366798 Hz  
AQ 1.3631488 sec  
RG 202.1  
DW 20.800 usec  
DE 6.50 usec  
TE 297.2 K  
D1 2.00000000 sec  
D11 0.03000000 sec  
TD0 1

==== CHANNEL f1 =====  
SFO1 100.6228293 MHz  
NUC1 13C  
P1 9.85 usec  
PLW1 65.00000000 W

==== CHANNEL f2 =====  
SFO2 400.1316005 MHz  
NUC2 1H  
CPDPRG[2] waltz16  
PCPD2 90.00 usec  
PLW2 19.00000000 W  
PLW12 0.18082000 W  
PLW13 0.14647000 W

F2 - Processing parameters  
SI 32768  
SF 100.6127558 MHz  
WDW EM  
SSB 0  
LB 1.00 Hz  
GB 0  
PC 1.40

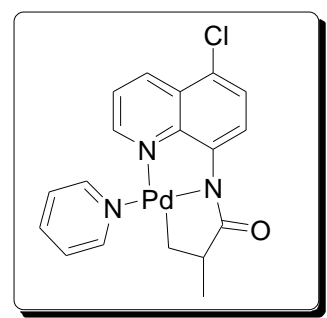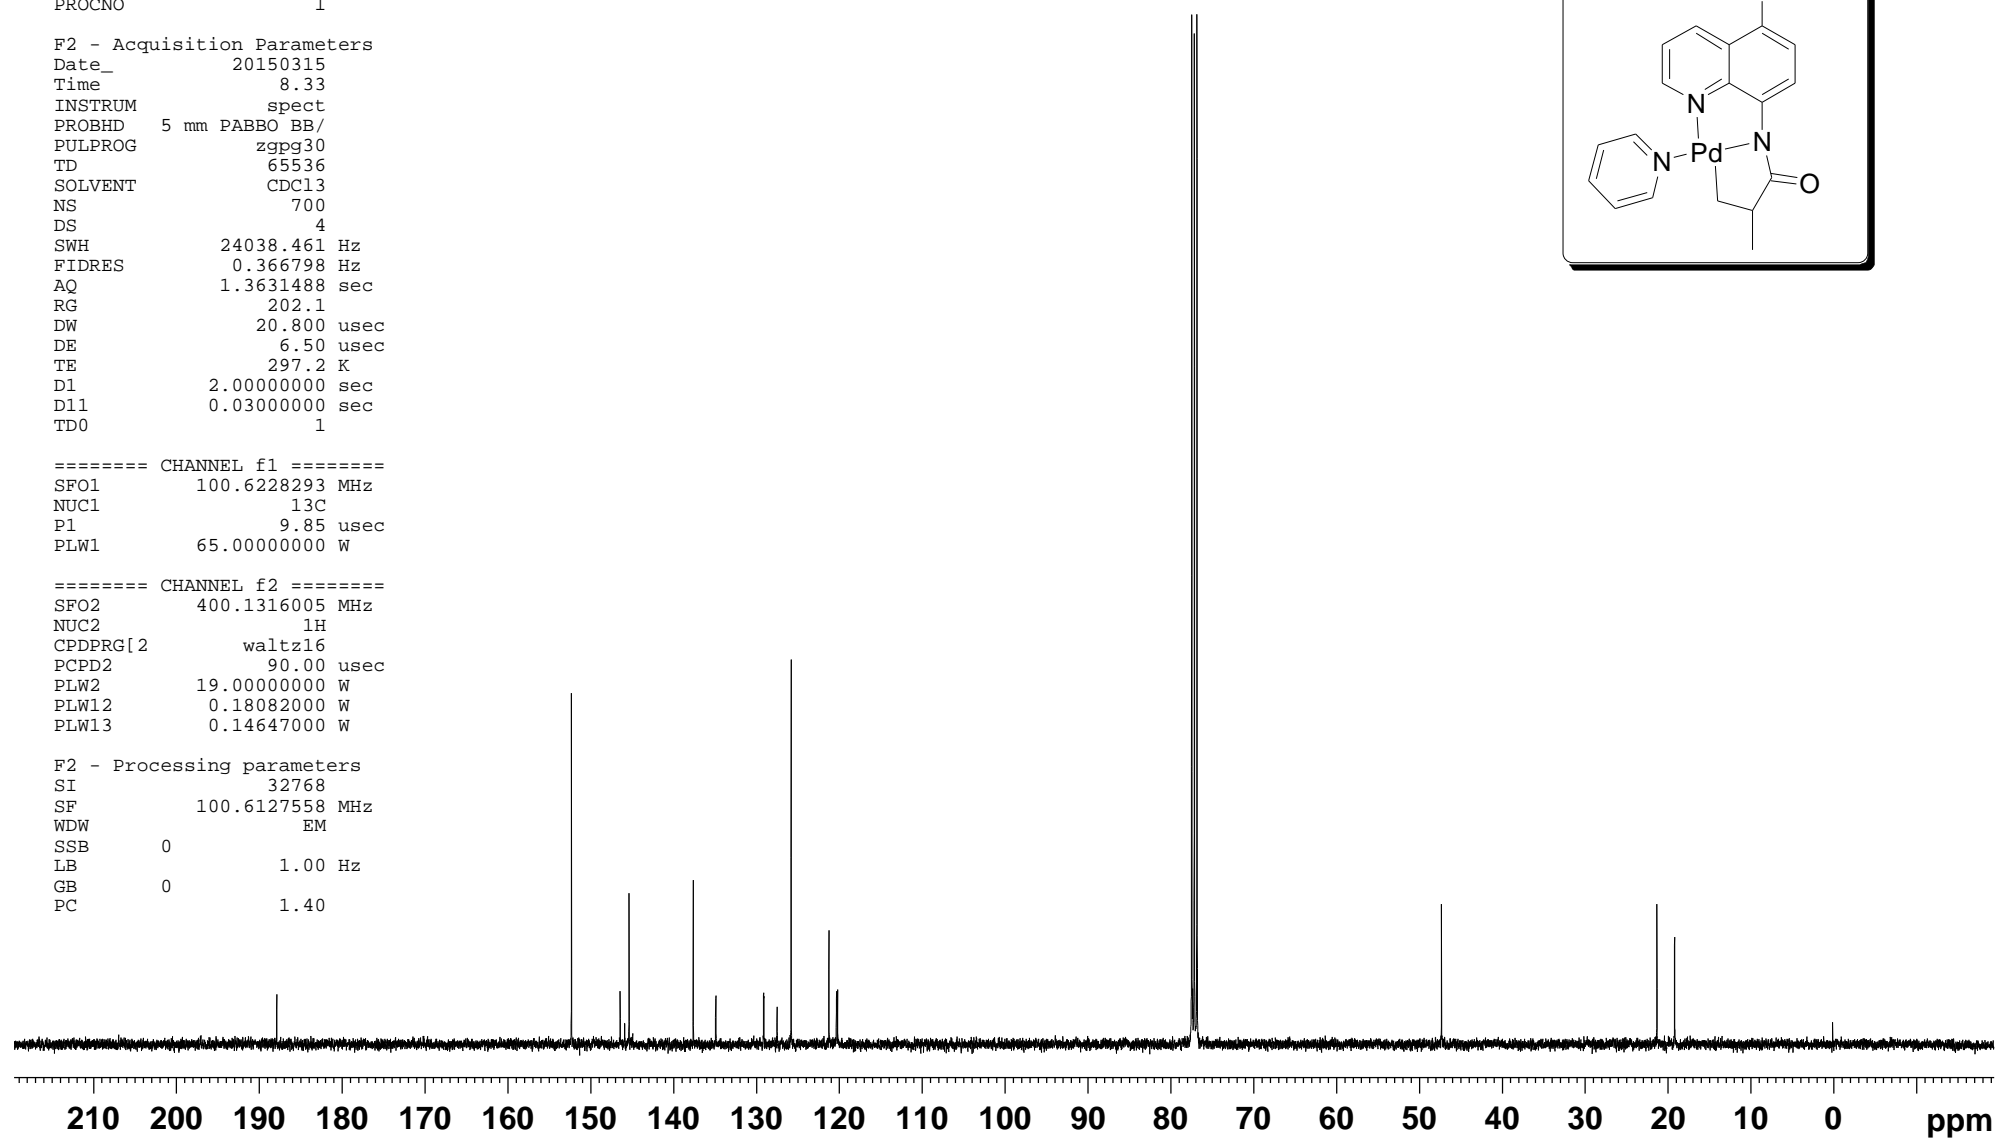

9.1419  
9.1221  
9.0956  
8.9491  
8.9369  
8.1398  
8.1310  
8.1221  
8.1192  
7.9158  
7.8966  
7.8811  
7.8775  
7.7712  
7.7680  
7.7600  
7.7568  
7.6859  
7.6778  
7.6745  
7.5275  
7.5181  
7.5075  
7.4989  
7.4871  
7.4841  
7.4809  
7.4649  
7.4492  
7.2600  
7.2278  
7.2158  
7.2071  
7.1951  
7.1840  
7.1726  
2.9420  
2.9283  
2.9146  
2.9009  
2.8587  
2.8514  
2.6253  
2.6130  
2.6031  
2.5909  
2.5783  
2.5436  
2.5363  
2.1427  
2.1261  
2.1115  
1.9621  
1.7560  
1.7467  
1.7338  
1.7231  
1.7121  
1.7008  
1.6904  
1.6789  
1.6617  
1.6218  
1.6113  
1.5973  
1.5880  
1.5775  
1.5635  
1.5544  
1.5390  
1.5103  
1.4805  
1.4391  
1.4321  
1.4167  
1.3805  
1.3638  
1.3330  
1.3088  
1.2880  
1.2801  
1.2534  
1.2355  
1.2128  
1.2062  
1.1906  
1.1161  
1.0910

Current Data Parameters

NAME YXL-7-149-S-H-20140405  
EXPNO 10  
PROCNO 1

F2 - Acquisition Parameters

Date\_ 20140405  
Time 21.21  
INSTRUM spect  
PROBHD 5 mm PABBO BB-  
PULPROG zg30  
TD 65536  
SOLVENT CDCl3  
NS 16  
DS 2  
SWH 8223.685 Hz  
FIDRES 0.125483 Hz  
AQ 3.9846387 sec  
RG 184.16  
DW 60.800 usec  
DE 6.50 usec  
TE 298.3 K  
D1 1.00000000 sec  
TD0 1

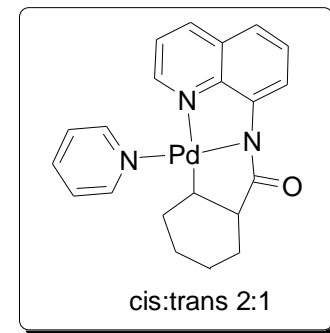

==== CHANNEL f1 =====

NUC1 1H  
P1 14.95 usec  
PLW1 13.00199986 W  
SFO1 400.1324710 MHz

F2 - Processing parameters

SI 65536  
SF 400.1300100 MHz  
WDW EM  
SSB 0  
LB 0.30 Hz  
GB 0  
PC 1.00

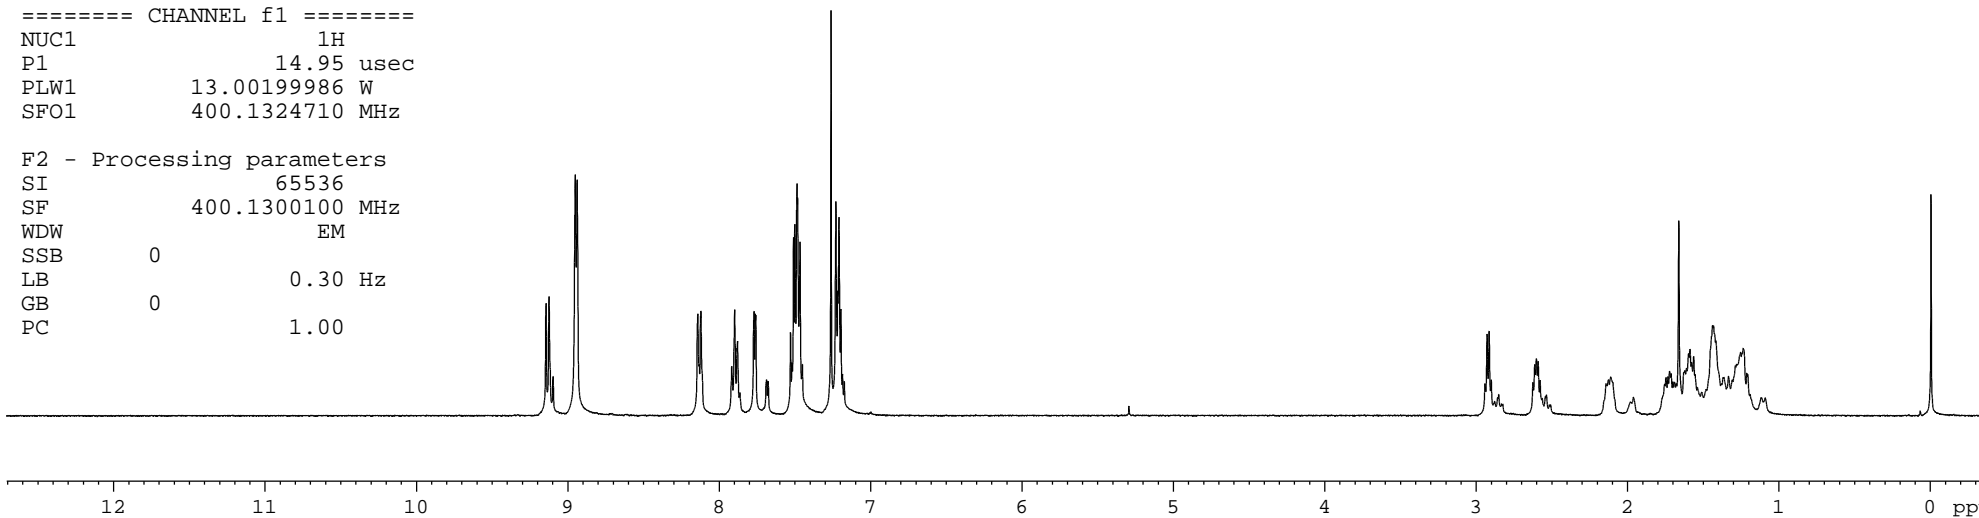

1.42  
2.93  
1.45  
1.41  
1.08  
0.47  
4.31  
2.94  
1.00  
0.43  
1.03  
0.44  
1.09  
0.49  
11.35  
0.94

185.76  
184.46

152.60  
152.35  
147.21  
145.10  
144.91  
144.87  
137.84  
137.79  
137.44  
130.01  
129.94  
129.33  
125.72  
125.64  
120.51  
120.21  
120.17  
117.70  
117.66

60.15  
56.01

34.80  
34.66  
32.84  
32.77  
31.50  
28.96  
27.56  
27.19  
25.31

Current Data Parameters

NAME YXL-7-269-S-C-201405

EXPNO 10

PROCNO 1

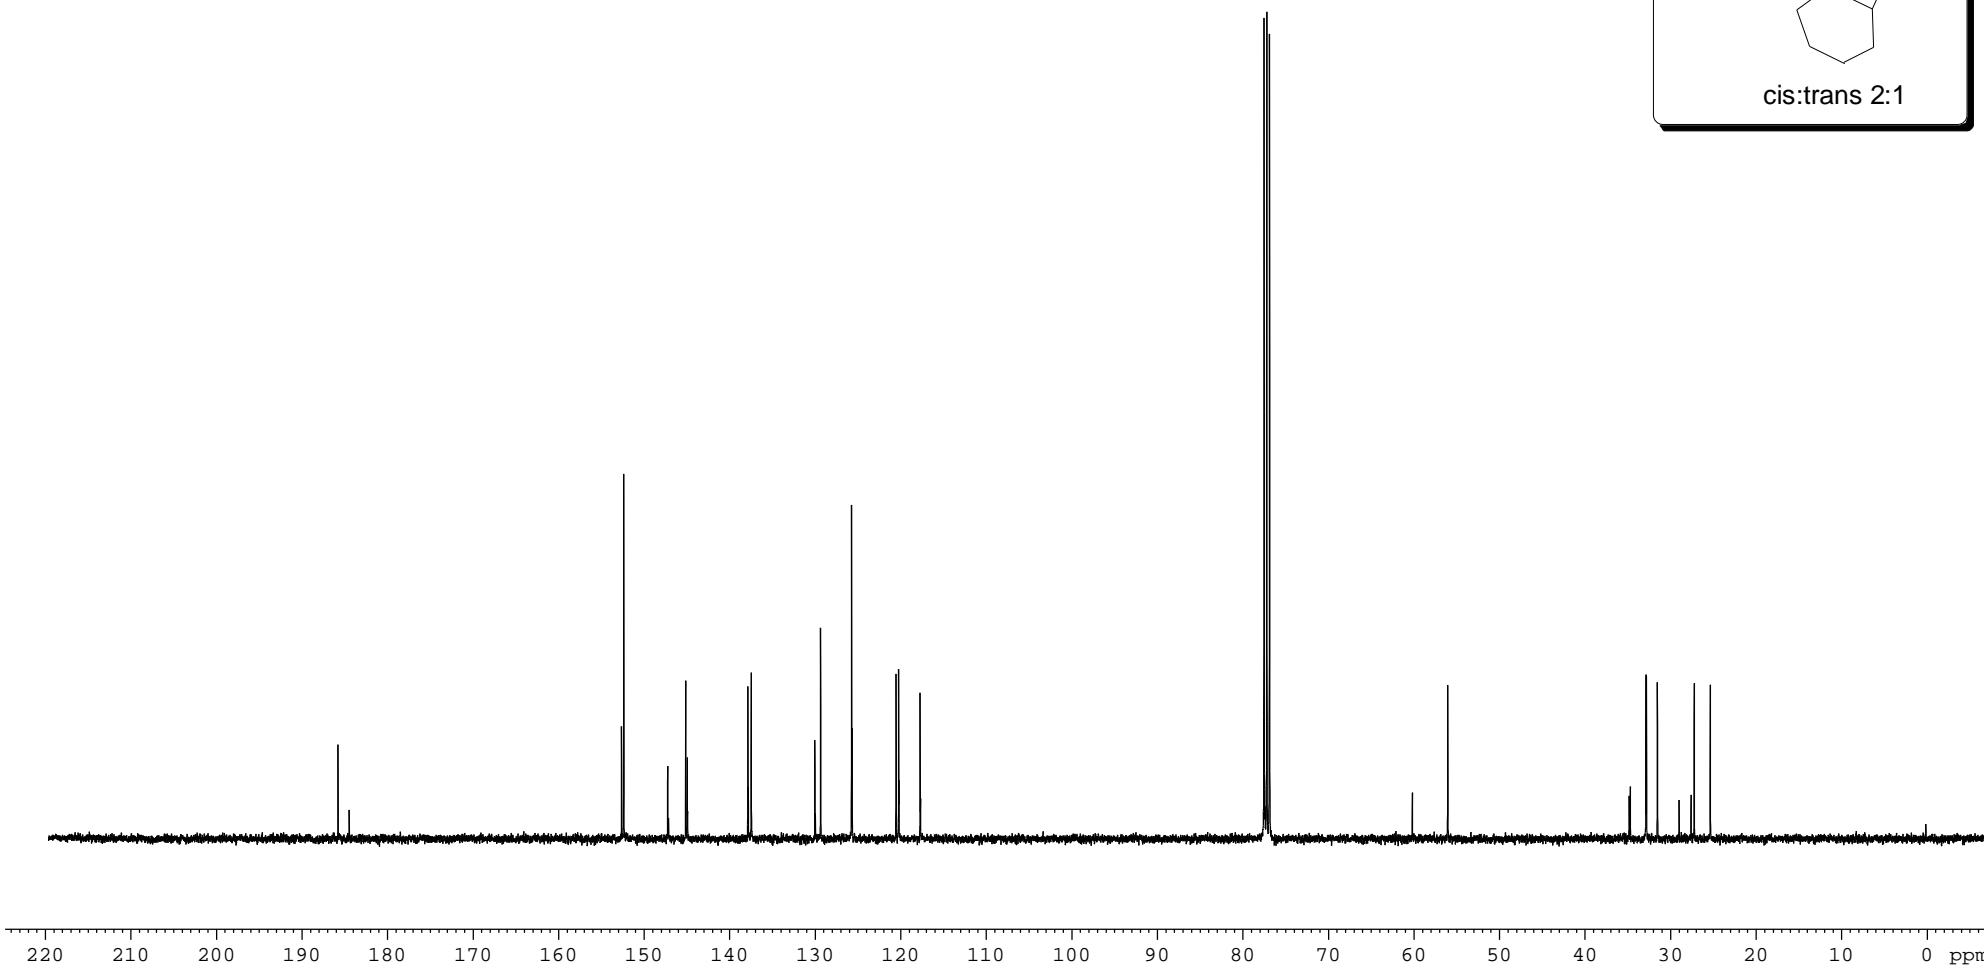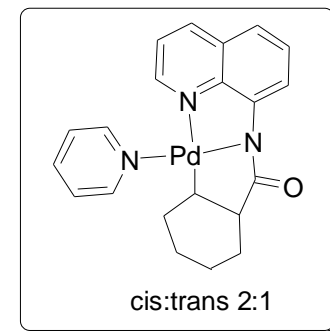

Current Data Parameters  
 NAME YXL-7-142-2-1-H-140401  
 EXPNO 20  
 PROCNO 1

F2 - Acquisition Parameters  
 Date\_ 20140401  
 Time 13.00  
 INSTRUM spect  
 PROBHD 5 mm PABBO BB/  
 PULPROG zg30  
 TD 65536  
 SOLVENT CDCl3  
 NS 16  
 DS 2  
 SWH 8012.820 Hz  
 FIDRES 0.122266 Hz  
 AQ 4.0894966 sec  
 RG 73.55  
 DW 62.400 usec  
 DE 6.50 usec  
 TE 297.0 K  
 D1 1.00000000 sec  
 TD0 1

==== CHANNEL f1 =====  
 SFO1 400.1324710 MHz  
 NUC1 1H  
 P1 9.22 usec  
 PLW1 19.00000000 W

F2 - Processing parameters  
 SI 65536  
 SF 400.1300097 MHz  
 WDW EM  
 SSB 0  
 LB 0.30 Hz  
 GB 0  
 PC 1.00

10.142  
 8.832  
 8.824  
 8.820  
 8.814  
 8.811  
 8.163  
 8.160  
 8.142  
 7.536  
 7.517  
 7.511  
 7.494  
 7.463  
 7.453  
 7.443  
 7.432  
 7.260

4.956  
 2.878  
 2.870  
 2.862  
 2.849  
 2.841  
 2.833  
 2.269  
 2.260  
 2.237  
 2.229  
 2.207  
 2.199  
 2.177  
 2.168  
 2.099  
 2.091  
 2.081  
 2.068  
 2.059  
 2.020  
 2.012  
 2.003  
 1.979  
 1.957  
 1.949  
 1.925  
 1.918  
 1.886  
 1.859  
 1.852  
 1.844  
 1.829  
 1.821  
 1.812  
 1.718  
 1.698  
 1.651  
 1.633  
 1.608  
 1.468

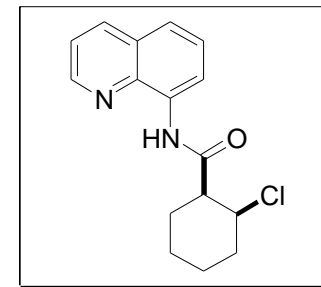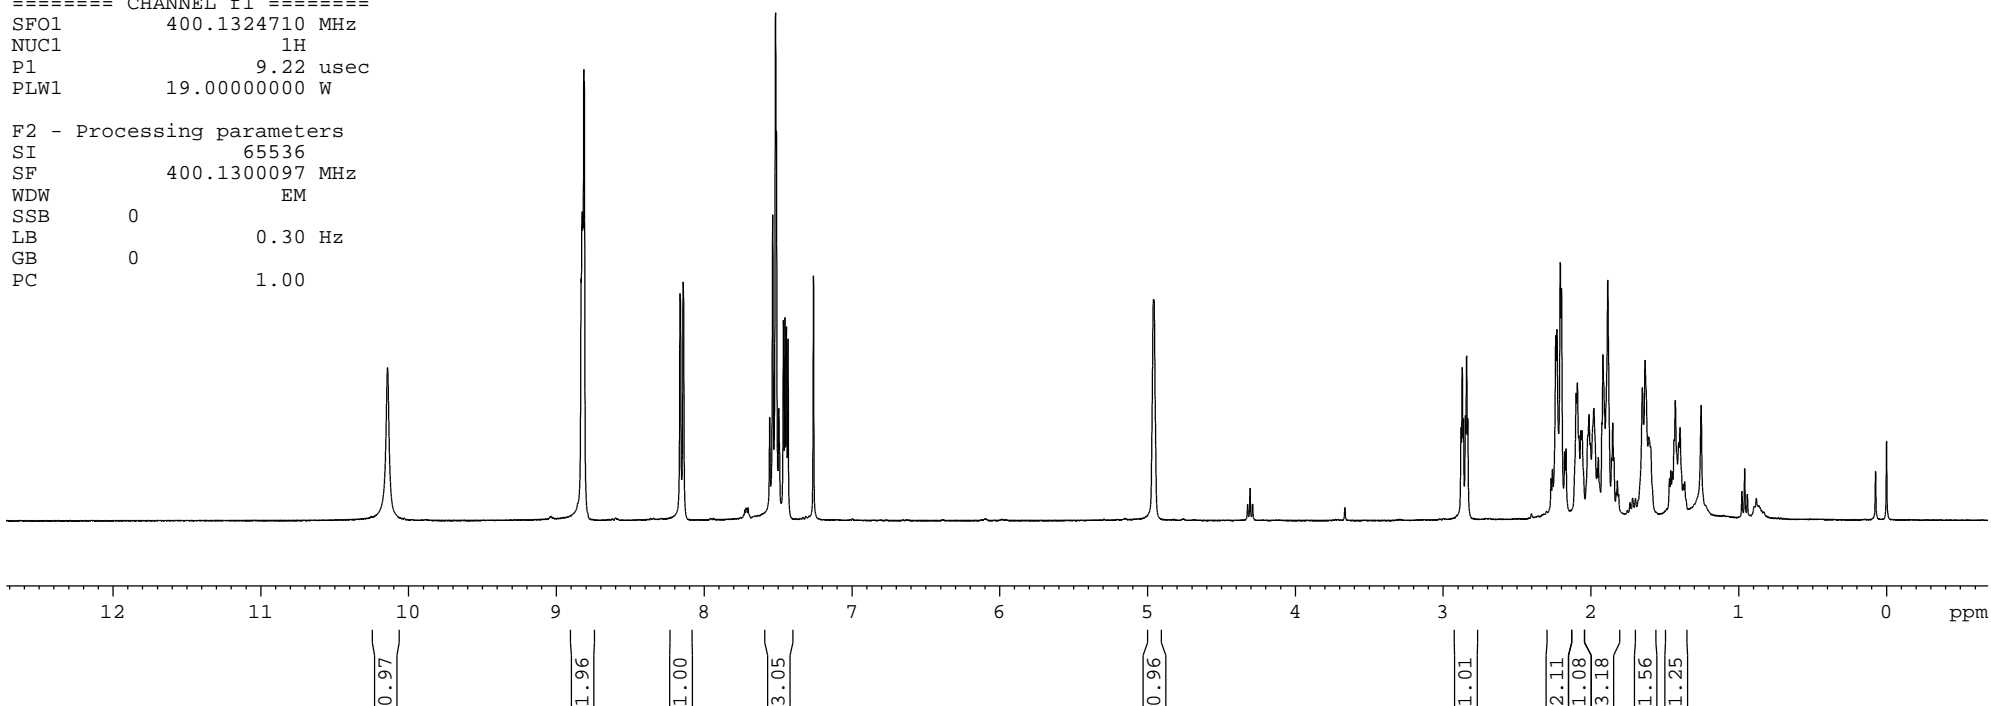

— 171.91

— 148.33

— 138.56

— 136.52

— 134.44

— 128.08

— 127.56

— 121.84

— 121.76

— 116.88

— 77.48

— 77.37

— 77.16

— 76.85

— 60.25

— 56.42

— 36.59

— 30.86

— 26.00

— 24.63

Current Data Parameters

NAME YXL-7-142-2-1-c-140401  
EXPNO 30  
PROCNO 1

F2 - Acquisition Parameters

Date\_ 20140401  
Time 13.52  
INSTRUM spect  
PROBHD 5 mm PABBO BB/  
PULPROG zgpg30  
TD 65536  
SOLVENT CDC13  
NS 500  
DS 4  
SWH 24038.461 Hz  
FIDRES 0.366798 Hz  
AQ 1.3631988 sec  
RG 202.1  
DW 20.800 usec  
DE 6.50 usec  
TE 297.0 K  
D1 2.00000000 sec  
d11 0.03000000 sec  
DELTA 1.89999998 sec  
TD0 1  
NUC1 13C  
P1 9.96 usec  
PLW1 65.00000000 W  
SFO1 100.6228293 MHz  
CPDPRG2  
NUC2 1H  
PLW2 19.00000000 W  
PLW12 0.19939999 W  
PLW13 0.16152000 W  
SFO2 400.1316005 MHz

F2 - Processing parameters

SI 32768  
SF 100.6127555 MHz  
WDW EM  
SSB 0  
LB 1.00 Hz  
GB 0  
PC 1.40

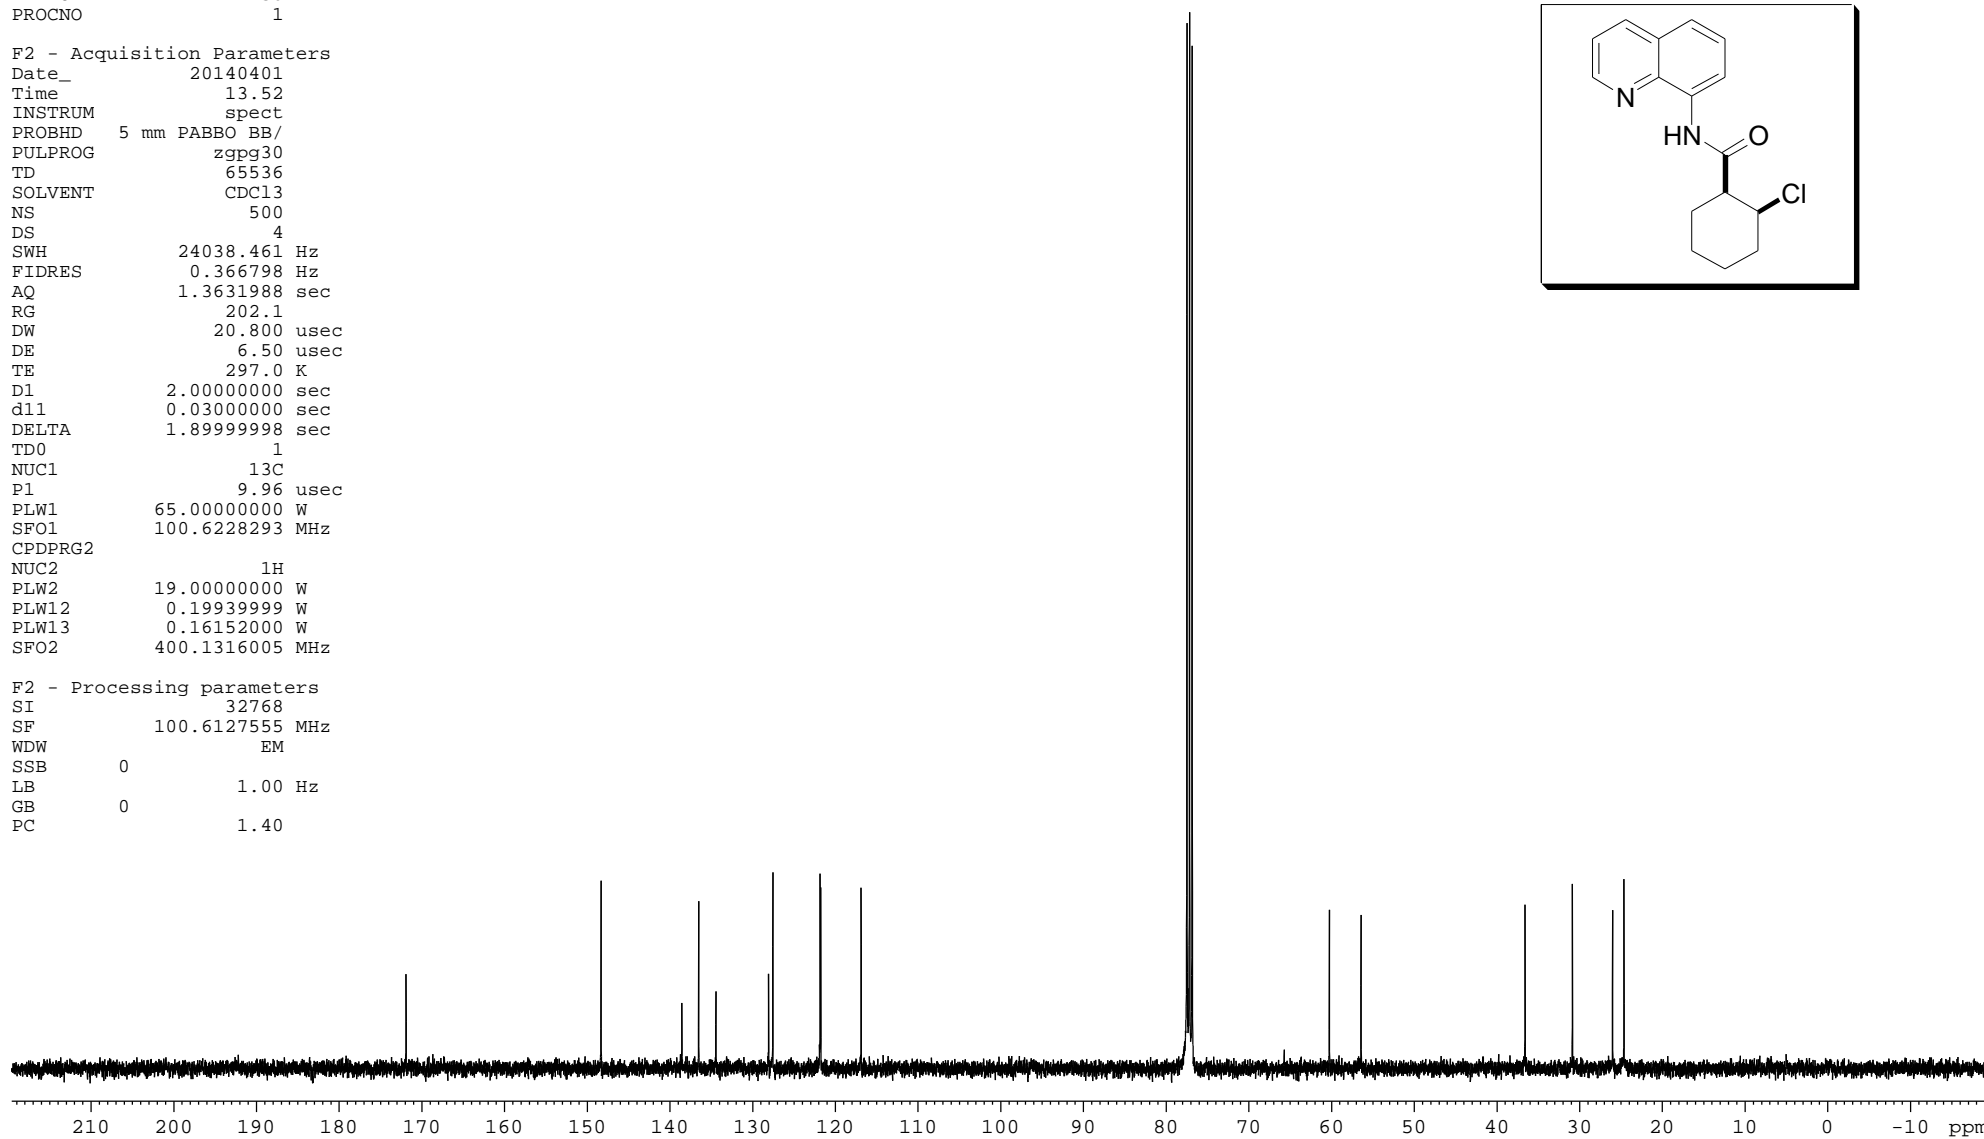

Current Data Parameters  
 NAME YXL-7-142-2-1-H-140401  
 EXPNO 10  
 PROCNO 1

F2 - Acquisition Parameters

Date\_ 20140401  
 Time 12.56  
 INSTRUM spect  
 PROBHD 5 mm PABBO BB/  
 PULPROG zg30  
 TD 65536  
 SOLVENT CDCl3  
 NS 16  
 DS 2  
 SWH 8012.820 Hz  
 FIDRES 0.122266 Hz  
 AQ 4.0894966 sec  
 RG 89.81  
 DW 62.400 usec  
 DE 6.50 usec  
 TE 297.0 K  
 D1 1.00000000 sec  
 TD0 1

==== CHANNEL f1 =====  
 SFO1 400.1324710 MHz  
 NUC1 1H  
 P1 9.22 usec  
 PLW1 19.00000000 W

F2 - Processing parameters

SI 65536  
 SF 400.1300096 MHz  
 WDW EM  
 SSB 0  
 LB 0.30 Hz  
 GB 0  
 PC 1.00

9.905  
 8.844  
 8.839  
 8.826  
 8.822  
 8.815  
 8.812  
 8.174  
 8.170  
 8.153  
 8.150  
 7.564  
 7.544  
 7.525  
 7.519  
 7.503  
 7.473  
 7.463  
 7.452  
 7.442  
 7.260

4.312  
 4.301  
 4.285  
 4.274  
 4.256  
 4.246  
 2.728  
 2.719  
 2.699  
 2.692  
 2.673  
 2.663  
 2.385  
 2.376  
 2.364  
 2.352  
 2.344  
 2.154  
 2.147  
 2.119  
 1.876  
 1.867  
 1.846  
 1.809  
 1.795  
 1.780  
 1.764  
 1.753  
 1.734  
 1.723  
 1.701  
 1.692  
 1.622  
 1.503  
 1.471  
 1.463  
 1.439  
 1.432  
 1.425  
 1.415  
 1.401

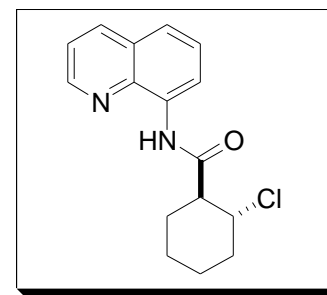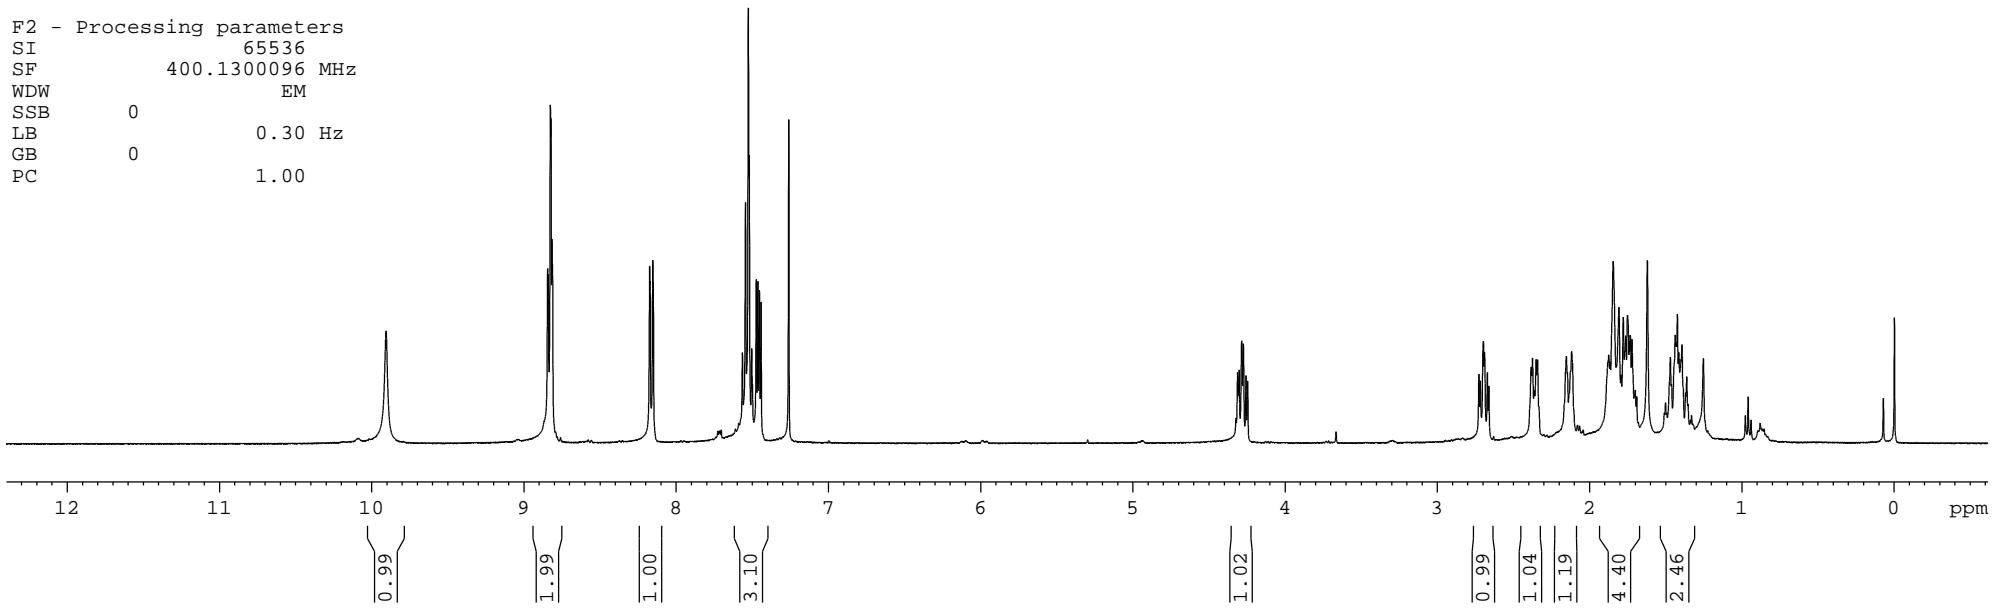



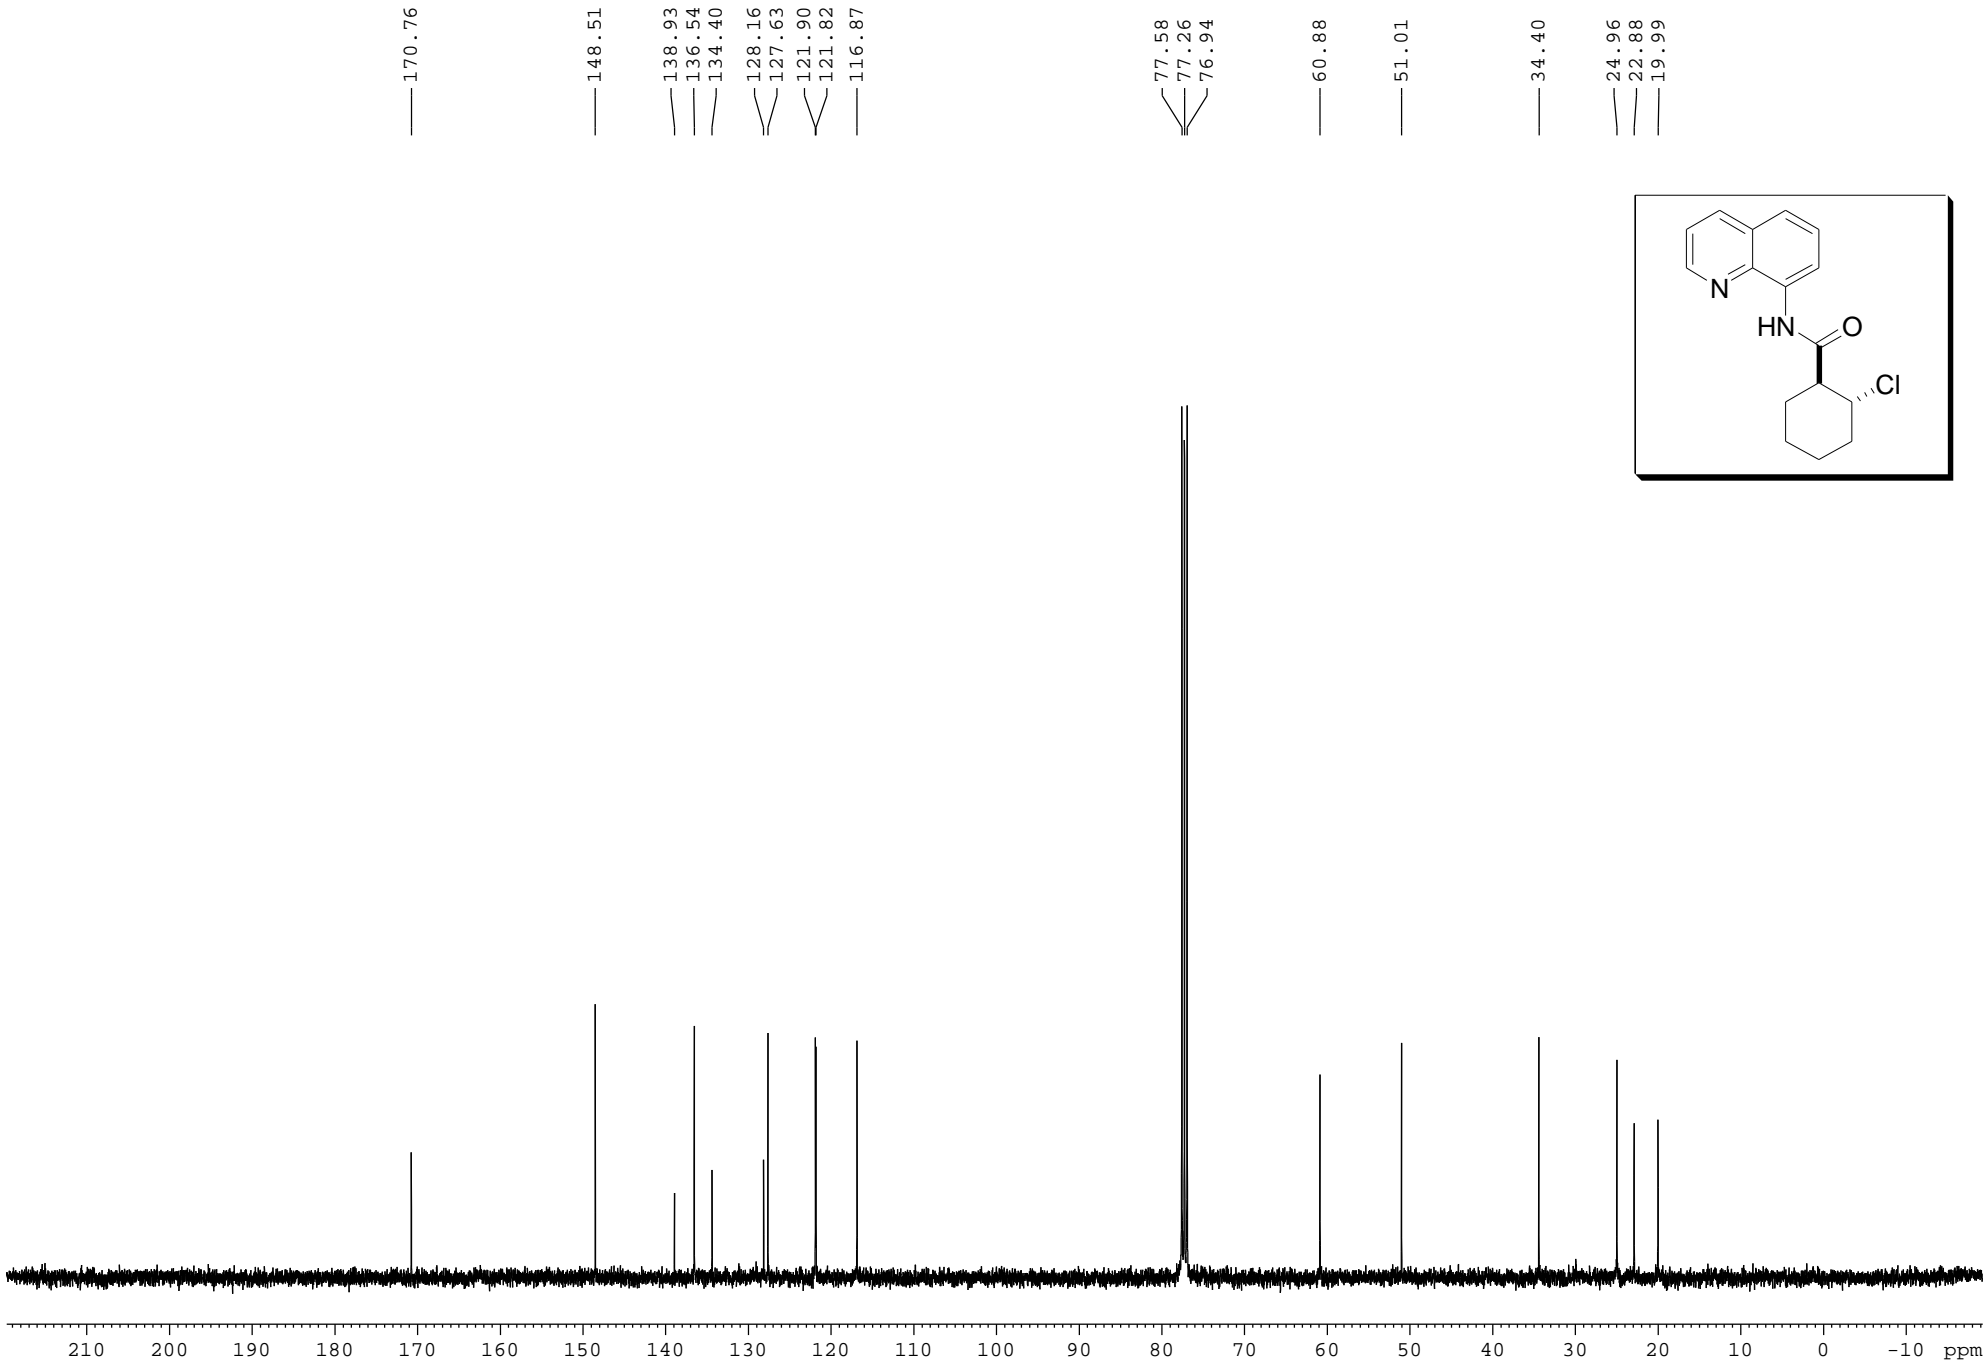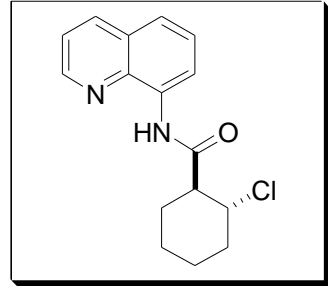

Supplement: c6cc00234j1.pdf [file c6cc00234j1.pdf]
